# Supplementary material for: An efficient and mild oxidative approach from thiols to sulfonyl derivatives with DMSO/HBr
Source: Royal Society of Chemistry journal article supplement (doi:10.1039/d3sc04945k), 2023-01-01
Supplement: d3sc04945k1.pdf [file d3sc04945k1.pdf]

## Supporting Information:

### Table of Contents

|                                                                       |          |
|-----------------------------------------------------------------------|----------|
| General Remarks                                                       | S2       |
| Mechanistic Studies                                                   | S2-S6    |
| Experimental Section                                                  | S7-S11   |
| Analytical Data for Products                                          | S11-S47  |
| References                                                            | S47-S48  |
| $^1\text{H}$ NMR, $^{13}\text{C}$ NMR and $^{19}\text{F}$ NMR Spectra | S49-S209 |

## General Remarks

All commercially available compounds were purchased from Sigma-Aldrich, Alfa-Aesar, Acros, Beijing Ouhe, and Beijing Chemical Works, Ltd. Unless otherwise noted, materials obtained from commercial suppliers were used without further purification. Analysis of crude reaction mixture was done on an Agilent 7890 GC System with an Agilent 5975 Mass Selective Detector. Products were purified by flash chromatography on silica gel.  $^1\text{H-NMR}$  spectra were recorded on Bruker AVANCE III-400 spectrometers. Chemical shifts (in ppm) were referenced to the solvent peak of  $\text{CDCl}_3$  (7.26 ppm) and  $\text{DMSO-d}_6$  (2.50 ppm).  $^{13}\text{C-NMR}$  spectra were obtained by using the same NMR spectrometers and were calibrated with  $\text{CDCl}_3$  ( $\delta = 77.0$  ppm) and  $\text{DMSO-d}_6$  (39.5 ppm). Mass spectra were recorded using a PE SCLEX QSTAR spectrometer. High resolution mass spectra were obtained with a Bruker APEX IV Fourier transform ion cyclotron resonance mass spectrometer.

## Mechanistic Studies

(1)  $^{18}\text{O}$  labeling experiments

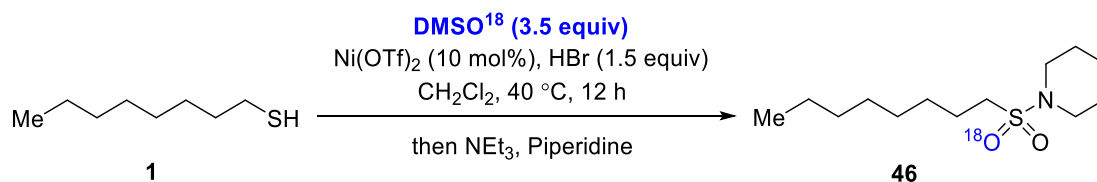

To a solution of  $\text{Ni}(\text{OTf})_2$  (0.05 mmol, 17.8 mg), octane-1-thiol (0.50 mmol, 73.1 mg),  $\text{DMSO}^{18}$  (1.75 mmol, 120  $\mu\text{L}$ ) in DCM (2 mL), HBr (AcOH solution, 33% w/w, 0.75 mmol, 120  $\mu\text{L}$ ) was added. The mixture was stirred in anhydrous DCM (2 mL) at 40 °C for 12 h under  $\text{N}_2$  atmosphere. Then the reaction mixture was added dropwise to the solution of piperidine (1.5 mmol, 127.8 mg) and  $\text{NEt}_3$  (4 mmol, 404.8 mg) in anhydrous DCM (1 mL) with ice-salt bath. The mixture was stirred at ambient temperature for 8 h, washed by 1M HCl (4 mL  $\times$  2) and brine (4 mL), dried over  $\text{Na}_2\text{SO}_4$ , and evaporated in vacuo. The residue was purified by flash chromatography on silica gel (petroleum ether/ethyl acetate = 20:1) to afford **46** (55.3 mg, 42%) as a white solid. The

ratio of  $^{16}\text{O}, ^{16}\text{O}$ -**46**: $^{16}\text{O}, ^{18}\text{O}$ -**46** was determined by ESI-HRMS as 3:1. The low  $^{18}\text{O}$ -labeled ratio may attribute to  $\text{H}_2\text{O}^{16}$  in reagents.

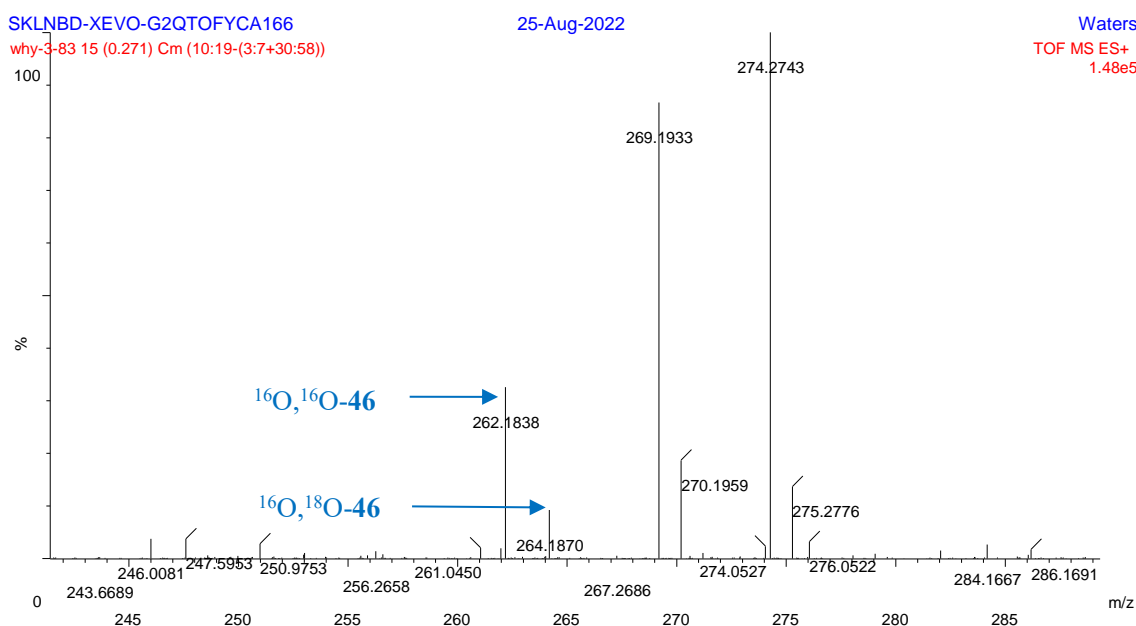

**Figure S1. Analysis of 46 by HRMS.**

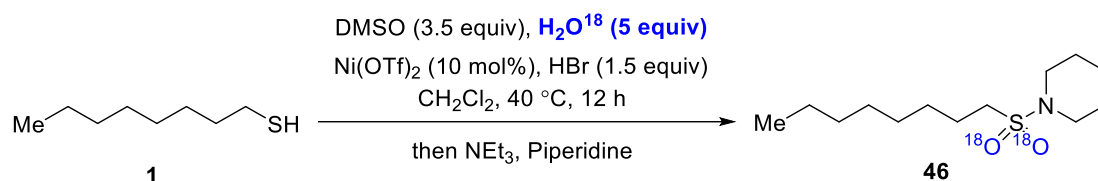

To a solution of Ni(OTf)<sub>2</sub> (0.05 mmol, 17.8 mg), octane-1-thiol (0.50 mmol, 73.1 mg), DMSO (1.75 mmol, 120  $\mu\text{L}$ ),  $\text{H}_2\text{O}^{18}$  (2.5 mmol, 45.0 mg) in DCM (2 mL), HBr (AcOH solution, 33% w/w, 0.75 mmol, 120  $\mu\text{L}$ ) was added at room temperature. The mixture was stirred in anhydrous DCM (2 mL) at 40 °C for 12 h under N<sub>2</sub> atmosphere. Then the reaction mixture was added dropwise to the solution of piperidine (1.5 mmol, 127.8 mg) and NEt<sub>3</sub> (4 mmol, 404.8 mg) in anhydrous DCM (1 mL) with ice-salt bath. The mixture was stirred at ambient temperature for 8 h, washed by 1N HCl (4 mL  $\times$  2) and brine (4 mL), dried over Na<sub>2</sub>SO<sub>4</sub>, and evaporated in vacuo. The residue was purified by flash chromatography on silica gel (petroleum ether/ethyl acetate = 20:1) to afford **46** (73.0 mg, 55%) as a white solid. The ratio of  $^{16}\text{O}, ^{16}\text{O}$ -**46** :  $^{16}\text{O}, ^{18}\text{O}$ -**46** :  $^{18}\text{O}, ^{18}\text{O}$ -**46** was determined by ESI-HRMS as 10:9:2.

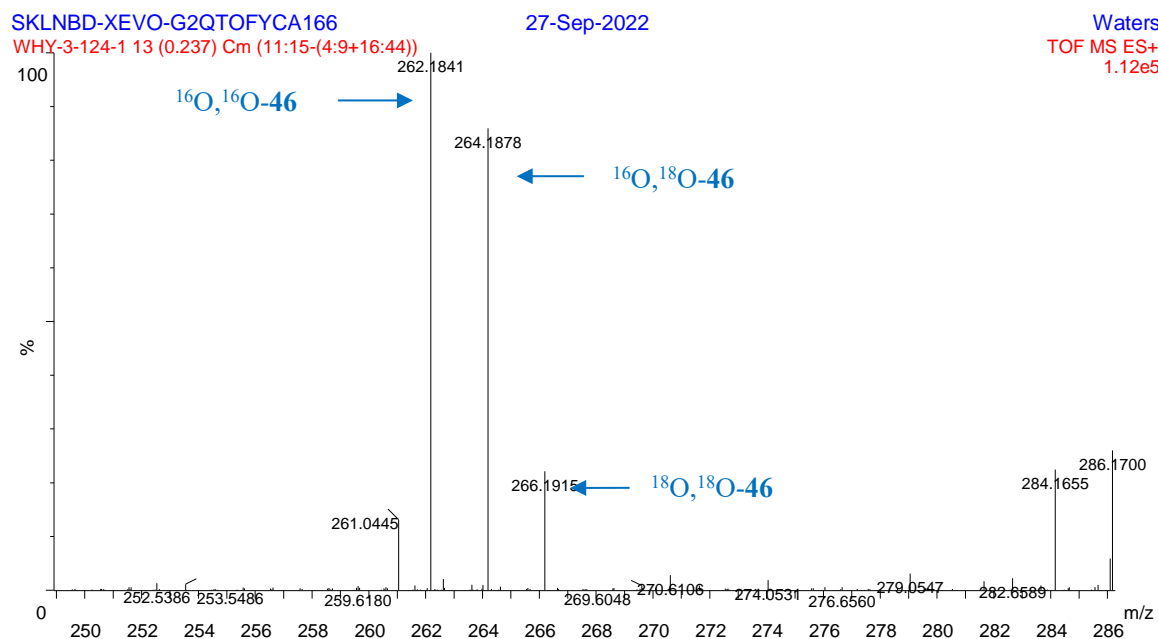

**Figure S2. Analysis of 46 by HRMS.**

(2) The kinetic experiments

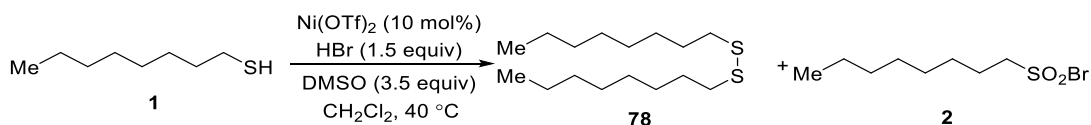

To a solution of  $\text{Ni}(\text{OTf})_2$  (0.05 mmol, 17.8 mg), octane-1-thiol **1** (0.50 mmol, 73.1 mg), DMSO (1.75 mmol, 120  $\mu\text{L}$ ) in anhydrous DCM (2 mL), HBr (AcOH solution, 33% w/w, 0.75 mmol, 120  $\mu\text{L}$ ) was added at room temperature. The mixture was stirred at 40  $^\circ\text{C}$  for desired time. After cooling down to room temperature, the reaction mixture was filtered over a short pad of silica gel by a mixture of hexane and ethyl acetate (10:1). The filtrate was dried over  $\text{Na}_2\text{SO}_4$  and evaporated in vacuo to afford the crude product. 1,1,2,2-Tetrachloroethane (33.5 mg) was added into the crude product as internal standard to determine the yield by  $^1\text{H-NMR}$ . 0.200 Mmol (40%) of **2** and 0.137 mmol (55%) of **77** were detected in 1 h. 0.250 Mmol (50%) of **2** and 0.110 mmol (44%) of **78** were afforded in 2 h. 0.410 Mmol (82%) of **2** and 0.030 mmol (12%) of **78** were afforded in 8 h.

(3) Control experiments

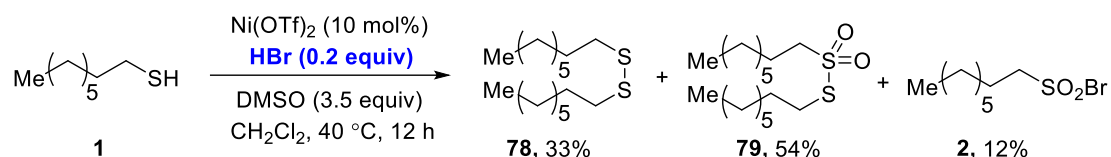

To a solution of Ni(OTf)<sub>2</sub> (0.05 mmol, 17.8 mg), octane-1-thiol **1** (0.50 mmol, 73.1 mg), DMSO (1.75 mmol, 120 μL) in anhydrous DCM (2 mL), HBr (AcOH solution, 33% w/w, 0.01 mmol, 16 μL) was added at room temperature. The mixture was stirred at 40 °C for 12 h. After cooling down to room temperature, the reaction mixture was filtered over a short pad of silica gel by a mixture of hexane and ethyl acetate (10:1). The filtrate was dried over Na<sub>2</sub>SO<sub>4</sub> and evaporated in vacuo to afford the crude product. 1,1,2,2-Tetrachloroethane (33.5 mg) was added into the crude product as internal standard to determine the yield by <sup>1</sup>H-NMR. 0.100 Mmol (12%) of **2**, 0.082 mmol (33%) of **78**, and 0.135 mmol (54%) of **79** were detected.

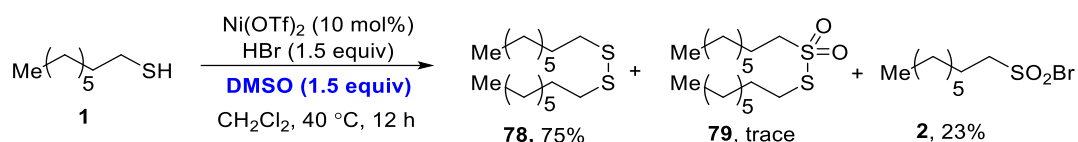

To a solution of Ni(OTf)<sub>2</sub> (0.05 mmol, 17.8 mg), octane-1-thiol **1** (0.50 mmol, 73.1 mg), DMSO (0.75 mmol, 52 μL) in anhydrous DCM (2 mL), HBr (AcOH solution, 33% w/w, 0.01 mmol, 16 μL) was added at room temperature. The mixture was stirred at 40 °C for 12 h. After cooling down to room temperature, the reaction mixture was filtered over a short pad of silica gel by a mixture of hexane and ethyl acetate (10:1). The filtrate was dried over Na<sub>2</sub>SO<sub>4</sub> and evaporated in vacuo to afford the crude product. 1,1,2,2-Tetrachloroethane (33.5 mg) was added into the crude product as internal standard to determine the yield by <sup>1</sup>H-NMR. 0.115 mmol (23%) of **2** and 0.187 mmol (75%) of **78** were detected.

#### (4) Intermediate characterization

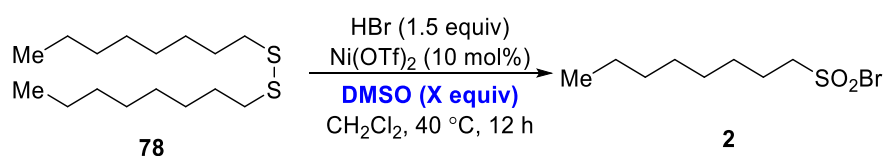

To a solution of Ni(OTf)<sub>2</sub> (0.05 mmol, 17.8 mg), 1,2-dioctyldisulfane **78** (0.25 mmol, 72.6 mg), different equiv. of DMSO in anhydrous DCM (2 mL), HBr (AcOH solution, 33% w/w, 0.75 mmol, 120 μL) was added at room temperature. The mixture was stirred with at 40 °C for 12 h. After cooling down to room temperature, the reaction mixture was filtered over a short pad of silica gel by a mixture of hexane and ethyl acetate (10:1). The filtrate was dried over Na<sub>2</sub>SO<sub>4</sub> and evaporated in vacuo to afford the crude product. 1,1,2,2-Tetrachloroethane (33.5 mg) was added into the crude product as internal standard to determine the yield by <sup>1</sup>H-NMR. Only 0.250 mmol (100%) of **78** was detected without DMSO. 0.130 Mmol (26%) of **2** and 0.167 mmol (67%) of **78** were detected with 1 equiv. of DMSO (0.5 mmol, 34 μL). 0.295 Mmol of **2** (59%) and 0.082 mmol (33%) of **78** were detected with 2 equiv. of DMSO (1.0 mmol, 68 μL). 0.340 Mmol (68%) of **2** and 0.062 mmol (25%) of **78** were detected with 3 equiv. of DMSO (1.5 mmol, 103 μL).

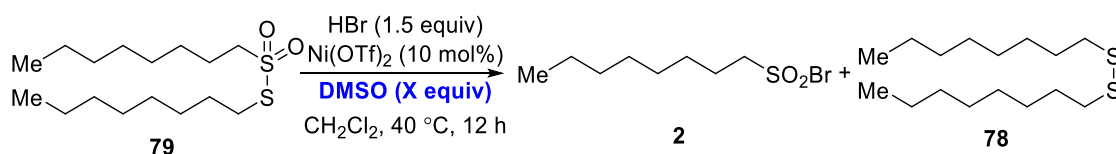

To a solution of Ni(OTf)<sub>2</sub> (0.05 mmol, 17.8 mg), *S*-octyl octane-1-sulfonothioate **79** (0.25 mmol, 80.65 mg), different equiv. of DMSO in anhydrous DCM (2 mL), HBr (AcOH solution, 33% w/w, 0.75 mmol, 120 μL) was added at room temperature. The mixture was stirred with at 40 °C for 12 h. After cooling down to room temperature, the reaction mixture was filtered over a short pad of silica gel by a mixture of hexane and ethyl acetate (10:1). The filtrate was dried over Na<sub>2</sub>SO<sub>4</sub> and evaporated in vacuo to afford the crude product. 1,1,2,2-Tetrachloroethane (33.5 mg) was added into the crude product as internal standard to determine the yield by <sup>1</sup>H-NMR. 0.155 Mmol (31%) of **2** and 0.115 mmol (46%) of **78** were detected without DMSO. 0.295 Mmol (59%) of **2** and 0.067 mmol (27%) of **78** were detected with 1 equiv. of DMSO (0.5 mmol, 34 μL). 0.375 Mmol of **2** (75%) and 0.040 mmol (16%) of **78** were detected with 2 equiv. of DMSO (1.0 mmol, 68 μL), 0.345 mmol (69%) of **2** and 0 mmol (0%) of **78** were detected with 3 equiv. of DMSO (1.5 mmol, 103 μL).

## Experimental Section

### 1) Materials preparation

**Method A:** Substrate for **8** was prepared according to literature<sup>1</sup>.

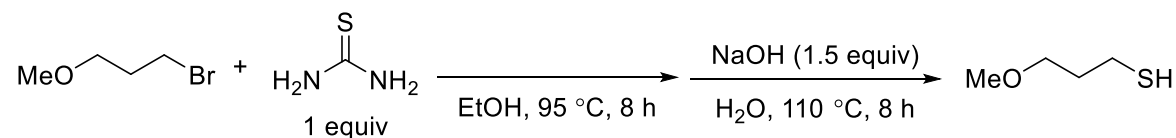

**Method B:** Substrate for **9** was prepared according to literature<sup>2</sup>.

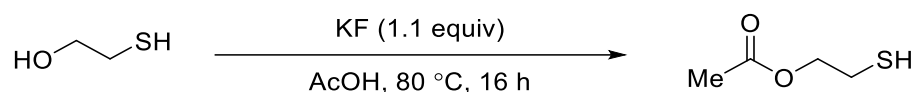

**Method C:** Substrate for **13** was prepared according to literature<sup>3</sup>.

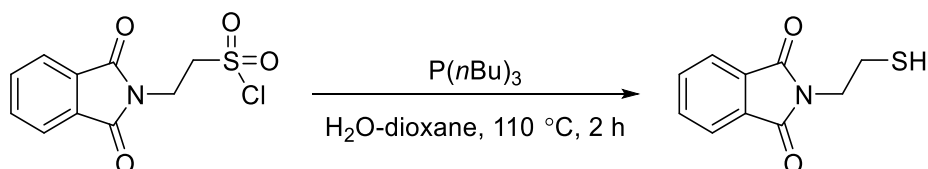

### 2) General procedure

#### Typical procedure for the oxidative bromination of primary thiols (**1, 3-6, 8-12, 17, 23-24, 26-27, 30-33, 37-38, 41**)

Ni(OTf)<sub>2</sub> (10 mol%, 17.8 mg, for **1,3-12,17**), thiol substrate (0.5 mmol), DMSO (3.5 equiv, 120  $\mu$ L) and anhydrous DCM (2 mL) were added into a reaction tube with a magnetic stir bar at room temperature, then HBr (AcOH solution, 33% w/w, 1.5 equiv, 120  $\mu$ L) was added. The reaction mixture was stirred at 40 °C under N<sub>2</sub> atmosphere until the full consumption of substrate monitored by TLC. The reaction mixture was filtered over a short pad of silica gel by a mixture of hexane and ethyl acetate (10:1). The filtrate was dried over Na<sub>2</sub>SO<sub>4</sub> and evaporated in vacuo to afford the product. Some products (**26-27,38**) were purified by chromatography on silica gel.

#### Typical procedure for the oxidative bromination of secondary thiols (**14-16**)

Ni(OTf)<sub>2</sub> (10 mol%, 17.8 mg), thiol substrate (0.5 mmol), DMSO (6.4 equiv, 220  $\mu$ L) and anhydrous DCM (2 mL) were added into a reaction tube with a magnetic stir bar at room temperature, then HBr (AcOH solution, 33% w/w, 2.5 equiv, 200  $\mu$ L) was added.

The reaction mixture was stirred at 40 °C under N<sub>2</sub> atmosphere until the full consumption of substrate monitored by TLC. The reaction mixture was filtered over a short pad of silica gel by a mixture of hexane and ethyl acetate (10:1). The filtrate was dried over Na<sub>2</sub>SO<sub>4</sub> and evaporated in vacuo to afford the product.

**Typical procedure for the oxidative bromination of aromatic thiols (7, 18-22, 25, 28-29, 34-36)**

Ni(OTf)<sub>2</sub> (10 mol%, 17.8 mg, for **18-21, 28, 34-35**), thiol substrate (0.5 mmol), DMSO (3.5 equiv, 120 μL) and anhydrous DCM (2 mL) were added into a reaction tube with a magnetic stir bar at room temperature, then HBr (AcOH solution, 33% w/w, 1.5 equiv, 120 μL) was added. The reaction mixture was stirred under 40 °C under N<sub>2</sub> atmosphere for 12 h. DMSO (1.2 equiv, 40 μL) and HBr (AcOH solution, 33% w/w, 0.5 equiv, 40 μL) were added next, the mixture was stirred until the full consumption of substrate monitored by TLC. The reaction mixture was filtered over a short pad of silica gel by a mixture of hexane and ethyl acetate (10:1). The filtrate was dried over Na<sub>2</sub>SO<sub>4</sub> and evaporated in vacuo to afford the product.

**Typical procedure for the oxidative bromination of thiols with HBr sensitive groups (13, 39-40)**

Ni(OTf)<sub>2</sub> (10 mol%, 17.8 mg, for **13**), thiol substrate (0.5 mmol), DMSO (3.5 equiv, 120 μL) and EA (2 mL) were added into a reaction tube with a magnetic stir bar at room temperature, then HBr (Aqueous, 48% w/w, 1.5 equiv, 84 μL) was added. The reaction mixture was stirred under 40 °C until the full consumption of substrate monitored by TLC. The reaction mixture was filtered over a short pad of silica gel by a mixture of hexane and ethyl acetate (10:1). The filtrate was dried over Na<sub>2</sub>SO<sub>4</sub> and evaporated in vacuo to afford the product.

**Typical procedure for the one-pot synthesis of sulfonyl derivatives**

Ni(OTf)<sub>2</sub> (10 mol%, 17.8 mg), thiol substrate (0.5 mmol), DMSO (3.5 equiv, 120 μL) and anhydrous DCM (2 mL) were added into a reaction tube with a magnetic stir bar at room temperature, then HBr (AcOH solution, 33% w/w, 1.5 equiv, 120 μL) was added.



The reaction mixture was stirred at 40 °C under N<sub>2</sub> atmosphere until the full consumption of substrate monitored by TLC.

**For sulfonamide:** The reaction mixture was added dropwise to a solution of amine (3 equiv) and NEt<sub>3</sub> (4 mmol, 404 mg) in DCM (1 mL) with ice-salt bath under N<sub>2</sub> atmosphere, then stirred at ambient temperature for 8 h. The resulting solution was washed by 1N HCl (4 mL × 2) and brine (4 mL), dried over Na<sub>2</sub>SO<sub>4</sub>, and evaporated in vacuo. The residue was purified by chromatography on a silica gel (petroleum ether/ethyl acetate) to afford the corresponding sulfonamides.

**For sulfonate:** The reaction mixture was added dropwise to a solution of alcohol (3 equiv) and NEt<sub>3</sub> (4 mmol, 404 mg) in DCM (1 mL) with ice-salt bath, then stirred at ambient temperature for 8 h. The resulting solution was washed by water (4 mL × 2) and brine (4 mL), dried over Na<sub>2</sub>SO<sub>4</sub>, and evaporated in vacuo. The residue was purified by chromatography on a silica gel (petroleum ether/ethyl acetate) to afford the corresponding sulfonamides.

**For sulfonyl fluoride:** The reaction mixture was added dropwise to a solution of tetrabutylammonium fluoride (TBAF) (5 equiv, 653.7 mg) and NEt<sub>3</sub> (3.5 mmol, 353.5 mg) in DCM (1 mL) with ice-salt bath, then stirred at ambient temperature for 8 h. The resulting solution was filtered over a short pad of silica gel by a mixture of hexane and ethyl acetate (10:1). The filtrate was dried over Na<sub>2</sub>SO<sub>4</sub> and evaporated in vacuo to afford the corresponding sulfonyl fluoride.

**For sulfonyl azide:** The reaction mixture was added dropwise to a solution of TMSN<sub>3</sub> (3 equiv, 172.8 mg) and NEt<sub>3</sub> (4 mmol, 404 mg) in DCM (1 mL) with ice-salt bath, then stirred at ambient temperature for 8 h. The resulting solution was washed by water (4 mL × 2) and brine (4 mL), dried over Na<sub>2</sub>SO<sub>4</sub>, and evaporated in vacuo. The residue was purified by chromatography on a silica gel (petroleum ether/ethyl acetate) to afford the corresponding sulfonyl azide.

### **Typical procedure for the gram-scale synthesis of 18**

Ni(OTf)<sub>2</sub> (10 mol%, 356.8 mg), 4-methylbenzenethiol (10 mmol), DMSO (3.5 equiv, 2.4 mL) and anhydrous DCM (40 mL) were added into a round-bottom flask with a magnetic stir bar at room temperature, then HBr (AcOH solution, 33% w/w, 1.5 equiv, 2.4 mL) was added. The flask was equipped with a condenser, then the reaction mixture was stirred under 40 °C for 12 h. DMSO (1.2 equiv, 0.8 mL) and HBr (AcOH solution, 33% w/w, 0.5 equiv, 0.8 mL) were added next, the mixture was stirred until the full consumption of substrate monitored by TLC. The reaction mixture was diluted with water (20 mL) and extracted with DCM (20 mL × 2). The combined organic extracts were washed with a saturated solution of NaCl (20 mL), dried over Na<sub>2</sub>SO<sub>4</sub>, and evaporated in vacuo. The residue was filtrated over a short pad of silica gel by a mixture of hexane and ethyl acetate (10:1), and the filtrate was evaporated in vacuo to afford the product (1.69 g, 72%).

#### Procedure for one-pot synthesis of pharmaceutical intermediate 77

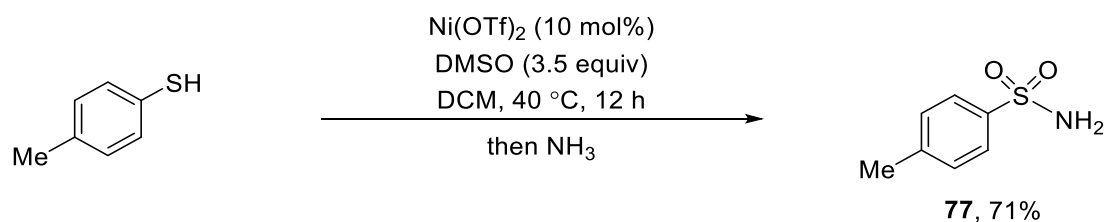

Ni(OTf)<sub>2</sub> (10 mol%, 16.84 mg), 4-methylbenzenethiol (0.5 mmol), DMSO (3.5 equiv, 120 μL) and anhydrous DCM (2 mL) were added into a reaction tube with a magnetic stir bar at room temperature, then HBr (AcOH solution, 33% w/w, 1.5 equiv, 120 μL) was added. The reaction mixture was stirred under 40 °C under N<sub>2</sub> atmosphere for 12 h. DMSO (1.2 equiv, 40 μL) and HBr (AcOH solution, 33% w/w, 0.5 equiv, 40 μL) were added next, the mixture was stirred until the full consumption of substrate monitored by TLC. The reaction mixture was filtered over a short pad of silica gel by a mixture of hexane and ethyl acetate (10:1). The filtrate was evaporated in vacuo. The residue and NEt<sub>3</sub> (1.2 equiv, 60.7 mg) was dissolved in DCM (2 mL), then NH<sub>3</sub> was bubbled into the solution in ice-salt bath for 1 h. The resulting solution was washed by water (2 mL × 2) and brine (2 mL), dried over Na<sub>2</sub>SO<sub>4</sub>, and evaporated in vacuo.

The residue was purified by chromatography on a silica gel (petroleum ether/ethyl acetate = 4:1) to afford the product (60.8 mg, 71%).

#### Analytical Data for Products

##### octane-1-sulfonyl bromide (**2**)<sup>4</sup> :

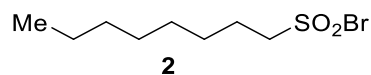

The reaction of octane-1-thiol (0.50 mmol, 73.1 mg), DMSO (1.75 mmol, 120  $\mu$ L), HBr (AcOH solution, 33% w/w, 0.75 mmol, 120  $\mu$ L), Ni(OTf)<sub>2</sub> (0.05 mmol, 17.8 mg) in DCM (2 mL) at 40 °C for 12 h afforded 110.6 mg (86%) of **2** as a colorless oil.

**<sup>1</sup>H NMR (400 MHz, CDCl<sub>3</sub>):**  $\delta$  3.73 (t,  $J$  = 7.6 Hz, 2H), 2.05 – 1.96 (m, 2H), 1.53 – 1.44 (m, 2H), 1.38 – 1.24 (m, 8H), 0.88 (t,  $J$  = 6.9 Hz, 3H).

**<sup>13</sup>C NMR (101 MHz, CDCl<sub>3</sub>):**  $\delta$  69.7, 31.6, 28.86, 28.82, 27.2, 24.6, 22.5, 14.0.

##### butane-1-sulfonyl bromide (**3**)<sup>5</sup> :

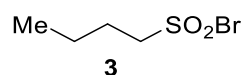

The reaction of butane-1-thiol (0.50 mmol, 45.1 mg), DMSO (1.75 mmol, 120  $\mu$ L), HBr (AcOH solution, 33% w/w, 0.75 mmol, 120  $\mu$ L), Ni(OTf)<sub>2</sub> (0.05 mmol, 17.8 mg) in DCM (2 mL) at 40 °C for 12 h afforded 81.4 mg (81%) of **3** as a colorless oil.

**<sup>1</sup>H NMR (400 MHz, CDCl<sub>3</sub>):**  $\delta$  3.74 (t,  $J$  = 8.0 Hz, 2H), 2.05 – 1.96 (m, 2H), 1.60 – 1.49 (m, 2H), 1.01 (t,  $J$  = 7.4 Hz, 3H).

**<sup>13</sup>C NMR (101 MHz, CDCl<sub>3</sub>):**  $\delta$  69.3, 26.5, 20.6, 13.4.

##### pentane-1-sulfonyl bromide (**4**) :

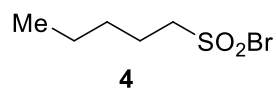

The reaction of pentane-1-thiol (0.50 mmol, 52.1 mg), DMSO (1.75 mmol, 120  $\mu$ L), HBr (AcOH solution, 33% w/w, 0.75 mmol, 120  $\mu$ L), Ni(OTf)<sub>2</sub> (0.05 mmol, 17.8 mg) in DCM (2 mL) at 40 °C for 12 h afforded 83.9 mg (78%) of **4** as a colorless oil.

**<sup>1</sup>H NMR (400 MHz, CDCl<sub>3</sub>):**  $\delta$  3.73 (t,  $J$  = 7.6 Hz, 2H), 2.06 – 1.97 (m, 2H), 1.52 – 1.34 (m, 4H), 0.94 (t,  $J$  = 7.2 Hz, 3H).

$^{13}\text{C}$  NMR (101 MHz,  $\text{CDCl}_3$ ):  $\delta$  69.6, 29.2, 24.2, 21.9, 13.5.

**2-phenylethane-1-sulfonyl bromide (5) :**

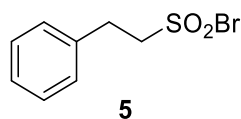

The reaction of 2-phenylethane-1-thiol (0.50 mmol, 69.1 mg), DMSO (1.75 mmol, 120  $\mu\text{L}$ ), HBr (AcOH solution, 33% w/w, 0.75 mmol, 120  $\mu\text{L}$ ),  $\text{Ni}(\text{OTf})_2$  (0.05 mmol, 17.8 mg) in DCM (2 mL) at 40  $^\circ\text{C}$  for 12 h afforded 99.6 mg (80%) of **4** as a white solid.

$^1\text{H}$  NMR (400 MHz,  $\text{CDCl}_3$ ):  $\delta$  7.40 (t,  $J = 7.4$  Hz, 2H), 7.33 (t,  $J = 6.9$  Hz, 1H), 7.28 (d,  $J = 7.4$  Hz, 2H), 4.04 – 3.97 (m, 2H), 3.38 – 3.32 (m, 2H).

$^{13}\text{C}$  NMR (101 MHz,  $\text{CDCl}_3$ ):  $\delta$  135.2, 129.0, 128.5, 127.5, 70.1, 30.6.

HRMS  $m/z$  (EI) calcd for  $\text{C}_8\text{H}_9\text{Br} [\text{M}-\text{SO}_2]^+$  183.9888, found: 183.9881.

**2-ethylhexane-1-sulfonyl bromide (6) :**

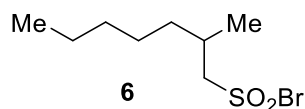

The reaction of 2-ethylhexane-1-thiol (0.50 mmol, 73.2 mg), DMSO (1.75 mmol, 120  $\mu\text{L}$ ), HBr (AcOH solution, 33% w/w, 0.75 mmol, 120  $\mu\text{L}$ ),  $\text{Ni}(\text{OTf})_2$  (0.05 mmol, 17.8 mg) in DCM (2 mL) at 40  $^\circ\text{C}$  for 12 h afforded 90.1 mg (78%) of **4** as a colorless oil.

$^1\text{H}$  NMR (400 MHz,  $\text{CDCl}_3$ ):  $\delta$  3.78 (d,  $J = 6.0$  Hz, 2H), 2.21 – 2.13 (m, 1H), 1.63 – 1.55 (m, 2H), 1.55 – 1.47 (m, 2H), 1.34 – 1.28 (m, 4H), 0.98 – 0.85 (m, 6H).

$^{13}\text{C}$  NMR (101 MHz,  $\text{CDCl}_3$ ):  $\delta$  74.3, 36.6, 31.7, 28.0, 25.1, 22.5, 13.9, 10.1.

**methyl 3-(bromosulfonyl)propanoate (7) :**

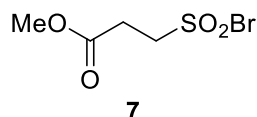

The reaction of methyl 3-mercaptopropanoate (0.50 mmol, 60.1 mg), DMSO (2.3 mmol, 160  $\mu\text{L}$ ), HBr (AcOH solution, 33% w/w, 1 mmol, 160  $\mu\text{L}$ ),  $\text{Ni}(\text{OTf})_2$  (0.05 mmol, 17.8 mg) in DCM (2 mL) at 40  $^\circ\text{C}$  for 12 h, followed by adding DMSO (0.55 mmol, 40  $\mu\text{L}$ )

and HBr (AcOH solution, 33% w/w, 0.25 mmol, 40 $\mu$ L) at 40 °C for 4 h afforded 66.9 mg (58%) of **7** as a colorless oil.

**<sup>1</sup>H NMR (400 MHz, CDCl<sub>3</sub>):**  $\delta$  4.06 (t,  $J$  = 7.6 Hz, 2H), 3.76 (s, 3H), 3.01 (t,  $J$  = 7.6 Hz, 2H).

**<sup>13</sup>C NMR (101 MHz, CDCl<sub>3</sub>):**  $\delta$  168.8, 63.9, 52.7, 29.1.

### 3-methoxypropane-1-sulfonyl bromide (**8**):

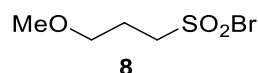

The reaction of 3-methoxypropane-1-thiol (0.50 mmol, 53.1 mg), DMSO (1.75 mmol, 120  $\mu$ L), HBr (AcOH solution, 33% w/w, 0.75 mmol, 120  $\mu$ L), Ni(OTf)<sub>2</sub> (0.05 mmol, 17.8 mg) in DCM (2 mL) at 40 °C for 12 h afforded 94.4 mg (87%) of **8** as colorless oil.

**<sup>1</sup>H NMR (400 MHz, CDCl<sub>3</sub>):**  $\delta$  3.86 (t,  $J$  = 7.6 Hz, 2H), 3.54 (t,  $J$  = 5.7 Hz, 2H), 3.35 (s, 3H), 2.30 – 2.21 (m, 2H).

**<sup>13</sup>C NMR (101 MHz, CDCl<sub>3</sub>):**  $\delta$  68.6, 66.8, 58.7, 25.1.

### 2-(bromosulfonyl)ethyl acetate (**9**) :

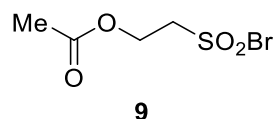

The reaction of 2-mercaptoethyl acetate (0.50 mmol, 60.1 mg), DMSO (1.75 mmol, 120  $\mu$ L), HBr (AcOH solution, 33% w/w, 0.75 mmol, 120  $\mu$ L), Ni(OTf)<sub>2</sub> (0.05 mmol, 17.8 mg) in DCM (2 mL) at 40 °C for 6 h afforded 72.7 mg (63%) of **9** as colorless oil.

**<sup>1</sup>H NMR (400 MHz, CDCl<sub>3</sub>):**  $\delta$  4.58 (t,  $J$  = 5.8 Hz, 2H), 4.09 (t,  $J$  = 5.8 Hz, 2H), 2.11 (s, 3H).

**<sup>13</sup>C NMR (101 MHz, CDCl<sub>3</sub>):**  $\delta$  170.2, 67.2, 57.5, 20.5.

### 2-methylpropane-1-sulfonyl bromide (**10**)<sup>6</sup> :

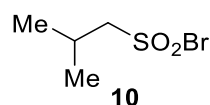

The reaction of 2-methylpropane-1-thiol (0.50 mmol, 45.1 mg), DMSO (1.75 mmol, 120  $\mu$ L), HBr (AcOH solution, 33% w/w, 0.75 mmol, 120  $\mu$ L), Ni(OTf)<sub>2</sub> (0.05 mmol, 17.8 mg) in DCM (2 mL) at 40 °C for 12 h afforded 59.3 mg (76%) of **10** as a colorless oil.

<sup>1</sup>H NMR (400 MHz, CDCl<sub>3</sub>):  $\delta$  3.76 (d,  $J$  = 6.4 Hz, 2H), 2.58 – 2.46 (m, 1H), 1.19 (d,  $J$  = 6.8 Hz, 6H).

<sup>13</sup>C NMR (101 MHz, CDCl<sub>3</sub>):  $\delta$  77.9, 26.4, 21.8.

**3-methylbutane-1-sulfonyl bromide (11) :**

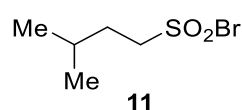

The reaction of 3-methylbutane-1-thiol (0.50 mmol, 52.1 mg), DMSO (1.75 mmol, 120  $\mu$ L), HBr (AcOH solution, 33% w/w, 0.75 mmol, 120  $\mu$ L), Ni(OTf)<sub>2</sub> (0.05 mmol, 17.8 mg) in DCM (2 mL) at 40 °C for 12 h afforded 57.1 mg (70%) of **11** as a colorless oil.

<sup>1</sup>H NMR (400 MHz, CDCl<sub>3</sub>):  $\delta$  3.78 – 3.70 (m, 2H), 1.95 – 1.86 (m, 2H), 1.85 – 1.73 (m, 1H), 0.99 (d,  $J$  = 6.6 Hz, 6H).

<sup>13</sup>C NMR (101 MHz, CDCl<sub>3</sub>):  $\delta$  68.2, 32.8, 26.6, 22.0.

**(4-chlorophenyl)methanesulfonyl bromide (12)<sup>7</sup> :**

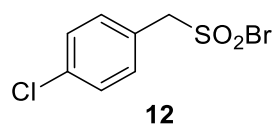

The reaction of (4-chlorophenyl)methanethiol (0.50 mmol, 79.0 mg), DMSO (1.75 mmol, 120  $\mu$ L), HBr (AcOH solution, 33% w/w, 0.75 mmol, 120  $\mu$ L), Ni(OTf)<sub>2</sub> (0.05 mmol, 17.8 mg) in DCM (2 mL) at 40 °C for 12 h afforded 56.6 mg (42%) of **12** as a colorless oil.

<sup>1</sup>H NMR (400 MHz, CDCl<sub>3</sub>):  $\delta$  7.44 (s, 4H), 4.91 (s, 2H).

<sup>13</sup>C NMR (101 MHz, CDCl<sub>3</sub>):  $\delta$  136.8, 132.8, 129.5, 124.9, 73.9.

**2-(1,3-dioxoisindolin-2-yl)ethane-1-sulfonyl bromide (13) :**

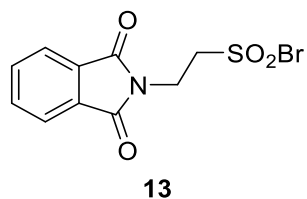

The reaction of 2-(2-mercaptoethyl)isoindoline-1,3-dione (0.50 mmol, 103.6 mg), DMSO (1.75 mmol, 120  $\mu$ L), HBr (Aqueous, 48% w/w, 0.75 mmol, 84  $\mu$ L), Ni(OTf)<sub>2</sub> (0.05 mmol, 17.8 mg) in DCM (2 mL) at 40 °C for 12 h afforded 119.3 mg (75%) of **13** as a white solid.

**<sup>1</sup>H NMR (400 MHz, CDCl<sub>3</sub>):**  $\delta$  7.89 (dd,  $J$  = 5.4, 3.1 Hz, 2H), 7.76 (dd,  $J$  = 5.5, 3.1 Hz, 2H), 4.32 (t,  $J$  = 6.5 Hz, 2H), 4.15 (t,  $J$  = 6.5 Hz, 2H).

**<sup>13</sup>C NMR (101 MHz, CDCl<sub>3</sub>):**  $\delta$  167.3, 134.5, 131.6, 123.7, 65.0, 32.9.

**cyclohexanesulfonyl bromide (14)<sup>4</sup> :**

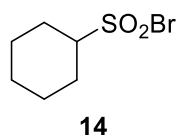

The reaction of cyclohexanethiol (0.50 mmol, 83.1 mg), DMSO (3.2 mmol, 220  $\mu$ L), HBr (AcOH solution, 33% w/w, 1.25 mmol, 200  $\mu$ L), Ni(OTf)<sub>2</sub> (0.05 mmol, 17.8 mg) in DCM (2 mL) at 40 °C for 12 h afforded 93.1 mg (82%) of **14** as a colorless oil.

**<sup>1</sup>H NMR (400 MHz, CDCl<sub>3</sub>):**  $\delta$  3.49 (tt,  $J$  = 11.9, 3.5 Hz, 1H), 2.49 – 2.34 (m, 2H), 2.02 – 1.95 (m, 2H), 1.77 – 1.67 (m, 3H), 1.46 – 1.22 (m, 3H).

**<sup>13</sup>C NMR (101 MHz, CDCl<sub>3</sub>):**  $\delta$  78.8, 27.5, 24.9, 24.8.

**cyclopentanesulfonyl bromide (15) :**

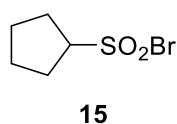

The reaction of cyclopentanethiol (0.50 mmol, 61.1 mg), DMSO (3.2 mmol, 220  $\mu$ L), HBr (AcOH solution, 33% w/w, 1.25 mmol, 200  $\mu$ L), Ni(OTf)<sub>2</sub> (0.05 mmol, 17.8 mg) in DCM (2 mL) at 40 °C for 12 h afforded 66.2 mg (77%) of **15** as colorless oil.

**<sup>1</sup>H NMR (400 MHz, CDCl<sub>3</sub>):**  $\delta$  4.14 (ddd,  $J$  = 15.0, 8.7, 6.4 Hz, 1H), 2.28 – 2.11 (m, 4H), 1.98 – 1.86 (m, 2H), 1.81 – 1.68 (m, 2H).

$^{13}\text{C}$  NMR (101 MHz,  $\text{CDCl}_3$ ):  $\delta$  79.3, 29.2, 25.6.

**3-methylbutane-2-sulfonyl bromide (16) :**

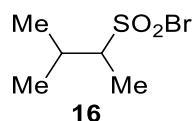

The reaction of 3-methylbutane-2-thiol (0.50 mmol, 52.1 mg), DMSO (3.2 mmol, 220  $\mu\text{L}$ ), HBr (AcOH solution, 33% w/w, 1.25 mmol, 200  $\mu\text{L}$ ),  $\text{Ni}(\text{OTf})_2$  (0.05 mmol, 17.8 mg) in DCM (2 mL) at 40  $^\circ\text{C}$  for 12 h afforded 68.8 mg (64%) of **16** as a colorless oil.

$^1\text{H}$  NMR (400 MHz,  $\text{CDCl}_3$ ):  $\delta$  3.77 – 3.69 (m, 1H), 2.77 – 2.63 (m, 1H), 1.52 (d,  $J$  = 7.0 Hz, 3H), 1.09 (dd,  $J$  = 6.9, 3.6 Hz, 6H).

$^{13}\text{C}$  NMR (101 MHz,  $\text{CDCl}_3$ ):  $\delta$  82.7, 29.1, 21.2, 17.1, 10.4.

**2-((4-methylphenyl)sulfonamido)ethane-1-sulfonyl bromide (17) :**

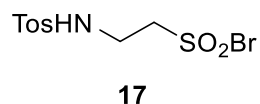

The reaction of *N*-(2-mercaptoethyl)-4-methylbenzenesulfonamide (0.50 mmol, 115.5 mg), DMSO (1.75 mmol, 120  $\mu\text{L}$ ), HBr (AcOH solution, 33% w/w, 0.75 mmol, 120  $\mu\text{L}$ ),  $\text{Ni}(\text{OTf})_2$  (0.05 mmol, 17.8 mg) in DCM (2 mL) at 40  $^\circ\text{C}$  for 12 h afforded 90.7 mg (53%) of **17** as a white solid.

$^1\text{H}$  NMR (400 MHz,  $\text{CDCl}_3$ ):  $\delta$  7.75 (d,  $J$  = 8.2 Hz, 2H), 7.34 (d,  $J$  = 8.1 Hz, 2H), 5.54 (t,  $J$  = 6.0 Hz, 1H), 3.96 (t,  $J$  = 6.2 Hz, 2H), 3.53 (q,  $J$  = 6.1 Hz, 2H), 2.43 (s, 3H).

$^{13}\text{C}$  NMR (101 MHz,  $\text{CDCl}_3$ ):  $\delta$  144.3, 135.9, 130.0, 127.0, 68.2, 38.0, 21.5.

**4-methylbenzenesulfonyl bromide (18)<sup>4</sup> :**

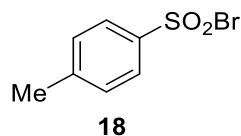

The reaction of 4-methylbenzenethiol (0.50 mmol, 62.1 mg), DMSO (1.75 mmol, 120  $\mu\text{L}$ ), HBr (AcOH solution, 33% w/w, 0.75 mmol, 120  $\mu\text{L}$ ),  $\text{Ni}(\text{OTf})_2$  (0.05 mmol, 17.8



mg) in DCM (2 mL) at 40 °C for 12 h, followed by adding DMSO (0.55 mmol, 40  $\mu$ L) and HBr (AcOH solution, 33% w/w, 0.25 mmol, 40 $\mu$ L) at 40 °C for 4 h afforded 90.4 mg (80%) of **18** as a white solid.

**<sup>1</sup>H NMR (400 MHz, CDCl<sub>3</sub>):**  $\delta$  7.87 (d,  $J$  = 8.4 Hz, 2H), 7.39 (d,  $J$  = 8.3 Hz, 2H), 2.48 (s, 3H).

**<sup>13</sup>C NMR (101 MHz, CDCl<sub>3</sub>):**  $\delta$  146.7, 144.5, 130.0, 126.4, 21.7.

**4-(tert-butyl)benzenesulfonyl bromide (19)<sup>5</sup> :**

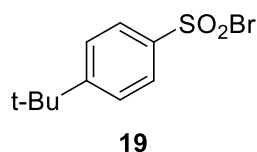

The reaction of 4-(tert-butyl)benzenethiol (0.50 mmol, 83.2 mg), DMSO (1.75 mmol, 120  $\mu$ L), HBr (AcOH solution, 33% w/w, 0.75 mmol, 120  $\mu$ L), Ni(OTf)<sub>2</sub> (0.05 mmol, 17.8 mg) in DCM (2 mL) at 40 °C for 12 h, followed by adding DMSO (0.55 mmol, 40  $\mu$ L) and HBr (AcOH solution, 33% w/w, 0.25 mmol, 40 $\mu$ L) at 40 °C for 4 h afforded 103.9 mg (75%) of **19** as a white solid.

**<sup>1</sup>H NMR (400 MHz, CDCl<sub>3</sub>):**  $\delta$  7.91 (d,  $J$  = 8.8 Hz, 2H), 7.61 (d,  $J$  = 8.7 Hz, 2H), 1.37 (s, 9H).

**<sup>13</sup>C NMR (101 MHz, CDCl<sub>3</sub>):**  $\delta$  159.5, 144.3, 126.5, 126.3, 35.5, 30.9.

**4-isopropylbenzenesulfonyl bromide (20)<sup>4</sup> :**

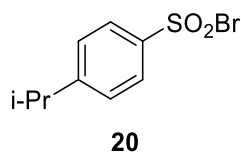

The reaction of 4-isopropylbenzenethiol (0.50 mmol, 76.1 mg), DMSO (1.75 mmol, 120  $\mu$ L), HBr (AcOH solution, 33% w/w, 0.75 mmol, 120  $\mu$ L), Ni(OTf)<sub>2</sub> (0.05 mmol, 17.8 mg) in DCM (2 mL) at 40 °C for 12 h, followed by adding DMSO (0.55 mmol, 40  $\mu$ L) and HBr (AcOH solution, 33% w/w, 0.25 mmol, 40 $\mu$ L) at 40 °C for 4 h afforded 86.8 mg (66%) of **20** as colorless oil.

**<sup>1</sup>H NMR (400 MHz, CDCl<sub>3</sub>):**  $\delta$  7.93 (d,  $J$  = 8.5 Hz, 2H), 7.47 (d,  $J$  = 8.5 Hz, 2H), 3.10 – 3.01 (m, 1H), 1.32 (d,  $J$  = 6.9 Hz, 6H).

$^{13}\text{C}$  NMR (101 MHz,  $\text{CDCl}_3$ ):  $\delta$  157.2, 144.6, 127.6, 126.6, 34.3, 23.4.

**4-methoxybenzenesulfonyl bromide (21)<sup>4</sup> :**

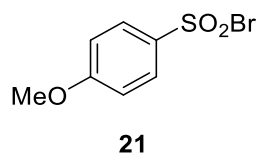

The reaction of 4-methoxybenzenethiol (0.50 mmol, 70.1 mg), DMSO (1.75 mmol, 120  $\mu\text{L}$ ), HBr (AcOH solution, 33% w/w, 0.75 mmol, 120  $\mu\text{L}$ ),  $\text{Ni}(\text{OTf})_2$  (0.05 mmol, 17.8 mg) in DCM (2 mL) at 40  $^\circ\text{C}$  for 12 h, followed by adding DMSO (0.55 mmol, 40  $\mu\text{L}$ ) and HBr (AcOH solution, 33% w/w, 0.25 mmol, 40  $\mu\text{L}$ ) at 40  $^\circ\text{C}$  for 4 h afforded 87.9 mg (70%) of **21** as colorless oil.

$^1\text{H}$  NMR (400 MHz,  $\text{CDCl}_3$ ):  $\delta$  7.93 (d,  $J = 9.0$  Hz, 2H), 7.03 (d,  $J = 9.0$  Hz, 2H), 3.92 (s, 3H).

$^{13}\text{C}$  NMR (101 MHz,  $\text{CDCl}_3$ ):  $\delta$  164.7, 139.1, 129.0, 114.5, 55.9.

**4-chlorobenzenesulfonyl bromide (22)<sup>4</sup> :**

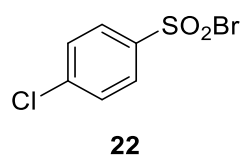

The reaction of 4-chlorobenzenethiol (0.50 mmol, 72.3 mg), DMSO (1.75 mmol, 120  $\mu\text{L}$ ), HBr (AcOH solution, 33% w/w, 0.75 mmol, 120  $\mu\text{L}$ ) in DCM (2 mL) at 40  $^\circ\text{C}$  for 12 h, followed by adding DMSO (0.55 mmol, 40  $\mu\text{L}$ ) and HBr (AcOH solution, 33% w/w, 0.25 mmol, 40  $\mu\text{L}$ ) at 40  $^\circ\text{C}$  for 4 h afforded 102.2 mg (80%) of **22** as a white solid.

$^1\text{H}$  NMR (400 MHz,  $\text{CDCl}_3$ ):  $\delta$  7.94 (d,  $J = 8.7$  Hz, 2H), 7.59 (d,  $J = 8.7$  Hz, 2H).

$^{13}\text{C}$  NMR (101 MHz,  $\text{CDCl}_3$ ):  $\delta$  145.3, 142.0, 129.8, 127.8.

**4-bromobenzenesulfonyl bromide (23)<sup>5</sup> :**

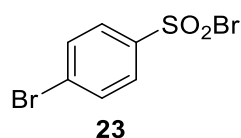

The reaction of 4-bromobenzenethiol (0.50 mmol, 94.6 mg), DMSO (1.75 mmol, 120  $\mu$ L), HBr (AcOH solution, 33% w/w, 0.75 mmol, 120  $\mu$ L) in DCM (2 mL) at 40 °C for 12 h afforded 88.5 mg (59%) of **23** as a yellow solid.

$^1\text{H NMR}$  (400 MHz,  $\text{CDCl}_3$ ):  $\delta$  7.86 (d,  $J$  = 8.8 Hz, 2H), 7.76 (d,  $J$  = 8.8 Hz, 2H).

$^{13}\text{C NMR}$  (101 MHz,  $\text{CDCl}_3$ ):  $\delta$  145.8, 132.9, 130.7, 127.8.

#### 4-fluorobenzenesulfonyl bromide (**24**)<sup>4</sup> :

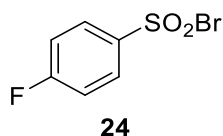

The reaction of 4-fluorobenzenethiol (0.50 mmol, 64.1 mg), DMSO (1.75 mmol, 120  $\mu$ L), HBr (AcOH solution, 33% w/w, 0.75 mmol, 120  $\mu$ L) in DCM (2 mL) at 40 °C for 12 h afforded 75.3 mg (63%) of **24** as a colorless oil.

$^1\text{H NMR}$  (400 MHz,  $\text{CDCl}_3$ ):  $\delta$  8.11 – 8.00 (m, 2H), 7.34 – 7.25 (m, 2H).

$^{13}\text{C NMR}$  (101 MHz,  $\text{CDCl}_3$ ):  $\delta$  166.2 (d,  $J$  = 261.5 Hz), 143.0 (d,  $J$  = 1.8 Hz), 129.5 (d,  $J$  = 10.1 Hz), 116.9 (d,  $J$  = 23.2 Hz).

$^{19}\text{F NMR}$  (376 MHz,  $\text{CDCl}_3$ ):  $\delta$  -99.56.

#### 4-(trifluoromethyl)benzenesulfonyl bromide (**25**)<sup>5</sup> :

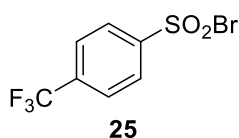

The reaction of 4-(trifluoromethyl)benzenethiol (0.50 mmol, 89.1 mg), DMSO (1.75 mmol, 120  $\mu$ L), HBr (AcOH solution, 33% w/w, 0.75 mmol, 120  $\mu$ L) in DCM (2 mL) at 40 °C for 12 h, followed by adding DMSO (0.55 mmol, 40  $\mu$ L) and HBr (AcOH solution, 33% w/w, 0.25 mmol, 40  $\mu$ L) at 40 °C for 4 h afforded 80.9 mg (56%) of **25** as a colorless oil.

$^1\text{H NMR}$  (400 MHz,  $\text{CDCl}_3$ ):  $\delta$  8.15 (d,  $J$  = 8.6 Hz, 2H), 7.90 (d,  $J$  = 8.6 Hz, 2H).

$^{13}\text{C NMR}$  (101 MHz,  $\text{CDCl}_3$ ):  $\delta$  149.5, 136.5 (q,  $J$  = 33.6 Hz), 127.0, 126.8 (q,  $J$  = 3.6 Hz), 122.6 (q,  $J$  = 274.4 Hz).

$^{19}\text{F NMR}$  (376 MHz,  $\text{CDCl}_3$ ):  $\delta$  -63.35.

**4-cyanobenzenesulfonyl bromide (26)<sup>8</sup> :**

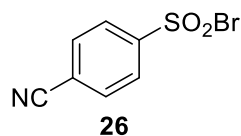

The reaction of 4-mercaptobenzonitrile (0.50 mmol, 67.6 mg), DMSO (1.75 mmol, 120  $\mu$ L), HBr (AcOH solution, 33% w/w, 0.75 mmol, 120  $\mu$ L) in DCM (2 mL) at 40 °C for 12 h afforded 22.1 mg (18%) of **26** as a white solid.

**<sup>1</sup>H NMR (400 MHz, CDCl<sub>3</sub>):**  $\delta$  8.12 (d,  $J$  = 8.6 Hz, 2H), 7.93 (d,  $J$  = 8.5 Hz, 2H).

**<sup>13</sup>C NMR (101 MHz, CDCl<sub>3</sub>):**  $\delta$  149.6, 133.4, 127.0, 118.7, 116.5.

**4-nitrobenzenesulfonyl bromide (27)<sup>5</sup> :**

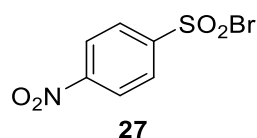

The reaction of 4-nitrobenzenethiol (0.50 mmol, 77.6 mg), DMSO (1.75 mmol, 120  $\mu$ L), HBr (AcOH solution, 33% w/w, 0.75 mmol, 120  $\mu$ L) in DCM (2 mL) at 40 °C for 12 h afforded 21.3 mg (16%) of **27** as a pale red solid.

**<sup>1</sup>H NMR (400 MHz, CDCl<sub>3</sub>):**  $\delta$  8.47 (d,  $J$  = 9.1 Hz, 2H), 8.21 (d,  $J$  = 9.1 Hz, 2H).

**<sup>13</sup>C NMR (101 MHz, CDCl<sub>3</sub>):**  $\delta$  150.8, 127.9, 124.9.

**3-methylbenzenesulfonyl bromide (28)<sup>9</sup> :**

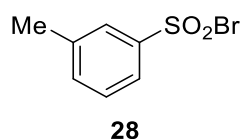

The reaction of 3-methylbenzenethiol (0.50 mmol, 62.1 mg), DMSO (1.75 mmol, 120  $\mu$ L), HBr (AcOH solution, 33% w/w, 0.75 mmol, 120  $\mu$ L), Ni(OTf)<sub>2</sub> (0.05 mmol, 17.8 mg) in DCM (2 mL) at 40 °C for 12 h, followed by adding DMSO (0.55 mmol, 40  $\mu$ L) and HBr (AcOH solution, 33% w/w, 0.25 mmol, 40  $\mu$ L) at 40 °C for 4 h afforded 82.3 mg (70%) of **28** as a colorless oil.

**<sup>1</sup>H NMR (400 MHz, CDCl<sub>3</sub>):**  $\delta$  7.80 (s, 2H), 7.56 – 7.45 (m, 2H), 2.49 (s, 3H).

**<sup>13</sup>C NMR (101 MHz, CDCl<sub>3</sub>):**  $\delta$  147.0, 140.1, 135.9, 129.3, 126.5, 123.5, 21.3.

### 3-chlorobenzenesulfonyl bromide (**29**)<sup>9</sup> :

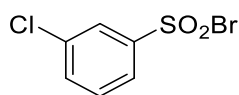

**29**

The reaction of 3-chlorobenzenethiol (0.50 mmol, 72.3 mg), DMSO (1.75 mmol, 120  $\mu$ L), HBr (AcOH solution, 33% w/w, 0.75 mmol, 120  $\mu$ L) in DCM (2 mL) at 40 °C for 12 h, followed by adding DMSO (0.55 mmol, 40  $\mu$ L) and HBr (AcOH solution, 33% w/w, 0.25 mmol, 40  $\mu$ L) at 40 °C for 4 h afforded 75.4 mg (59%) of **29** as a white solid.

**<sup>1</sup>H NMR (400 MHz, CDCl<sub>3</sub>):**  $\delta$  7.97 (s, 1H), 7.89 (d,  $J$  = 8.6 Hz, 1H), 7.71 (d,  $J$  = 8.8 Hz, 1H), 7.57 (t,  $J$  = 8.0 Hz, 1H).

**<sup>13</sup>C NMR (101 MHz, CDCl<sub>3</sub>):**  $\delta$  147.9, 135.5, 135.2, 130.8, 126.4, 124.5.

### 3-fluorobenzenesulfonyl bromide (**30**)<sup>10</sup> :

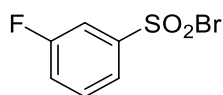

**30**

The reaction of 3-fluorobenzenethiol (0.50 mmol, 64.1 mg), DMSO (1.75 mmol, 120  $\mu$ L), HBr (AcOH solution, 33% w/w, 0.75 mmol, 120  $\mu$ L) in DCM (2 mL) at 40 °C for 12 h afforded 80.1 mg (67%) of **30** as a colorless oil.

**<sup>1</sup>H NMR (400 MHz, CDCl<sub>3</sub>):**  $\delta$  7.82 (d,  $J$  = 7.6 Hz, 1H), 7.70 (dt,  $J$  = 7.5, 2.0 Hz, 1H), 7.63 (td,  $J$  = 8.2, 5.2 Hz, 1H), 7.49 – 7.40 (m, 1H).

**<sup>13</sup>C NMR (101 MHz, CDCl<sub>3</sub>):**  $\delta$  161.8 (d,  $J$  = 255.5 Hz), 148.1 (d,  $J$  = 7.4 Hz), 131.3 (d,  $J$  = 8.1 Hz), 122.5 (d,  $J$  = 21.2 Hz), 122.2 (d,  $J$  = 3.0 Hz), 113.9 (d,  $J$  = 113.9 Hz).

**<sup>19</sup>F NMR (376 MHz, CDCl<sub>3</sub>):**  $\delta$  -107.19.

### 2-methoxybenzenesulfonyl bromide (**31**)<sup>8</sup> :

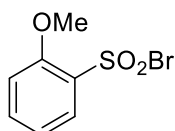

**31**

The reaction of 2-methoxybenzenethiol (0.50 mmol, 70.1 mg), DMSO (1.75 mmol, 120  $\mu$ L), HBr (AcOH solution, 33% w/w, 0.75 mmol, 120  $\mu$ L) in DCM (2 mL) at 40 °C for 12 h afforded 106.7 mg (85%) of **31** as a white solid.

**<sup>1</sup>H NMR (400 MHz, CDCl<sub>3</sub>):**  $\delta$  7.93 (d,  $J$  = 9.7 Hz, 1H), 7.71 (t,  $J$  = 8.7 Hz, 1H), 7.17 – 7.08 (m, 2H), 4.10 (s, 3H).

**<sup>13</sup>C NMR (101 MHz, CDCl<sub>3</sub>):**  $\delta$  157.1, 137.1, 134.2, 129.1, 120.0, 113.3, 56.5.

**2-fluorobenzenesulfonyl bromide (32)<sup>4</sup> :**

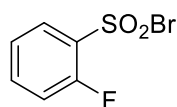

**32**

The reaction of 2-fluorobenzenethiol (0.50 mmol, 64.1 mg), DMSO (1.75 mmol, 120  $\mu$ L), HBr (AcOH solution, 33% w/w, 0.75 mmol, 120  $\mu$ L) in DCM (2 mL) at 40 °C for 12 h afforded 100.4 mg (84%) of **32** as colorless oil.

**<sup>1</sup>H NMR (400 MHz, CDCl<sub>3</sub>):**  $\delta$  7.97 – 7.89 (m, 1H), 7.80 – 7.72 (m, 1H), 7.39 – 7.29 (m, 2H).

**<sup>13</sup>C NMR (101 MHz, CDCl<sub>3</sub>):**  $\delta$  158.4 (d,  $J$  = 264.6 Hz), 137.6 (d,  $J$  = 8.1 Hz), 134.4 (d,  $J$  = 12.1 Hz), 128.7, 124.5 (d,  $J$  = 4.0 Hz), 118.2 (d,  $J$  = 20.2 Hz).

**<sup>19</sup>F NMR (376 MHz, CDCl<sub>3</sub>):**  $\delta$  -107.13.

**4-(methylthio)benzenesulfonyl bromide (33) :**

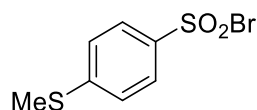

**33**

The reaction of 4-(methylthio)benzenethiol (0.50 mmol, 78.2 mg), DMSO (1.75 mmol, 120  $\mu$ L), HBr (AcOH solution, 33% w/w, 0.75 mmol, 120  $\mu$ L) in DCM (2 mL) at 40 °C for 12 h afforded 78.8 mg (59%) of **33** as a yellow solid.

**<sup>1</sup>H NMR (400 MHz, CDCl<sub>3</sub>):**  $\delta$  7.85 (d,  $J$  = 8.7 Hz, 2H), 7.34 (d,  $J$  = 8.7 Hz, 2H), 2.55 (s, 3H).

**<sup>13</sup>C NMR (101 MHz, CDCl<sub>3</sub>):**  $\delta$  149.9, 142.6, 126.6, 125.0, 14.6.

**2,4-dimethylbenzenesulfonyl bromide (34)<sup>4</sup> :**

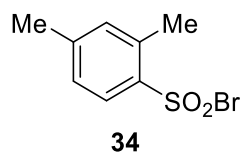

The reaction of 2,4-dimethylbenzenethiol (0.50 mmol, 69.1 mg), DMSO (1.75 mmol, 120  $\mu$ L), HBr (AcOH solution, 33% w/w, 0.75 mmol, 120  $\mu$ L), Ni(OTf)<sub>2</sub> (0.05 mmol, 17.8 mg) in DCM (2 mL) at 40 °C for 12 h, followed by adding DMSO (0.55 mmol, 40  $\mu$ L) and HBr (AcOH solution, 33% w/w, 0.25 mmol, 40  $\mu$ L) at 40 °C for 4 h afforded 95.9 mg (77%) of **34** as a colorless oil.

<sup>1</sup>H NMR (400 MHz, CDCl<sub>3</sub>):  $\delta$  7.88 (d,  $J$  = 7.9 Hz, 1H), 7.24 – 7.14 (m, 2H), 2.73 (s, 3H), 2.43 (s, 3H).

<sup>13</sup>C NMR (101 MHz, CDCl<sub>3</sub>):  $\delta$  146.6, 142.9, 137.4, 134.0, 128.3, 127.1, 21.5, 20.0.

**3,5-dimethylbenzenesulfonyl bromide (35)<sup>5</sup> :**

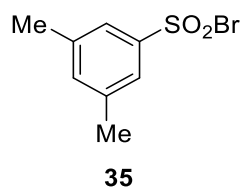

The reaction of 3,5-dimethylbenzenethiol (0.50 mmol, 69.1 mg), DMSO (1.75 mmol, 120  $\mu$ L), HBr (AcOH solution, 33% w/w, 0.75 mmol, 120  $\mu$ L), Ni(OTf)<sub>2</sub> (0.05 mmol, 17.8 mg) in DCM (2 mL) at 40 °C for 12 h, followed by adding DMSO (0.55 mmol, 40  $\mu$ L) and HBr (AcOH solution, 33% w/w, 0.25 mmol, 40  $\mu$ L) at 40 °C for 4 h afforded 90.0 mg (65%) of **35** as a white solid.

<sup>1</sup>H NMR (400 MHz, CDCl<sub>3</sub>):  $\delta$  7.60 (s, 2H), 7.34 (s, 1H), 2.44 (s, 6H).

<sup>13</sup>C NMR (101 MHz, CDCl<sub>3</sub>):  $\delta$  146.9, 139.8, 136.8, 123.7, 21.2.

**naphthalene-2-sulfonyl bromide (36)<sup>4</sup> :**

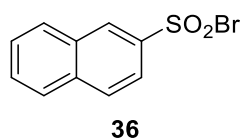

The reaction of 3,5-dimethylbenzenethiol (0.50 mmol, 80.1 mg), DMSO (1.75 mmol, 120  $\mu$ L), HBr (AcOH solution, 33% w/w, 0.75 mmol, 120  $\mu$ L) in DCM (2 mL) at 40 °C

for 12 h, followed by adding DMSO (0.55 mmol, 40  $\mu$ L) and HBr (AcOH solution, 33% w/w, 0.25 mmol, 40  $\mu$ L) at 40  $^{\circ}$ C for 4 h afforded 85.4 mg (63%) of **36** as a white solid.

**$^1$ H NMR (400 MHz,  $\text{CDCl}_3$ ):**  $\delta$  8.54 (d,  $J$  = 1.6 Hz, 1H), 8.08 – 7.92 (m, 4H), 7.79 – 7.64 (m, 2H).

**$^{13}$ C NMR (101 MHz,  $\text{CDCl}_3$ ):**  $\delta$  143.8, 135.6, 131.4, 130.3, 130.1, 129.9, 128.3, 128.1, 128.1, 120.9.

**4-acetamidobenzenesulfonyl bromide (37) :**

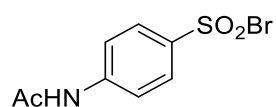

**37**

The reaction of *N*-(4-mercaptophenyl)acetamide (0.50 mmol, 83.6 mg), DMSO (1.75 mmol, 120  $\mu$ L), HBr (AcOH solution, 33% w/w, 0.75 mmol, 120  $\mu$ L) in DCM (2 mL) at 40  $^{\circ}$ C for 6 h afforded 34.8 mg (25%) of **37** as a white solid.

**$^1$ H NMR (400 MHz,  $\text{CDCl}_3$ ):**  $\delta$  7.94 (d,  $J$  = 9.0 Hz, 2H), 7.85 – 7.59 (m, 3H), 2.25 (s, 3H).

**$^{13}$ C NMR (101 MHz,  $\text{CDCl}_3$ ):**  $\delta$  168.7, 144.0, 141.6, 128.1, 119.1, 24.8.

**2-(bromosulfonyl)pyridine 1-oxide (38) :**

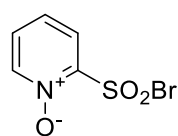

**38**

The reaction of 2-mercaptopyridine 1-oxide (0.50 mmol, 63.6 mg), DMSO (1.75 mmol, 120  $\mu$ L), HBr (AcOH solution, 33% w/w, 0.75 mmol, 120  $\mu$ L) in DCM (2 mL) at 40  $^{\circ}$ C for 12 h afforded 44.0 mg (37%) of **38** as a white solid.

**$^1$ H NMR (400 MHz,  $\text{DMSO-}d_6$ ):**  $\delta$  8.45 (d,  $J$  = 6.2 Hz, 1H), 7.90 (d,  $J$  = 8.0 Hz, 1H), 7.43 (t,  $J$  = 6.5 Hz, 1H), 7.23 (t,  $J$  = 7.7 Hz, 1H).

**$^{13}$ C NMR (101 MHz,  $\text{DMSO-}d_6$ ):**  $\delta$  140.3, 131.9, 131.1, 125.8, 125.7.

**thiophene-3-sulfonyl bromide (39)<sup>5</sup> :**



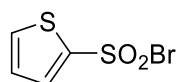

**39**

The reaction of thiophene-2-thiol (0.50 mmol, 58.1 mg), DMSO (1.75 mmol, 120  $\mu$ L), HBr (Aqueous, 48% w/w, 0.75 mmol, 84  $\mu$ L) in DCM (2 mL) at 40  $^{\circ}$ C for 12 h afforded 60.2 mg (53%) of **39** as a yellow oil.

$^1\text{H NMR}$  (400 MHz,  $\text{CDCl}_3$ ):  $\delta$  7.90 – 7.85 (m, 1H), 7.84 – 7.79 (m, 1H), 7.19 – 7.14 (m, 1H).

$^{13}\text{C NMR}$  (101 MHz,  $\text{CDCl}_3$ ):  $\delta$  147.0, 135.3, 134.0, 127.5.

#### 2-methylfuran-3-sulfonyl bromide (**40**) :

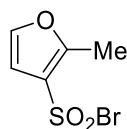

**40**

The reaction of 2-methylfuran-3-thiol (0.50 mmol, 57.1 mg), DMSO (1.75 mmol, 120  $\mu$ L), HBr (Aqueous, 48% w/w, 0.75 mmol, 84  $\mu$ L) in DCM (2 mL) at 40  $^{\circ}$ C for 12 h afforded 46.2 mg (41%) of **40** as a brown oil.

$^1\text{H NMR}$  (400 MHz,  $\text{CDCl}_3$ ):  $\delta$  7.34 (s, 1H), 6.74 (s, 1H), 2.63 (s, 3H).

$^{13}\text{C NMR}$  (101 MHz,  $\text{CDCl}_3$ ):  $\delta$  157.6, 141.1, 129.6, 108.9, 13.3.

HRMS  $m/z$  (EI) calcd for  $\text{C}_5\text{H}_5\text{BrO}_3\text{S}$   $[\text{M}]^+$  223.9137, found: 223.9135.

#### *N*-phenethyloctane-1-sulfonamide (**41**)<sup>11</sup> :

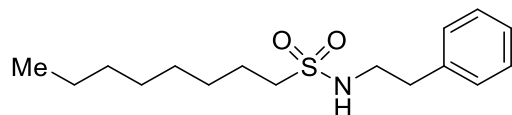

**41**

The reaction of octane-1-thiol (0.50 mmol, 73.1 mg), DMSO (1.75 mmol, 120  $\mu$ L), HBr (AcOH solution, 33% w/w, 0.75 mmol, 120  $\mu$ L),  $\text{Ni}(\text{OTf})_2$  (0.05 mmol, 17.8 mg) in DCM (2 mL) at 40  $^{\circ}$ C for 12 h, followed by added dropwise into DCM (1 mL) solution of 2-phenylethan-1-amine (1.5 mmol, 181.8 mg) and  $\text{NEt}_3$  (4 mmol, 404.8 mg) in ice-

salt bath, then reacted at ambient temperature for 8 h afforded 93.7 mg (63%) of **41** as a white solid.

**<sup>1</sup>H NMR (400 MHz, CDCl<sub>3</sub>):** δ 7.34 – 7.27 (m, 2H), 7.27 – 7.19 (m, 3H), 4.55 (t, *J* = 6.1 Hz, 1H), 3.37 (q, *J* = 6.8 Hz, 2H), 2.90 – 2.83 (m, 4H), 1.72 – 1.62 (m, 2H), 1.26 (s, 10H), 0.89 (t, *J* = 6.8 Hz, 3H).

**<sup>13</sup>C NMR (101 MHz, CDCl<sub>3</sub>):** δ 137.9, 128.7, 128.6, 126.7, 52.5, 44.3, 36.5, 31.6, 28.9, 28.8, 28.1, 23.4, 22.5, 13.9.

**MS m/z (ESI)** calcd for C<sub>16</sub>H<sub>28</sub>NO<sub>2</sub>S [M+H]<sup>+</sup> 298.18, found: 298.18.

***N*-benzyloctane-1-sulfonamide (42) :**

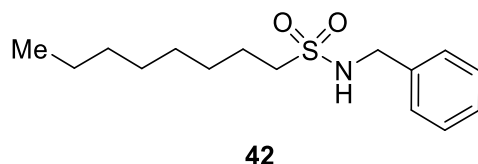

The reaction of octane-1-thiol (0.50 mmol, 73.1 mg), DMSO (1.75 mmol, 120 μL), HBr (AcOH solution, 33% w/w, 0.75 mmol, 120 μL), Ni(OTf)<sub>2</sub> (0.05 mmol, 17.8 mg) in DCM (2 mL) at 40 °C for 12 h, followed by added dropwise into DCM (1 mL) solution of phenylmethanamine (1.5 mmol, 160.8 mg) and NEt<sub>3</sub> (4 mmol, 404.8 mg) in ice-salt bath, then reacted at ambient temperature for 8 h afforded 90.7 mg (64%) of **42** as a white solid.

**<sup>1</sup>H NMR (400 MHz, CDCl<sub>3</sub>):** δ 7.38 – 7.25 (m, 5H), 5.04 (t, *J* = 6.1 Hz, 1H), 4.26 (d, *J* = 6.2 Hz, 2H), 2.85 (t, *J* = 8.0 Hz, 2H), 1.74 – 1.64 (m, 2H), 1.24 (s, 10H), 0.88 (t, *J* = 6.9 Hz, 3H).

**<sup>13</sup>C NMR (101 MHz, CDCl<sub>3</sub>):** δ 137.0, 128.6, 127.8, 53.1, 46.9, 31.6, 28.9, 28.8, 28.1, 23.4, 22.5, 13.9.

**HRMS m/z (ESI)** calcd for C<sub>15</sub>H<sub>26</sub>NO<sub>2</sub>S [M+H]<sup>+</sup> 284.1684, found: 284.1689.

***N*-isobutyloctane-1-sulfonamide (43) :**

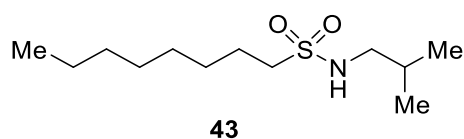

The reaction of octane-1-thiol (0.50 mmol, 73.1 mg), DMSO (1.75 mmol, 120  $\mu$ L), HBr (AcOH solution, 33% w/w, 0.75 mmol, 120  $\mu$ L), Ni(OTf)<sub>2</sub> (0.05 mmol, 17.8 mg) in DCM (2 mL) at 40 °C for 12 h, followed by added dropwise into DCM (1 mL) solution of 2-methylpropan-1-amine (1.5 mmol, 109.8 mg) and NEt<sub>3</sub> (4 mmol, 404.8 mg) in ice-salt bath, then reacted at ambient temperature for 8 h afforded 73.6 mg (59%) of **43** as a white solid.

**<sup>1</sup>H NMR (400 MHz, CDCl<sub>3</sub>):**  $\delta$  4.37 (s, 1H), 2.99 (t,  $J$  = 7.6 Hz, 2H), 2.91 (t,  $J$  = 5.8 Hz, 2H), 1.84 – 1.74 (m, 3H), 1.45 – 1.35 (m, 2H), 1.34 – 1.21 (m, 8H), 0.94 (d,  $J$  = 6.7 Hz, 6H), 0.87 (t,  $J$  = 6.8 Hz, 3H).

**<sup>13</sup>C NMR (101 MHz, CDCl<sub>3</sub>):**  $\delta$  52.5, 50.6, 31.6, 29.0, 28.95, 28.93, 28.2, 23.6, 22.5, 19.8, 14.0.

**HRMS m/z (ESI)** calcd for C<sub>12</sub>H<sub>28</sub>NO<sub>2</sub>S [M+H]<sup>+</sup> 250.1841, found: 250.1842.

***N*-cyclohexyl-2-phenylethane-1-sulfonamide (**44**)<sup>12</sup> :**

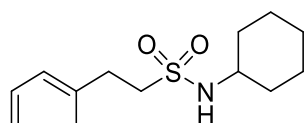

**44**

The reaction of 2-phenylethane-1-thiol (0.50 mmol, 69.1 mg), DMSO (1.75 mmol, 120  $\mu$ L), HBr (AcOH solution, 33% w/w, 0.75 mmol, 120  $\mu$ L), Ni(OTf)<sub>2</sub> (0.05 mmol, 17.8 mg) in DCM (2 mL) at 40 °C for 12 h, followed by added dropwise into DCM (1 mL) solution of cyclohexanamine (1.5 mmol, 148.8 mg) and NEt<sub>3</sub> (4 mmol, 404.8 mg) in ice-salt bath, then reacted at ambient temperature for 8 h afforded 69.5 mg (52%) of **44** as a white solid.

**<sup>1</sup>H NMR (400 MHz, CDCl<sub>3</sub>):**  $\delta$  7.38 – 7.30 (m, 2H), 7.30 – 7.26 (m, 1H), 7.26 – 7.22 (m, 2H), 4.17 (d,  $J$  = 7.6 Hz, 1H), 3.37 – 3.23 (m, 3H), 3.20 – 3.10 (m, 2H), 1.97 – 1.93 (m, 2H), 1.78 – 1.60 (m, 2H), 1.60 – 1.56 (m, 1H), 1.40 – 1.16 (m, 5H).

**<sup>13</sup>C NMR (101 MHz, CDCl<sub>3</sub>):**  $\delta$  138.0, 128.8, 128.4, 126.9, 55.4, 52.8, 34.5, 30.2, 25.1, 24.7.

**MS m/z (ESI)** calcd for C<sub>14</sub>H<sub>22</sub>NO<sub>2</sub>S [M+H]<sup>+</sup> 268.14, found: 268.14

**methyl (octylsulfonyl)glycinate (45) :**

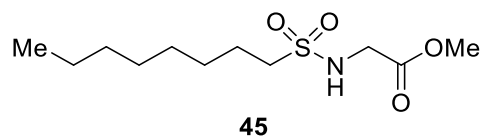

The reaction of octane-1-thiol (0.50 mmol, 73.1 mg), DMSO (1.75 mmol, 120  $\mu$ L), HBr (AcOH solution, 33% w/w, 0.75 mmol, 120  $\mu$ L), Ni(OTf)<sub>2</sub> (0.05 mmol, 17.8 mg) in DCM (2 mL) at 40 °C for 12 h, followed by added dropwise into DCM (1 mL) solution of methyl glycinate hydrochloride (1.5 mmol, 188.3 mg) and NEt<sub>3</sub> (5.5 mmol, 556.1 mg) in ice-salt bath, then reacted at ambient temperature for 8 h afforded 66.3 mg (50%) of **45** as a white solid.

**<sup>1</sup>H NMR (400 MHz, CDCl<sub>3</sub>):**  $\delta$  4.91 (t,  $J$  = 5.5 Hz, 1H), 3.94 (d,  $J$  = 5.7 Hz, 2H), 3.77 (s, 3H), 3.05 (t,  $J$  = 8.0 Hz, 2H), 1.88 – 1.76 (m, 2H), 1.47 – 1.36 (m, 2H), 1.35 – 1.22 (m, 8H), 0.87 (t,  $J$  = 6.9 Hz, 3H).

**<sup>13</sup>C NMR (101 MHz, CDCl<sub>3</sub>):**  $\delta$  170.2, 53.7, 52.6, 44.1, 31.6, 29.0, 28.9, 28.2, 23.5, 22.5, 14.0.

**HRMS m/z (ESI)** calcd for C<sub>11</sub>H<sub>24</sub>NO<sub>4</sub>S [M+H]<sup>+</sup> 266.1426, found: 266.1430.

**1-(octylsulfonyl)piperidine (46) :**

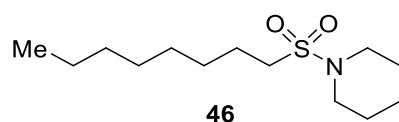

The reaction of octane-1-thiol (0.50 mmol, 73.1 mg), DMSO (1.75 mmol, 120  $\mu$ L), HBr (AcOH solution, 33% w/w, 0.75 mmol, 120  $\mu$ L), Ni(OTf)<sub>2</sub> (0.05 mmol, 17.8 mg) in DCM (2 mL) at 40 °C for 12 h, followed by added dropwise into DCM (1 mL) solution of piperidine (1.5 mmol, 127.8 mg) and NEt<sub>3</sub> (4 mmol, 404.8 mg) in ice-salt bath, then reacted at ambient temperature for 8 h afforded 81.0 mg (62%) of **46** as a white solid.

**<sup>1</sup>H NMR (400 MHz, CDCl<sub>3</sub>):**  $\delta$  3.26 – 3.18 (m, 4H), 2.86 (t,  $J$  = 8.0 Hz, 2H), 1.84 – 1.75 (m, 2H), 1.64 (s, 4H), 1.56 (s, 2H), 1.44 – 1.35 (m, 2H), 1.33 – 1.22 (m, 8H), 0.90 – 0.84 (m, 3H).

**<sup>13</sup>C NMR (101 MHz, CDCl<sub>3</sub>):**  $\delta$  49.1, 46.6, 31.7, 29.0, 28.9, 28.5, 25.7, 23.8, 23.0, 22.6, 14.0.

**HRMS m/z (ESI)** calcd for C<sub>13</sub>H<sub>28</sub>NO<sub>2</sub>S [M+H]<sup>+</sup> 262.1841, found: 262.1844.

**1-(octylsulfonyl)-4-phenylpiperidine (47) :**

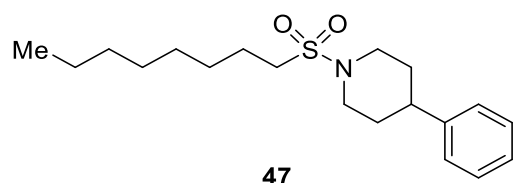

The reaction of octane-1-thiol (0.50 mmol, 73.1 mg), DMSO (1.75 mmol, 120  $\mu$ L), HBr (AcOH solution, 33% w/w, 0.75 mmol, 120  $\mu$ L), Ni(OTf)<sub>2</sub> (0.05 mmol, 17.8 mg) in DCM (2 mL) at 40 °C for 12 h, followed by added dropwise into DCM (1 mL) solution of 4-phenylpiperidine (1.5 mmol, 241.8 mg) and NEt<sub>3</sub> (4 mmol, 404.8 mg) in ice-salt bath, then reacted at ambient temperature for 8 h afforded 148.4 mg (71%) of **47** as a white solid.

**<sup>1</sup>H NMR (400 MHz, CDCl<sub>3</sub>):**  $\delta$  7.34 – 7.30 (m, 2H), 7.25 – 7.19 (m, 3H), 3.94 (d,  $J$  = 12.1 Hz, 2H), 2.98 – 2.82 (m, 4H), 2.62 (t,  $J$  = 12.1 Hz, 1H), 1.95 – 1.92 (m, 2H), 1.89 – 1.74 (m, 4H), 1.47 – 1.39 (m, 2H), 1.36 – 1.25 (m, 8H), 0.92 – 0.85 (m, 3H).

**<sup>13</sup>C NMR (101 MHz, CDCl<sub>3</sub>):**  $\delta$  144.9, 128.6, 126.7, 126.6, 49.4, 46.5, 42.1, 33.1, 31.7, 29.1, 29.0, 28.5, 23.1, 22.6, 14.1.

**HRMS m/z (ESI)** calcd for C<sub>19</sub>H<sub>32</sub>NO<sub>2</sub>S [M+H]<sup>+</sup> 338.2154, found: 338.2156.

**4-benzyl-1-(octylsulfonyl)piperidine (48) :**

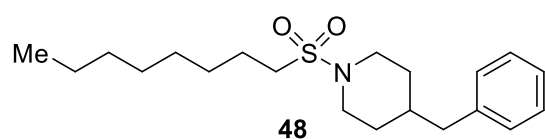

The reaction of octane-1-thiol (0.50 mmol, 73.1 mg), DMSO (1.75 mmol, 120  $\mu$ L), HBr (AcOH solution, 33% w/w, 0.75 mmol, 120  $\mu$ L), Ni(OTf)<sub>2</sub> (0.05 mmol, 17.8 mg) in DCM (2 mL) at 40 °C for 12 h, followed by added dropwise into DCM (1 mL) solution of 4-benzylpiperidine (1.5 mmol, 262.9 mg) and NEt<sub>3</sub> (4 mmol, 404.8 mg) in ice-salt bath, then reacted at ambient temperature for 8 h afforded 131.7 mg (60%) of **48** as a white solid.

**<sup>1</sup>H NMR (400 MHz, CDCl<sub>3</sub>):**  $\delta$  7.28 (t,  $J$  = 7.4 Hz, 2H), 7.20 (t,  $J$  = 7.2 Hz, 1H), 7.13 (d,  $J$  = 7.5 Hz, 2H), 3.77 (d,  $J$  = 12.1 Hz, 2H), 2.89 – 2.82 (m, 2H), 2.68 (t,  $J$  = 11.6 Hz,

2H), 2.56 (d,  $J = 7.0$  Hz, 2H), 1.81 – 1.69 (m, 4H), 1.65 (s, 1H), 1.38 (d,  $J = 7.8$  Hz, 2H), 1.27 (s, 10H), 0.88 (t,  $J = 6.6$  Hz, 3H).

**$^{13}\text{C}$  NMR (101 MHz,  $\text{CDCl}_3$ ):**  $\delta$  139.7, 129.0, 128.2, 126.0, 49.2, 46.0, 42.7, 37.6, 31.8, 31.6, 29.0, 28.9, 28.4, 23.0, 22.5, 14.0.

**HRMS  $m/z$  (ESI)** calcd for  $\text{C}_{20}\text{H}_{34}\text{NO}_2\text{S}$   $[\text{M}+\text{H}]^+$  352.2310, found: 352.2307.

**1'-(phenethylsulfonyl)-1,4'-bipiperidine (49) :**

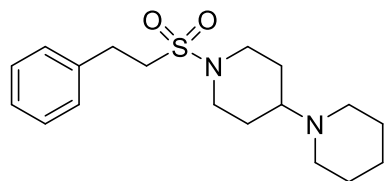

**49**

The reaction of 2-phenylethane-1-thiol (0.50 mmol, 69.1 mg), DMSO (1.75 mmol, 120  $\mu\text{L}$ ), HBr (AcOH solution, 33% w/w, 0.75 mmol, 120  $\mu\text{L}$ ),  $\text{Ni}(\text{OTf})_2$  (0.05 mmol, 17.8 mg) in DCM (2 mL) at 40  $^\circ\text{C}$  for 12 h, followed by added dropwise into DCM (1 mL) solution of 1,4'-bipiperidine (1.5 mmol, 252.5 mg) and  $\text{NEt}_3$  (4 mmol, 404.8 mg) in ice-salt bath, then reacted at ambient temperature for 8 h afforded 94.2 mg (56%) of **49** as a white solid.

**$^1\text{H}$  NMR (400 MHz,  $\text{CDCl}_3$ ):**  $\delta$  7.34 – 7.30 (m, 2H), 7.26 – 7.18 (m, 3H), 3.86 (d,  $J = 12.2$  Hz, 2H), 3.20 – 3.05 (m, 4H), 2.74 (t,  $J = 11.6$  Hz, 2H), 2.55 – 2.44 (m, 4H), 2.34 (t,  $J = 11.4$  Hz, 1H), 1.87 (d,  $J = 12.5$  Hz, 2H), 1.65 – 1.54 (m, 6H), 1.48 – 1.39 (m, 2H).

**$^{13}\text{C}$  NMR (101 MHz,  $\text{CDCl}_3$ ):**  $\delta$  138.1, 128.8, 128.3, 126.8, 61.9, 50.9, 50.1, 45.7, 29.3, 27.8, 26.3, 24.6.

**HRMS  $m/z$  (ESI)** calcd for  $\text{C}_{18}\text{H}_{29}\text{N}_2\text{O}_2\text{S}$   $[\text{M}+\text{H}]^+$  337.1950, found: 337.1953.

**3-methyl-1-(phenethylsulfonyl)piperidine (50) :**

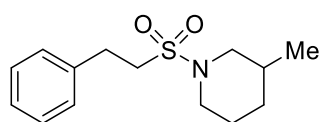

**50**

The reaction of 2-phenylethane-1-thiol (0.50 mmol, 69.1 mg), DMSO (1.75 mmol, 120  $\mu$ L), HBr (AcOH solution, 33% w/w, 0.75 mmol, 120  $\mu$ L), Ni(OTf)<sub>2</sub> (0.05 mmol, 17.8 mg) in DCM (2 mL) at 40 °C for 12 h, followed by added dropwise into DCM (1 mL) solution of 3-methylpiperidine (1.5 mmol, 148.8 mg) and NEt<sub>3</sub> (4 mmol, 404.8 mg) in ice-salt bath, then reacted at ambient temperature for 8 h afforded 82.9 mg (62%) of **50** as a white solid.

**<sup>1</sup>H NMR (400 MHz, CDCl<sub>3</sub>):**  $\delta$  7.34 – 7.28 (m, 2H), 7.29 – 7.21 (m, 3H), 3.72 (t,  $J$  = 13.2 Hz, 2H), 3.15 (s, 4H), 2.73 – 2.53 (m, 1H), 2.35 (t,  $J$  = 10.4 Hz, 1H), 1.87 – 1.54 (m, 4H), 1.04 – 0.95 (m, 1H), 0.93 (d,  $J$  = 6.6 Hz, 3H).

**<sup>13</sup>C NMR (101 MHz, CDCl<sub>3</sub>):**  $\delta$  138.2, 128.8, 128.3, 126.8, 52.8, 50.7, 46.1, 32.3, 31.0, 29.3, 25.1, 18.8.

**HRMS m/z (ESI)** calcd for C<sub>14</sub>H<sub>22</sub>NO<sub>2</sub>S [M+H]<sup>+</sup> 268.1371, found: 268.1372.

#### 1-(octylsulfonyl)azepane (**51**) :

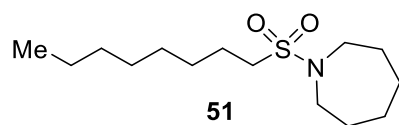

The solution of thiol **1** (0.50 mmol, 73.1 mg), Ni(OTf)<sub>2</sub> (0.05 mmol, 17.8 mg), DMSO (1.75 mmol, 136.7 mg) and HBr (AcOH solution, 33% w/w, 0.75 mmol, 120  $\mu$ L) in anhydrous DCM (2.0 mL) was heated at 40 °C for 12 h. After the termination of the reaction, the reaction mixture was added dropwise into DCM (1 mL) solution of hexamethyleneimine (1.5 mmol, 148.8 mg) and NEt<sub>3</sub> (4 mmol, 404.8 mg) in ice-salt bath, then reacted for another 8 h to afford 95.6 mg (69%) of **51** as a colorless oil.

**<sup>1</sup>H NMR (400 MHz, CDCl<sub>3</sub>):**  $\delta$  3.33 (t,  $J$  = 6.0 Hz, 4H), 2.97 – 2.84 (m, 2H), 1.80 – 1.70 (m, 6H), 1.66 – 1.58 (m, 4H), 1.40 – 1.35 (m, 2H), 1.26 (s, 8H), 0.86 (t,  $J$  = 6.8 Hz, 3H).

**<sup>13</sup>C NMR (101 MHz, CDCl<sub>3</sub>):**  $\delta$  50.7, 48.2, 31.6, 29.6, 29.0, 28.9, 28.4, 26.8, 23.3, 22.5, 14.0.

**HRMS m/z (ESI)** calcd for C<sub>14</sub>H<sub>30</sub>NO<sub>2</sub>S [M+H]<sup>+</sup> 276.1997, found: 276.1996.

#### 1-(octylsulfonyl)azocane (**52**) :

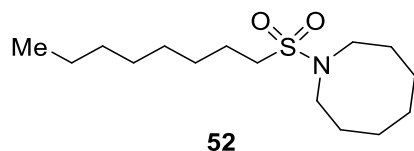

The solution of thiol **1** (0.50 mmol, 73.1 mg), Ni(OTf)<sub>2</sub> (0.05 mmol, 17.8 mg), DMSO (1.75 mmol, 136.7 mg) and HBr (AcOH solution, 33% w/w, 0.75 mmol, 120 μL) in anhydrous DCM (2.0 mL) was heated at 40 °C for 12 h. After the termination of the reaction, the reaction mixture was added dropwise into DCM (1 mL) solution of azocane (1.5 mmol, 169.8 mg) and NEt<sub>3</sub> (4 mmol, 404.8 mg) in ice-salt bath, then reacted for another 8 h to afford 85.0 mg (59%) of **52** as a colorless oil.

**<sup>1</sup>H NMR (400 MHz, CDCl<sub>3</sub>):** δ 3.26 (t, *J* = 5.8 Hz, 4H), 2.98 – 2.83 (m, 2H), 1.82 – 1.67 (m, 6H), 1.64 (s, 6H), 1.42 – 1.34 (m, 2H), 1.33 – 1.19 (m, 8H), 0.87 (t, *J* = 6.8 Hz, 3H).

**<sup>13</sup>C NMR (101 MHz, CDCl<sub>3</sub>):** δ 49.4, 48.9, 31.6, 29.0, 28.9, 28.5, 28.0, 26.7, 24.8, 23.2, 22.5, 14.0.

**HRMS m/z (ESI)** calcd for C<sub>15</sub>H<sub>32</sub>NO<sub>2</sub>S [M+H]<sup>+</sup> 290.2154, found: 290.2154.

**1-(octylsulfonyl)azepan-4-one (53) :**

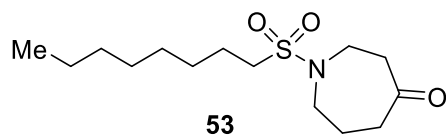

The solution of thiol **1** (0.50 mmol, 73.1 mg), Ni(OTf)<sub>2</sub> (0.05 mmol, 17.8 mg), DMSO (1.75 mmol, 136.7 mg) and HBr (AcOH solution, 33% w/w, 0.75 mmol, 120 μL) in anhydrous DCM (2.0 mL) was heated at 40 °C for 12 h. After the termination of the reaction, the reaction mixture was added dropwise into DCM (1 mL) solution of 4-perhydroazepinone hydrochloride (1.5 mmol, 224.4 mg) and NEt<sub>3</sub> (4.5 mmol, 455.4 mg) in ice-salt bath, then reacted for another 8 h to afford 81.4 mg (56%) of **53** as a white oil.

**<sup>1</sup>H NMR (400 MHz, CDCl<sub>3</sub>):** δ 3.59 – 3.45 (m, 4H), 2.99 – 2.86 (m, 2H), 2.76 – 2.59 (m, 4H), 1.95 – 1.85 (m, 2H), 1.81 – 1.70 (m, 2H), 1.44 – 1.35 (m, 2H), 1.27 (s, 8H), 0.91 – 0.84 (m, 3H).



**<sup>13</sup>C NMR (101 MHz, CDCl<sub>3</sub>):** δ 210.5, 51.6, 50.7, 45.5, 44.4, 42.5, 31.6, 29.0, 28.9, 28.3, 25.7, 23.3, 22.5, 14.0.

**HRMS m/z (ESI)** calcd for C<sub>14</sub>H<sub>31</sub>N<sub>2</sub>O<sub>3</sub>S [M+NH<sub>4</sub>]<sup>+</sup> 307.2050, found *m/z*: 307.2055.

**1-methyl-4-(phenethylsulfonyl)piperazine (54) :**

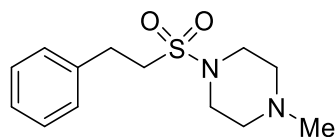

**54**

The reaction of 2-phenylethane-1-thiol (0.50 mmol, 69.1 mg), DMSO (1.75 mmol, 120 μL), HBr (AcOH solution, 33% w/w, 0.75 mmol, 120 μL), Ni(OTf)<sub>2</sub> (0.05 mmol, 17.8 mg) in DCM (2 mL) at 40 °C for 12 h, followed by added dropwise into DCM (1 mL) solution of 1-methylpiperazine (1.5 mmol, 150.3 mg) and NEt<sub>3</sub> (4 mmol, 404.8 mg) in ice-salt bath, then reacted at ambient temperature for 8 h afforded 92.6 mg (69%) of **54** as a white solid.

**<sup>1</sup>H NMR (400 MHz, CDCl<sub>3</sub>):** δ 7.34 – 7.30 (m, 2H), 7.26 (s, 1H), 7.23 – 7.18 (m, 2H), 3.40 – 3.26 (m, 4H), 3.21 – 3.08 (m, 4H), 2.57 – 2.43 (m, 4H), 2.32 (s, 3H).

**<sup>13</sup>C NMR (101 MHz, CDCl<sub>3</sub>):** δ 137.8, 128.7, 128.1, 126.7, 54.3, 50.5, 45.7, 45.4, 29.1.

**HRMS m/z (ESI)** calcd for C<sub>13</sub>H<sub>21</sub>N<sub>2</sub>O<sub>2</sub>S [M+H]<sup>+</sup> 269.1324, found: 269.1328.

**1-ethyl-4-(phenethylsulfonyl)piperazine (55) :**

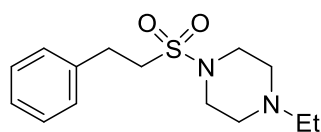

**55**

The reaction of 2-phenylethane-1-thiol (0.50 mmol, 69.1 mg), DMSO (1.75 mmol, 120 μL), HBr (AcOH solution, 33% w/w, 0.75 mmol, 120 μL), Ni(OTf)<sub>2</sub> (0.05 mmol, 17.8 mg) in DCM (2 mL) at 40 °C for 12 h, followed by added dropwise into DCM (1 mL) solution of 1-ethylpiperazine (1.5 mmol, 171.3 mg) and NEt<sub>3</sub> (4 mmol, 404.8 mg) in ice-salt bath, then reacted at ambient temperature for 8 h afforded 115.4 mg (68%) of **55** as a white solid.

**<sup>1</sup>H NMR (400 MHz, CDCl<sub>3</sub>):** δ 7.36 – 7.29 (m, 2H), 7.28 – 7.24 (m, 1H), 7.23 – 7.18 (m, 2H), 3.33 (t, *J* = 4.3 Hz, 4H), 3.23 – 3.08 (m, 4H), 2.52 (t, *J* = 4.3 Hz, 4H), 2.46 (q, *J* = 7.2 Hz, 2H), 1.09 (t, *J* = 7.2 Hz, 3H).

**<sup>13</sup>C NMR (101 MHz, CDCl<sub>3</sub>):** δ 137.9, 128.7, 128.1, 126.7, 52.1, 51.8, 50.3, 45.5, 29.1, 11.7.

**HRMS m/z (ESI)** calcd for C<sub>14</sub>H<sub>23</sub>N<sub>2</sub>O<sub>2</sub>S [M+H]<sup>+</sup> 283.1480, found: 283.1480.

**4-(phenethylsulfonyl)morpholine (56)<sup>13</sup> :**

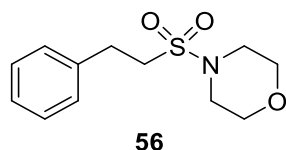

The reaction of 2-phenylethane-1-thiol (0.50 mmol, 69.1 mg), DMSO (1.75 mmol, 120 μL), HBr (AcOH solution, 33% w/w, 0.75 mmol, 120 μL), Ni(OTf)<sub>2</sub> (0.05 mmol, 17.8 mg) in DCM (2 mL) at 40 °C for 12 h, followed by added dropwise into DCM (1 mL) solution of morpholine (1.5 mmol, 130.6 mg) and NEt<sub>3</sub> (4 mmol, 404.8 mg) in ice-salt bath, then reacted at ambient temperature for 8 h afforded 84.2 mg (66%) of **56** as a white solid.

**<sup>1</sup>H NMR (400 MHz, CDCl<sub>3</sub>):** δ 7.34 – 7.30 (m, 2H), 7.29 – 7.25 (m, 1H), 7.25 – 7.20 (m, 2H), 3.72 (t, *J* = 4.4 Hz, 4H), 3.24 (t, *J* = 4.4 Hz, 4H), 3.20 – 3.05 (m, 4H).

**<sup>13</sup>C NMR (101 MHz, CDCl<sub>3</sub>):** δ 137.8, 128.8, 128.3, 126.9, 66.5, 50.2, 45.7, 29.1.

**MS m/z (ESI)** calcd for C<sub>12</sub>H<sub>18</sub>NO<sub>3</sub>S [M+H]<sup>+</sup> 256.10, found: 256.10.

**1-(octylsulfonyl)-1*H*-imidazole (57) :**

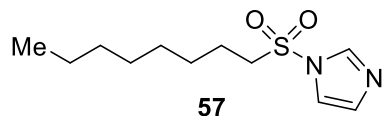

The solution of thiol **1** (0.50 mmol, 73.1 mg), Ni(OTf)<sub>2</sub> (0.05 mmol, 17.8 mg), DMSO (1.75 mmol, 136.7 mg) and HBr (AcOH solution, 33% w/w, 0.75 mmol, 120 μL) in anhydrous DCM (2.0 mL) was heated at 40 °C for 12 h. After the termination of the reaction, the reaction mixture was added dropwise into DCM (1 mL) solution of 1*H*-

imidazole (1.5 mmol, 102.1 mg) and NEt<sub>3</sub> (4 mmol, 404.8 mg) in ice-salt bath, then reacted for another 8 h to afford 57.7 mg (47%) of **57** as an orange oil.

**<sup>1</sup>H NMR (400 MHz, CDCl<sub>3</sub>):** δ 7.95 (s, 1H), 7.30 (s, 1H), 7.18 (s, 1H), 3.33 – 3.27 (m, 2H), 1.74 – 1.68 (m, 2H), 1.40 – 1.33 (m, 2H), 1.29 – 1.21 (m, 8H), 0.87 (t, *J* = 6.9 Hz, 3H).

**<sup>13</sup>C NMR (101 MHz, CDCl<sub>3</sub>):** δ 136.9, 131.3, 117.6, 56.0, 31.5, 28.7, 27.7, 23.1, 22.4, 13.9.

**HRMS m/z (ESI)** calcd for C<sub>11</sub>H<sub>21</sub>N<sub>2</sub>O<sub>2</sub>S [M+H]<sup>+</sup> 245.1324, found: 245.1328.

**methyl (octylsulfonyl)-L-prolinate (58) :**

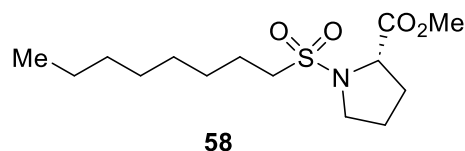

The solution of thiol **1** (0.50 mmol, 73.1 mg), Ni(OTf)<sub>2</sub> (0.05 mmol, 17.8 mg), DMSO (1.75 mmol, 136.7 mg) and HBr (AcOH solution, 33% w/w, 0.75 mmol, 120 μL) in anhydrous DCM (2.0 mL) was heated at 40 °C for 12 h. After the termination of the reaction, the reaction mixture was added dropwise into DCM (1 mL) solution of methyl *L*-prolinate hydrochloride (1.5 mmol, 248.4 mg) and NEt<sub>3</sub> (4.5 mmol, 455.4 mg) in ice-salt bath, then reacted for another 8 h to afford 81.7 mg (53%) of **58** as a yellow oil.

**<sup>1</sup>H NMR (400 MHz, CDCl<sub>3</sub>):** δ 4.50 (dd, *J* = 8.5, 3.8 Hz, 1H), 3.72 (s, 3H), 3.57 (q, *J* = 7.1 Hz, 1H), 3.45 – 3.38 (m, 1H), 3.08 (t, *J* = 7.1 Hz, 2H), 2.30 – 2.21 (m, 1H), 2.07 – 2.01 (m, 1H), 2.00 – 1.94 (m, 2H), 1.85 – 1.77 (m, 2H), 1.42 – 1.35 (m, 2H), 1.31 – 1.21 (m, 8H), 0.89 – 0.82 (m, 3H).

**<sup>13</sup>C NMR (101 MHz, CDCl<sub>3</sub>):** δ 172.9, 60.2, 52.8, 52.2, 48.2, 31.6, 30.8, 29.0, 28.8, 28.3, 25.0, 23.0, 22.5, 13.9.

**HRMS m/z (ESI)** calc'd for C<sub>14</sub>H<sub>28</sub>NO<sub>4</sub>S [M+H]<sup>+</sup> 306.1739, found: 306.1743.

**1-(octylsulfonyl)pyrrolidine (59) :**

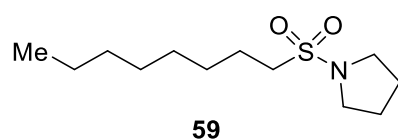

The reaction of octane-1-thiol (0.50 mmol, 73.1 mg), DMSO (1.75 mmol, 120  $\mu$ L), HBr (AcOH solution, 33% w/w, 0.75 mmol, 120  $\mu$ L), Ni(OTf)<sub>2</sub> (0.05 mmol, 17.8 mg) in DCM (2 mL) at 40 °C for 12 h, followed by added dropwise into DCM (1 mL) solution of pyrrolidine (1.5 mmol, 106.6 mg) and NEt<sub>3</sub> (4 mmol, 404.8 mg) in ice-salt bath, then reacted at ambient temperature for 8 h afforded 73.0 mg (59%) of **59** as a white solid.

**<sup>1</sup>H NMR (400 MHz, CDCl<sub>3</sub>):**  $\delta$  3.35 (t,  $J$  = 6.7 Hz, 4H), 2.94 (t,  $J$  = 8.0 Hz, 2H), 2.00 – 1.86 (m, 4H), 1.86 – 1.74 (m, 2H), 1.43 – 1.37 (m, 2H), 1.35 – 1.22 (m, 8H), 0.87 (t,  $J$  = 6.8 Hz, 3H).

**<sup>13</sup>C NMR (101 MHz, CDCl<sub>3</sub>):**  $\delta$  49.5, 47.6, 31.7, 29.0, 28.9, 28.4, 25.8, 23.2, 22.5, 14.0.

**HRMS m/z (ESI)** calc'd for C<sub>12</sub>H<sub>26</sub>NO<sub>2</sub>S [M+H]<sup>+</sup> 248.1684, found: 248.1687.

**methyl 1-(octylsulfonyl)azetidine-3-carboxylate (60) :**

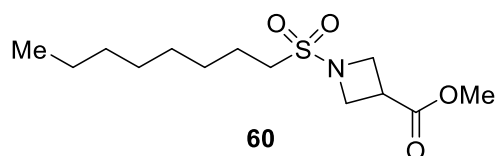

The reaction of octane-1-thiol (0.50 mmol, 73.1 mg), DMSO (1.75 mmol, 120  $\mu$ L), HBr (AcOH solution, 33% w/w, 0.75 mmol, 120  $\mu$ L), Ni(OTf)<sub>2</sub> (0.05 mmol, 17.8 mg) in DCM (2 mL) at 40 °C for 12 h, followed by added dropwise into DCM (1 mL) solution of methyl azetidine-3-carboxylate hydrochloride (1.5 mmol, 227.4 mg) and NEt<sub>3</sub> (5.5 mmol, 556.1 mg) in ice-salt bath, then reacted at ambient temperature for 8 h afforded 93.3 mg (64%) of **60** as a white solid.

**<sup>1</sup>H NMR (400 MHz, CDCl<sub>3</sub>):**  $\delta$  4.11 (d,  $J$  = 8.5 Hz, 4H), 3.76 (s, 3H), 3.44 – 3.35 (m, 1H), 2.93 (t,  $J$  = 8.0 Hz, 2H), 1.82 – 1.74 (m, 2H), 1.46 – 1.34 (m, 2H), 1.34 – 1.22 (m, 8H), 0.87 (t,  $J$  = 6.8 Hz, 3H).

**<sup>13</sup>C NMR (101 MHz, CDCl<sub>3</sub>):**  $\delta$  172.0, 52.4, 52.0, 51.0, 31.6, 31.4, 28.97, 28.90, 28.3, 23.0, 22.5, 14.0.

**HRMS m/z (ESI)** calcd for C<sub>13</sub>H<sub>26</sub>NO<sub>4</sub>S [M+H]<sup>+</sup> 292.1583, found: 292.1588.

***N,N*-diethyl-2-phenylethane-1-sulfonamide (61) :**

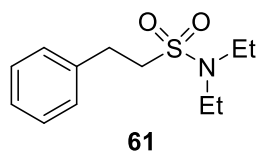

The reaction of octane-1-thiol (0.50 mmol, 73.1 mg), DMSO (1.75 mmol, 120  $\mu$ L), HBr (AcOH solution, 33% w/w, 0.75 mmol, 120  $\mu$ L), Ni(OTf)<sub>2</sub> (0.05 mmol, 17.8 mg) in DCM (2 mL) at 40 °C for 12 h, followed by added dropwise into DCM (1 mL) solution of diethylamine (5 mmol, 365.5 mg) and NEt<sub>3</sub> (4 mmol, 404.8 mg) in ice-salt bath, then reacted at ambient temperature for 8 h afforded 49.5 mg (41%) of **61** as a yellow oil.

**<sup>1</sup>H NMR (400 MHz, CDCl<sub>3</sub>):**  $\delta$  7.37 – 7.28 (m, 2H), 7.26 – 7.23 (m, 1H), 7.23 – 7.18 (m, 2H), 3.31 (q,  $J$  = 7.1 Hz, 4H), 3.20 – 3.04 (m, 4H), 1.21 (t,  $J$  = 7.1 Hz, 6H).

**<sup>13</sup>C NMR (101 MHz, CDCl<sub>3</sub>):**  $\delta$  138.2, 128.7, 128.2, 126.7, 53.7, 41.4, 29.7, 14.4.

**HRMS m/z (ESI)** calcd for C<sub>12</sub>H<sub>20</sub>NO<sub>2</sub>S [M+H]<sup>+</sup> 242.1215, found: 242.1218.

***N*-(4-methoxyphenyl)octane-1-sulfonamide (62) :**

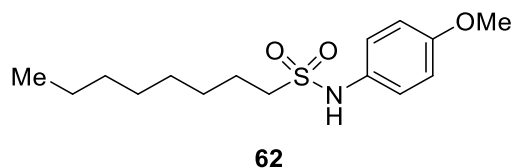

The reaction of octane-1-thiol (0.50 mmol, 73.1 mg), DMSO (1.75 mmol, 120  $\mu$ L), HBr (AcOH solution, 33% w/w, 0.75 mmol, 120  $\mu$ L), Ni(OTf)<sub>2</sub> (0.05 mmol, 17.8 mg) in DCM (2 mL) at 40 °C for 12 h, followed by added dropwise into DCM (1 mL) solution of methyl 4-methoxyaniline (1.5 mmol, 184.8 mg) and NEt<sub>3</sub> (4 mmol, 404.8 mg) in ice-salt bath under argon atmosphere, then reacted at ambient temperature for 8 h afforded 97.3 mg (65%) of **62** as a white solid.

**<sup>1</sup>H NMR (400 MHz, CDCl<sub>3</sub>):**  $\delta$  7.19 (d,  $J$  = 8.9 Hz, 2H), 6.86 (d,  $J$  = 8.7 Hz, 3H), 3.79 (s, 3H), 3.01 (t,  $J$  = 8.0 Hz, 2H), 1.84 - 1.75 (m, 2H), 1.42 – 1.16 (m, 10H), 0.86 (t,  $J$  = 6.8 Hz, 3H).

**<sup>13</sup>C NMR (101 MHz, CDCl<sub>3</sub>):**  $\delta$  157.6, 129.2, 124.1, 114.6, 55.4, 50.9, 31.6, 28.8, 28.1, 23.3, 22.5, 14.0.

**HRMS m/z (ESI)** calcd for C<sub>15</sub>H<sub>24</sub>NO<sub>3</sub>S [M-H]<sup>-</sup> 298.1477, found: 298.1478.

***N*-(4-(dimethylamino)phenyl)octane-1-sulfonamide (63) :**

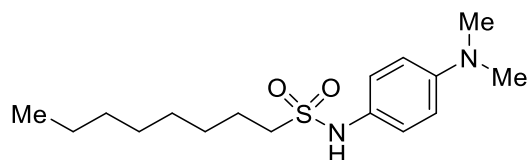

**63**

The reaction of octane-1-thiol (0.50 mmol, 73.1 mg), DMSO (1.75 mmol, 120  $\mu$ L), HBr (AcOH solution, 33% w/w, 0.75 mmol, 120  $\mu$ L), Ni(OTf)<sub>2</sub> (0.05 mmol, 17.8 mg) in DCM (2 mL) at 40 °C for 12 h, followed by added dropwise into DCM (1 mL) solution of *N,N*-dimethylbenzene-1,4-diamine (1.5 mmol, 204.3 mg) and NEt<sub>3</sub> (4 mmol, 404.8 mg) in ice-salt bath under argon atmosphere, then reacted at ambient temperature for 8 h afforded 90.6 mg (58%) of **63** as a yellow solid.

**<sup>1</sup>H NMR (400 MHz, CDCl<sub>3</sub>):**  $\delta$  7.13 (d,  $J$  = 8.9 Hz, 2H), 6.67 (d,  $J$  = 8.9 Hz, 2H), 6.56 (s, 1H), 2.99 (t,  $J$  = 8.0 Hz, 2H), 2.94 (s, 6H), 1.84 – 1.76 (m, 2H), 1.39 – 1.31 (m, 2H), 1.24 (s, 8H), 0.86 (t,  $J$  = 6.8 Hz, 3H).

**<sup>13</sup>C NMR (101 MHz, CDCl<sub>3</sub>):**  $\delta$  149.1, 125.0, 112.9, 50.6, 40.6, 31.6, 28.9, 28.8, 28.1, 23.4, 22.5, 14.0.

**HRMS m/z (ESI)** calcd for C<sub>16</sub>H<sub>29</sub>N<sub>2</sub>O<sub>2</sub>S [M+H]<sup>+</sup> 313.1950, found: 313.1955.

***N*-(4-(tert-butyl)phenyl)octane-1-sulfonamide (64) :**

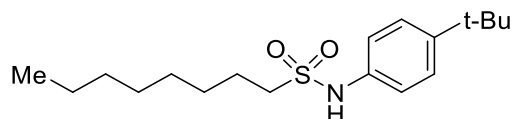

**64**

The reaction of octane-1-thiol (0.50 mmol, 73.1 mg), DMSO (1.75 mmol, 120  $\mu$ L), HBr (AcOH solution, 33% w/w, 0.75 mmol, 120  $\mu$ L), Ni(OTf)<sub>2</sub> (0.05 mmol, 17.8 mg) in DCM (2 mL) at 40 °C for 12 h, followed by added dropwise into DCM (1 mL) solution of 4-(tert-butyl)aniline (1.5 mmol, 223.8 mg) and NEt<sub>3</sub> (4 mmol, 404.8 mg) in ice-salt bath under argon atmosphere, then reacted at ambient temperature for 8 h afforded 108 mg (54%) of **64** as a yellow solid.

**<sup>1</sup>H NMR (400 MHz, CDCl<sub>3</sub>):** δ 7.35 (d, *J* = 7.9 Hz, 2H), 7.15 (d, *J* = 8.0 Hz, 2H), 6.74 (s, 1H), 3.07 (t, *J* = 8.0 Hz, 2H), 1.85 – 1.77 (m, 2H), 1.36 (s, 2H), 1.30 (s, 9H), 1.23 (s, 8H), 0.86 (t, *J* = 6.4 Hz, 3H).

**<sup>13</sup>C NMR (101 MHz, CDCl<sub>3</sub>):** δ 148.2, 134.0, 126.4, 120.6, 51.4, 34.4, 31.6, 31.2, 28.9, 28.1, 23.4, 22.5, 14.0.

**HRMS m/z (ESI)** calcd for C<sub>18</sub>H<sub>35</sub>N<sub>2</sub>O<sub>2</sub>S [M+H]<sup>+</sup> 343.2419, found: 343.2422.

**2-phenylethane-1-sulfonamide (65)<sup>13</sup> :**

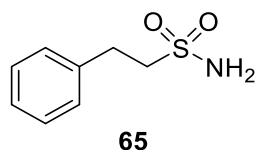

The reaction of 2-phenylethane-1-thiol (0.50 mmol, 69.1 mg), DMSO (1.75 mmol, 120 μL), HBr (AcOH solution, 33% w/w, 0.75 mmol, 120 μL), Ni(OTf)<sub>2</sub> (0.05 mmol, 17.8 mg) in DCM (2 mL) at 40 °C for 12 h, followed by added dropwise into DCM (1 mL) solution of NEt<sub>3</sub> (4 mmol, 404.8 mg) in ice-salt bath under NH<sub>3</sub>(g) atmosphere, then reacted at ambient temperature for 8 h afforded 47.2 mg (51%) of **65** as a white solid.

**<sup>1</sup>H NMR (400 MHz, DMSO-*d*<sub>6</sub>):** δ 7.41 – 7.14 (m, 5H), 6.87 (s, 2H), 3.30 – 3.21 (m, 2H), 3.05 – 2.95 (m, 2H).

**<sup>13</sup>C NMR (101 MHz, DMSO-*d*<sub>6</sub>):** δ 139.1, 128.9, 128.7, 126.8, 55.9, 30.0.

**MS m/z (ESI)** calcd for C<sub>8</sub>H<sub>10</sub>NO<sub>2</sub>S [M-H]<sup>-</sup> 184.04, found: 184.04.

**octane-1-sulfonamide (66)<sup>14</sup> :**

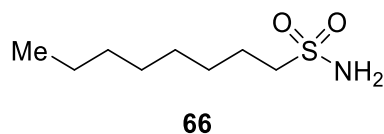

The reaction of octane-1-thiol (0.50 mmol, 73.1 mg), DMSO (1.75 mmol, 120 μL), HBr (AcOH solution, 33% w/w, 0.75 mmol, 120 μL), Ni(OTf)<sub>2</sub> (0.05 mmol, 17.8 mg) in DCM (2 mL) at 40 °C for 12 h, followed by added dropwise into DCM (1 mL) solution of NEt<sub>3</sub> (4 mmol, 404.8 mg) in ice-salt bath under NH<sub>3</sub>(g) atmosphere, then reacted at ambient temperature for 8 h afforded 59.0 mg (61%) of **66** as a white solid.

**<sup>1</sup>H NMR (400 MHz, CDCl<sub>3</sub>):** δ 4.97 (s, 2H), 3.10 (t, *J* = 8.0 Hz, 2H), 1.88 – 1.76 (m, 2H), 1.48 – 1.38 (m, 2H), 1.36 – 1.22 (m, 8H), 0.93 – 0.82 (m, 3H).

**<sup>13</sup>C NMR (101 MHz, CDCl<sub>3</sub>):** δ 55.2, 31.6, 29.0, 28.9, 28.1, 23.8, 22.5, 14.0.

**MS m/z (ESI)** calcd for C<sub>8</sub>H<sub>18</sub>NO<sub>2</sub>S [M-H]<sup>-</sup> 192.11, found: 192.11.

***N*-(((1*R*,4*aS*,10*aR*)-7-isopropyl-1,4*a*-dimethyl-1,2,3,4,4*a*,9,10,10*a*-octahydrophenanthren-1-yl)methyl)octane-1-sulfonamide (67) :**

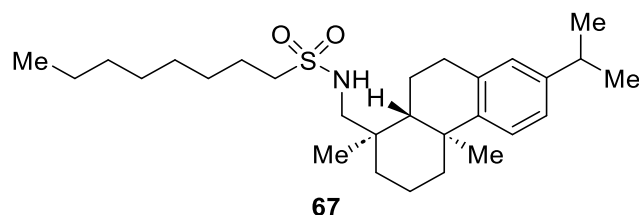

The solution of thiol **1** (0.50 mmol, 73.1 mg), Ni(OTf)<sub>2</sub> (0.05 mmol, 17.8 mg), DMSO (1.75 mmol, 136.7 mg) and HBr (AcOH solution, 33% w/w, 0.75 mmol, 120 μL) in anhydrous DCM (2.0 mL) was heated at 40 °C for 12 h. After the termination of the reaction, the reaction mixture was added dropwise into DCM (1 mL) solution of dehydroabietylamine (1.5 mmol, 426.7 mg) and NEt<sub>3</sub> (4 mmol, 404.8 mg) in ice-salt bath, then reacted for another 8 h to afford 87.7 mg (38%) of **67** as a white solid.

**<sup>1</sup>H NMR (400 MHz, CDCl<sub>3</sub>)** δ 7.17 (d, *J* = 8.2 Hz, 1H), 7.00 (dd, *J* = 8.1, 2.0 Hz, 1H), 6.89 (d, *J* = 2.0 Hz, 1H), 4.22 (t, *J* = 6.9 Hz, 1H), 3.01 – 2.96 (m, 3H), 2.93 – 2.89 (m, 2H), 2.89 – 2.81 (m, 2H), 2.34 – 2.27 (m, 1H), 1.80 – 1.75 (m, 4H), 1.74 – 1.65 (m, 2H), 1.52 (dd, *J* = 10.9, 3.8 Hz, 1H), 1.51 – 1.49 (m, 1H), 1.43 – 1.36 (m, 4H), 1.31 – 1.27 (m, 8H), 1.24 (s, 3H), 1.22 (d, *J* = 1.9 Hz, 6H), 0.97 (s, 3H), 0.92 – 0.88 (m, 3H).

**<sup>13</sup>C NMR (101 MHz, CDCl<sub>3</sub>)** δ 146.9, 145.6, 134.5, 126.8, 124.1, 123.8, 53.9, 52.5, 44.9, 38.2, 37.3, 37.0, 35.8, 33.4, 31.7, 29.8, 29.0, 28.9, 28.3, 25.2, 24.0, 23.9, 23.6, 22.6, 18.8, 18.5, 18.4, 14.0.

**HRMS m/z (ESI)** calcd for C<sub>28</sub>H<sub>51</sub>N<sub>2</sub>O<sub>2</sub>S [M+NH<sub>4</sub>]<sup>+</sup> 479.3671, found: 479.3677.

**ethyl (3*R*,4*R*,5*S*)-4-acetamido-5-(octylsulfonamido)-3-(pentan-3-yloxy)cyclohex-1-ene-1-carboxylate (68) :**



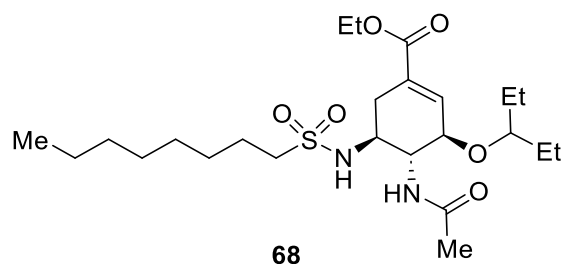

The solution of thiol **1** (0.50 mmol, 73.1 mg), Ni(OTf)<sub>2</sub> (0.05 mmol, 17.8 mg), DMSO (1.75 mmol, 136.7 mg) and HBr (AcOH solution, 33% w/w, 0.75 mmol, 120 μL) in anhydrous DCM (2.0 mL) was heated at 40 °C for 12 h. After the termination of the reaction, solvent was recovered with reduced pressure, then the residuals were dissolved in THF (1.0 mL), and added dropwise into THF (1 mL) solution of oseltamivir (1.5 mmol, 468.6 mg) and NEt<sub>3</sub> (4 mmol, 404.8 mg) in ice-salt bath, then reacted for another 8 h to afford 87.2 mg (36%) of **68** as a white solid.

**<sup>1</sup>H NMR (400 MHz, CDCl<sub>3</sub>):** δ 6.76 (s, 1H), 6.30 (d, *J* = 8.8 Hz, 1H), 5.65 (d, *J* = 8.6 Hz, 1H), 4.19 (q, *J* = 7.1 Hz, 2H), 4.10 (d, *J* = 7.3 Hz, 1H), 3.97 (q, *J* = 8.7 Hz, 1H), 3.69 – 3.59 (m, 1H), 3.38 – 3.33 (m, 1H), 3.04 – 2.93 (m, 2H), 2.76 (dd, *J* = 17.8, 5.1 Hz, 1H), 2.43 (dd, *J* = 17.7, 9.6 Hz, 1H), 2.04 – 1.99 (m, 3H), 1.79 – 1.71 (m, 2H), 1.56 – 1.45 (m, 4H), 1.41 – 1.34 (m, 2H), 1.31 – 1.23 (m, 11H), 0.87 (q, *J* = 7.2 Hz, 9H).

**<sup>13</sup>C NMR (101 MHz, CDCl<sub>3</sub>):** δ 172.0, 165.8, 137.3, 129.0, 82.3, 75.1, 61.0, 54.6, 54.2, 52.4, 32.2, 31.6, 29.0, 28.9, 28.2, 26.1, 25.6, 23.6, 23.3, 22.5, 14.1, 14.0, 9.4, 9.2.

**HRMS m/z (ESI)** calcd for C<sub>24</sub>H<sub>45</sub>N<sub>2</sub>O<sub>6</sub>S [M+H]<sup>+</sup> 489.2998, found: 489.3003.

**1-(2-((2,4-dimethylphenyl)thio)phenyl)-4-(octylsulfonyl)piperazine (69) :**

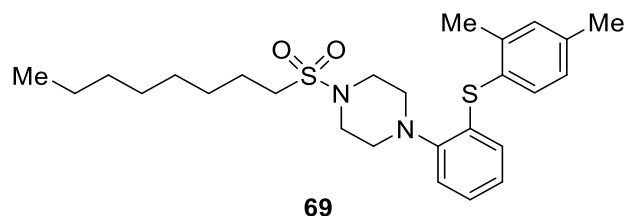

The solution of thiol **1** (0.50 mmol, 73.1 mg), Ni(OTf)<sub>2</sub> (0.05 mmol, 17.8 mg), DMSO (1.75 mmol, 136.7 mg) and HBr (AcOH solution, 33% w/w, 0.75 mmol, 120 μL) in anhydrous DCM (2.0 mL) was heated at 40 °C for 12 h. After the termination of the reaction, the reaction mixture was added dropwise into DCM (1 mL) solution of

vortioxetine (1.5 mmol, 447.7 mg) and  $\text{NEt}_3$  (4 mmol, 404.8 mg) in ice-salt bath, then reacted for another 8 h to afford 152.3 mg (64%) of **69** as a white solid.

**$^1\text{H}$  NMR (400 MHz,  $\text{CDCl}_3$ ):**  $\delta$  7.36 (d,  $J = 7.8$  Hz, 1H), 7.16 (s, 1H), 7.12 – 7.06 (m, 1H), 7.06 – 6.99 (m, 2H), 6.93 – 6.86 (m, 1H), 6.52 (dd,  $J = 7.8, 1.0$  Hz, 1H), 3.47 (t,  $J = 4.4$  Hz, 4H), 3.14 (t,  $J = 4.6$  Hz, 4H), 2.99 – 2.89 (m, 2H), 2.34 (d,  $J = 20.4$  Hz, 6H), 1.91 – 1.79 (m, 2H), 1.47 – 1.38 (m, 2H), 1.34 – 1.25 (m, 8H), 0.88 (t,  $J = 6.8$  Hz, 3H).

**$^{13}\text{C}$  NMR (101 MHz,  $\text{CDCl}_3$ ):**  $\delta$  148.2, 142.1, 139.2, 136.0, 134.4, 131.6, 127.7, 127.4, 126.2, 125.5, 124.9, 120.0, 51.3, 48.8, 46.2, 31.6, 28.9, 28.8, 28.4, 22.9, 22.5, 21.1, 20.4, 13.9.

**HRMS  $m/z$  (ESI)** calcd for  $\text{C}_{26}\text{H}_{39}\text{N}_2\text{O}_2\text{S}_2$   $[\text{M}+\text{H}]^+$  475.2453, found. 475.2457.

**octane-1-sulfonyl fluoride (70)<sup>15</sup> :**

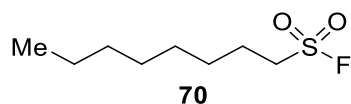

The reaction of octane-1-thiol (0.50 mmol, 73.1 mg), DMSO (1.75 mmol, 120  $\mu\text{L}$ ), HBr (AcOH solution, 33% w/w, 0.75 mmol, 120  $\mu\text{L}$ ),  $\text{Ni}(\text{OTf})_2$  (0.05 mmol, 17.8 mg) in DCM (2 mL) at 40  $^\circ\text{C}$  for 12 h, followed by added dropwise into DCM (1 mL) solution of TBAF (2.5 mmol, 653.7 mg) and  $\text{NEt}_3$  (3.5 mmol, 354.2 mg) in ice-salt bath, then reacted at ambient temperature for 8 h afforded 58.9 mg (60%) of **70** as a colorless oil.

**$^1\text{H}$  NMR (400 MHz,  $\text{CDCl}_3$ ):**  $\delta$  3.41 – 3.30 (m, 2H), 2.00 – 1.89 (m, 2H), 1.53 – 1.43 (m, 2H), 1.35 – 1.25 (m, 8H), 0.89 (t,  $J = 6.8$  Hz, 3H).

**$^{13}\text{C}$  NMR (101 MHz,  $\text{CDCl}_3$ ):**  $\delta$  50.9 (d,  $J = 16.2$  Hz), 31.6, 28.8, 28.7, 27.8, 23.3, 22.5, 14.0.

**$^{19}\text{F}$  NMR (376 MHz,  $\text{CDCl}_3$ ):**  $\delta$  53.27 .

**MS  $m/z$  (EI)** calcd for  $\text{C}_8\text{H}_{17}\text{FO}_2\text{S}$   $[\text{M}]^+$  196.09, found: 196.11.

**octane-1-sulfonyl azide (71)<sup>16</sup> :**

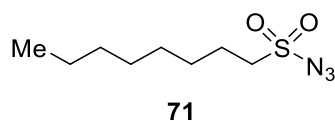

The solution of thiol **1** (0.50 mmol, 73.1 mg), Ni(OTf)<sub>2</sub> (0.05 mmol, 17.8 mg), DMSO (1.75 mmol, 136.7 mg) and HBr (AcOH solution, 33% w/w, 0.75 mmol, 120 μL) in anhydrous DCM (2.0 mL) was heated at 40 °C for 12 h. After the termination of the reaction, the reaction mixture was added dropwise into DCM (1 mL) solution of azidotrimethylsilane (1.5 mmol, 172.8 mg) and NEt<sub>3</sub> (4 mmol, 404.8 mg) in ice-salt bath, then reacted for another 8 h to afford 84.8 mg (77%) of **71** as a yellow oil.

**<sup>1</sup>H NMR (400 MHz, CDCl<sub>3</sub>):** δ 3.36 – 3.27 (m, 2H), 1.97 – 1.87 (m, 2H), 1.51 – 1.42 (m, 2H), 1.37 – 1.25 (m, 8H), 0.93 – 0.86 (m, 3H).

**<sup>13</sup>C NMR (101 MHz, CDCl<sub>3</sub>):** δ 55.9, 31.5, 28.8, 27.9, 23.3, 22.5, 13.9.

**MS m/z (EI)** calcd for C<sub>8</sub>H<sub>17</sub>N<sub>3</sub>O<sub>2</sub>S [M]<sup>+</sup> 219.10, found: 219.25.

#### phenethyl octane-1-sulfonate (**72**) :

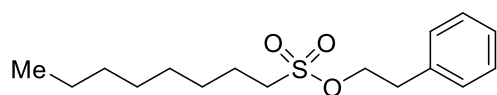

**72**

The reaction of octane-1-thiol (0.50 mmol, 73.1 mg), DMSO (1.75 mmol, 120 μL), HBr (AcOH solution, 33% w/w, 0.75 mmol, 120 μL), Ni(OTf)<sub>2</sub> (0.05 mmol, 17.8 mg) in DCM (2 mL) at 40 °C for 12 h, followed by added dropwise into DCM (1 mL) solution of 2-phenylethan-1-ol (1.5 mmol, 183.3 mg) and NEt<sub>3</sub> (4 mmol, 404.8 mg) in ice-salt bath, then reacted at ambient temperature for 8 h afforded 98.5 mg (66%) of **72** as a colorless oil.

**<sup>1</sup>H NMR (400 MHz, CDCl<sub>3</sub>):** δ 7.35 – 7.29 (m, 2H), 7.28 – 7.21 (m, 3H), 4.40 (t, *J* = 6.9 Hz, 2H), 3.04 (t, *J* = 6.9 Hz, 2H), 2.93 (t, *J* = 8.0 Hz, 2H), 1.76 – 1.63 (m, 2H), 1.35 – 1.21 (m, 10H), 0.88 (t, *J* = 6.8 Hz, 3H).

**<sup>13</sup>C NMR (101 MHz, CDCl<sub>3</sub>):** δ 136.4, 128.9, 128.5, 126.9, 69.7, 50.3, 35.6, 31.6, 28.8, 28.0, 23.2, 22.5, 14.0.

**HRMS m/z (ESI)** calcd for C<sub>16</sub>H<sub>30</sub>NO<sub>3</sub>S [M+NH<sub>4</sub>]<sup>+</sup> 316.1946, found: 316.1949.

#### 4-phenylbutyl octane-1-sulfonate (**73**) :

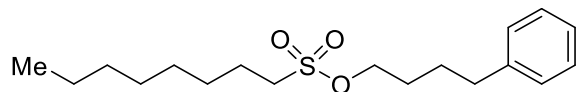

**73**

The reaction of octane-1-thiol (0.50 mmol, 73.1 mg), DMSO (1.75 mmol, 120  $\mu$ L), HBr (AcOH solution, 33% w/w, 0.75 mmol, 120  $\mu$ L), Ni(OTf)<sub>2</sub> (0.05 mmol, 17.8 mg) in DCM (2 mL) at 40 °C for 12 h, followed by added dropwise into DCM (1 mL) solution of 4-phenylbutan-1-ol (1.5 mmol, 225.3 mg) and NEt<sub>3</sub> (4 mmol, 404.8 mg) in ice-salt bath, then reacted at ambient temperature for 8 h afforded 112.6 mg (69%) of **73** as a colorless oil.

**<sup>1</sup>H NMR (400 MHz, CDCl<sub>3</sub>):**  $\delta$  7.34 – 7.23 (m, 2H), 7.23 – 7.12 (m, 3H), 4.21 (t,  $J$  = 5.1 Hz, 2H), 3.06 (t,  $J$  = 8.0 Hz, 2H), 2.66 (t,  $J$  = 6.3 Hz, 2H), 1.89 – 1.68 (m, 6H), 1.46 – 1.37 (m, 2H), 1.28 (s, 8H), 0.88 (t,  $J$  = 6.1 Hz, 3H).

**<sup>13</sup>C NMR (101 MHz, CDCl<sub>3</sub>):**  $\delta$  141.5, 128.4, 128.3, 125.9, 69.3, 50.4, 35.1, 31.6, 28.9, 28.9, 28.7, 28.1, 27.2, 23.4, 22.5, 14.0.

**HRMS m/z (ESI)** calcd for C<sub>18</sub>H<sub>34</sub>NO<sub>3</sub>S [M+NH<sub>4</sub>]<sup>+</sup> 344.2259, found: 344.2257.

**4-methoxyphenyl octane-1-sulfonate (74):**

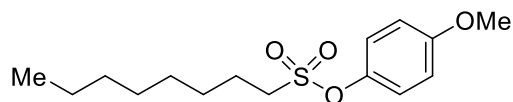

**74**

The reaction of octane-1-thiol (0.50 mmol, 73.1 mg), DMSO (1.75 mmol, 120  $\mu$ L), HBr (AcOH solution, 33% w/w, 0.75 mmol, 120  $\mu$ L), Ni(OTf)<sub>2</sub> (0.05 mmol, 17.8 mg) in DCM (2 mL) at 40 °C for 12 h, followed by added dropwise into DCM (1 mL) solution of 4-methoxyphenol (1.5 mmol, 225.3 mg) and NEt<sub>3</sub> (4 mmol, 404.8 mg) in ice-salt bath under N<sub>2</sub> atmosphere, then reacted at ambient temperature for 8 h afforded 105.1 mg (70%) of **74** as a colorless oil.

**<sup>1</sup>H NMR (400 MHz, CDCl<sub>3</sub>):**  $\delta$  7.19 (d,  $J$  = 7.3 Hz, 2H), 6.90 (d,  $J$  = 7.3 Hz, 2H), 3.80 (s, 3H), 3.20 (t,  $J$  = 8.0 Hz, 2H), 2.01 – 1.89 (m, 2H), 1.51 – 1.40 (m, 2H), 1.40 – 1.20 (m, 8H), 0.89 (t,  $J$  = 6.1 Hz, 3H).

$^{13}\text{C}$  NMR (101 MHz,  $\text{CDCl}_3$ ):  $\delta$  158.3, 142.4, 123.0, 114.8, 55.6, 50.0, 31.6, 28.9, 28.8, 28.1, 23.4, 22.5, 14.0.

HRMS  $m/z$  (ESI) calcd for  $\text{C}_{15}\text{H}_{23}\text{O}_4\text{S}$   $[\text{M}-\text{H}]^-$  299.1317, found: 299.1319.

**10-(4,5-dimethoxy-2-methyl-3,6-dioxocyclohexa-1,4-dien-1-yl)decyloctane-1-sulfonate (75) :**

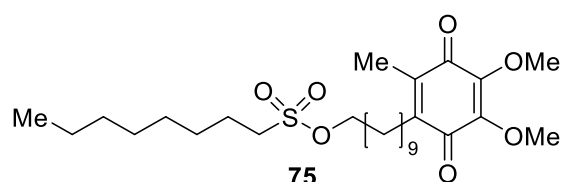

The solution of thiol **1** (0.50 mmol, 73.1 mg),  $\text{Ni}(\text{OTf})_2$  (0.05 mmol, 17.8 mg), DMSO (1.75 mmol, 136.7 mg) and  $\text{HBr}$  (AcOH solution, 33% w/w, 0.75 mmol, 120  $\mu\text{L}$ ) in anhydrous DCM (2.0 mL) was heated at 40  $^\circ\text{C}$  for 12 h. After the termination of the reaction, the reaction mixture was added dropwise into DCM (1 mL) solution of 2-(10-hydroxydecyl)-5,6-dimethoxy-3-methylcyclohexa-2,5-diene-1,4-dione (1.5 mmol, 507.7 mg) and  $\text{NEt}_3$  (4 mmol, 404.8 mg) in ice-salt bath, then reacted for another 8 h to afford 183.1 mg (71%) of **75** as an orange oil.

$^1\text{H}$  NMR (400 MHz,  $\text{CDCl}_3$ ):  $\delta$  4.20 (t,  $J = 6.6$  Hz, 2H), 3.99 (d,  $J = 1.1$  Hz, 6H), 3.11 – 3.04 (m, 2H), 2.47 – 2.42 (t,  $J = 7.4$  Hz, 2H), 2.01 (s, 3H), 1.85 (m, 2H), 1.77 – 1.69 (m, 2H), 1.42 – 1.25 (m, 24H), 0.91 – 0.85 (m, 3H).

$^{13}\text{C}$  NMR (101 MHz,  $\text{CDCl}_3$ ):  $\delta$  184.4, 183.9, 144.1, 144.0, 142.8, 138.4, 69.5, 60.9, 50.1, 31.5, 29.6, 29.1, 28.7, 28.5, 27.9, 26.1, 25.2, 23.3, 22.4, 13.8, 11.7.

HRMS  $m/z$  (ESI) calcd for  $\text{C}_{27}\text{H}_{47}\text{O}_7\text{S}$   $[\text{M}+\text{H}]^+$  515.3042, found: 515.3048.

**(Z)-2-(4-(4-chloro-1,2-diphenylbut-1-en-1-yl)phenoxy)ethyl octane-1-sulfonate (76):**

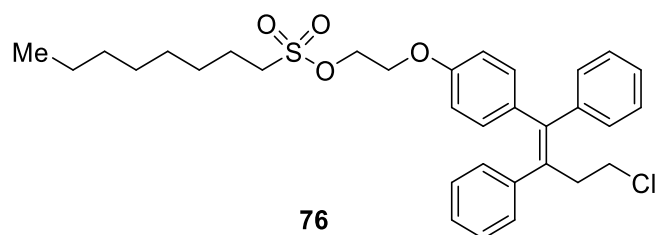

The solution of thiol **1** (0.50 mmol, 73.1 mg), Ni(OTf)<sub>2</sub> (0.05 mmol, 17.8 mg), DMSO (1.75 mmol, 136.7 mg) and HBr (AcOH solution, 33% w/w, 0.75 mmol, 120 μL) in anhydrous DCM (2.0 mL) was heated at 40 °C for 12 h. After the termination of the reaction, the reaction mixture was added dropwise into DCM (1 mL) solution of (*Z*)-2-(4-(4-chloro-1,2-diphenylbut-1-en-1-yl)phenoxy)ethan-1-ol (1.5 mmol, 568.3 mg) and NEt<sub>3</sub> (4 mmol, 404.8 mg) in ice-salt bath, then reacted for another 8 h to afford 172.6 mg (62%) of **76** as a white oil.

**<sup>1</sup>H NMR (400 MHz, CDCl<sub>3</sub>):** δ 7.40 – 7.34 (t, *J* = 7.6 Hz, 2H), 7.29 (t, *J* = 7.0 Hz, 3H), 7.23 – 7.17 (t, *J* = 7.4 Hz, 2H), 7.14 (t, *J* = 6.6 Hz, 3H), 6.80 (d, *J* = 8.7 Hz, 2H), 6.54 (d, *J* = 8.7 Hz, 2H), 4.50 – 4.39 (m, 2H), 4.12 – 4.03 (m, 2H), 3.41 (t, *J* = 7.4 Hz, 2H), 3.14 – 3.06 (m, 2H), 2.92 (t, *J* = 7.4 Hz, 2H), 1.89 – 1.73 (m, 2H), 1.42 – 1.33 (m, 2H), 1.30 – 1.18 (m, 8H), 0.87 (t, *J* = 6.7 Hz, 3H).

**<sup>13</sup>C NMR (101 MHz, CDCl<sub>3</sub>):** δ 156.1, 142.6, 141.4, 140.8, 135.6, 135.5, 131.7, 129.4, 129.3, 128.3, 128.2, 126.9, 126.6, 113.4, 67.4, 65.5, 50.6, 42.7, 38.4, 31.6, 28.8, 28.7, 28.0, 23.3, 22.5, 14.0.

**HRMS *m/z* (ESI)** calcd for C<sub>32</sub>H<sub>43</sub>ClNO<sub>4</sub>S [M+NH<sub>4</sub>]<sup>+</sup> 572.2601, found: 572.2609.

**4-methylbenzenesulfonamide (**77**)<sup>17</sup> :**

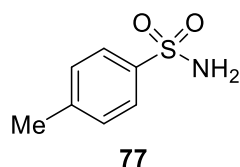

**<sup>1</sup>H NMR (400 MHz, DMSO-*d*<sub>6</sub>):** δ 7.71 (d, *J* = 8.1 Hz, 2H), 7.36 (d, *J* = 8.0 Hz, 2H), 7.27 (s, 2H), 2.37 (s, 3H).

**<sup>13</sup>C NMR (101 MHz, DMSO-*d*<sub>6</sub>):** δ 141.8, 141.4, 129.2, 125.5, 20.8.

**MS *m/z* (ESI)** calcd for C<sub>7</sub>H<sub>8</sub>NO<sub>2</sub>S [M-H]<sup>-</sup> 170.03, found: 170.03.

**1,2-dioctyldisulfane (**78**)<sup>18</sup> :**

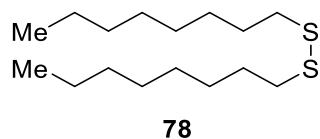

**<sup>1</sup>H NMR (400 MHz, CDCl<sub>3</sub>):** δ 2.68 (t, *J* = 7.6 Hz, 4H), 1.72 – 1.63 (m, 4H), 1.38 (s, 4H), 1.28 (s, 16H), 0.88 (t, *J* = 6.7 Hz, 6H).

**<sup>13</sup>C NMR (101 MHz, CDCl<sub>3</sub>):** δ 39.2, 31.8, 29.22, 29.20, 29.1, 28.5, 22.6, 14.0.

**S-octyl octane-1-sulfonothioate (79)<sup>19</sup> :**

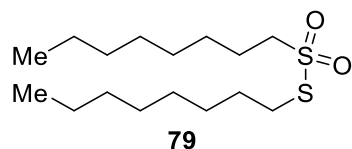

**<sup>1</sup>H NMR (400 MHz, CDCl<sub>3</sub>):** δ 3.28 (t, *J* = 7.6 Hz, 2H), 3.12 (t, *J* = 7.4 Hz, 2H), 1.97 – 1.84 (m, 2H), 1.78 – 1.67 (m, 2H), 1.48 – 1.37 (m, 4H), 1.27 (s, 16H), 0.88 (t, *J* = 6.7 Hz, 6H).

**<sup>13</sup>C NMR (101 MHz, CDCl<sub>3</sub>):** δ 62.7, 36.2, 31.7, 31.6, 29.6, 29.0, 28.98, 28.92, 28.89, 28.5, 27.9, 23.5, 22.59, 22.57, 14.05, 14.04.

## References

1. M. Yuki, K. Sakata, S. Kikuchi, H. Kawai, T. Takahashi, M. Ando, K. Nakajima and Y. Nishibayashi, *Chem. - Eur. J.*, 2017, **23**, 1007-1012.
2. J. W. J. Bosco, B. R. Raju and A. K. Saikia, *Synth. Commun.*, 2004, **34**, 2849-2855.
3. A. Gayet, C. Bolea and P. G. Andersson, *Org. Biomol. Chem.*, 2004, **2**, 1887-1893.
4. M. Jereb and L. Hribernik, *Green. Chem.*, 2017, **19**, 2286-2295.
5. R. Chen, S. Xu, F. Shen, C. Xu, K. Wang, Z. Wang and L. Liu, *Molecules*, 2021, **26**, 5551.
6. T. Kataoka, T. Iwama, T. Setta and A. Takagi, *Synthesis*, 1998, **4**, 423-426.
7. J. F. King and D. J. H. Smith, *J. Am. Chem. Soc.*, 1967, **89**, 4803-4804.
8. C. Silva-Cuevas, C. Perez-Arrieta, L. A. Polindara-Garcia and J. Armando Lujan-Montelongo, *Tetrahedron Lett.*, 2017, **58**, 2244-2247.
9. S. Lee, O. Cil, P. M. Haggie and A. S. Verkman, *J. Med. Chem.*, 2019, **62**, 8330-8337.

10. S. Madabhushi, R. Jillella, V. Sriramoju and R. Singh, *Green. Chem.*, 2014, **16**, 3125-3131.
11. N. Shohji, T. Kawaji and S. Okamoto, *Org. Lett.*, 2011, **13**, 2626-2629.
12. R. A. Abramovitch, W. D. Holcomb and S. Wake, *J. Am. Chem. Soc.*, 1981, **103**, 1525-1533.
13. J. A. Andrews, L. R. E. Pantaine, C. F. Palmer, D. L. Poole and M. C. Willis, *Org. Lett.*, 2021, **23**, 8488-8493.
14. D. Zhong, D. Wu, Y. Zhang, Z. Lu, M. Usman, W. Liu, X. Lu and W.-B. Liu, *Org. Lett.*, 2019, **21**, 5808-5812.
15. P. Wang, H. Zhang, M. Zhao, S. Ji, L. Lin, N. Yang, X. Nie, J. Song and S. Liao, *Angew. Chem. Int. Ed.*, 2022, **61**, e202207684.
16. S. Azeez, P. Chaudhary, P. Sureshbabu, S. Sabiah and J. Kandasamy, *Org. Biomol. Chem.*, 2018, **16**, 8280-8285.
17. T. Q. Davies, M. J. Tilby, D. Skolc, A. Hall and M. C. Willis, *Org. Lett.*, 2020, **22**, 9495-9499.
18. E. Rattanangkool, W. Krailat, T. Vilaivan, P. Phuwapraisirisan, M. Sukwattanasinitt and S. Wacharasindhu, *Eur. J. Org. Chem.*, 2014, **2014**, 4795-4804.
19. T. X. T. Luu, T.-T. T. Nguyen, T. N. Le, J. Spanget-Larsen and F. Duus, *Journal of Sulfur Chemistry*, 2015, **36**, 340-350.



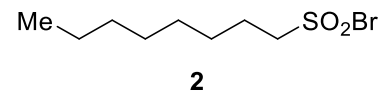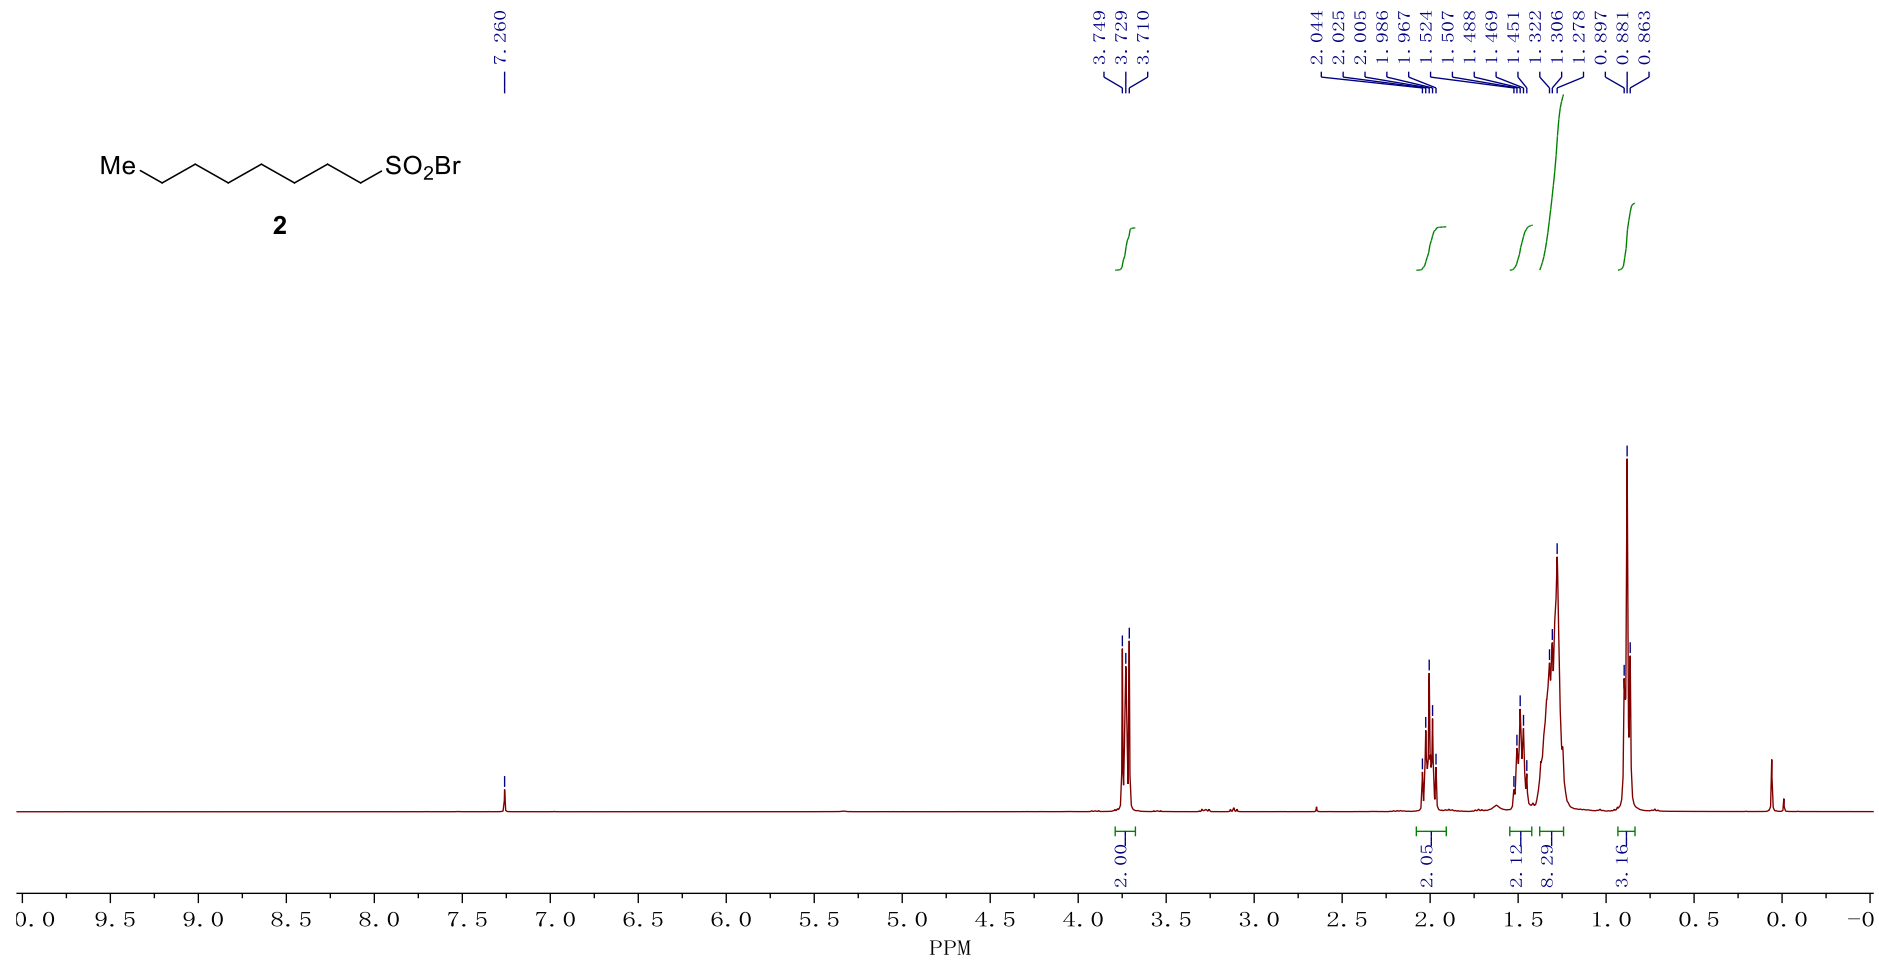

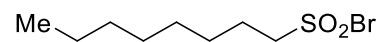

2

77.367 CDC13  
77.049 CDC13  
76.731 CDC13

69.704

31.616  
28.856  
28.822  
27.279  
24.608  
22.552

14.034

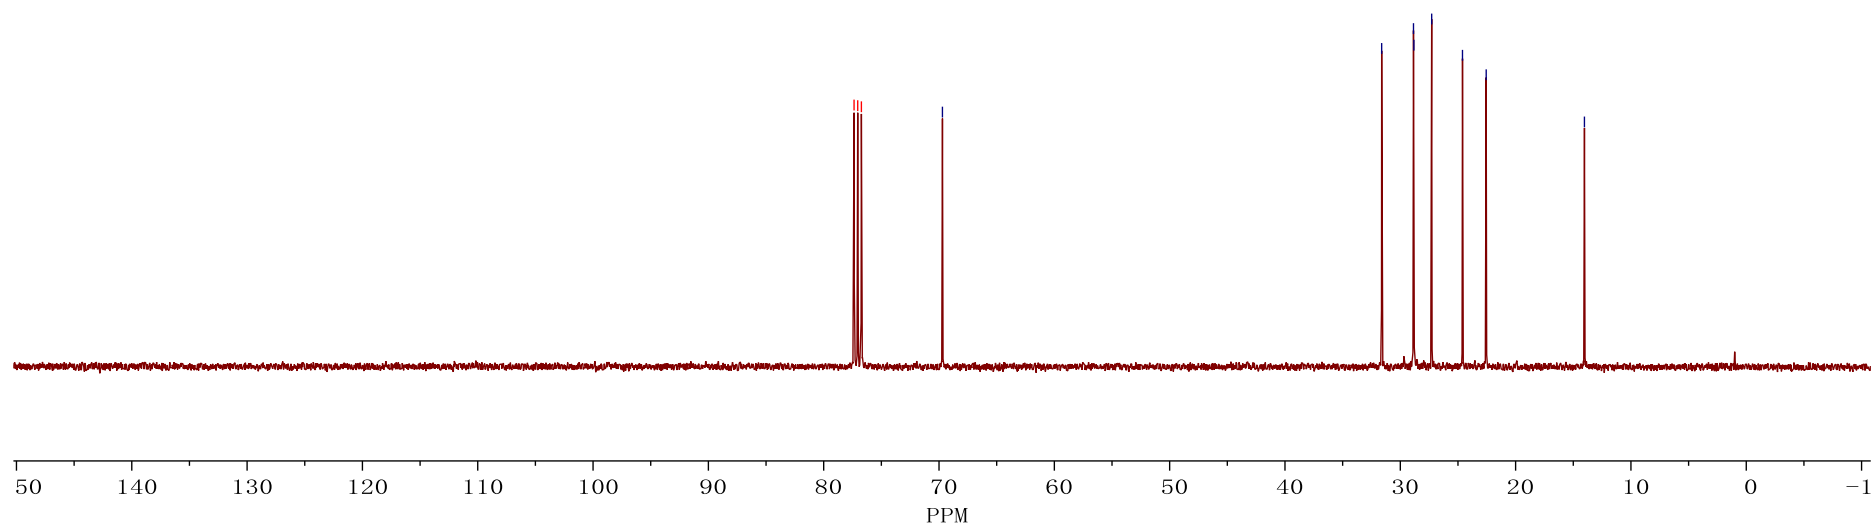

S50

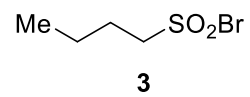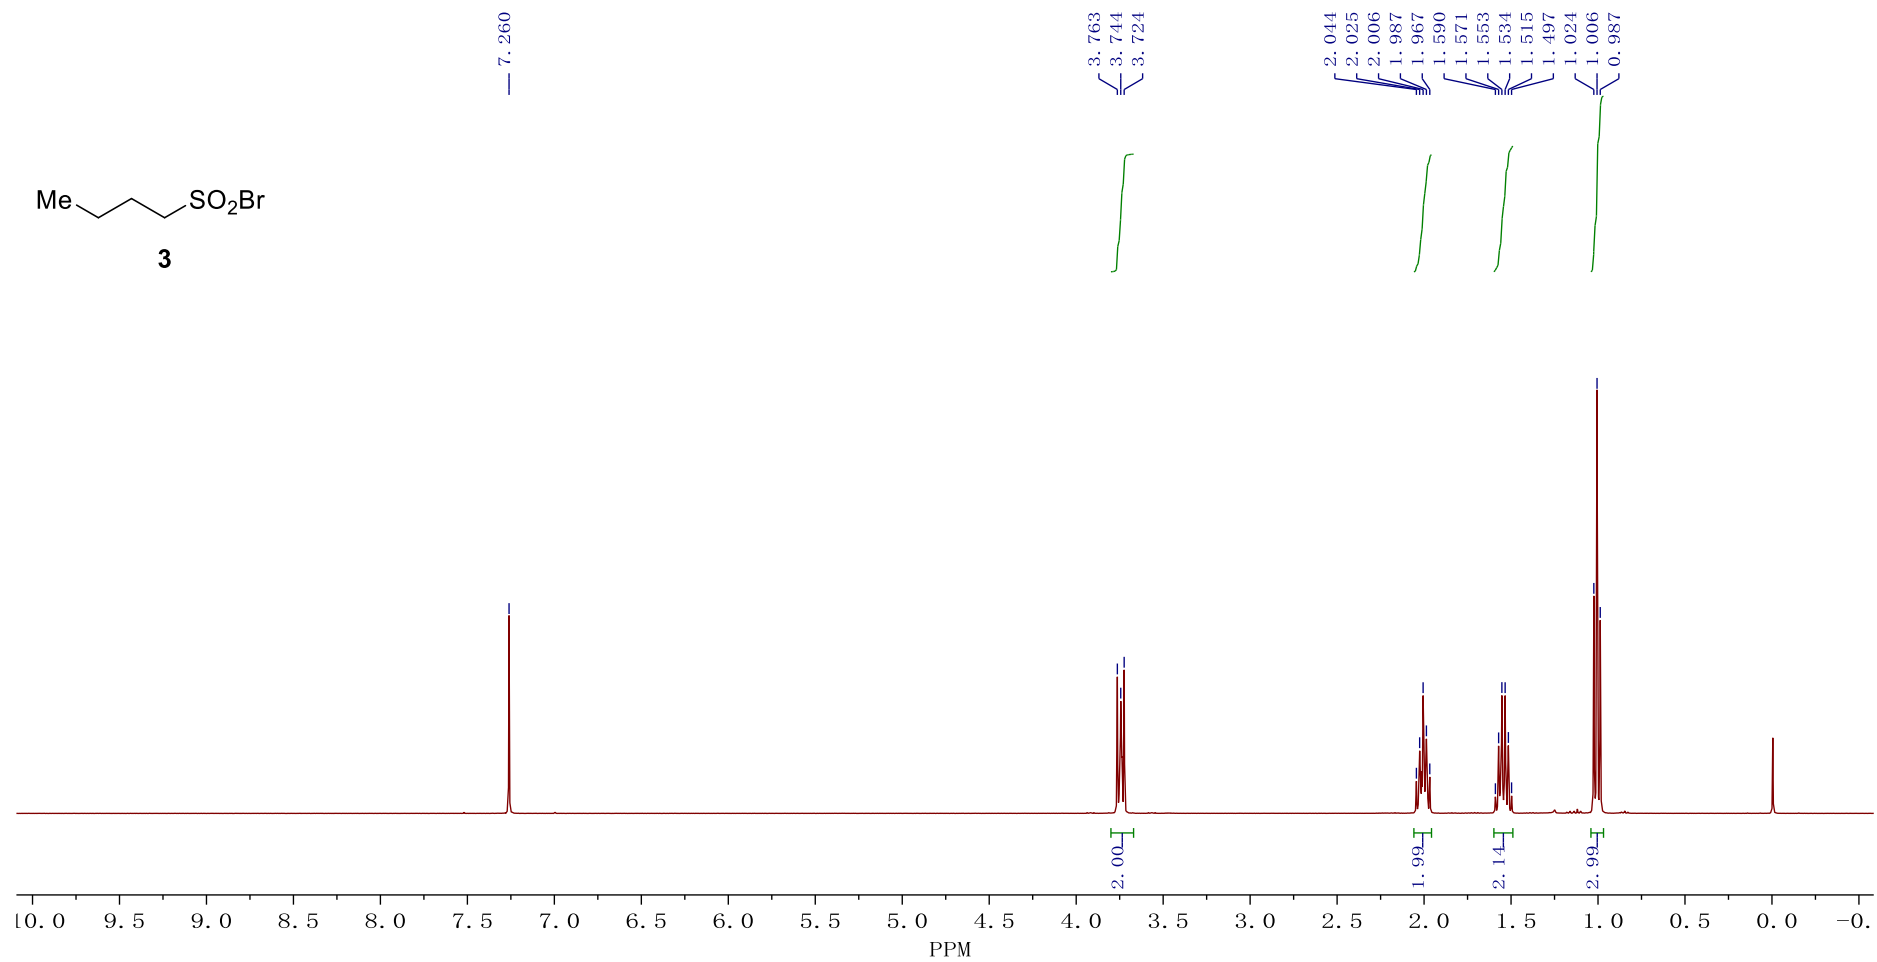

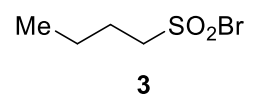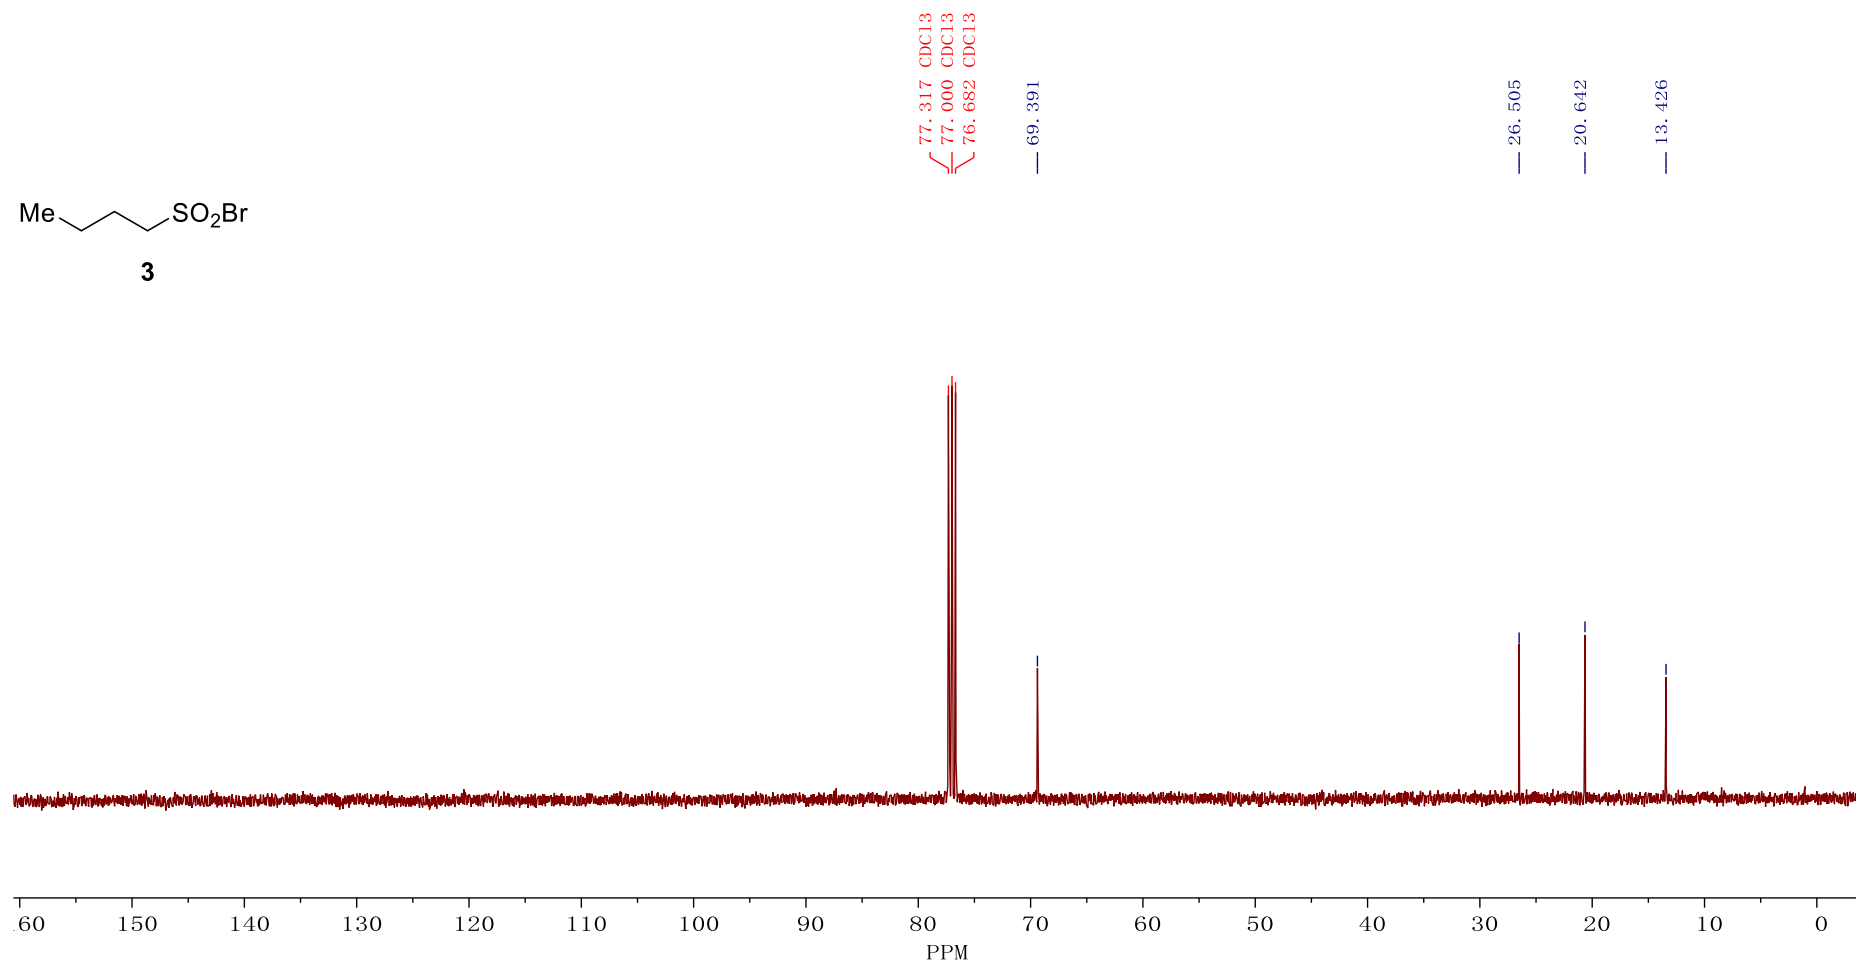

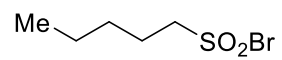

4

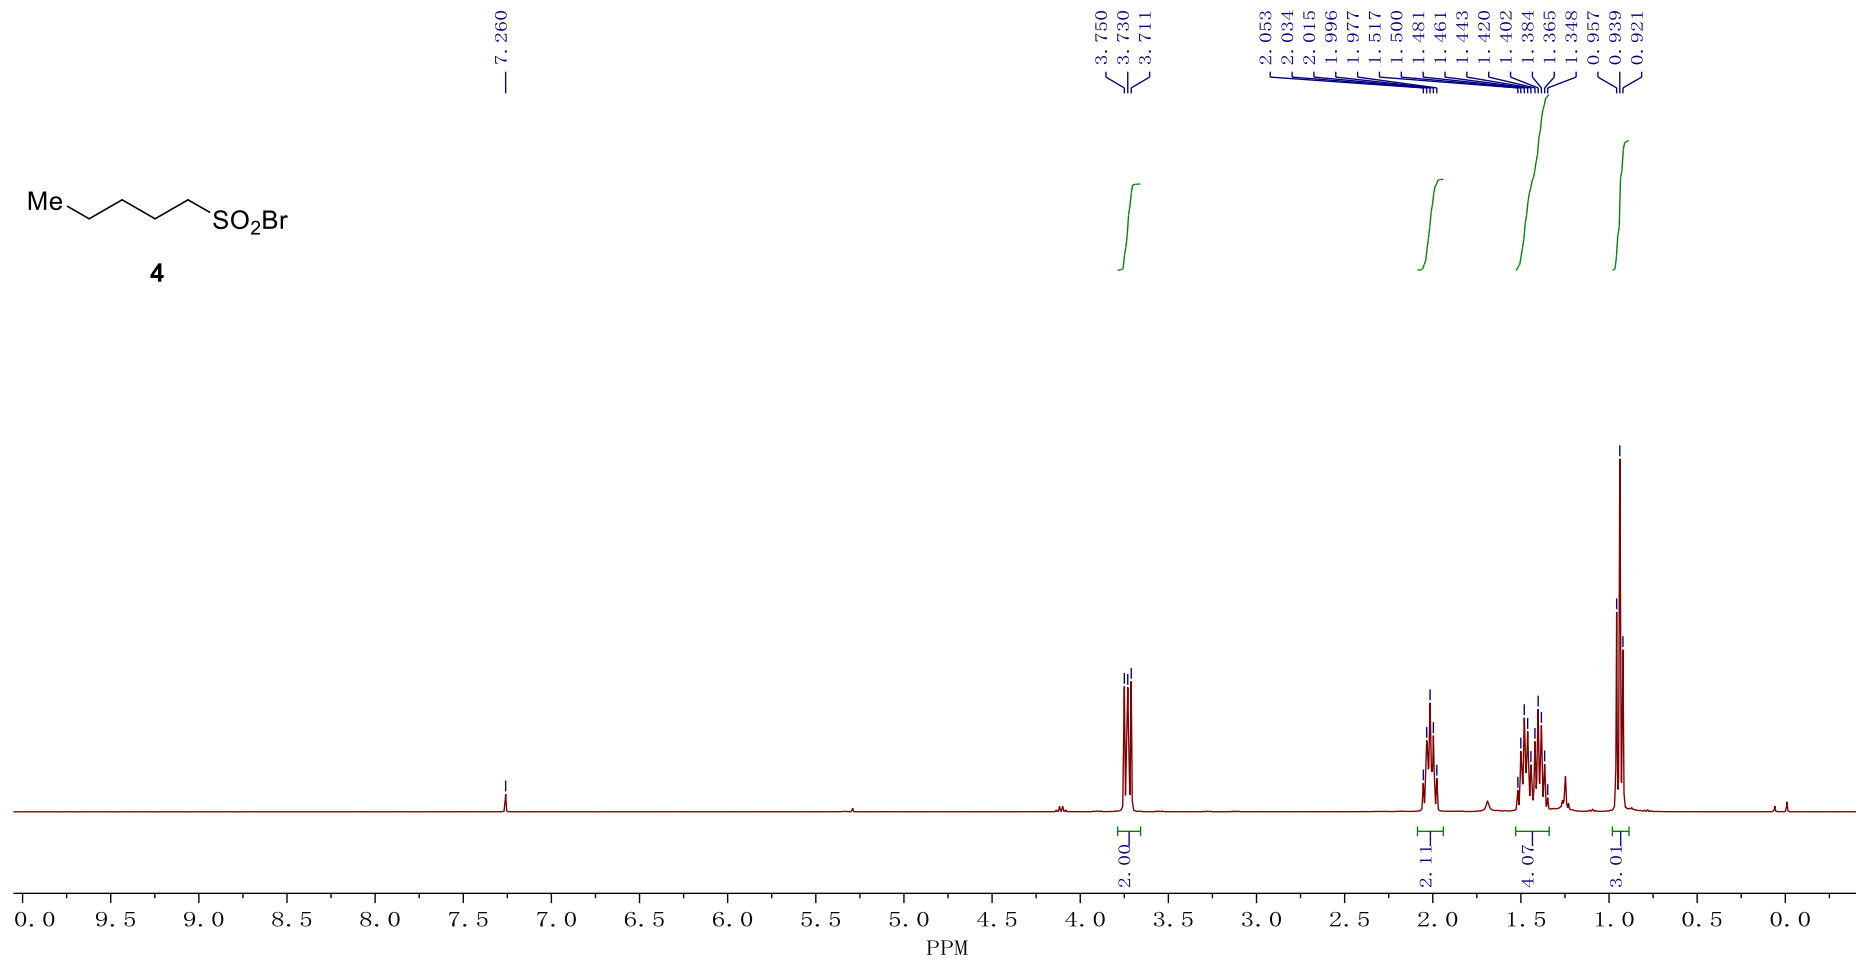

S53

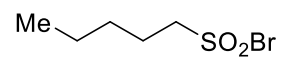

4

77.318 CDC13  
77.000 CDC13  
76.683 CDC13

69.642

29.286

24.262

21.983

13.578

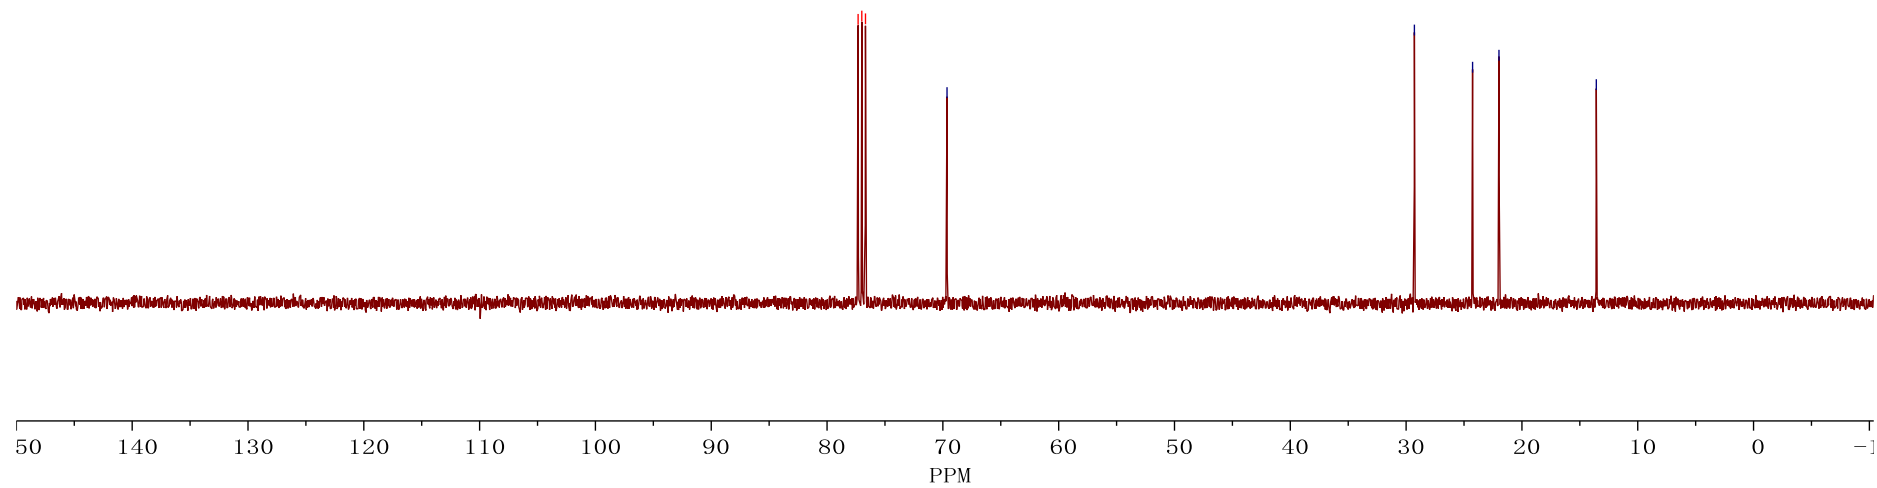

S54

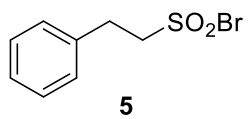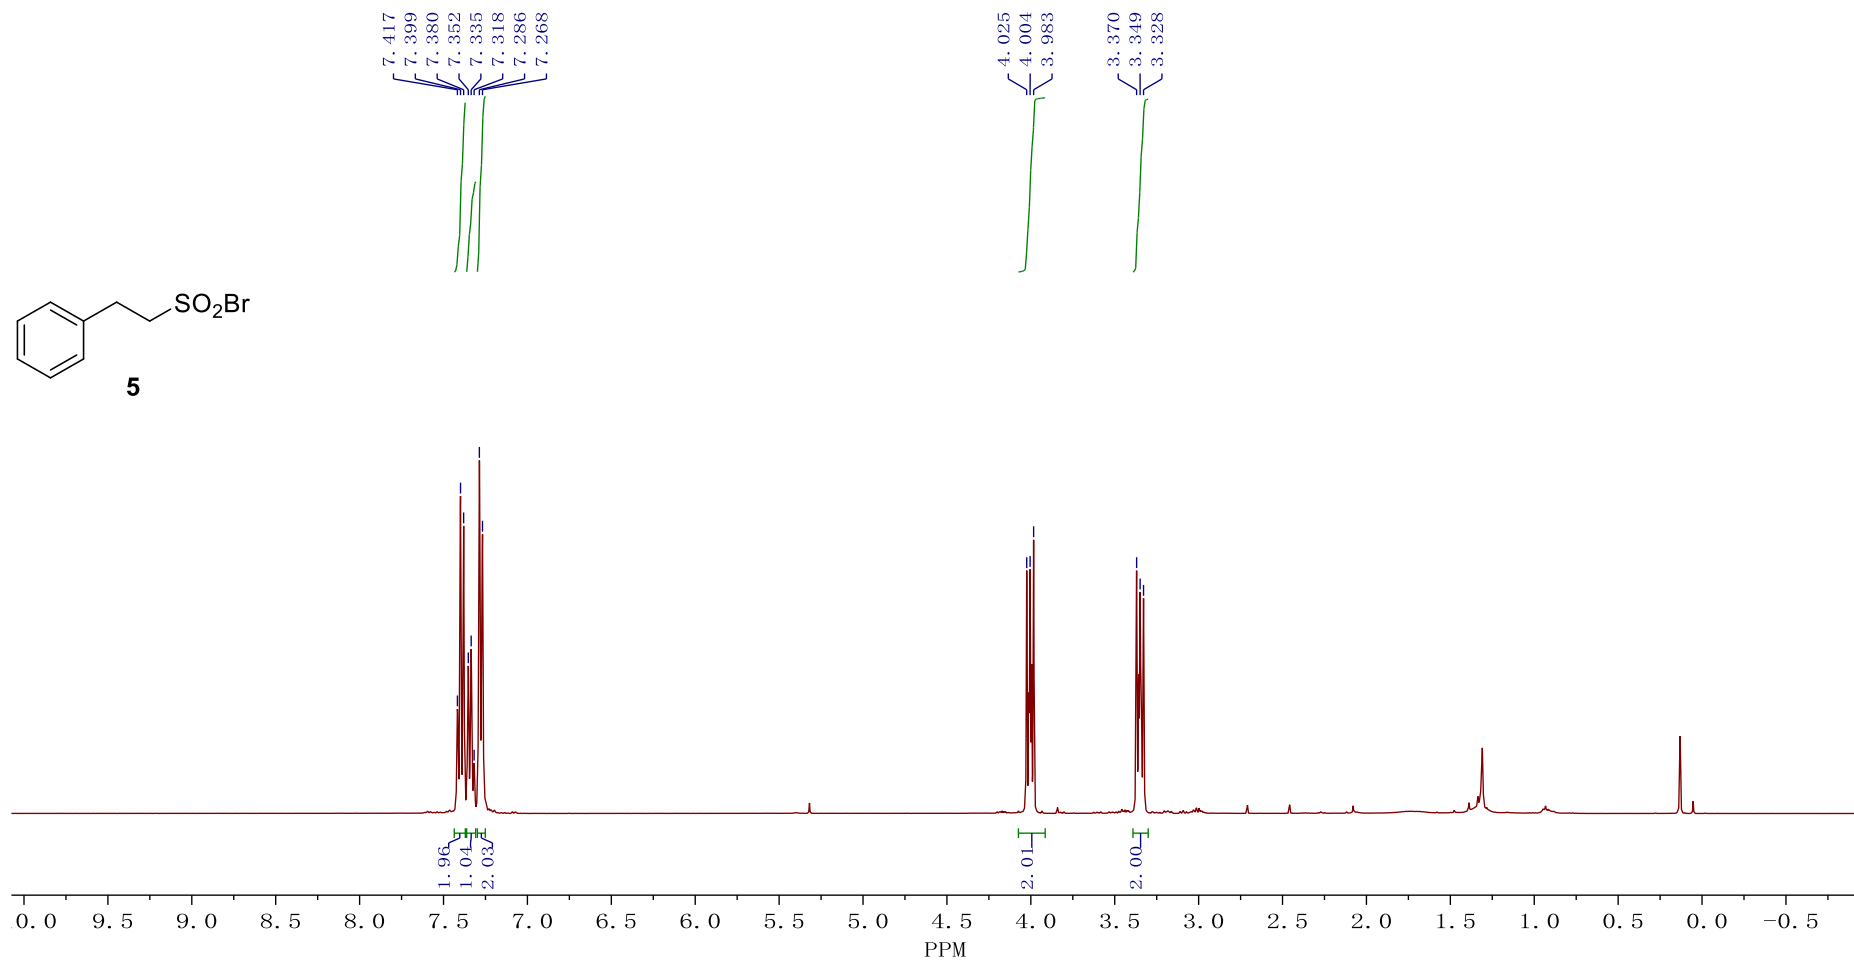

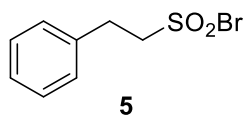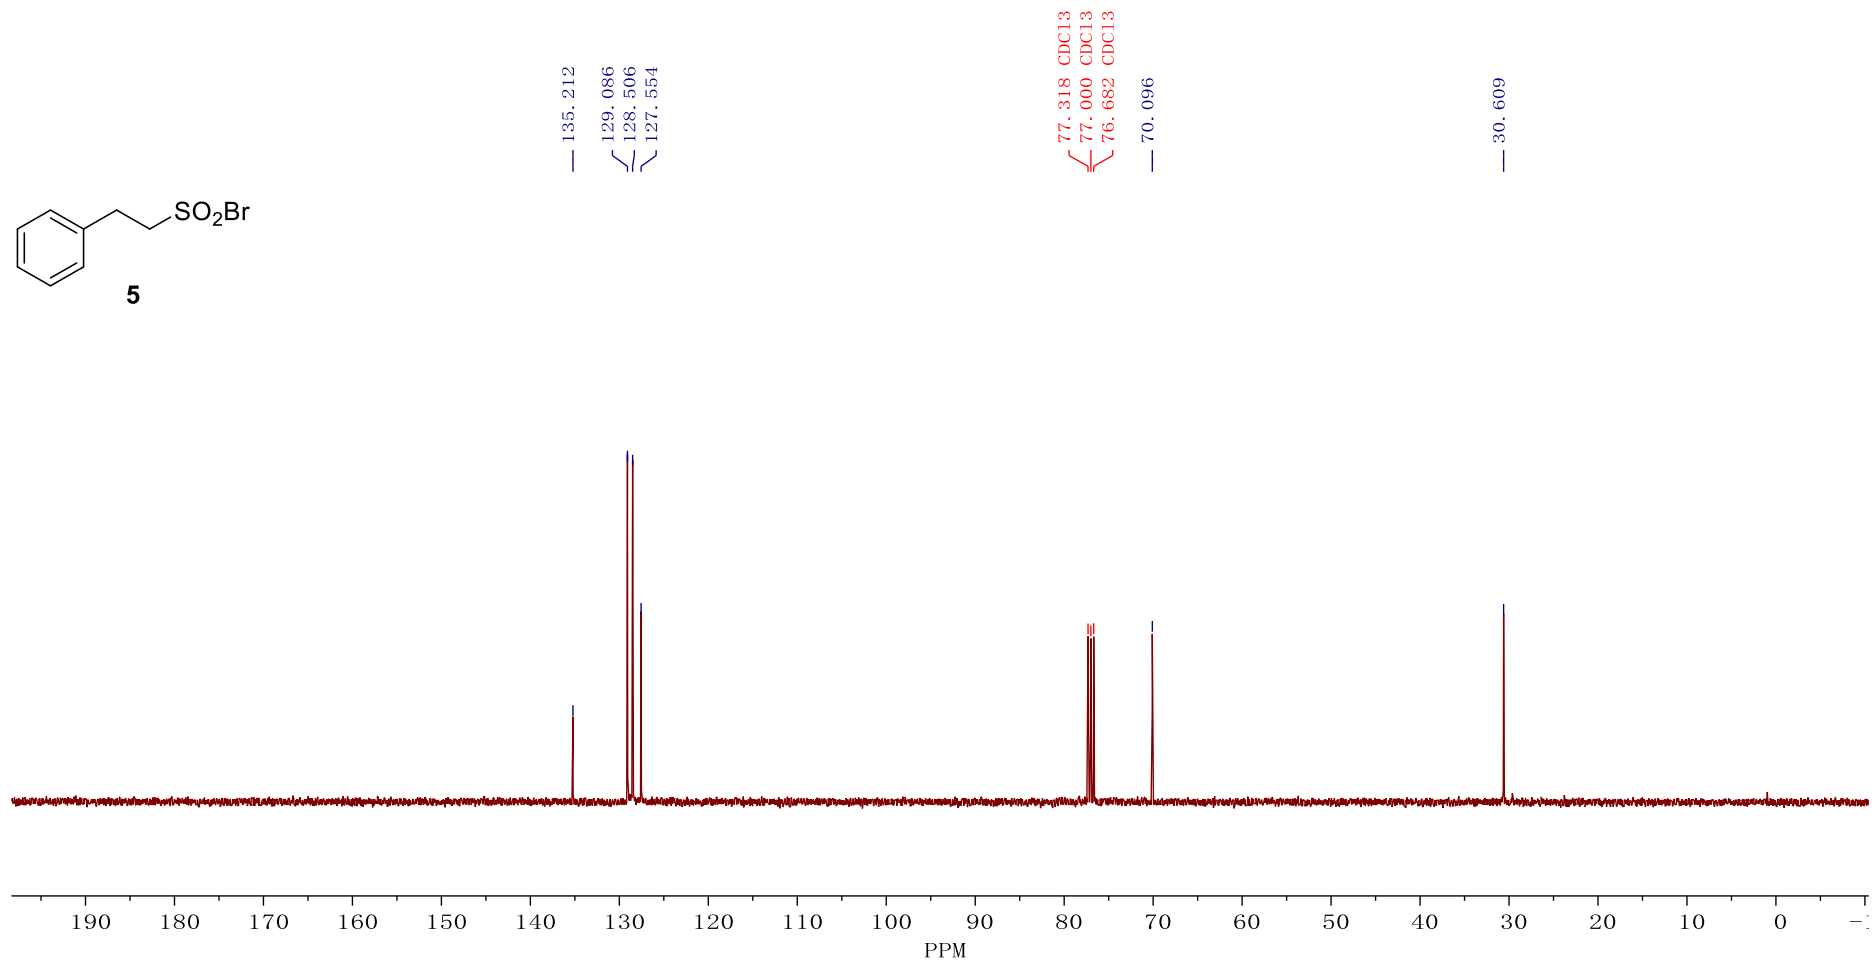



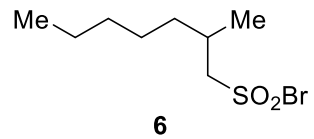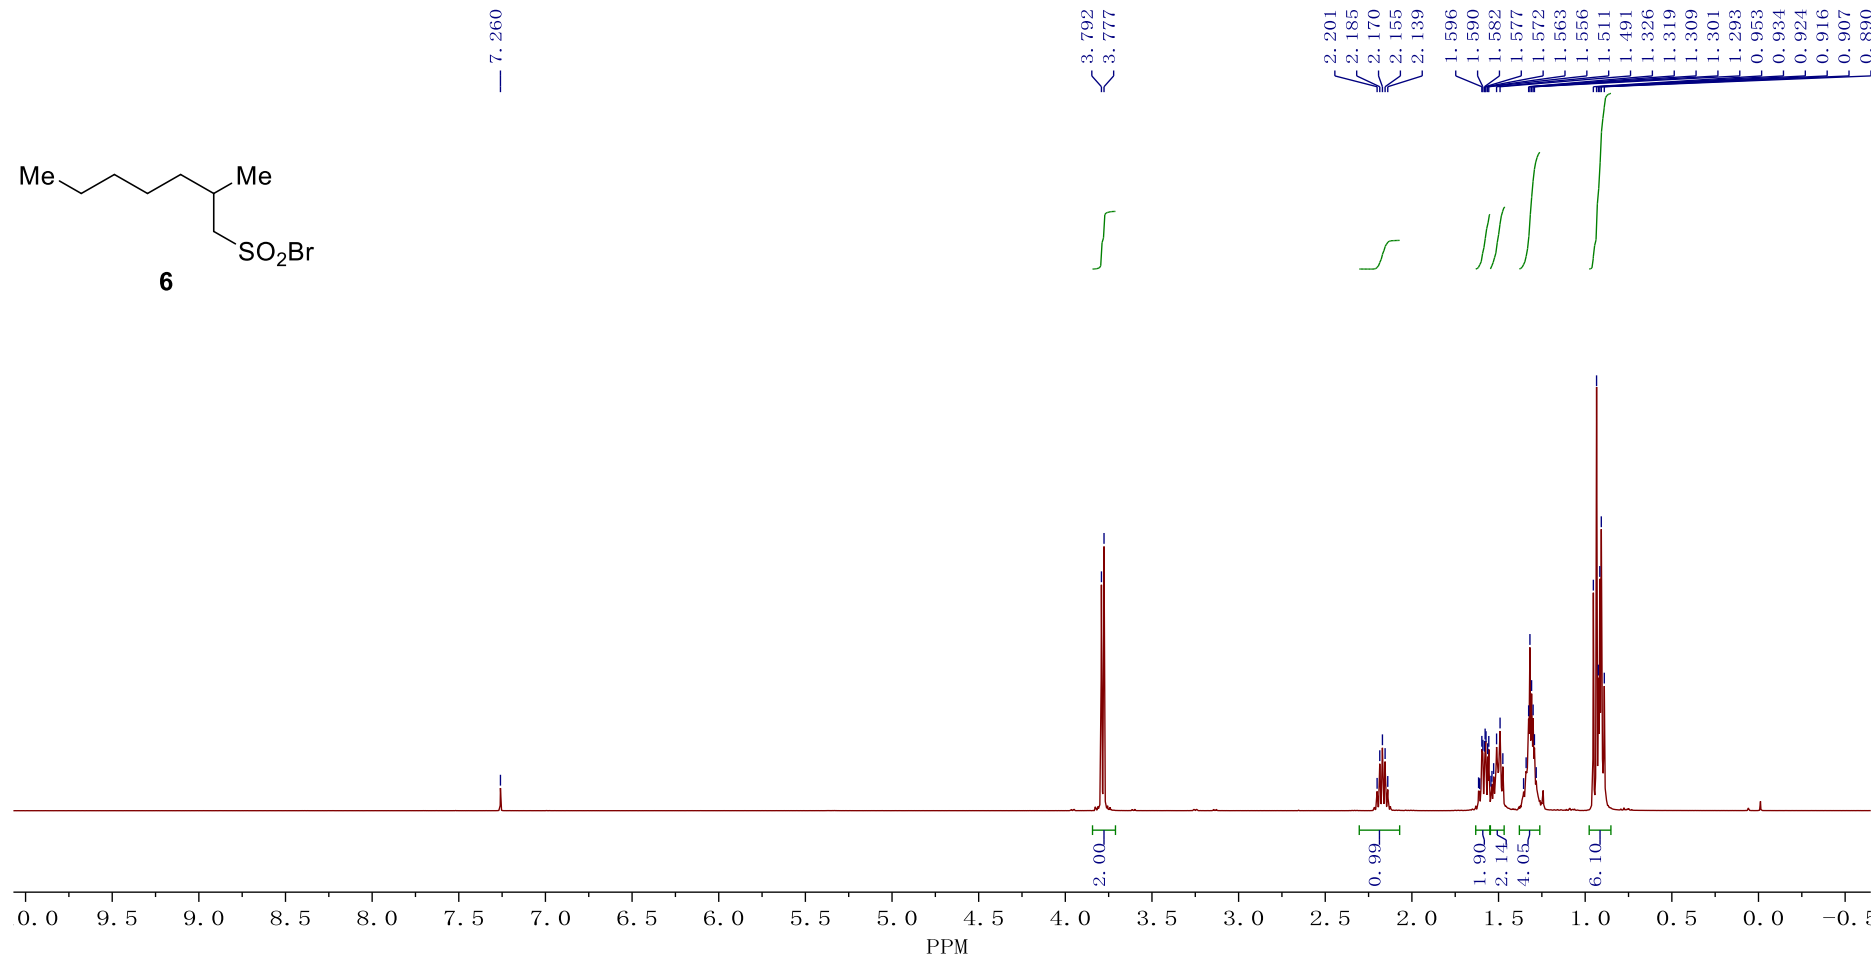

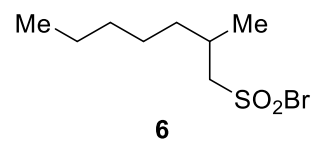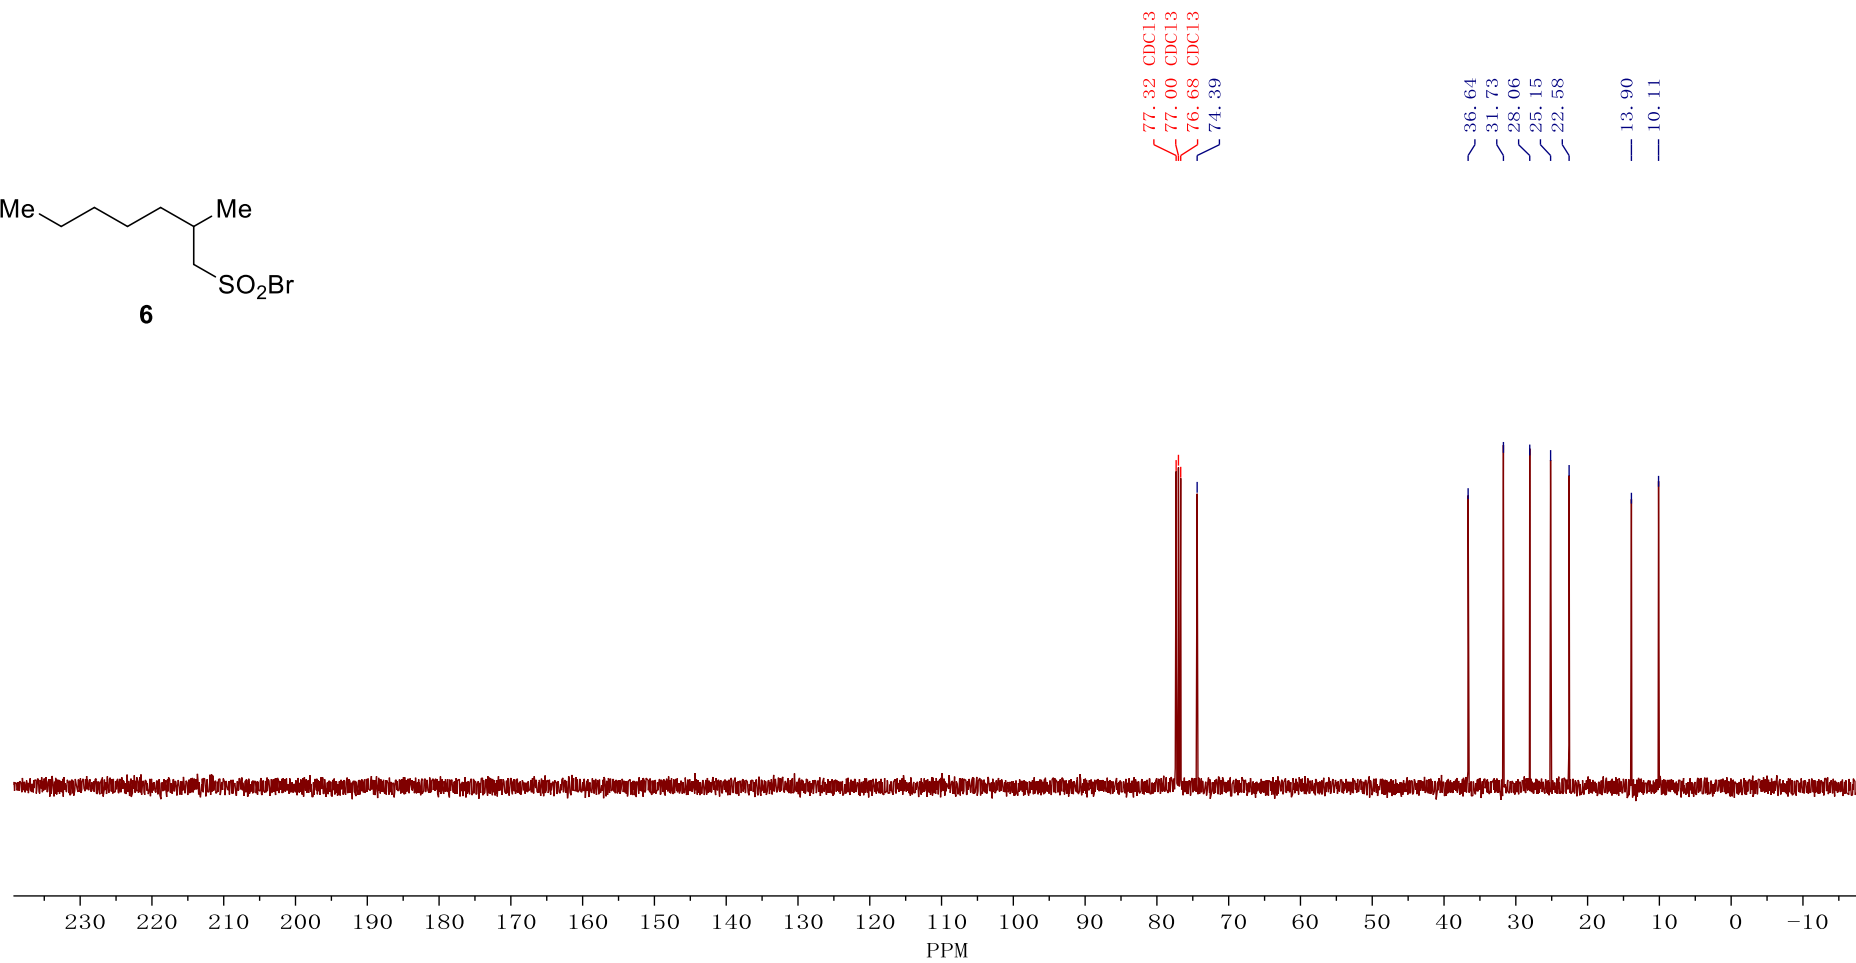

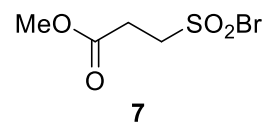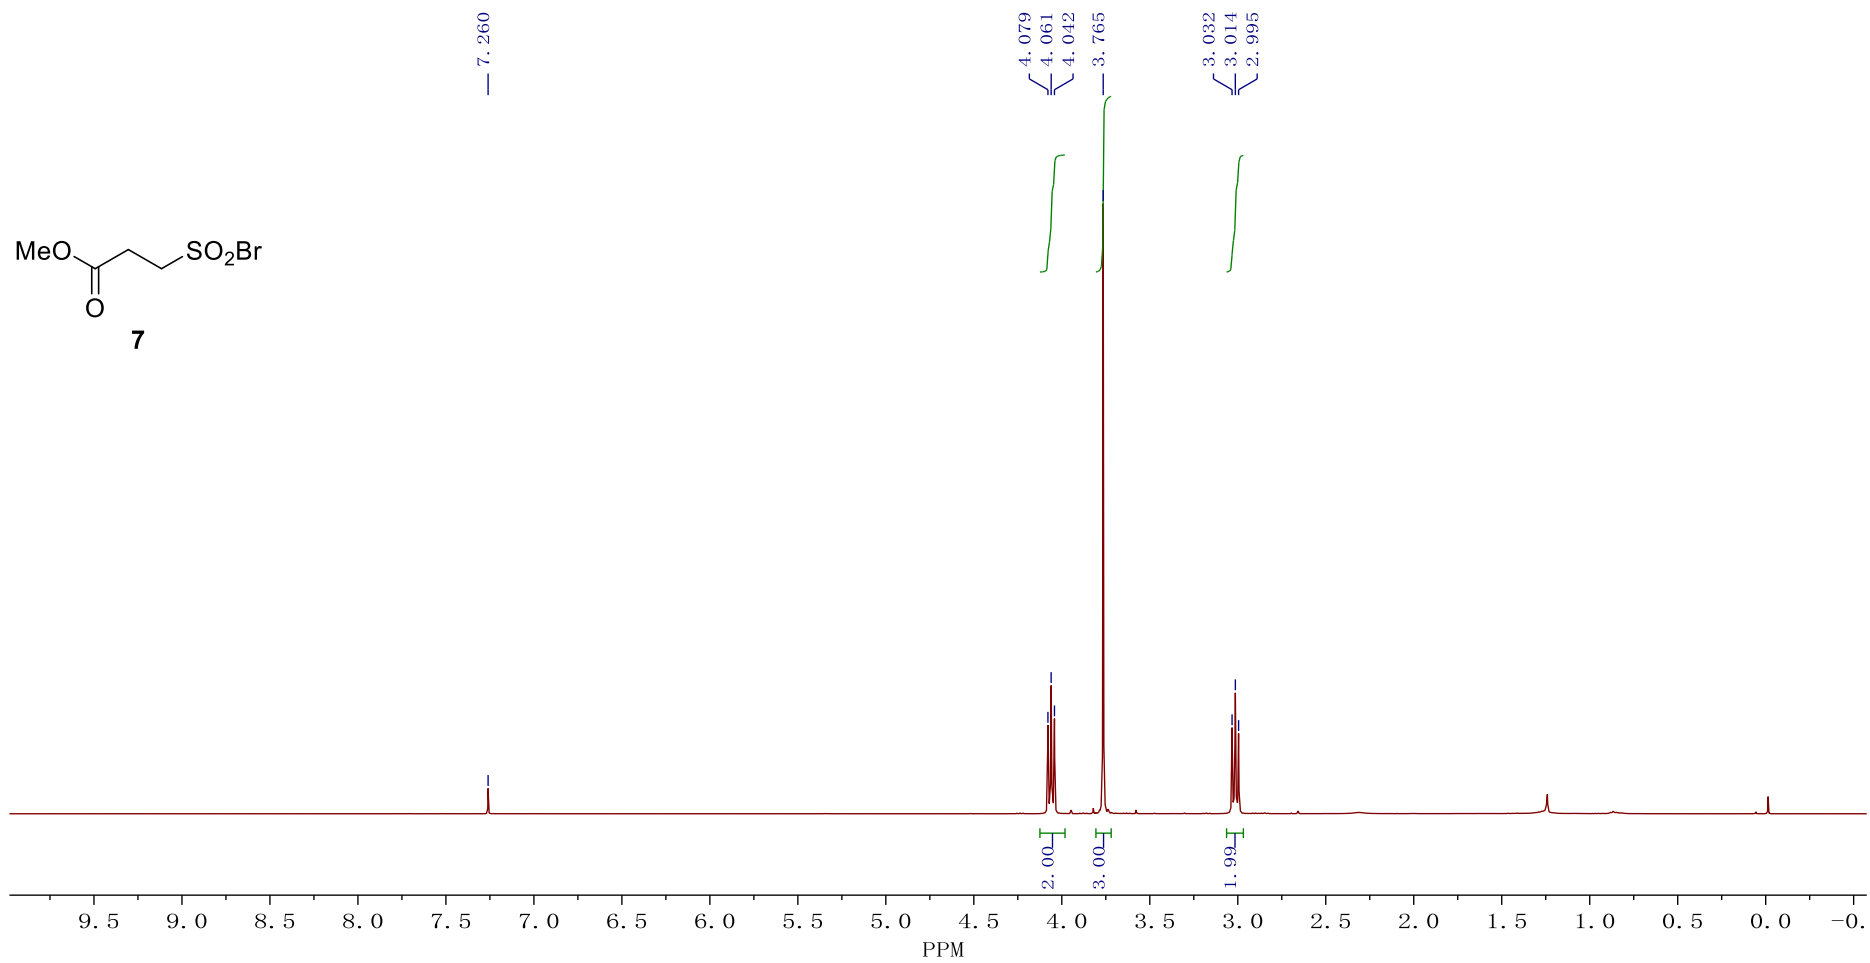

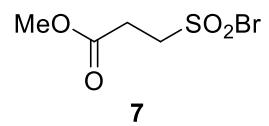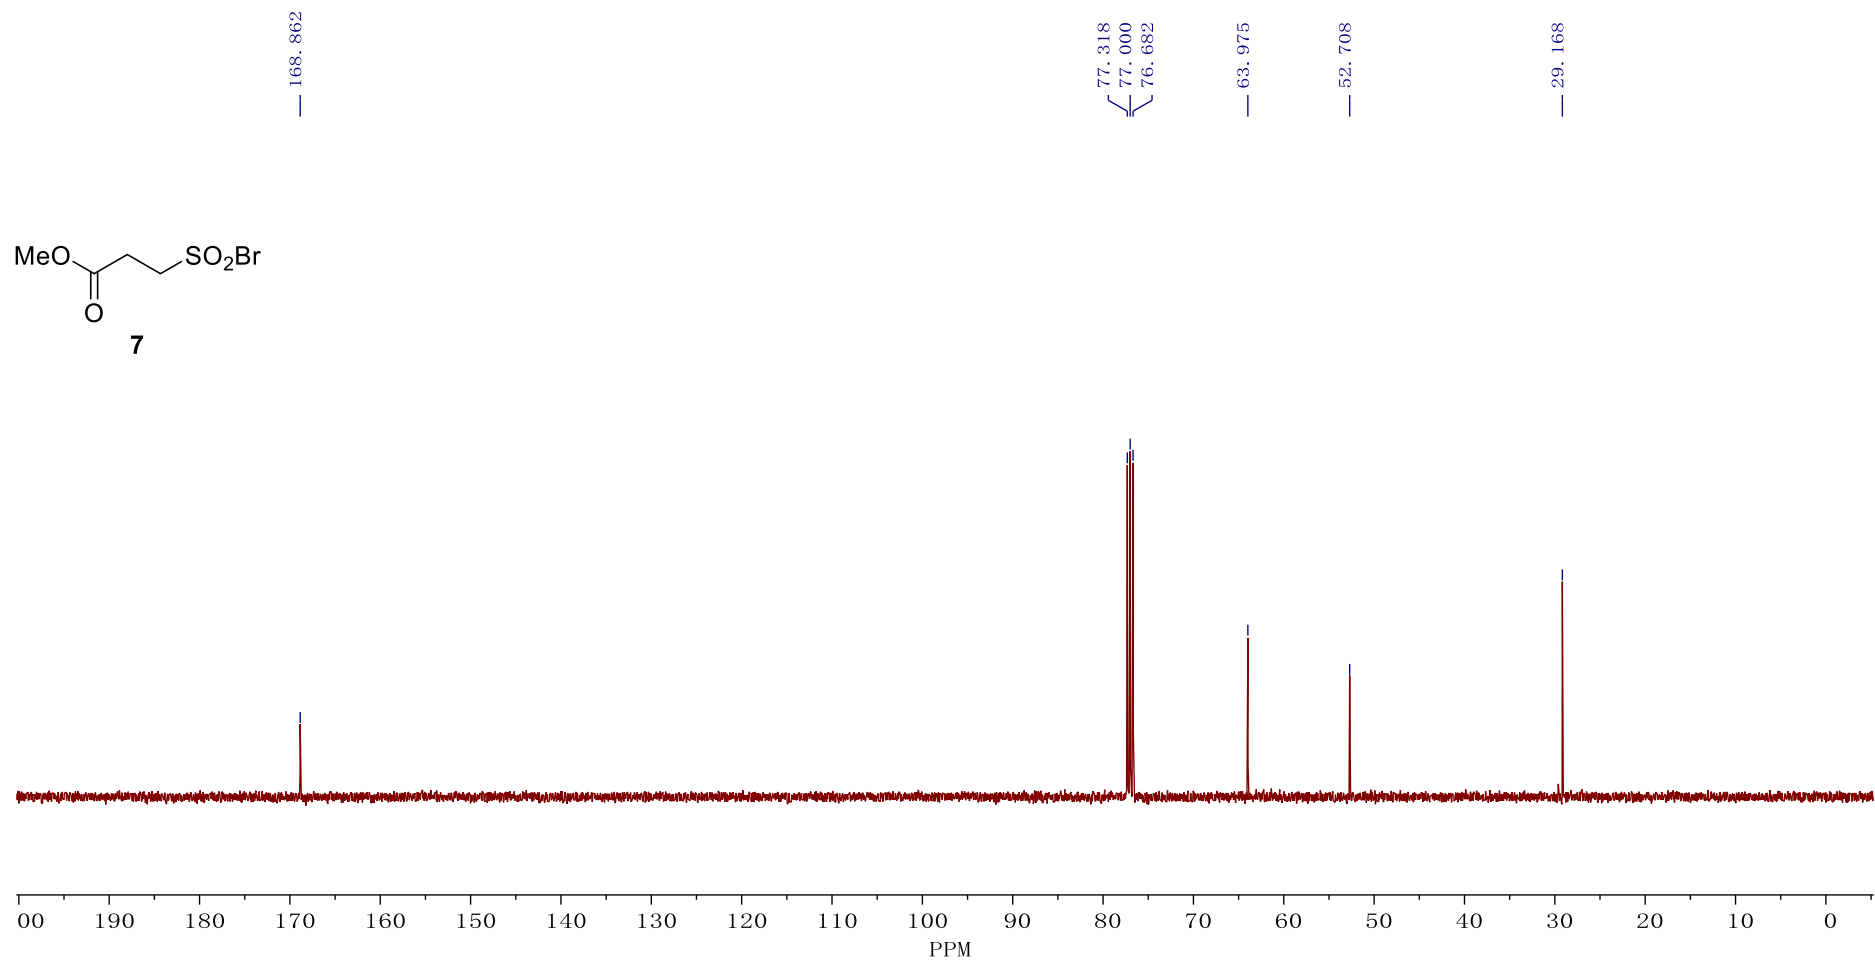

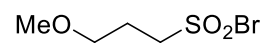

8

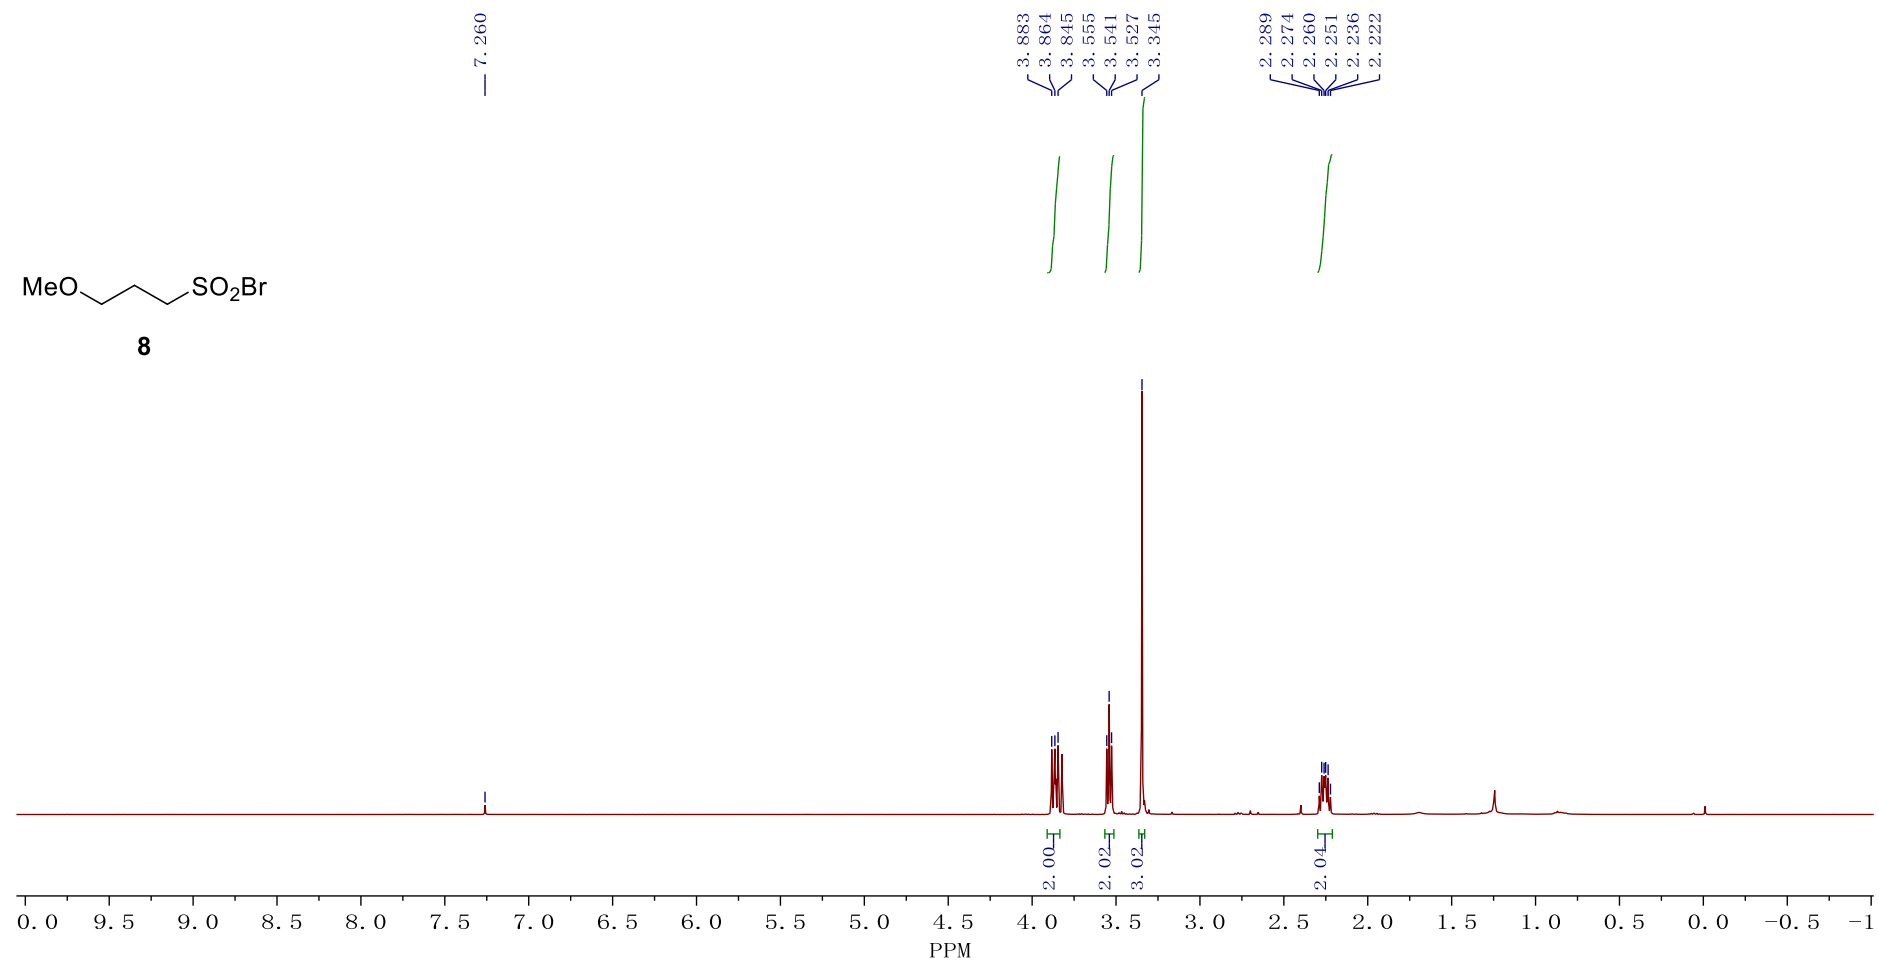

S61

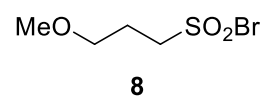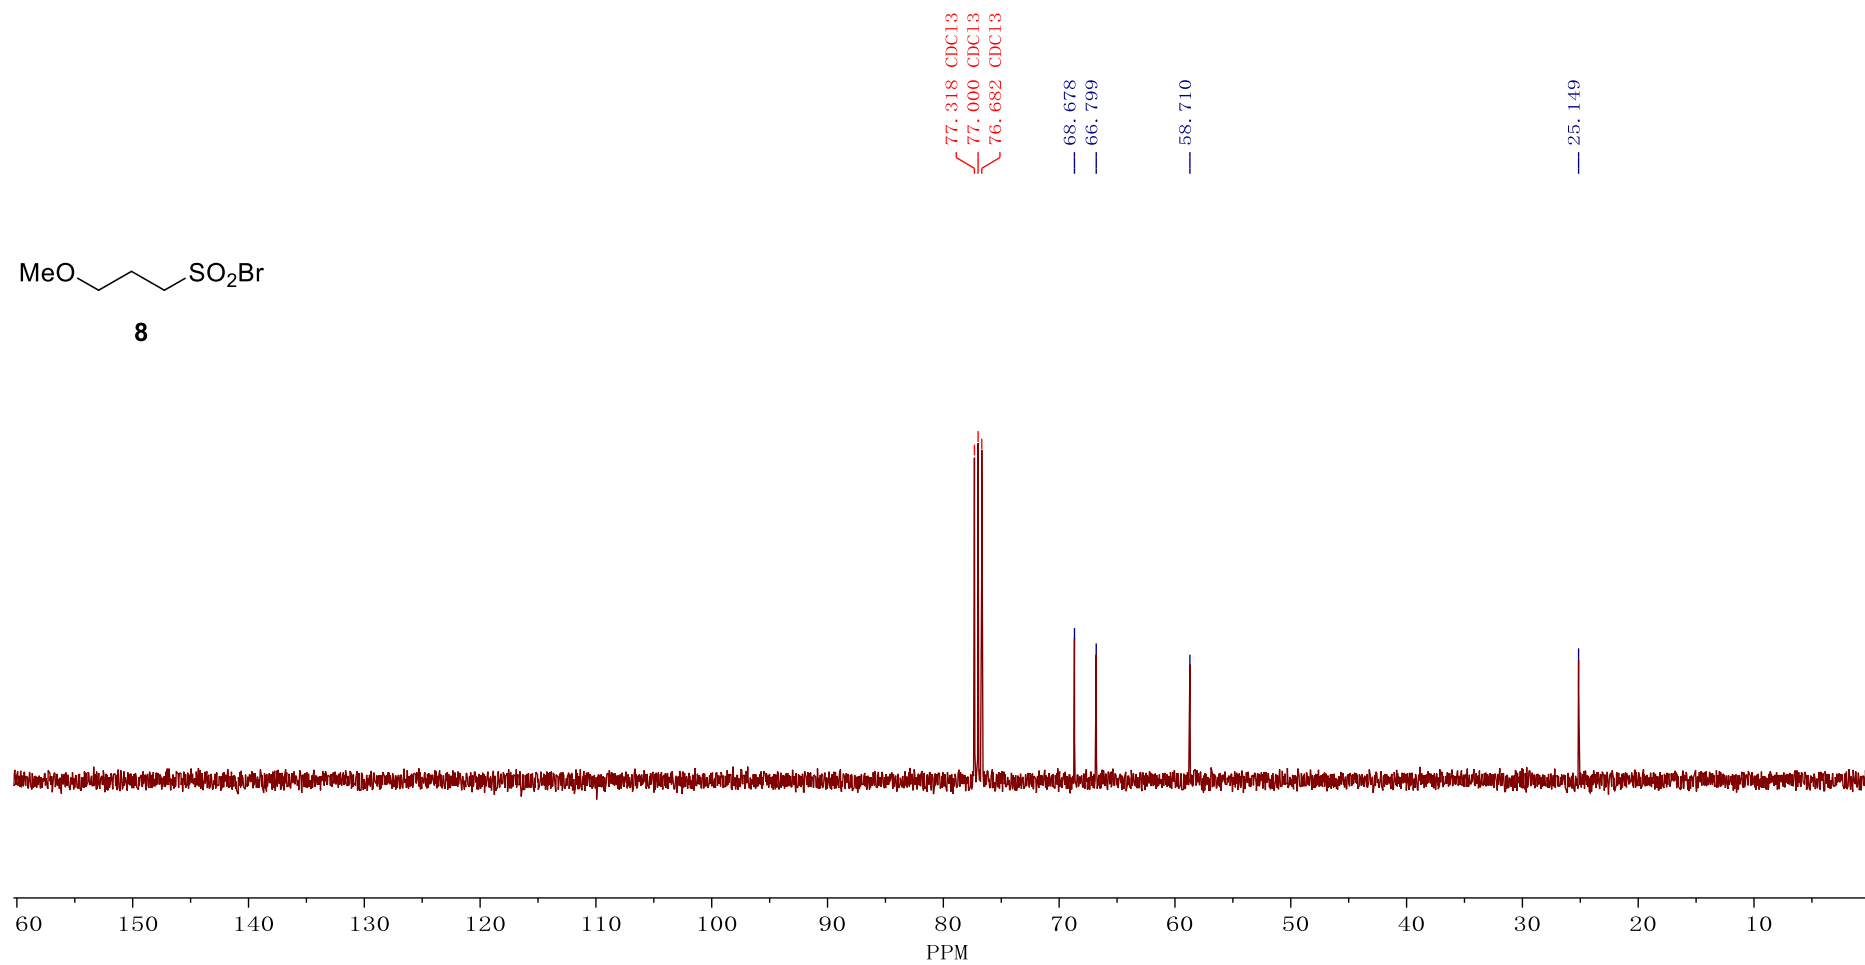

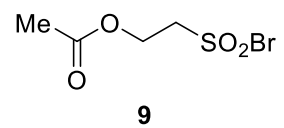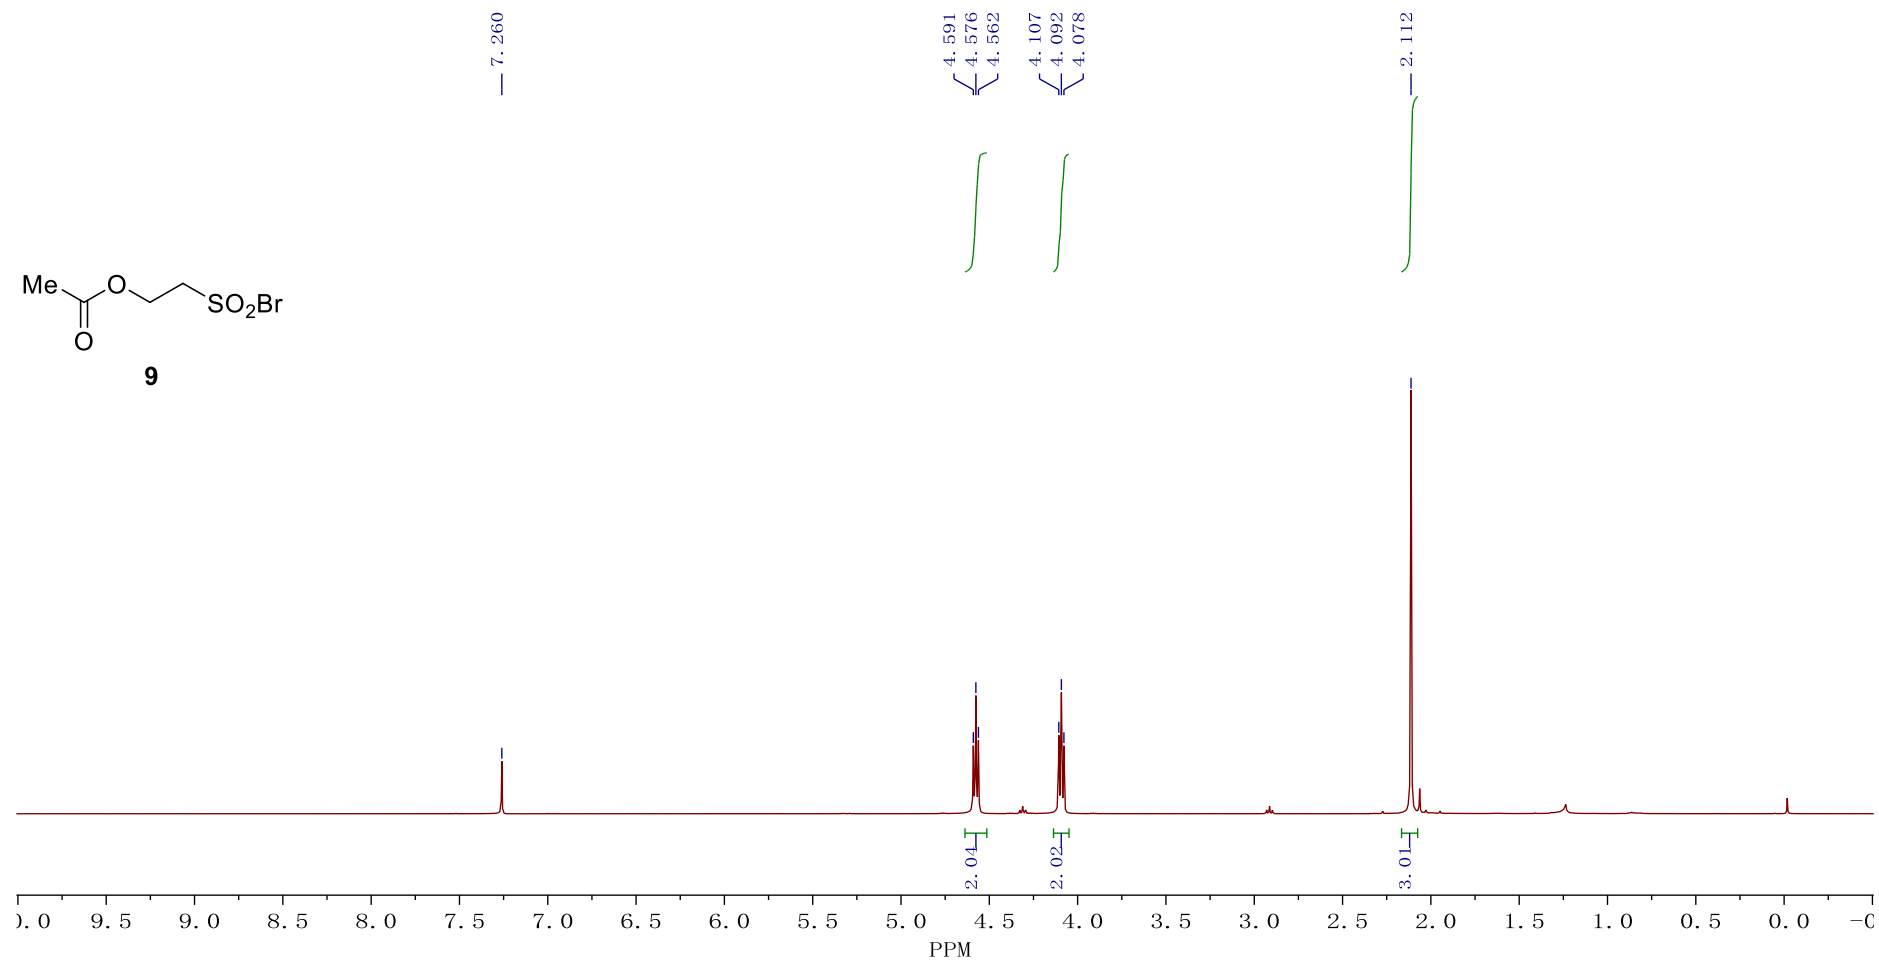

S63

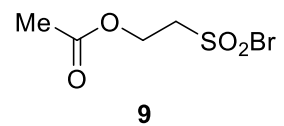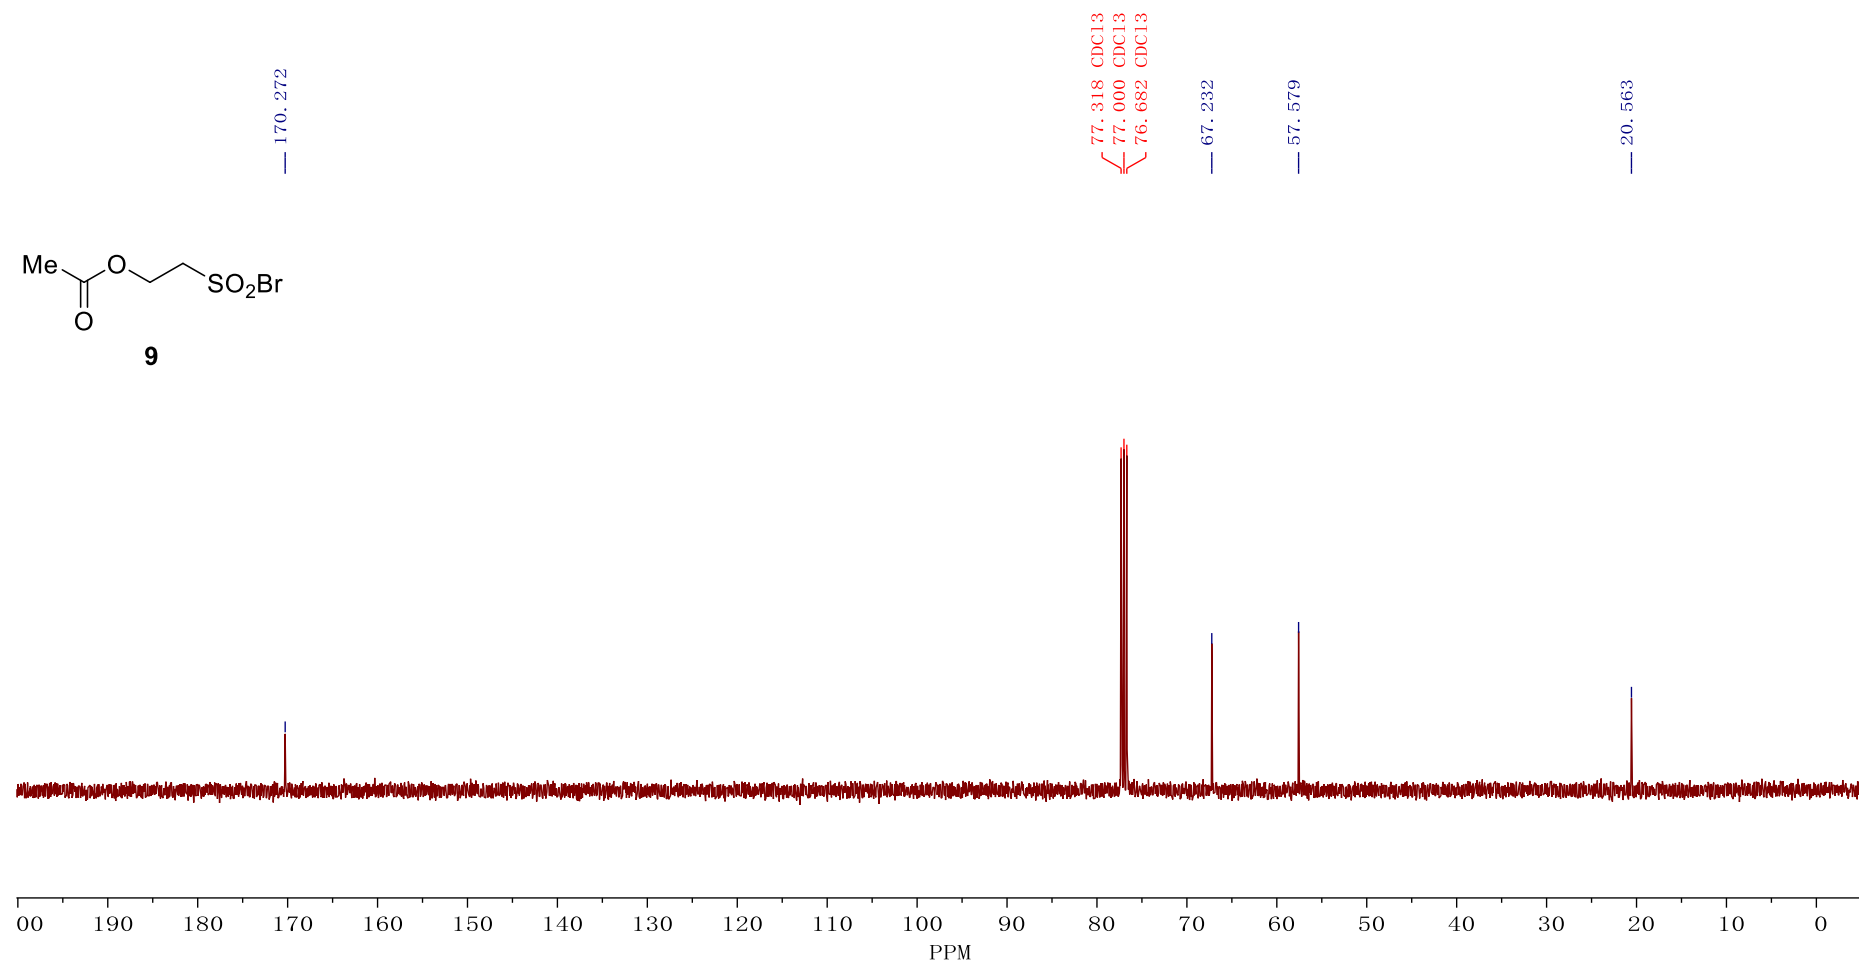



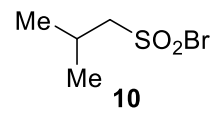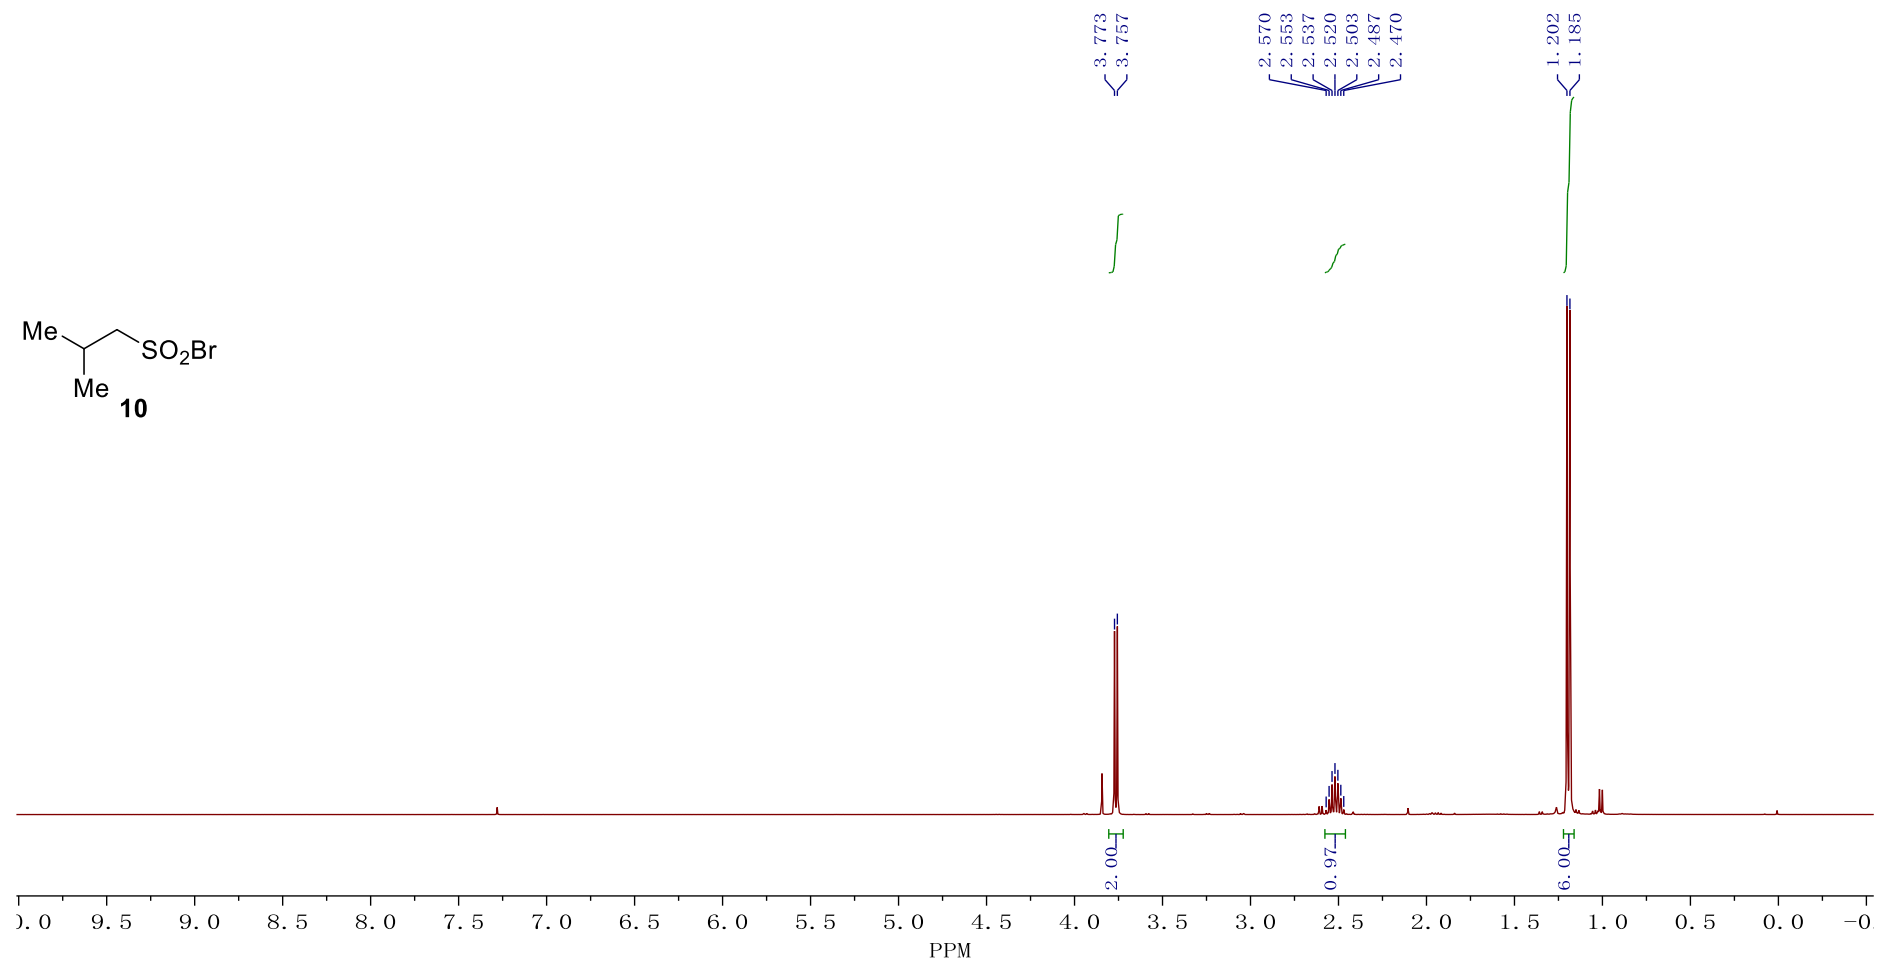

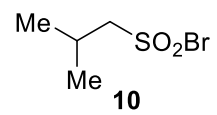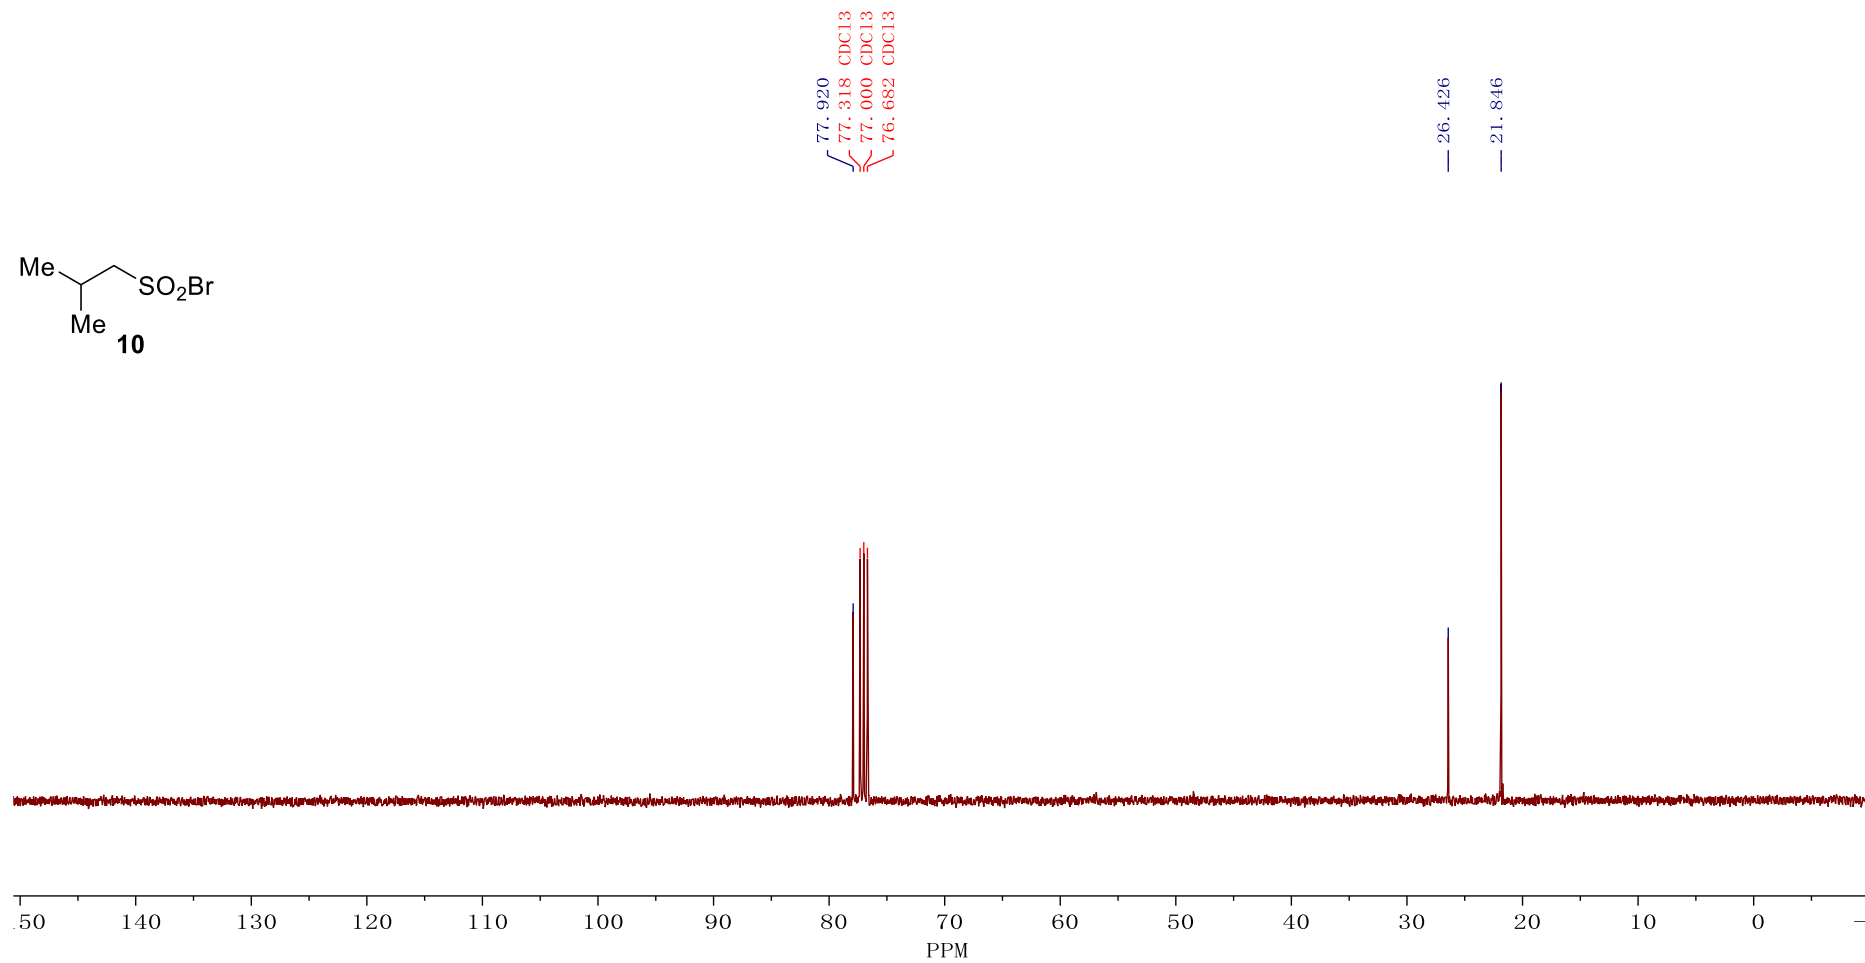

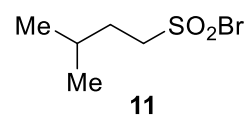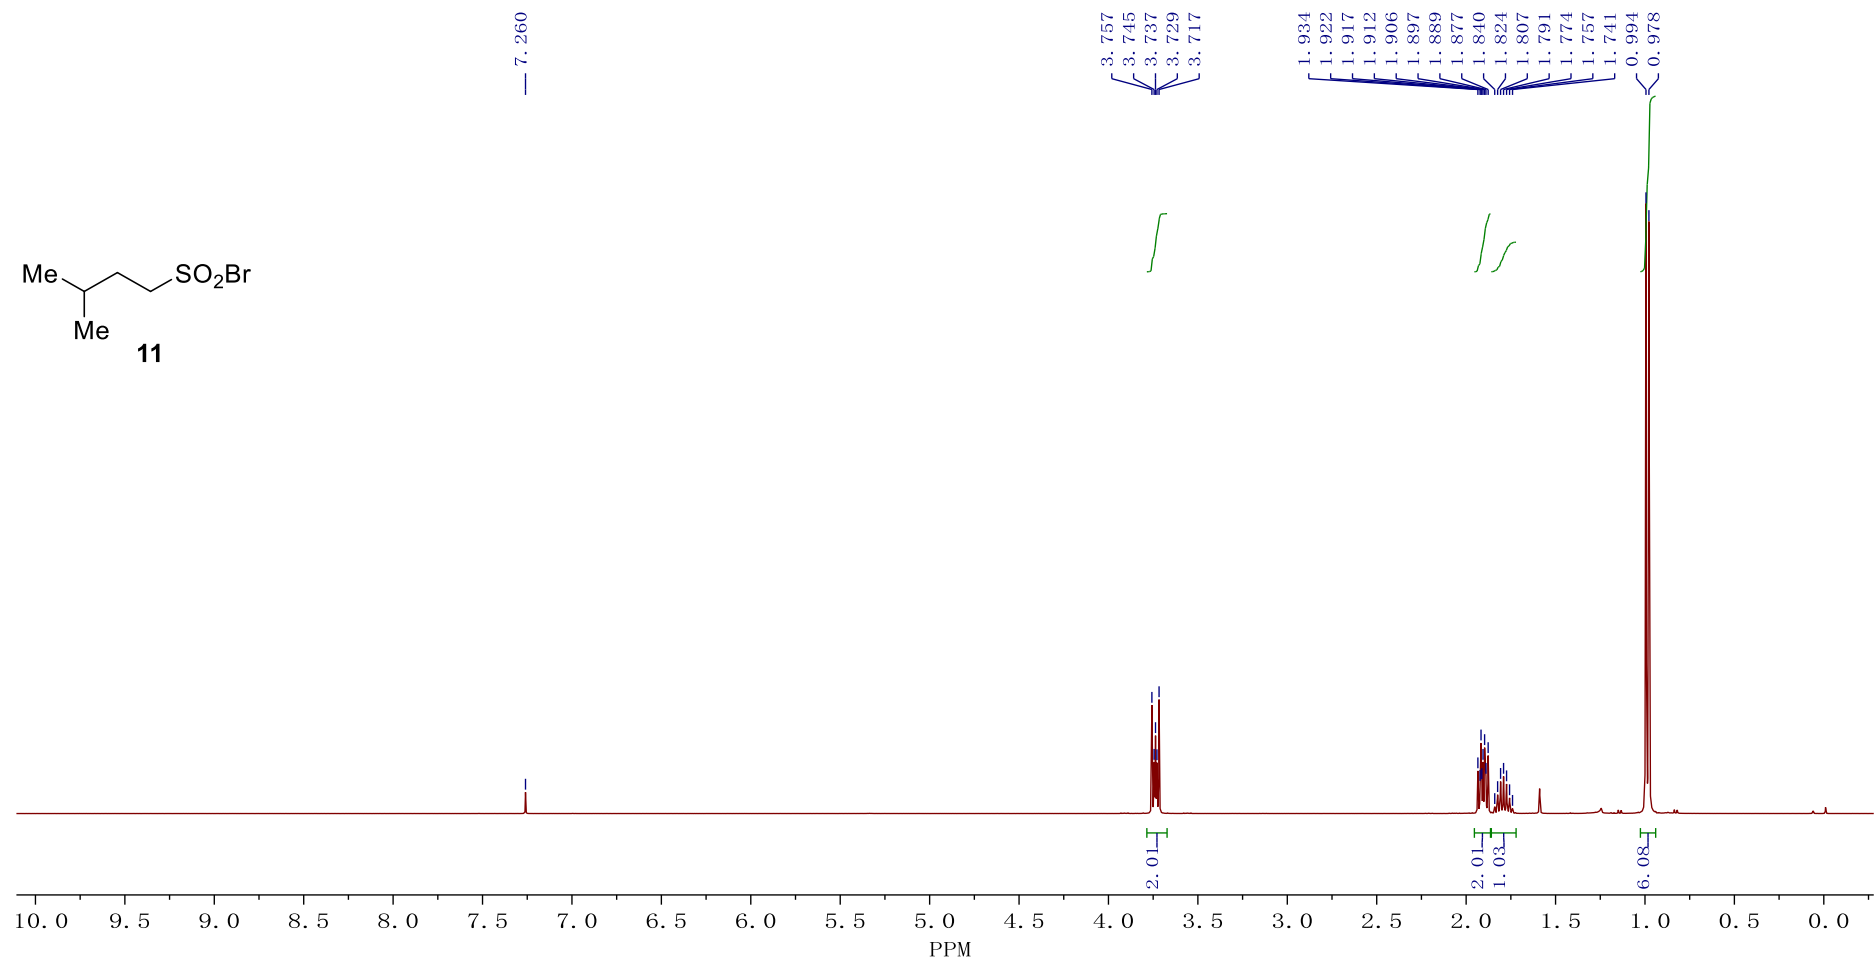

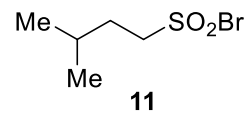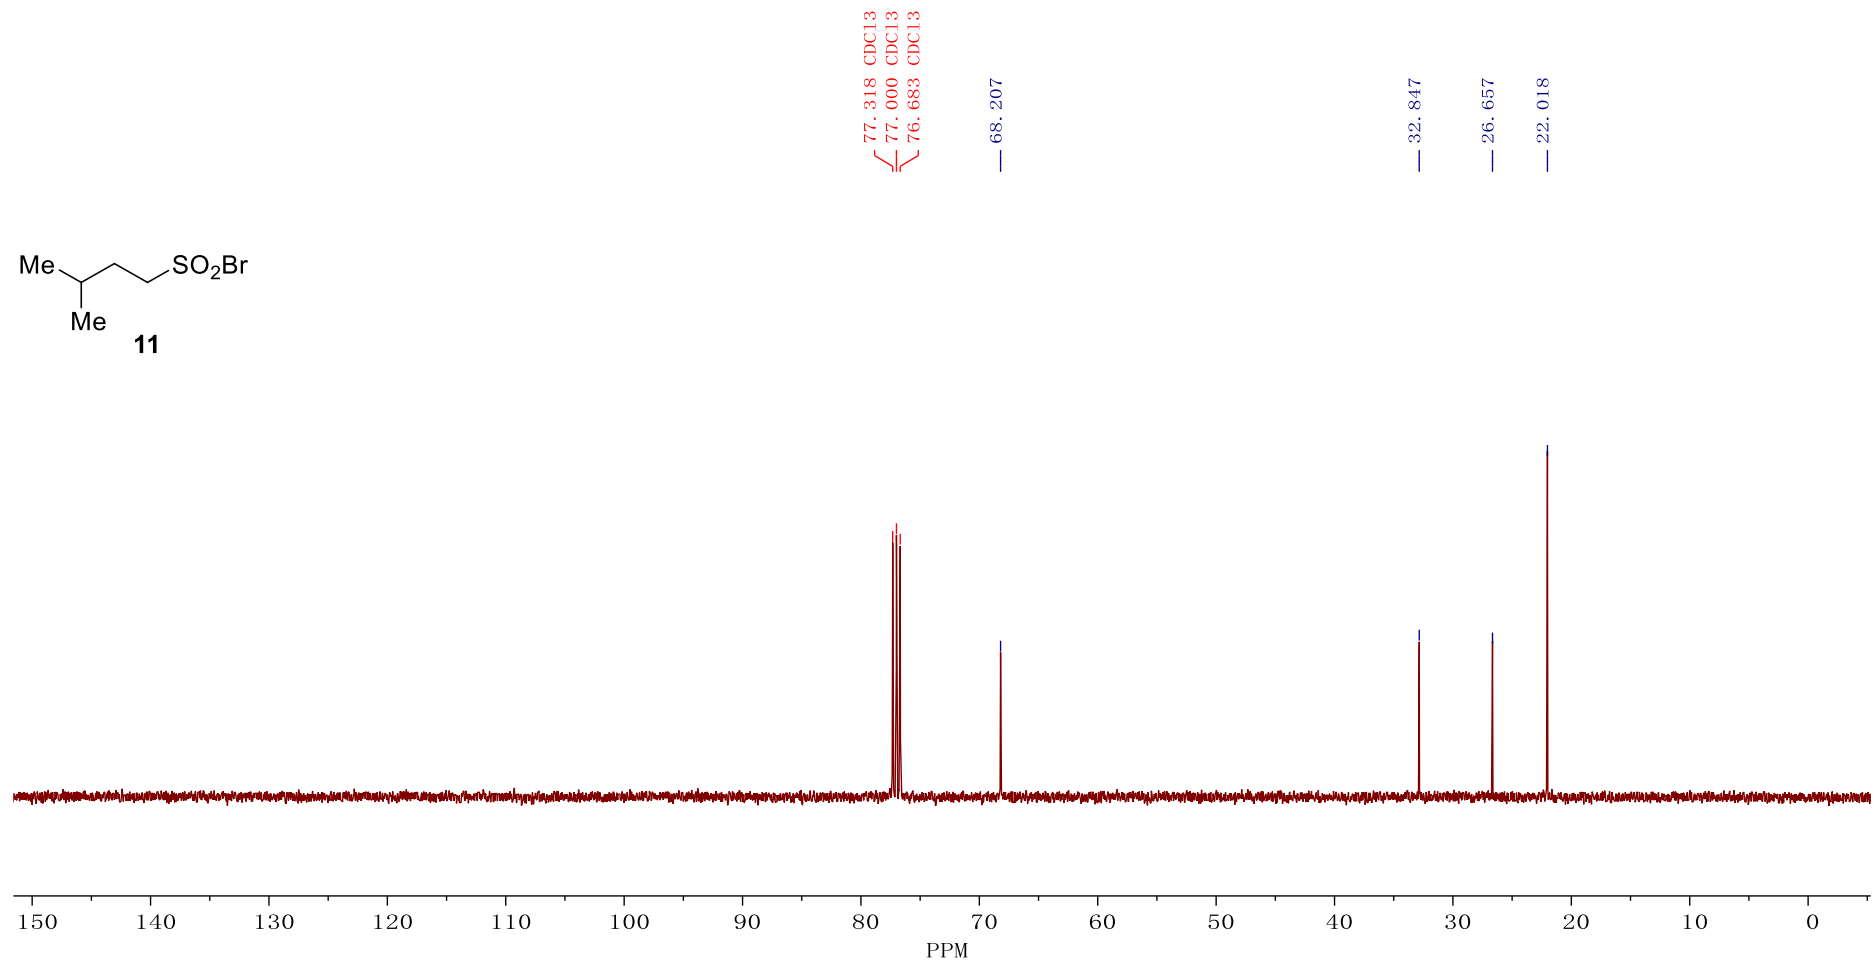

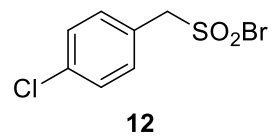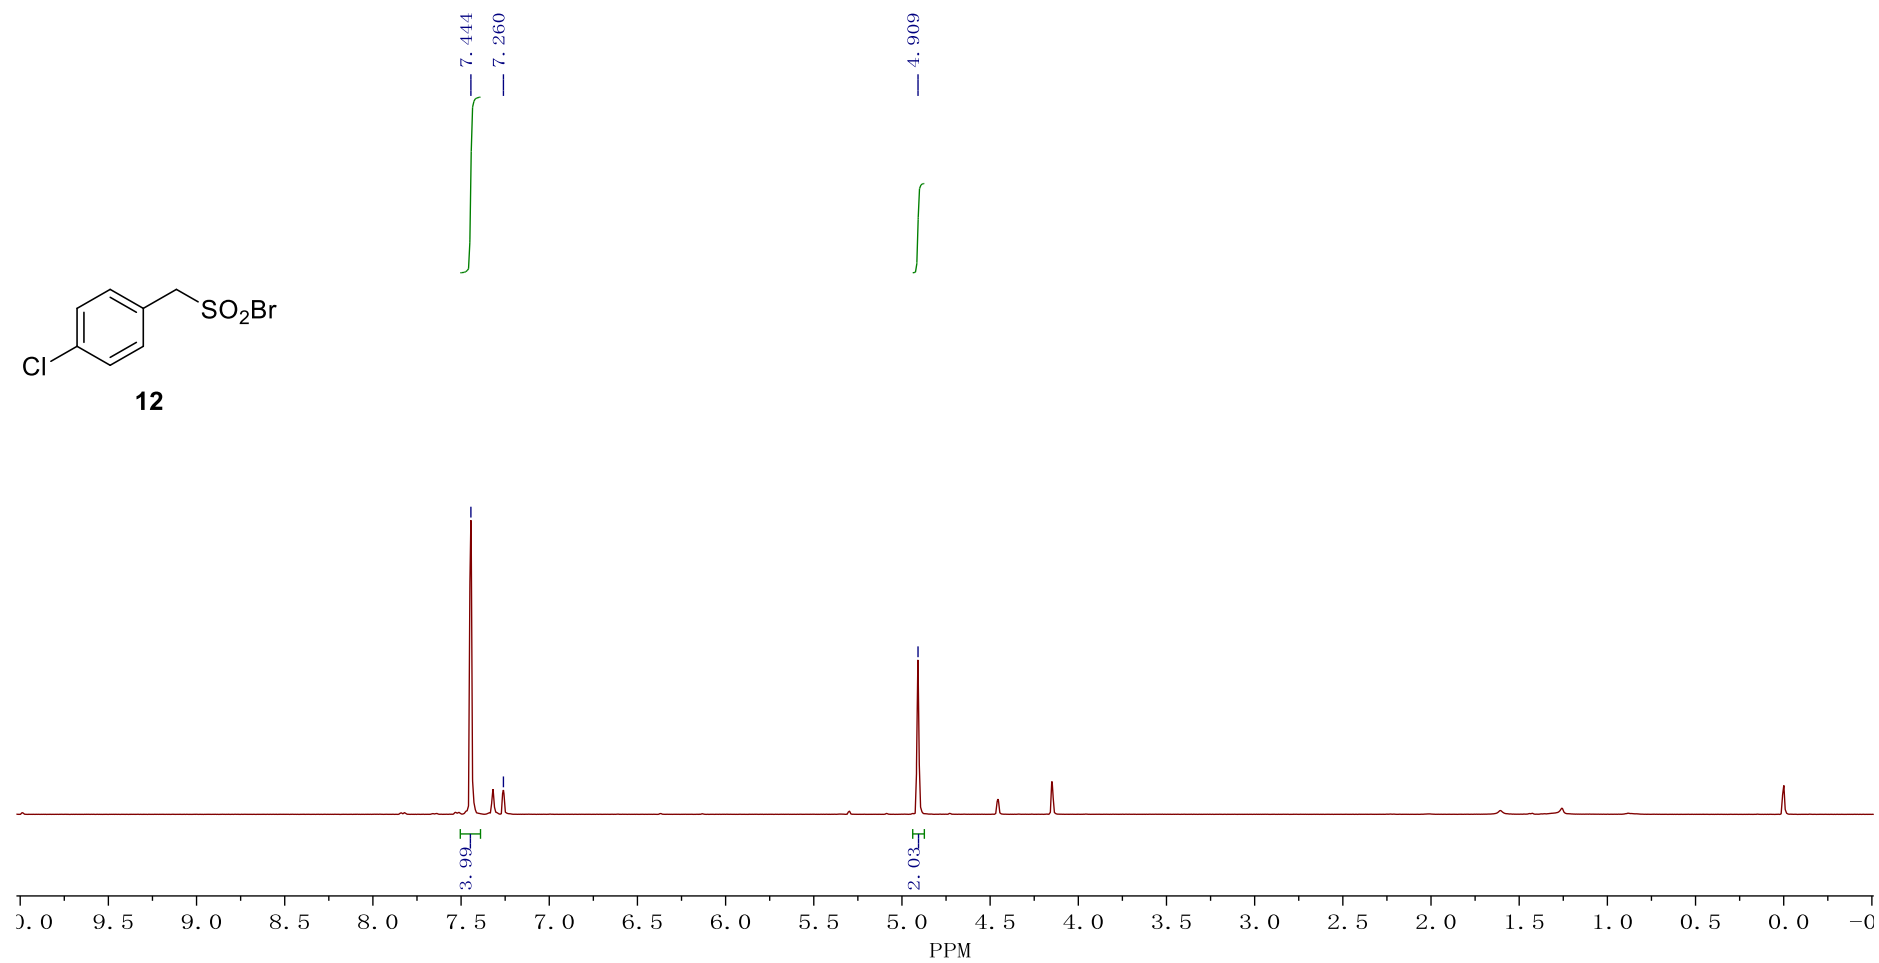

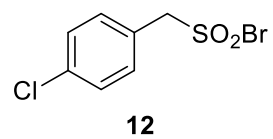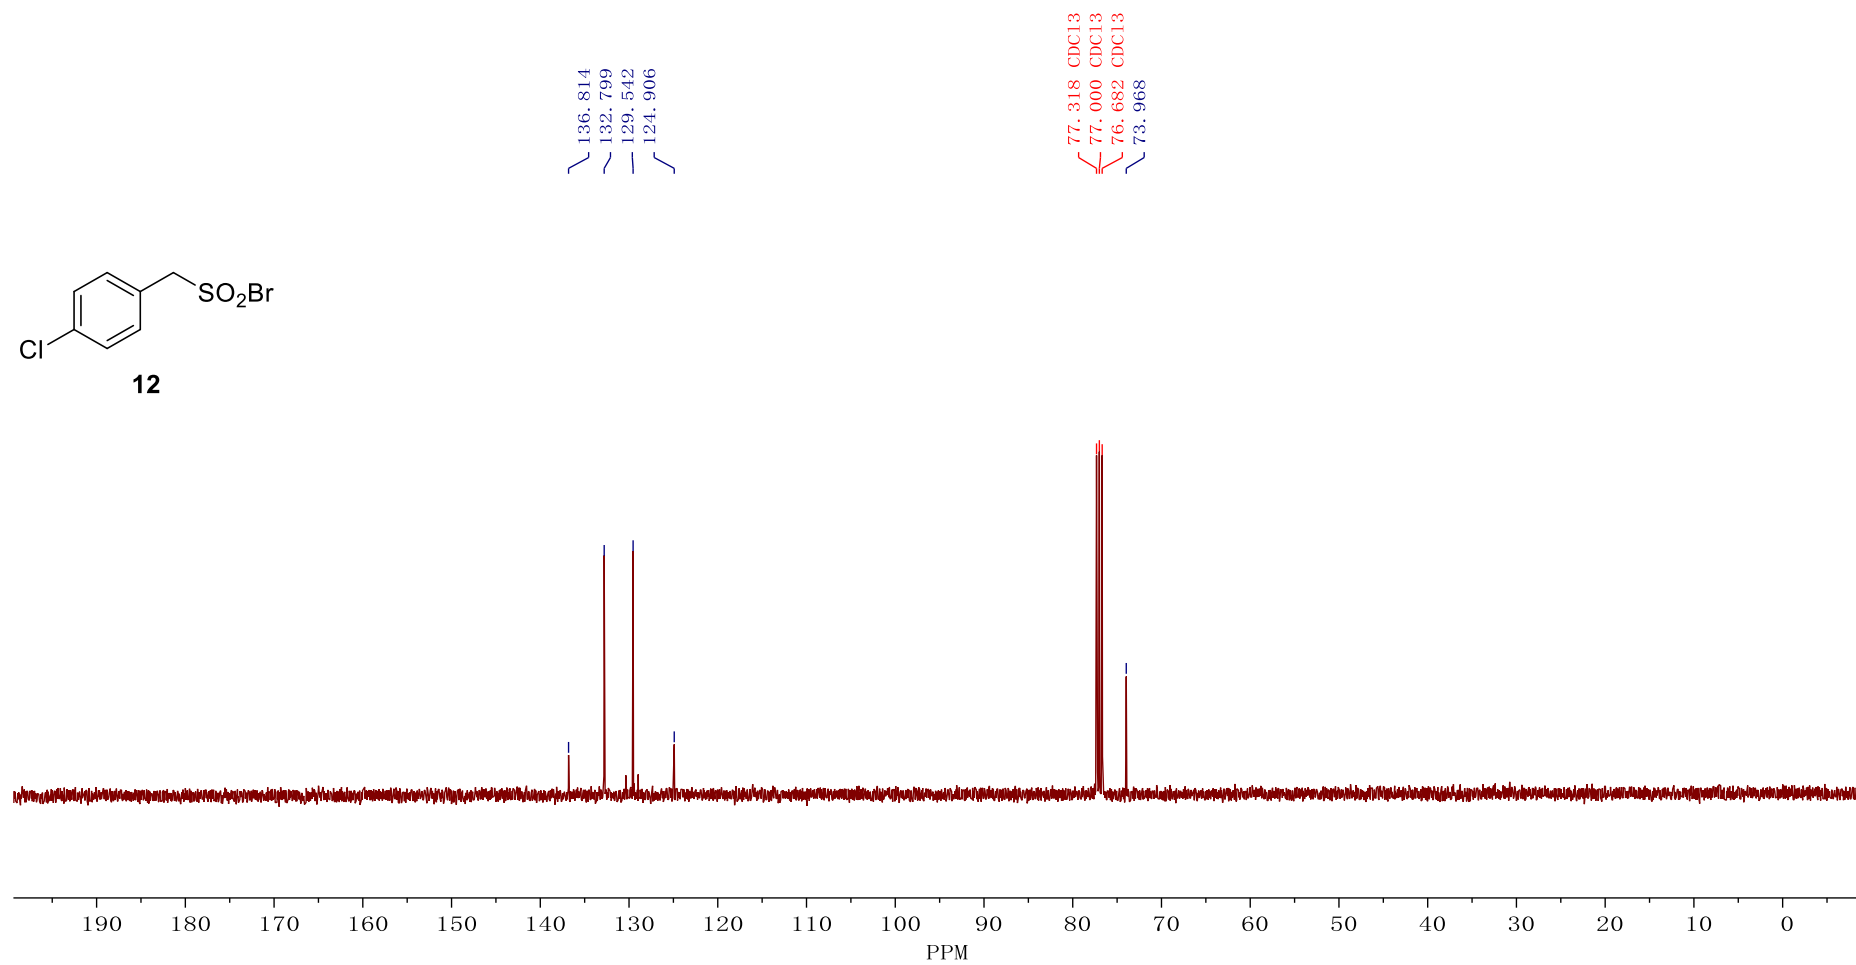

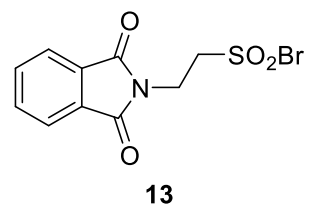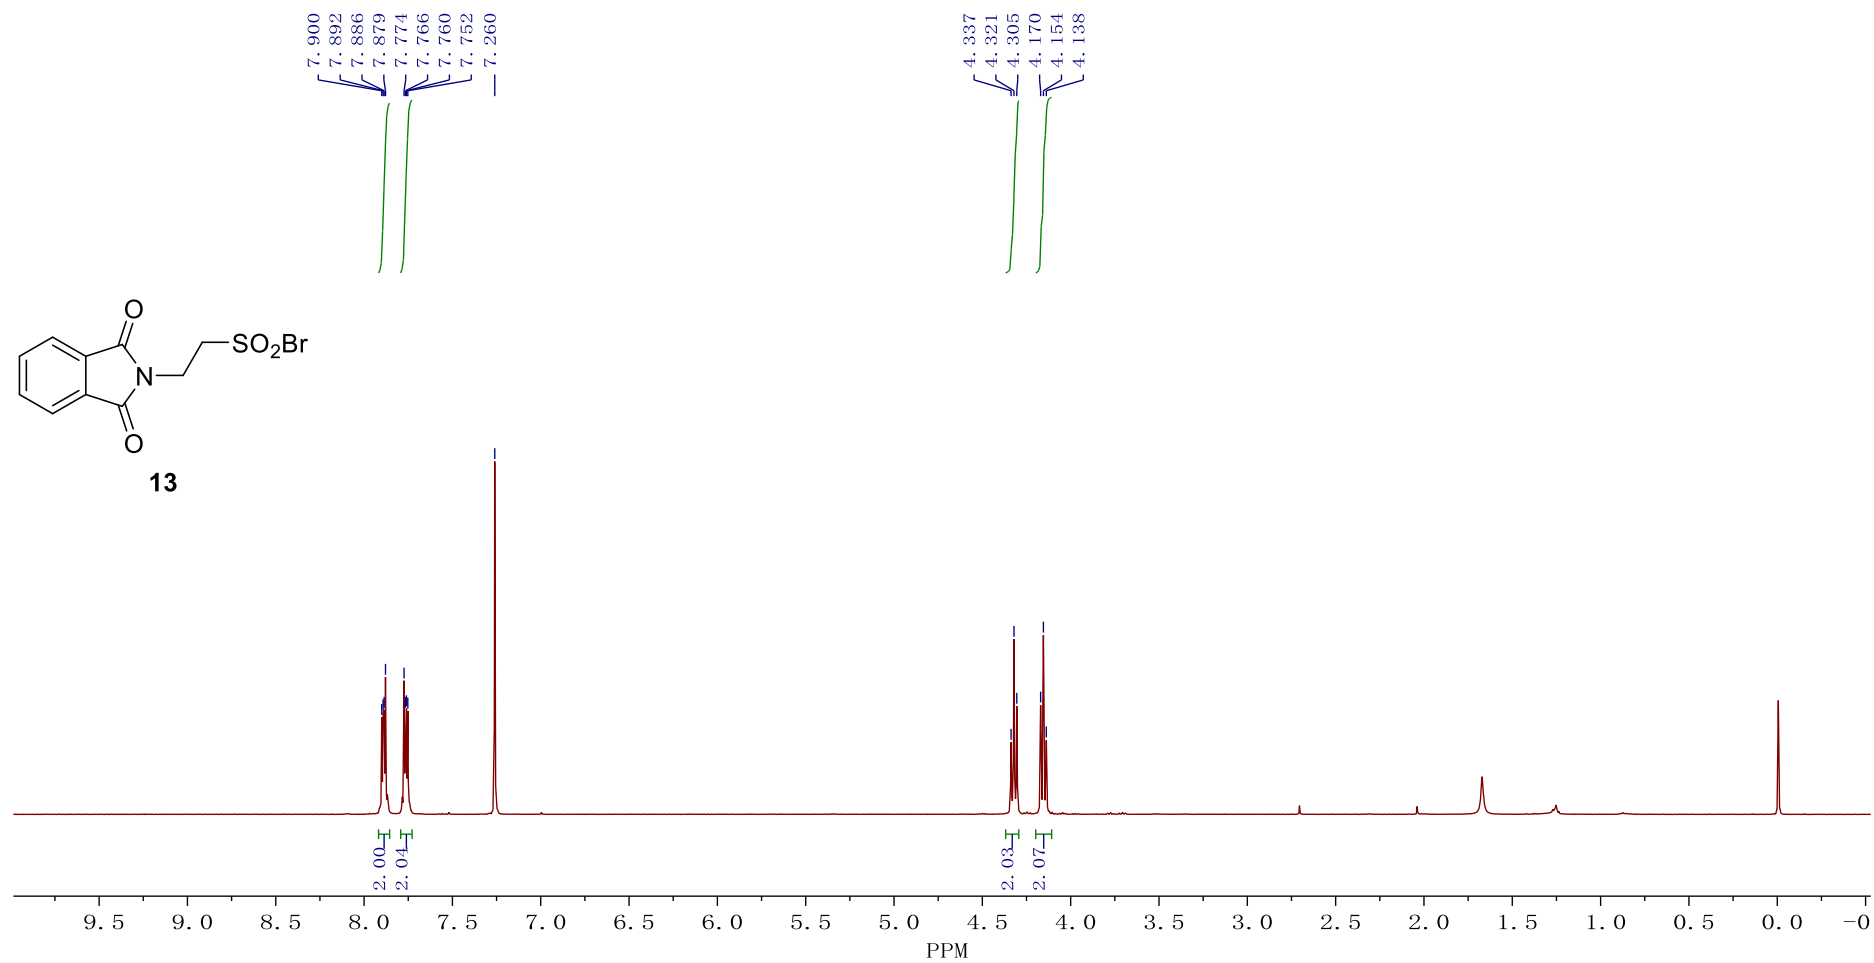

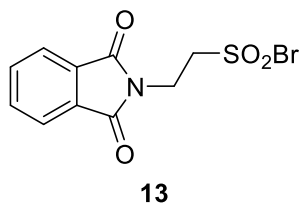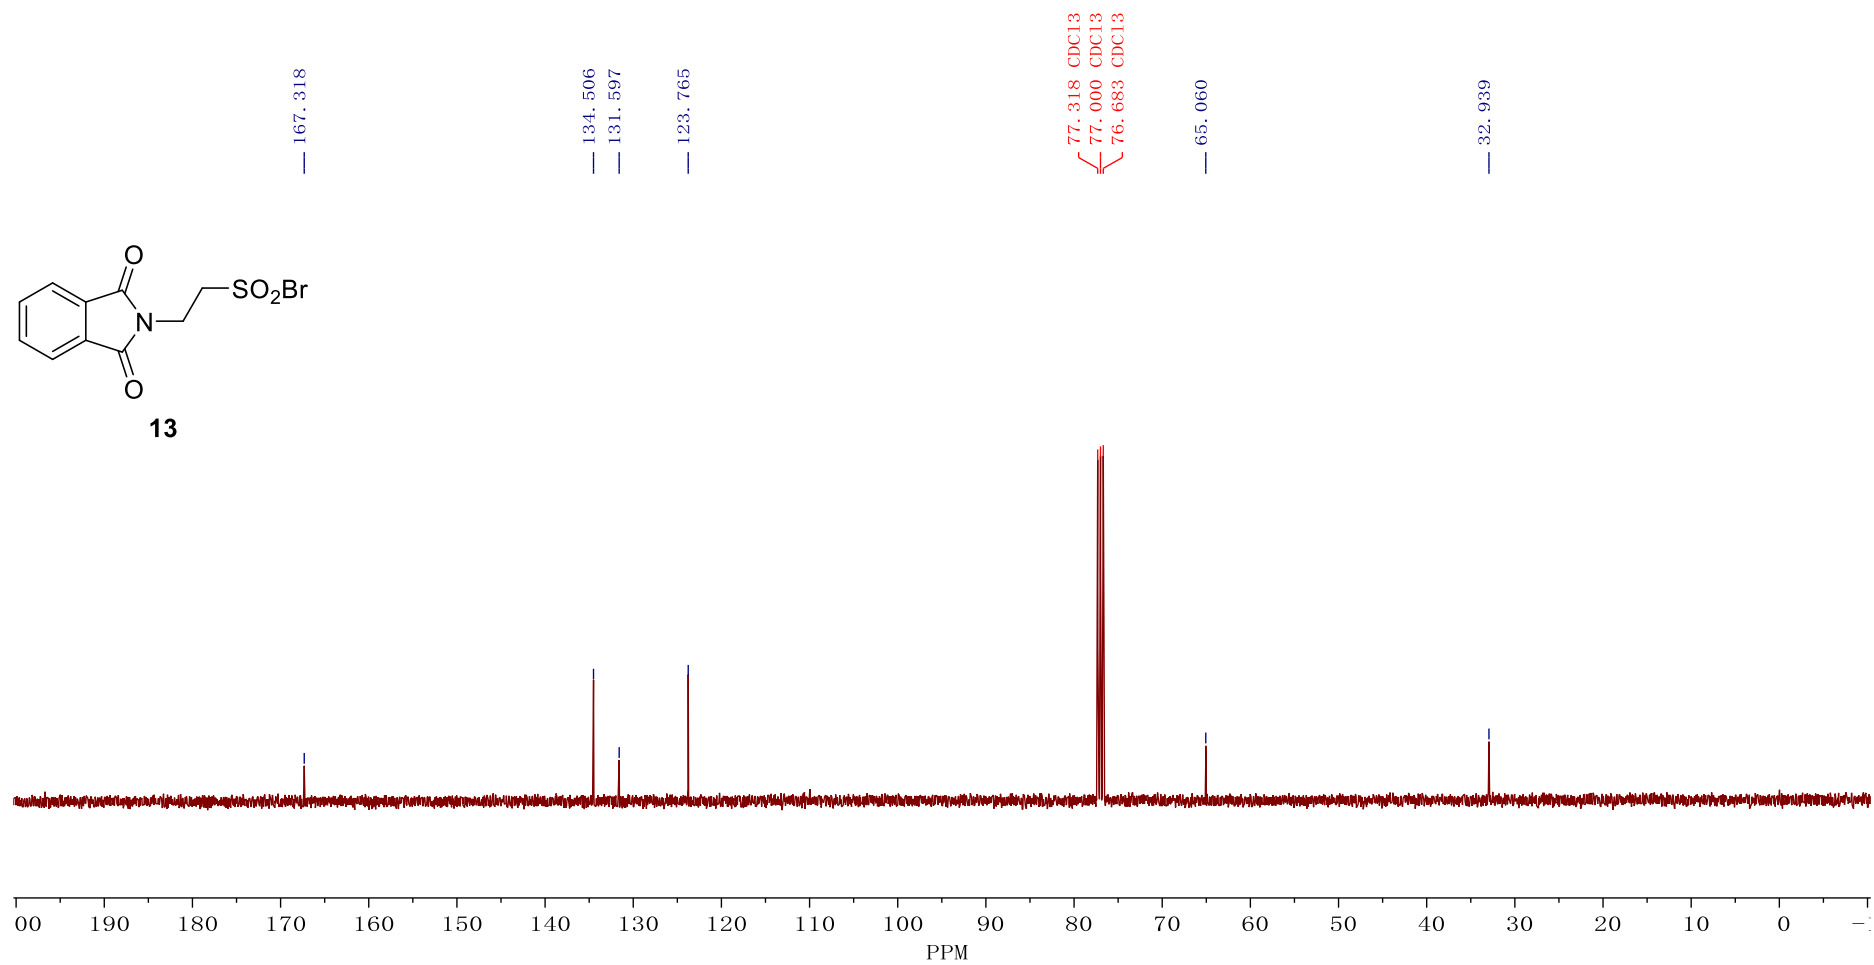



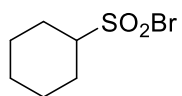

14

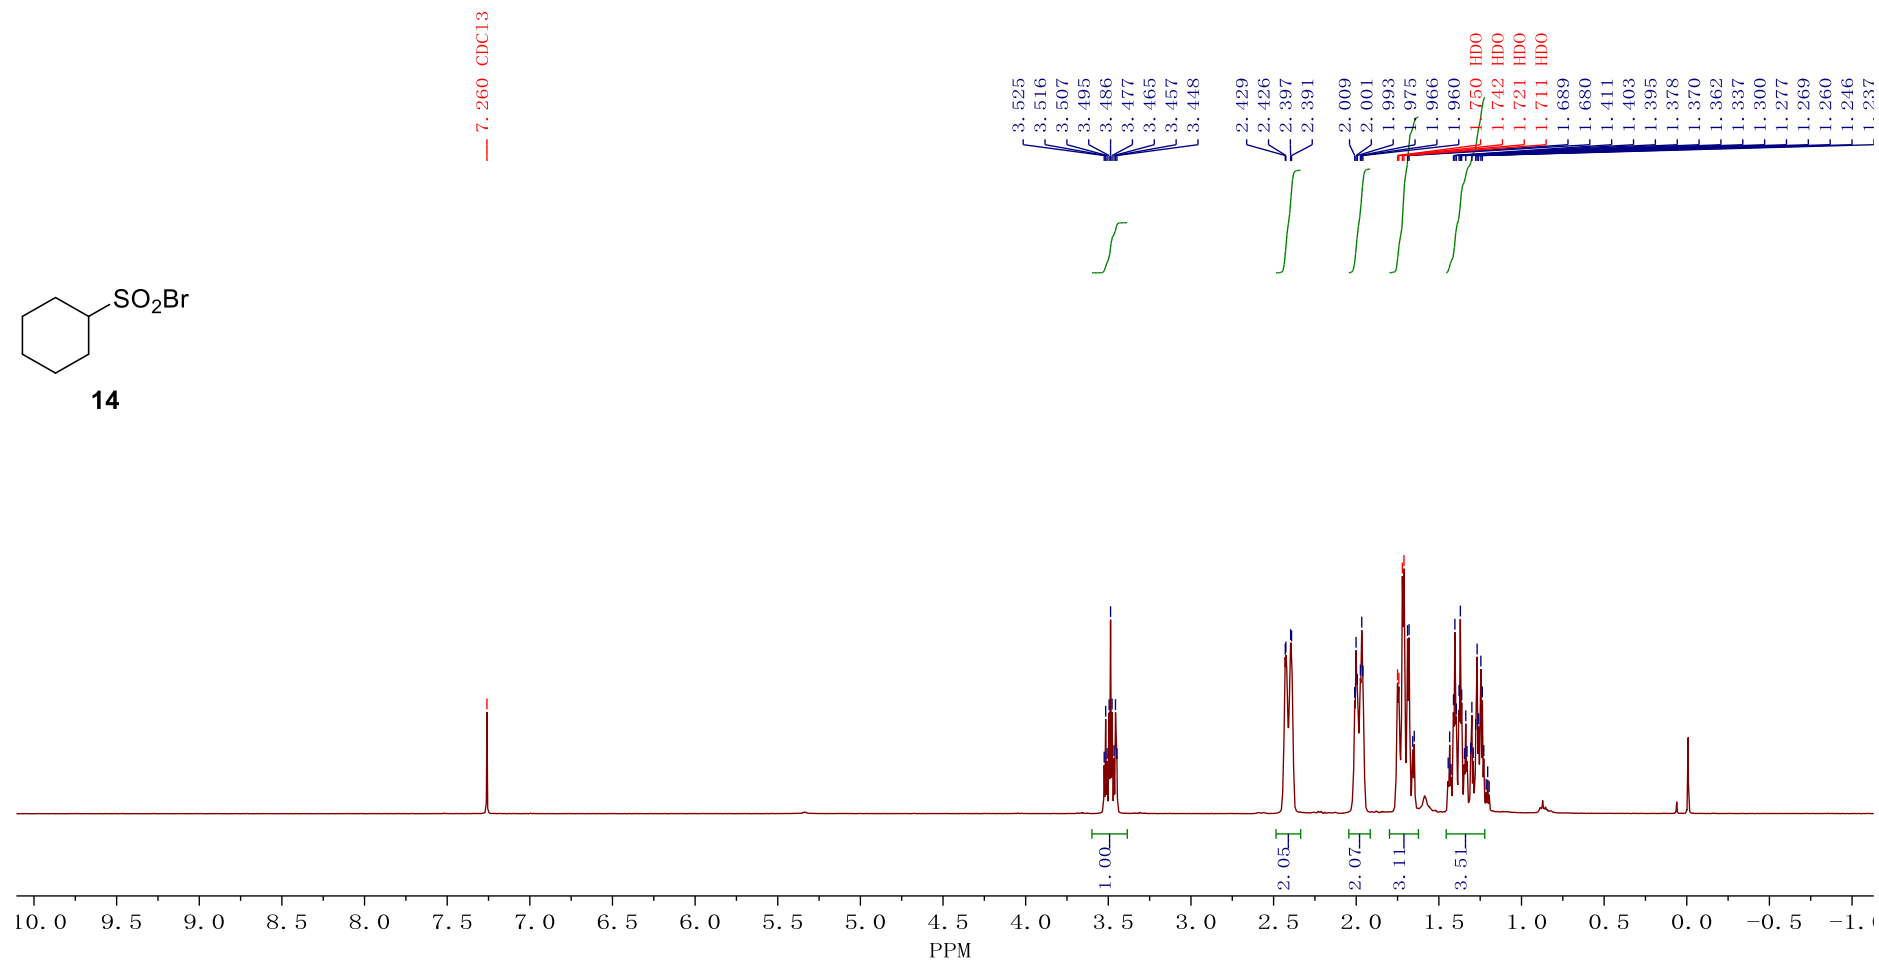

S73

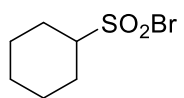

14

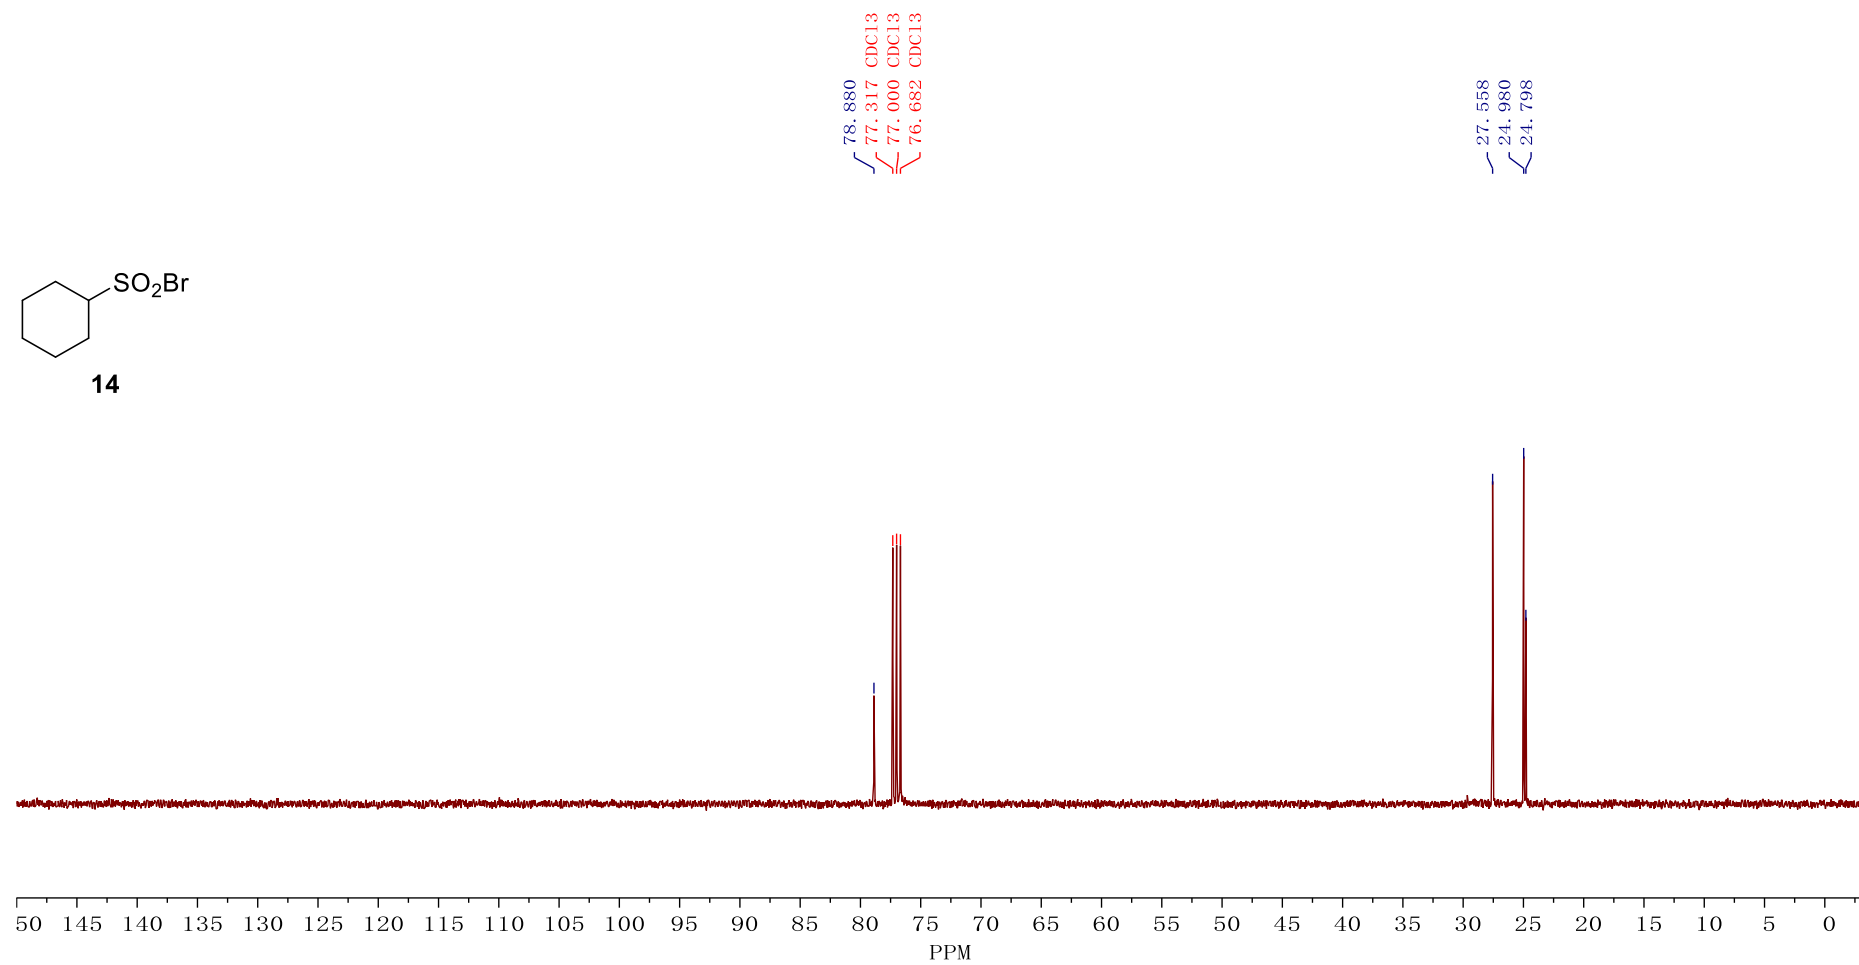

S74

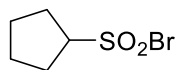

15

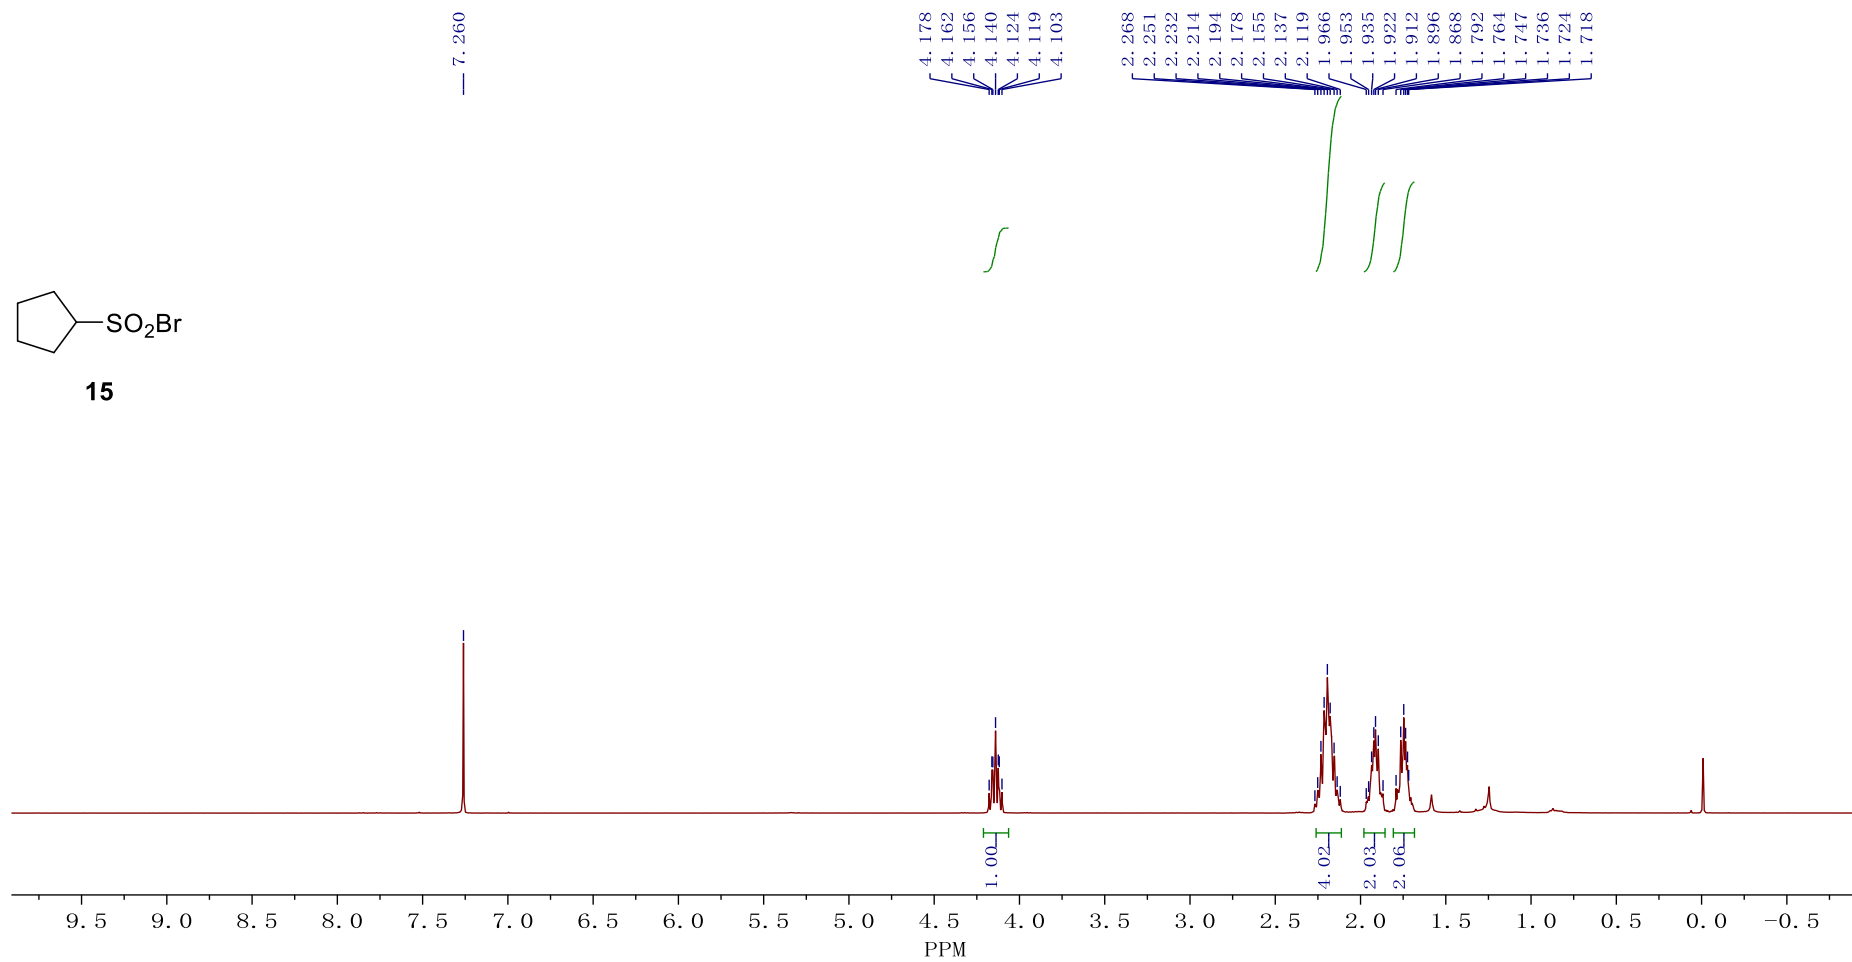

S75

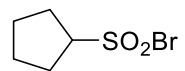

15

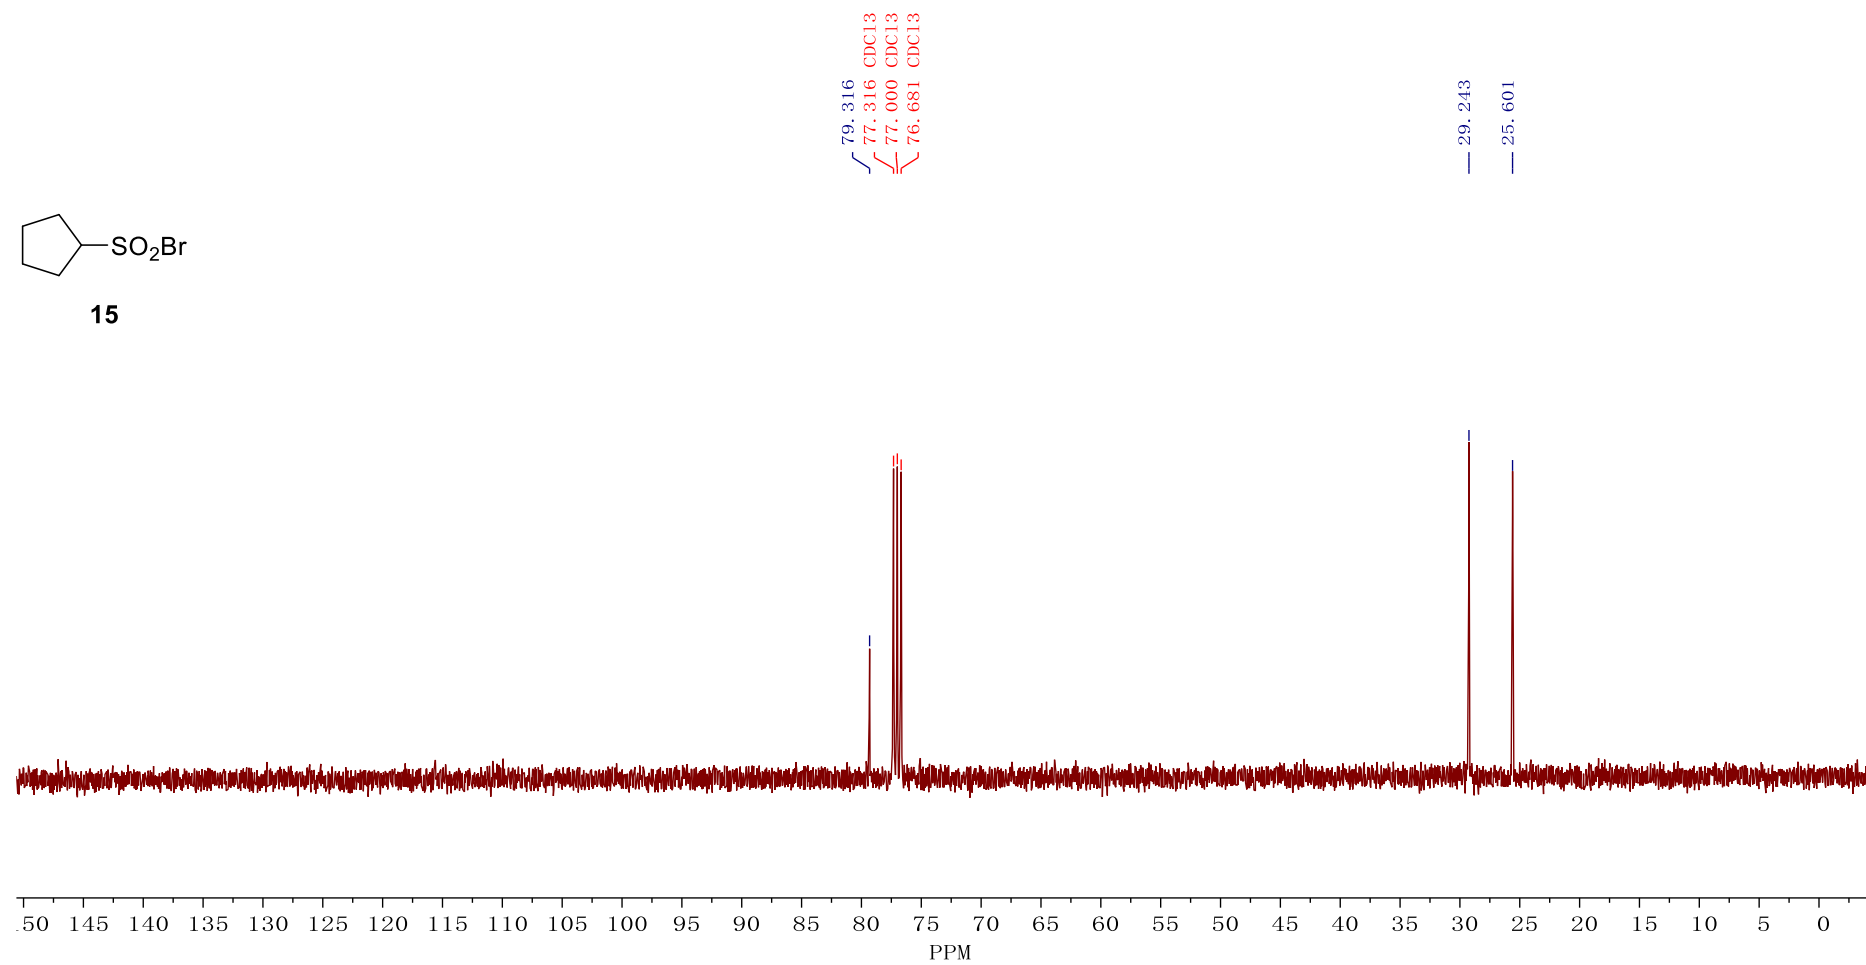

S76

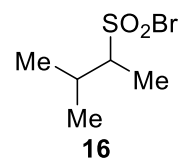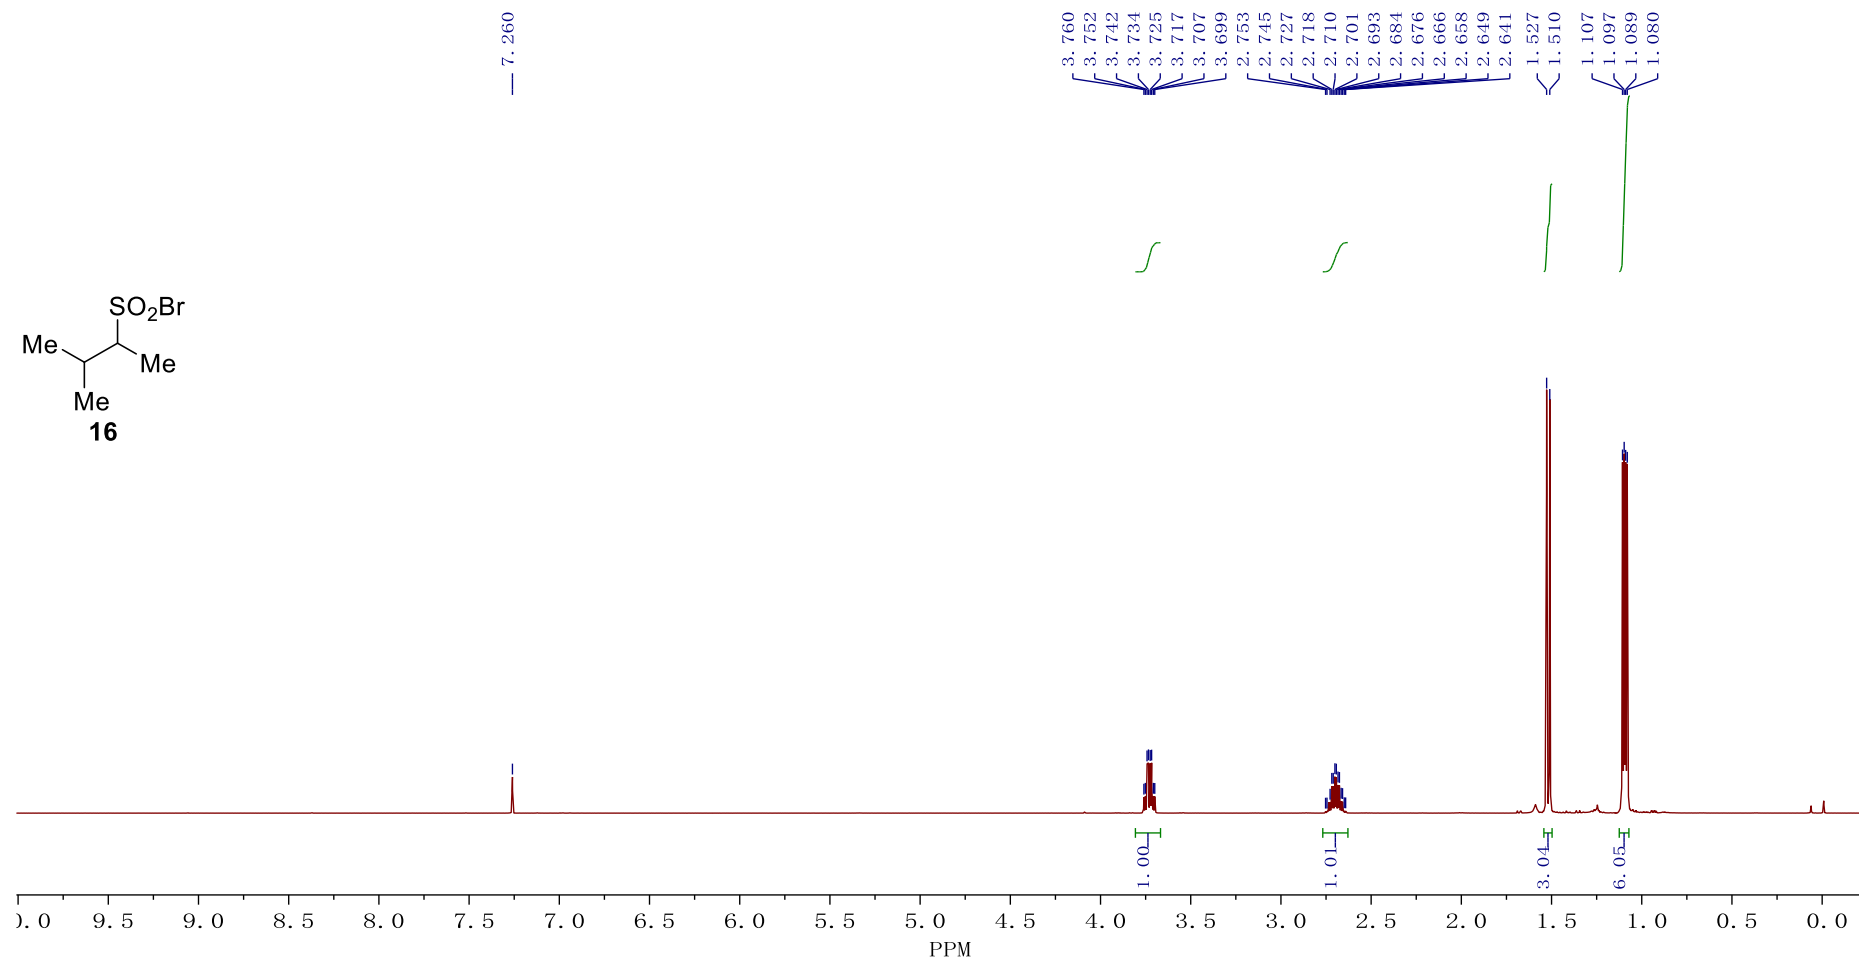

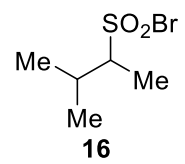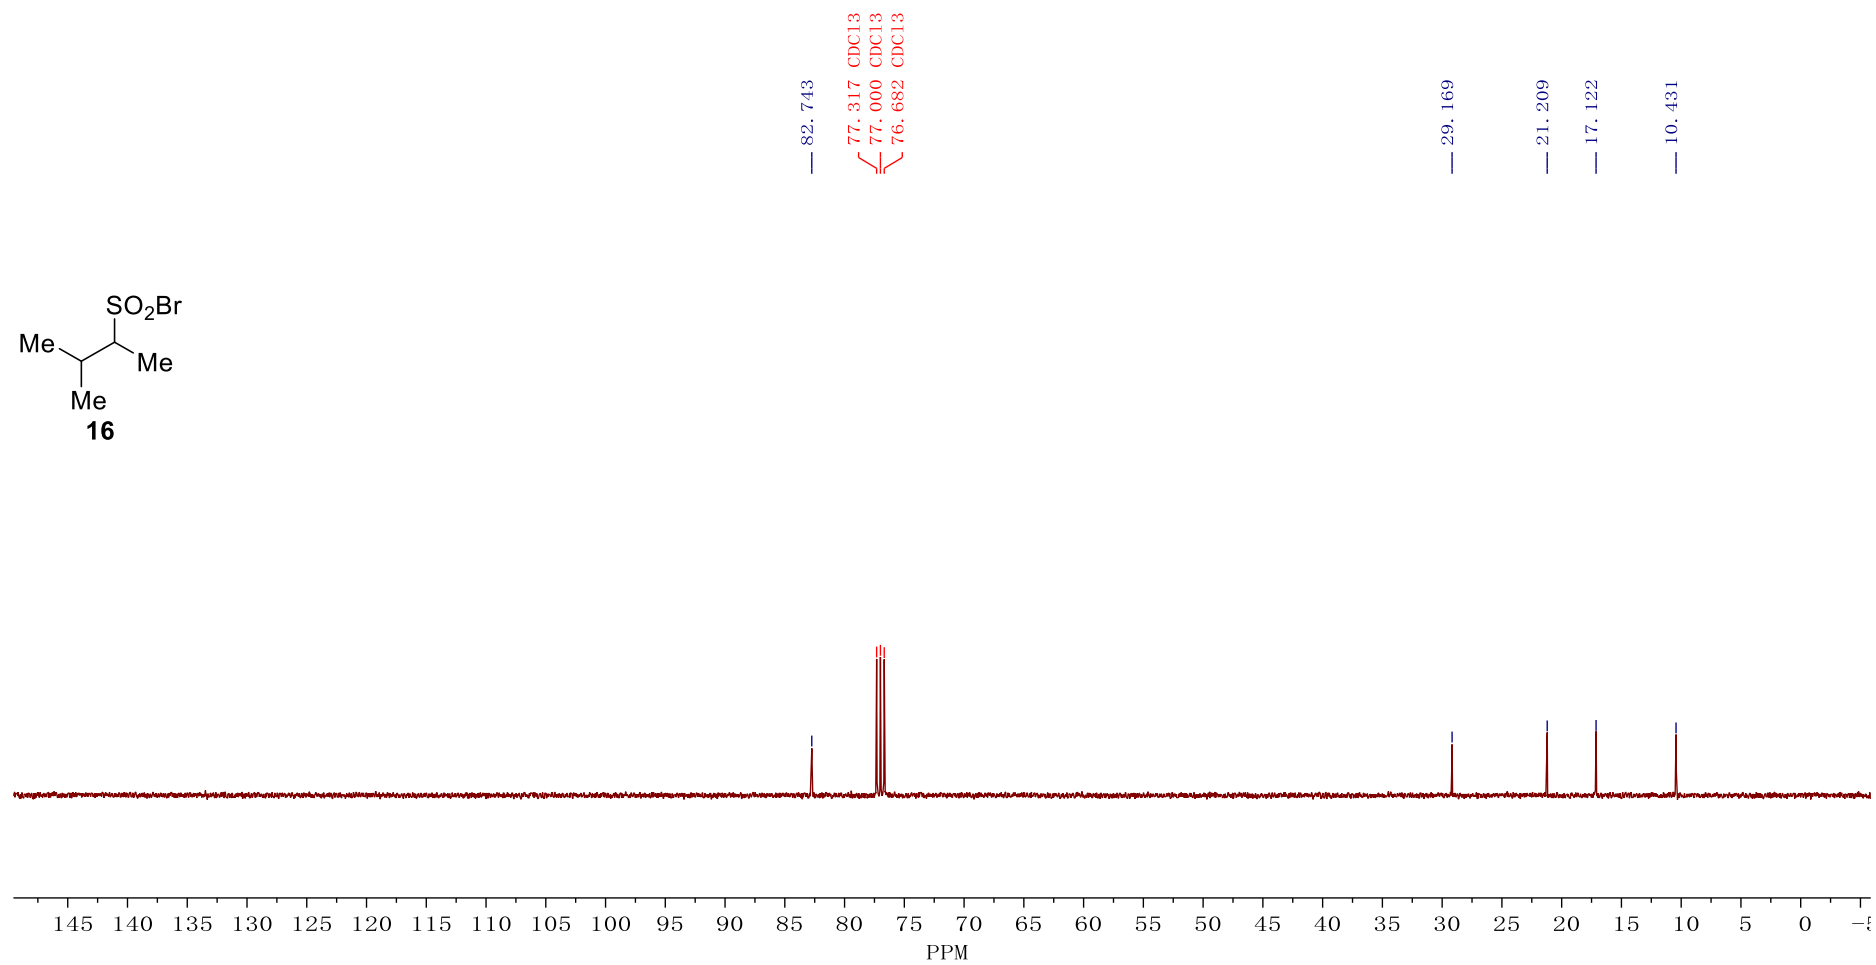

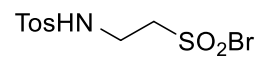

17

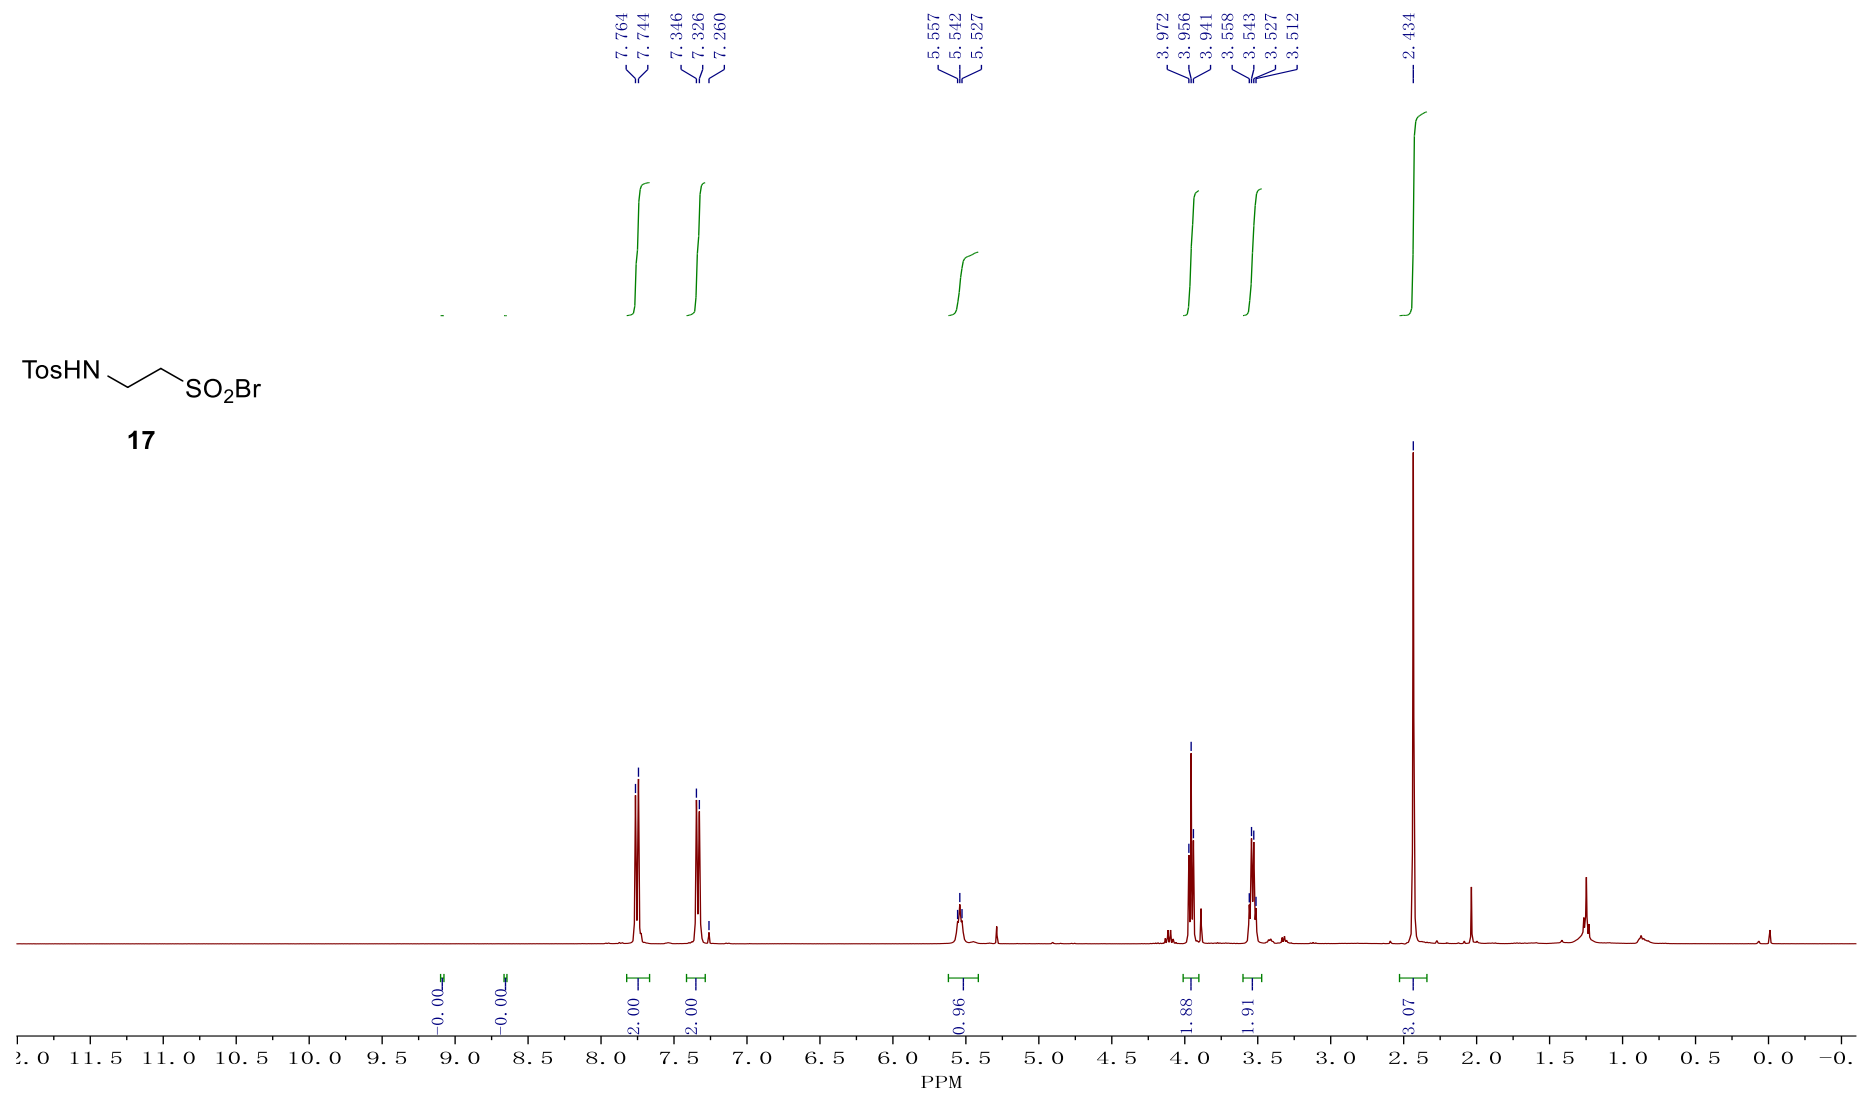

S79

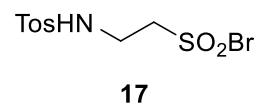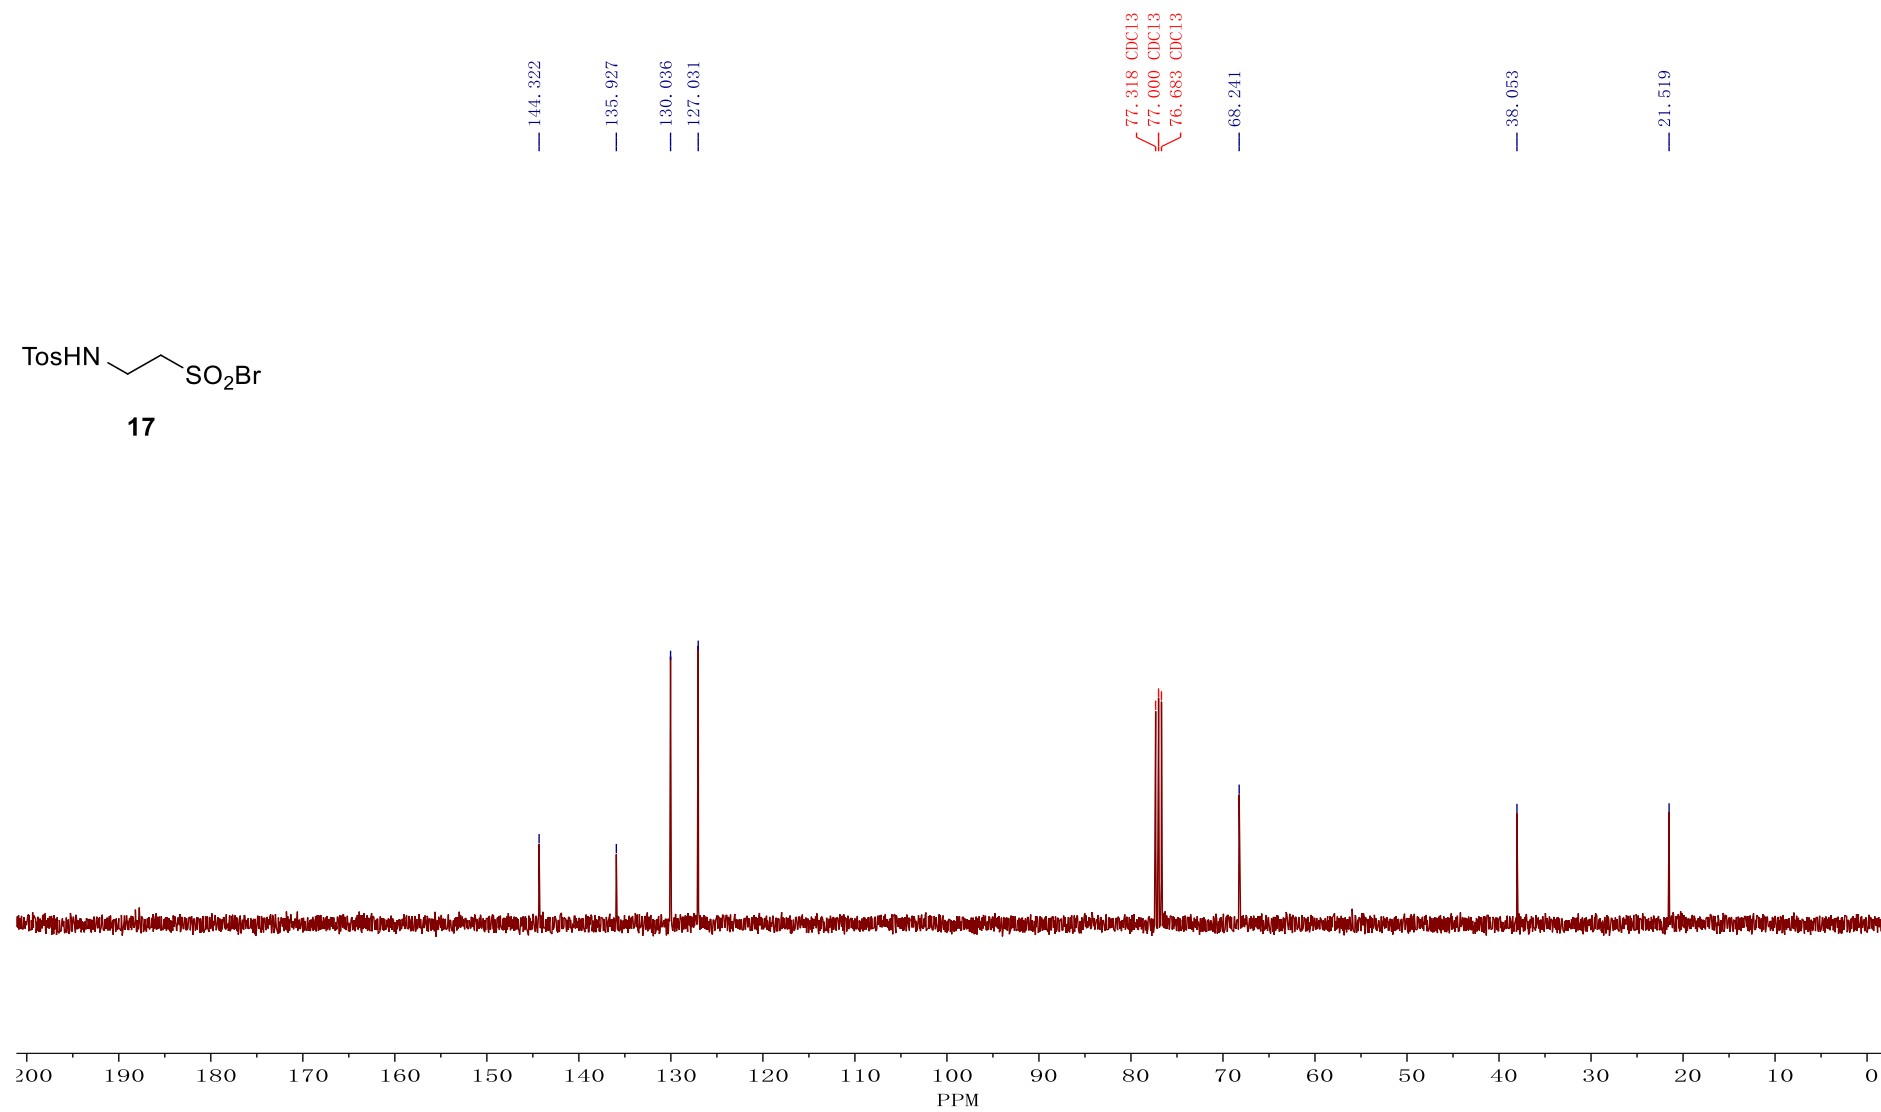

S80



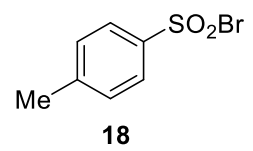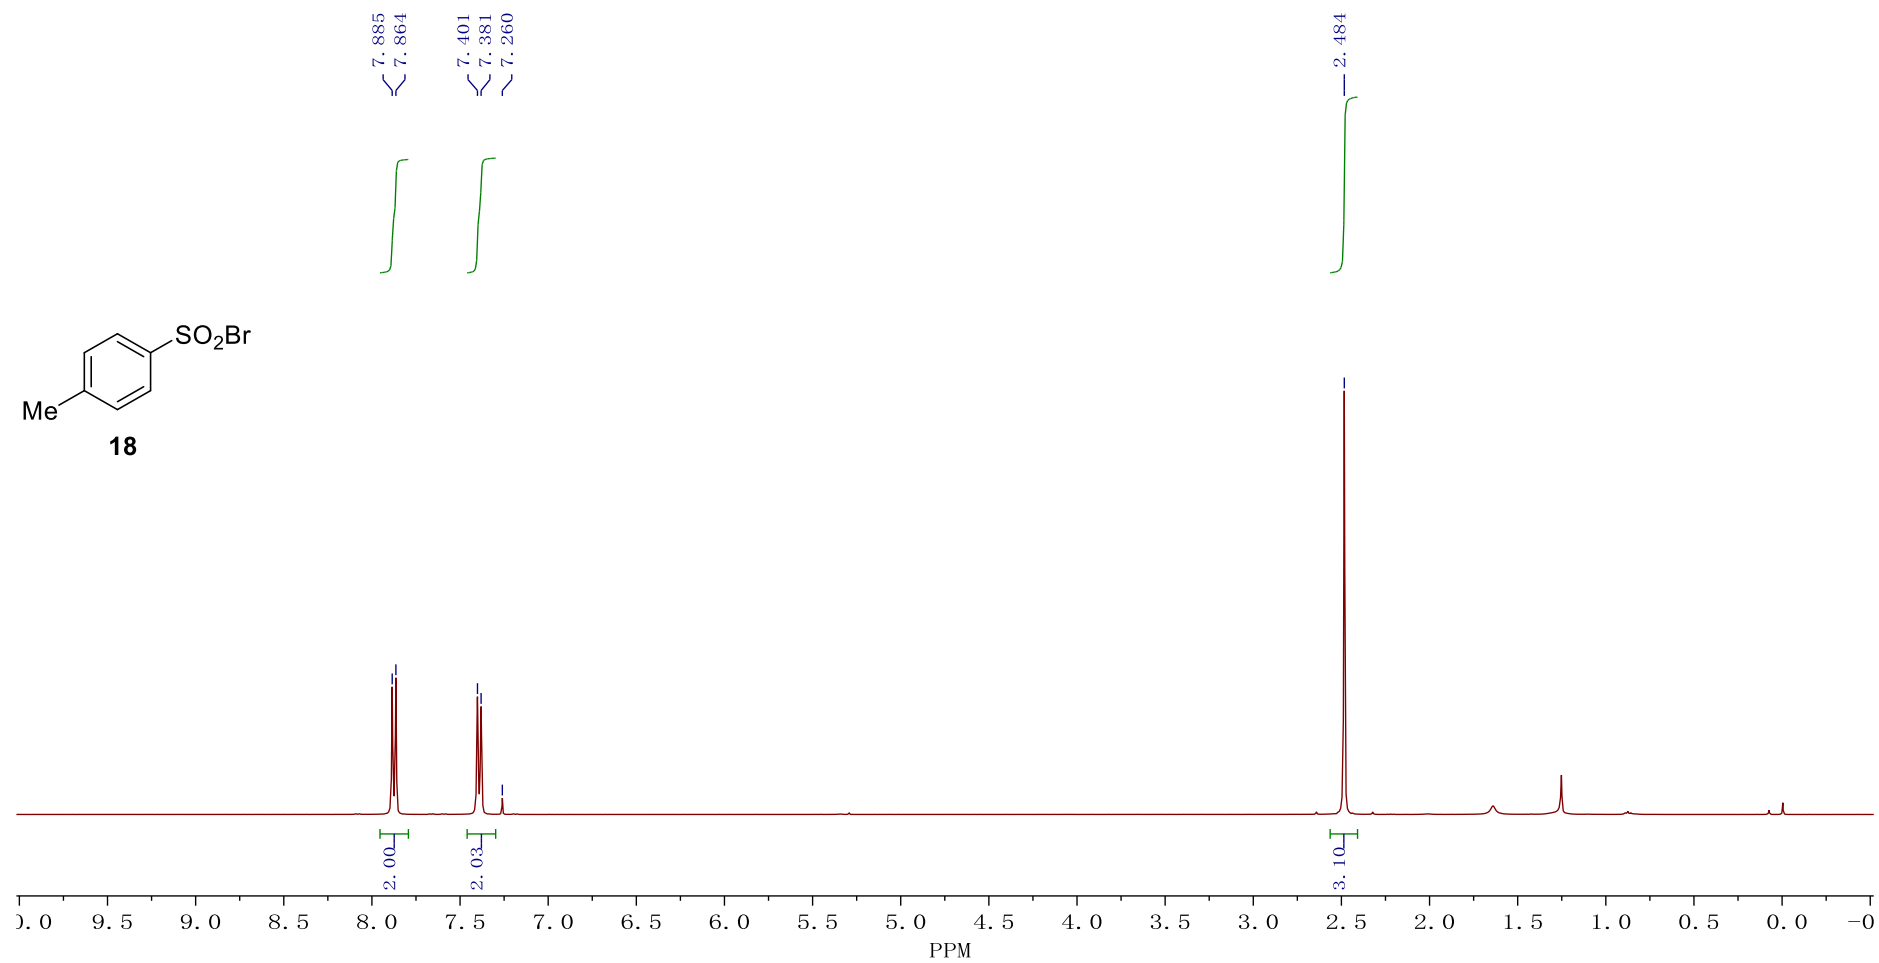

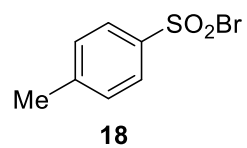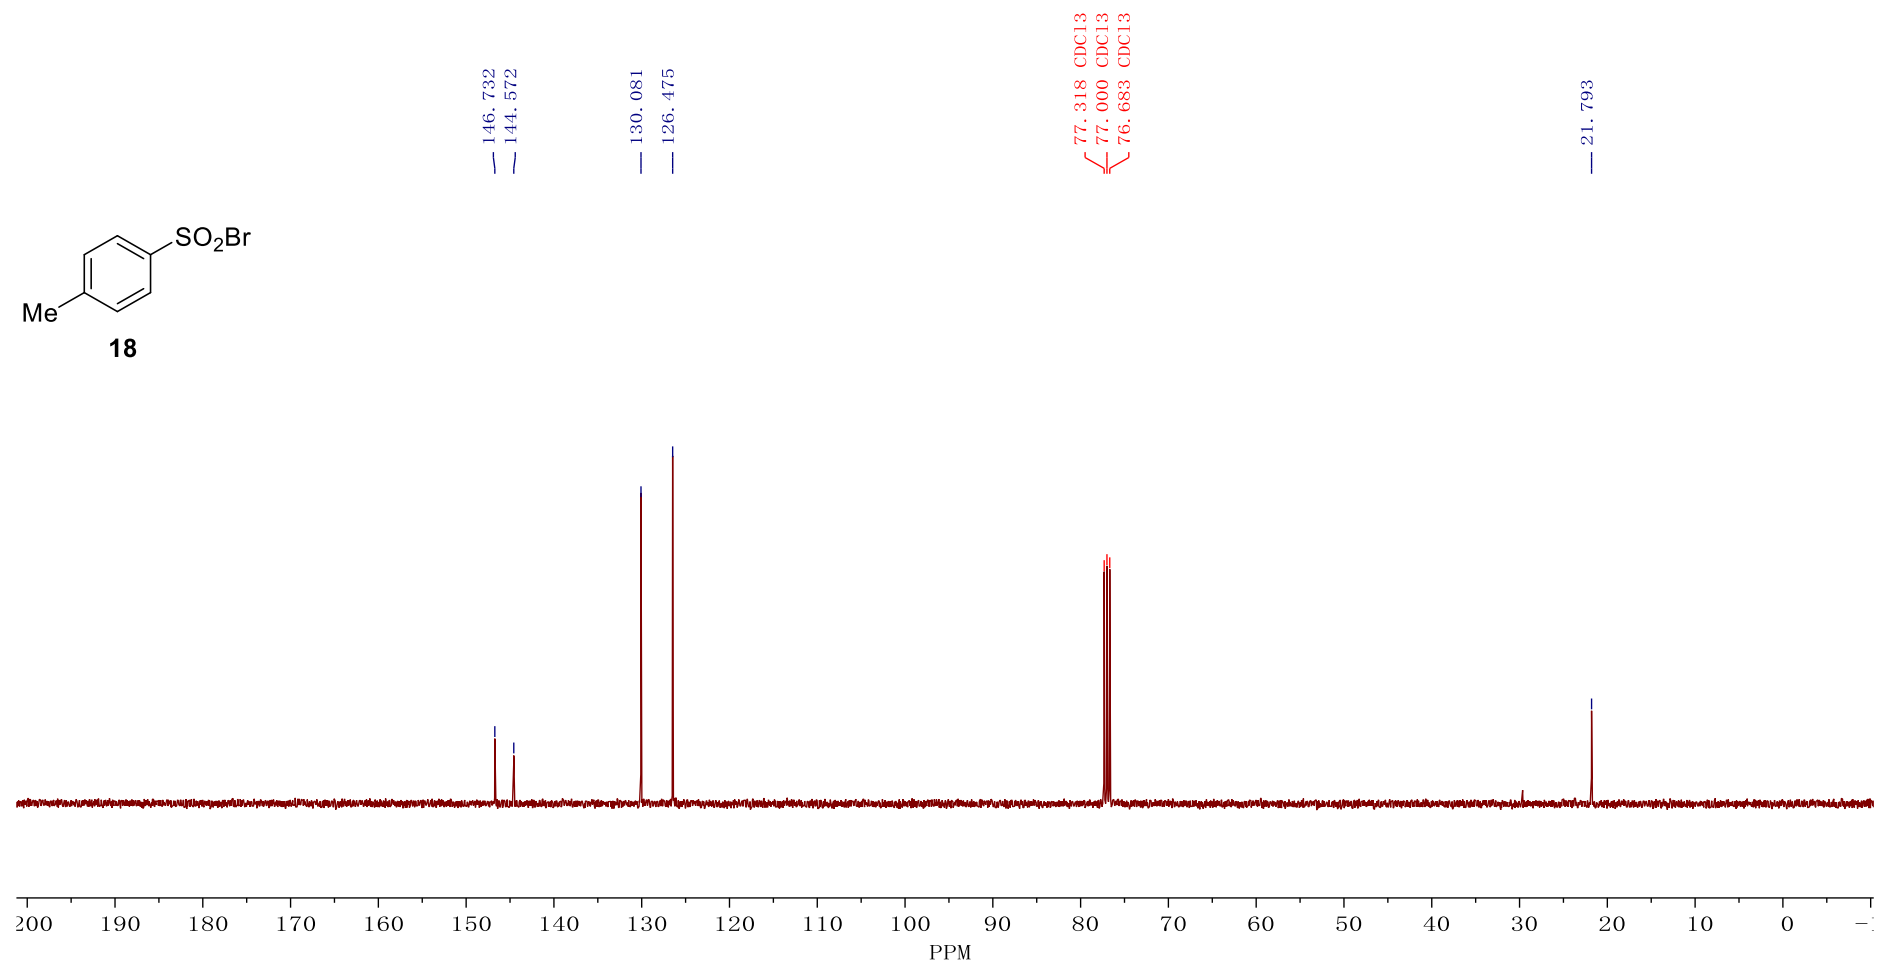

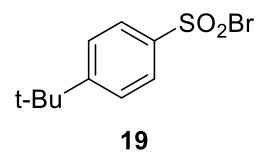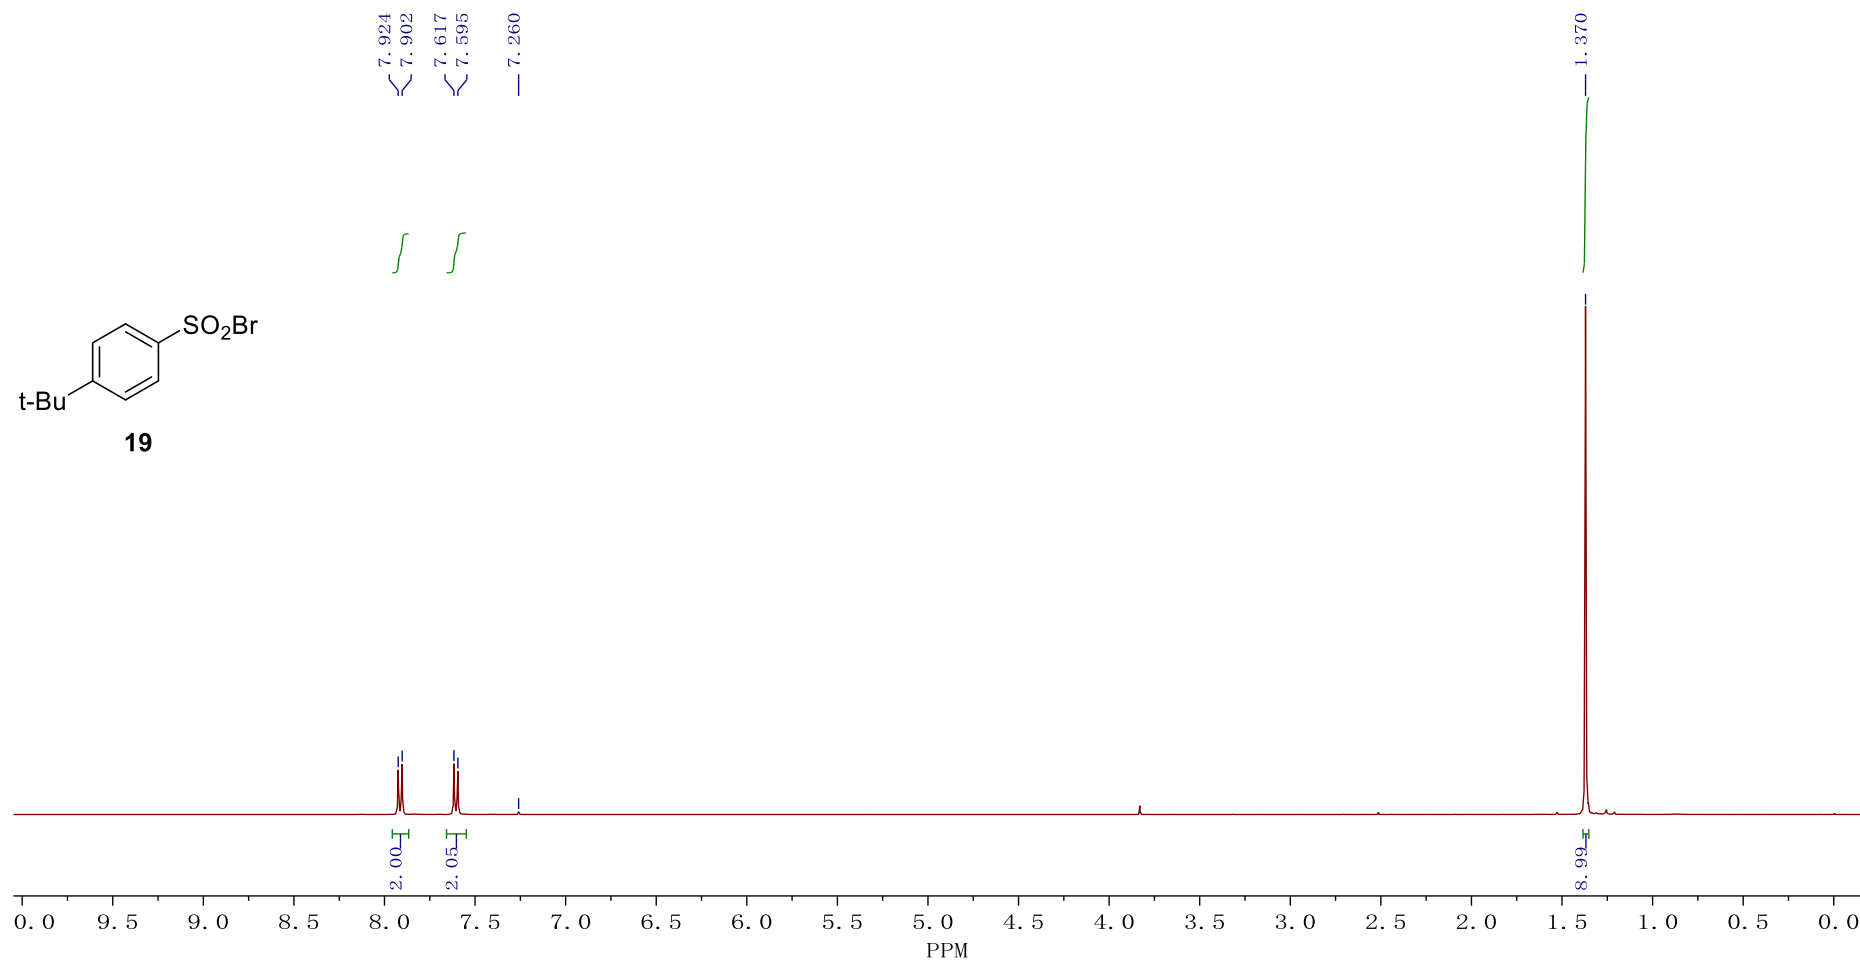

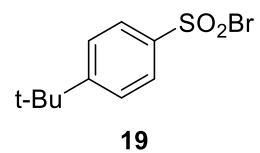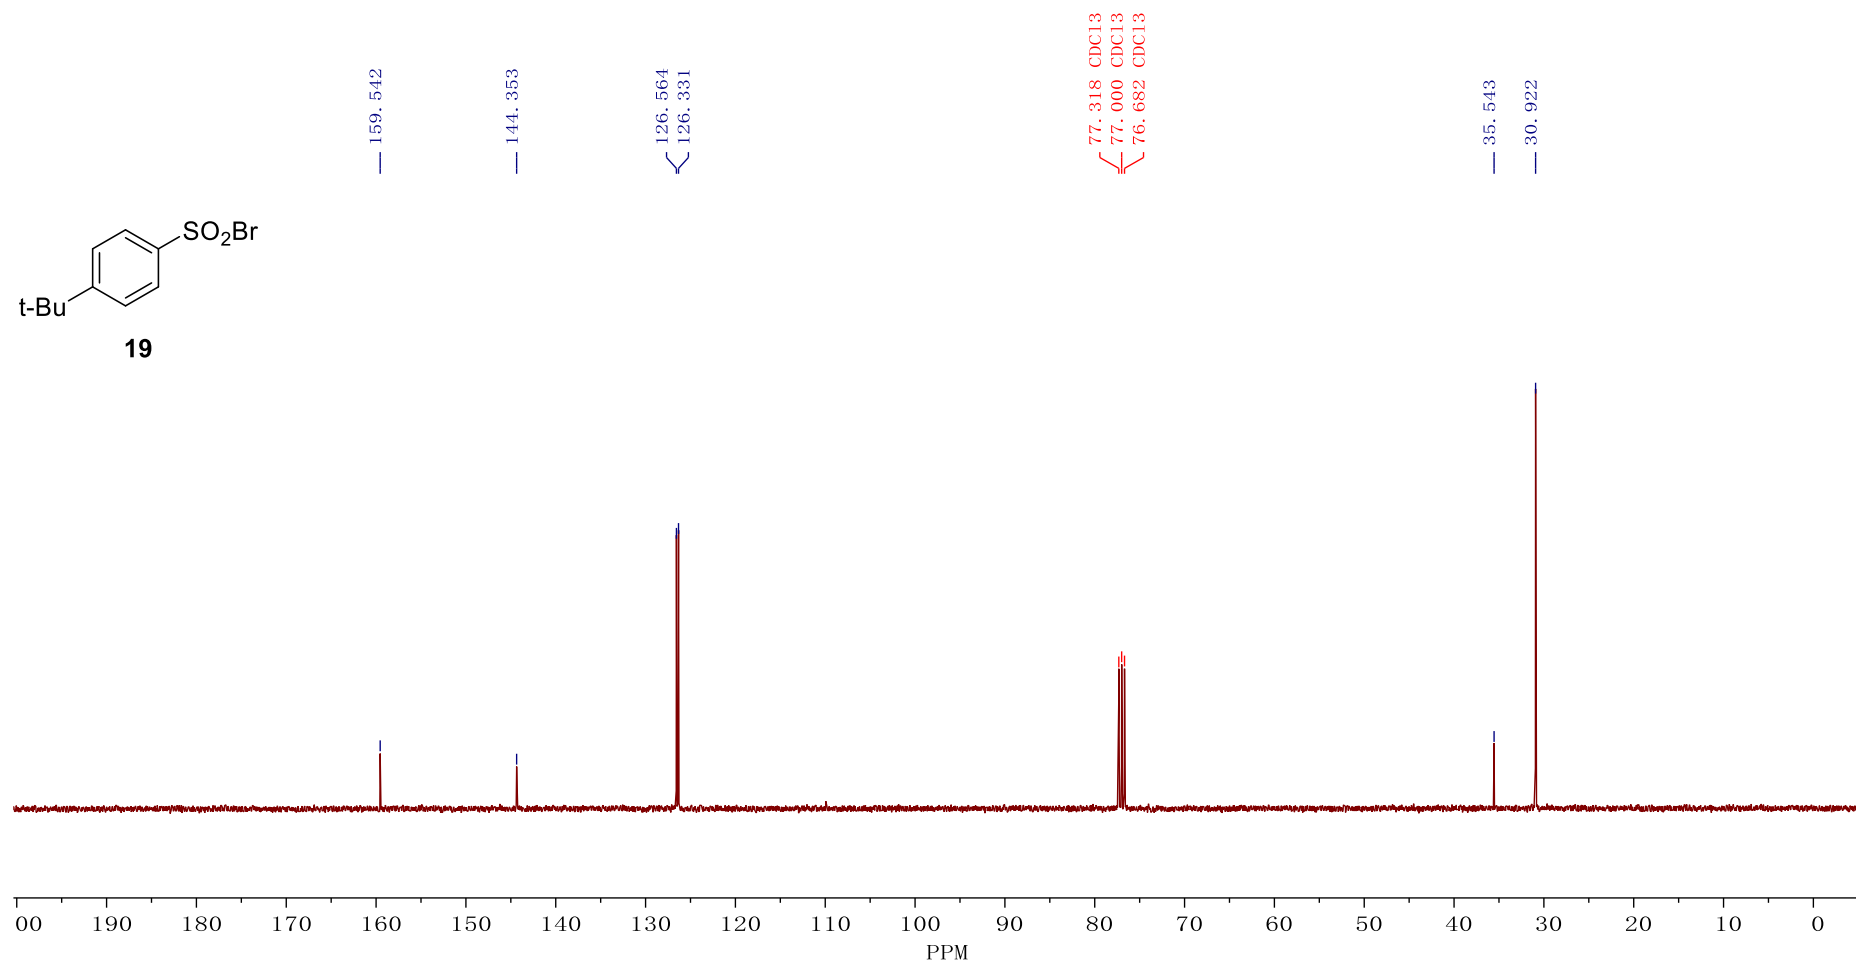

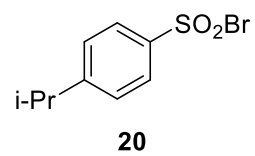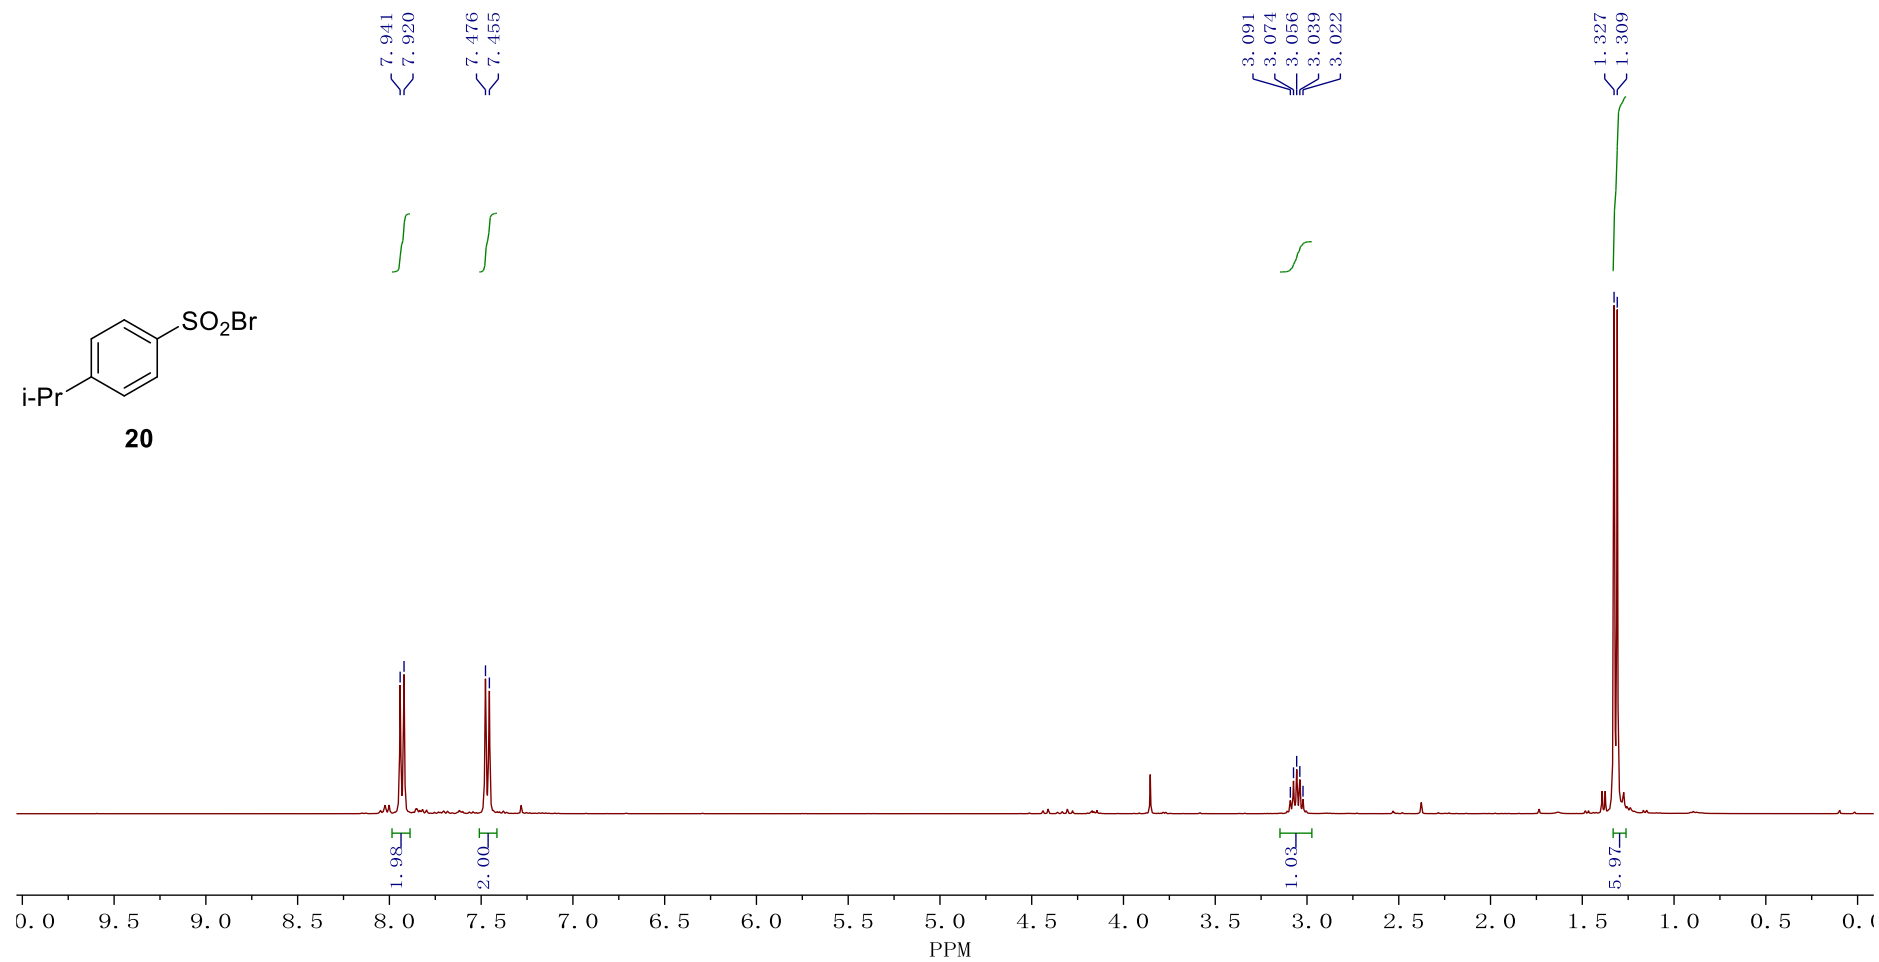

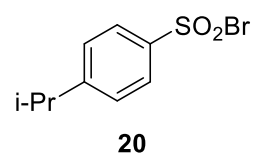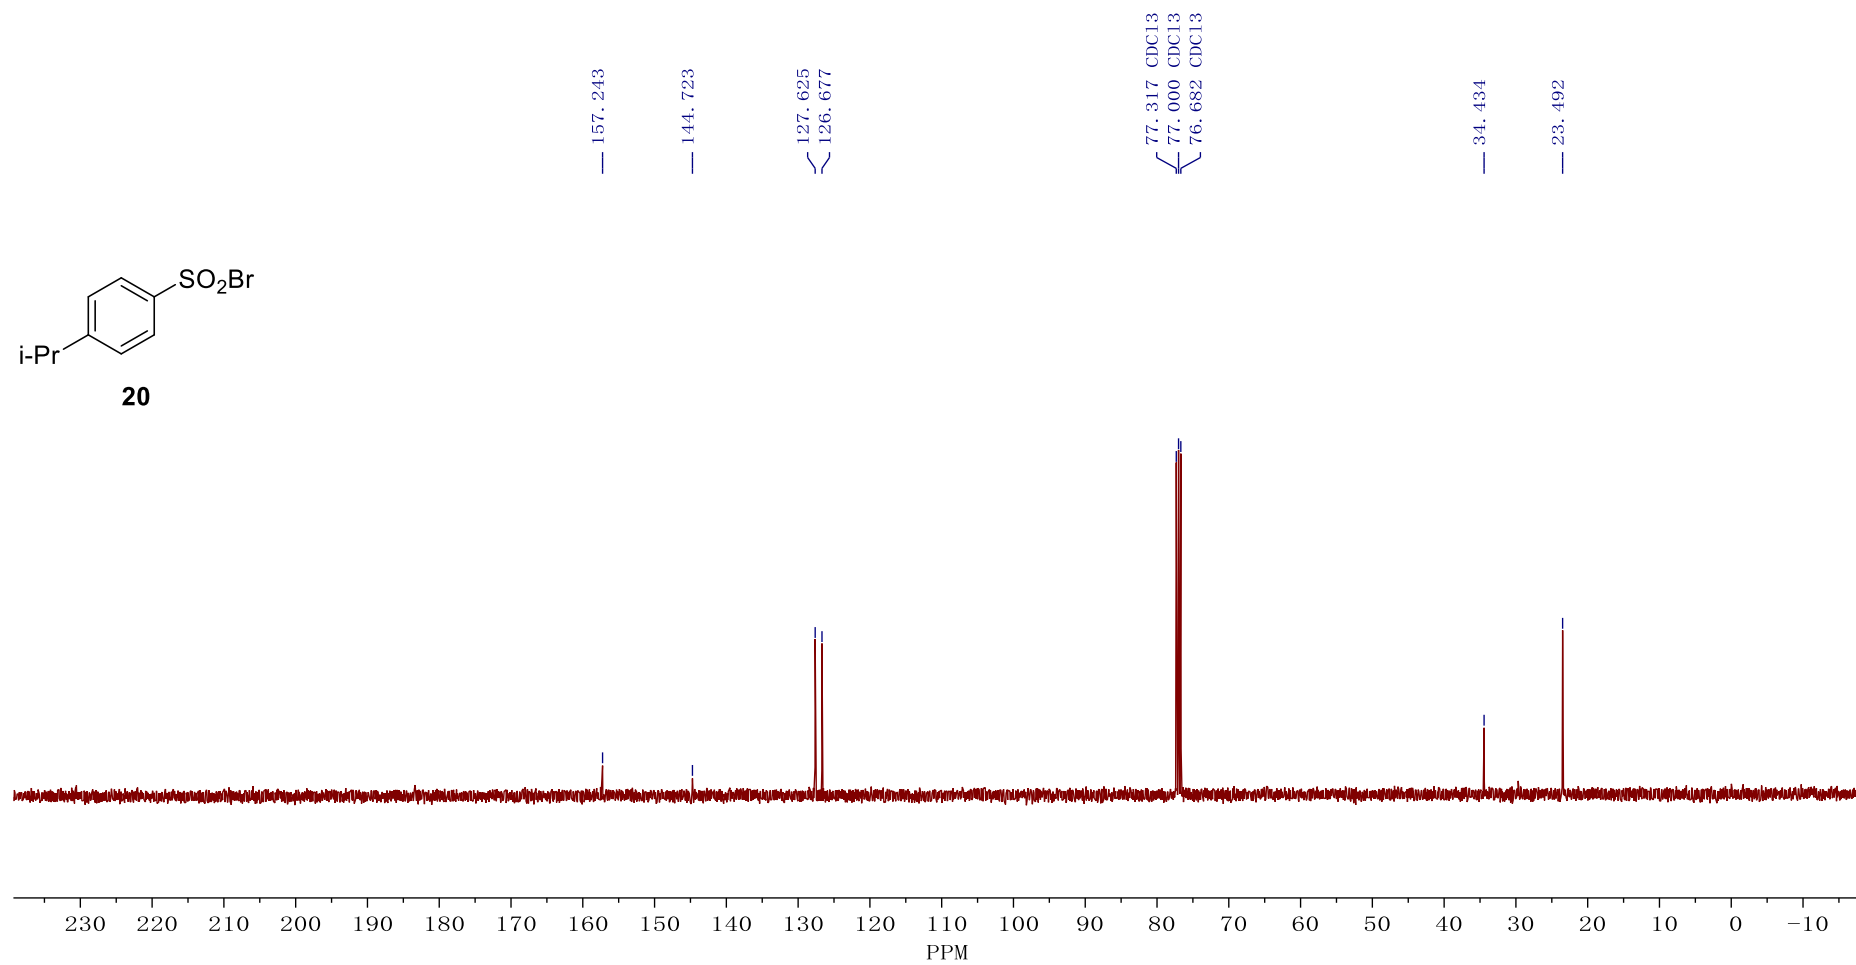

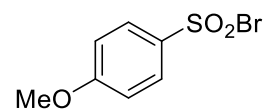

21

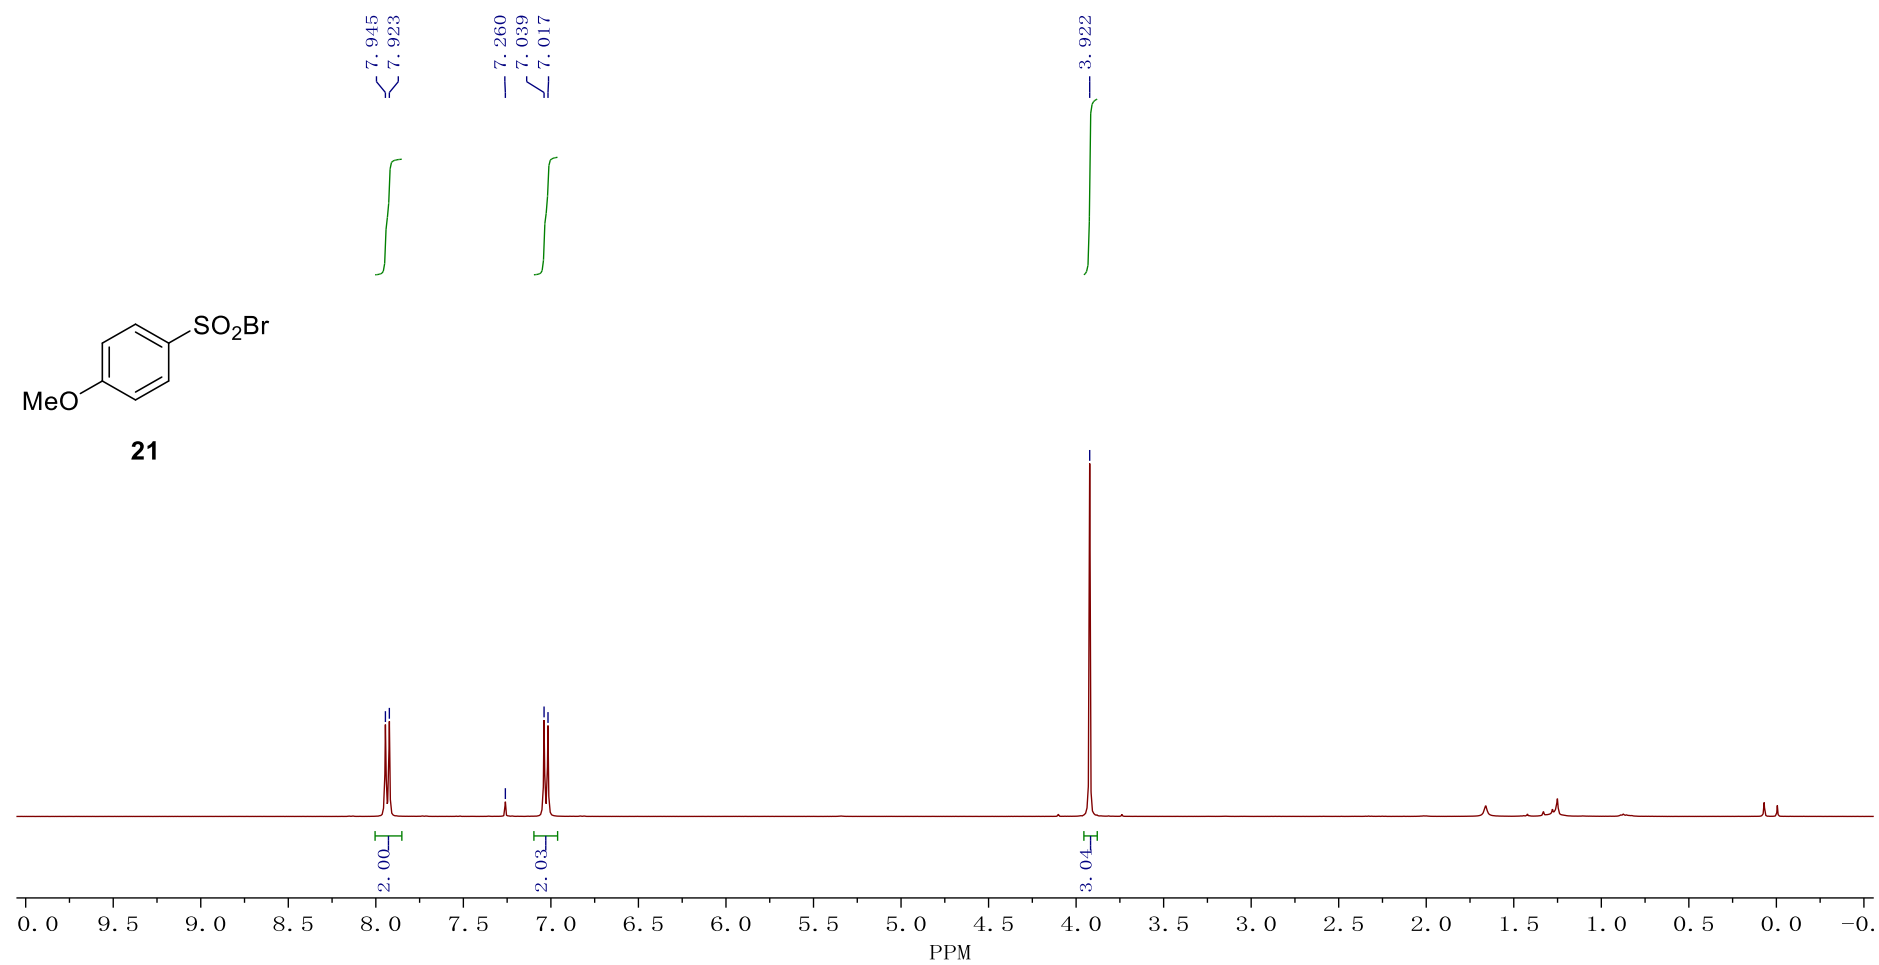

S87

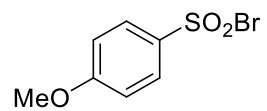

21

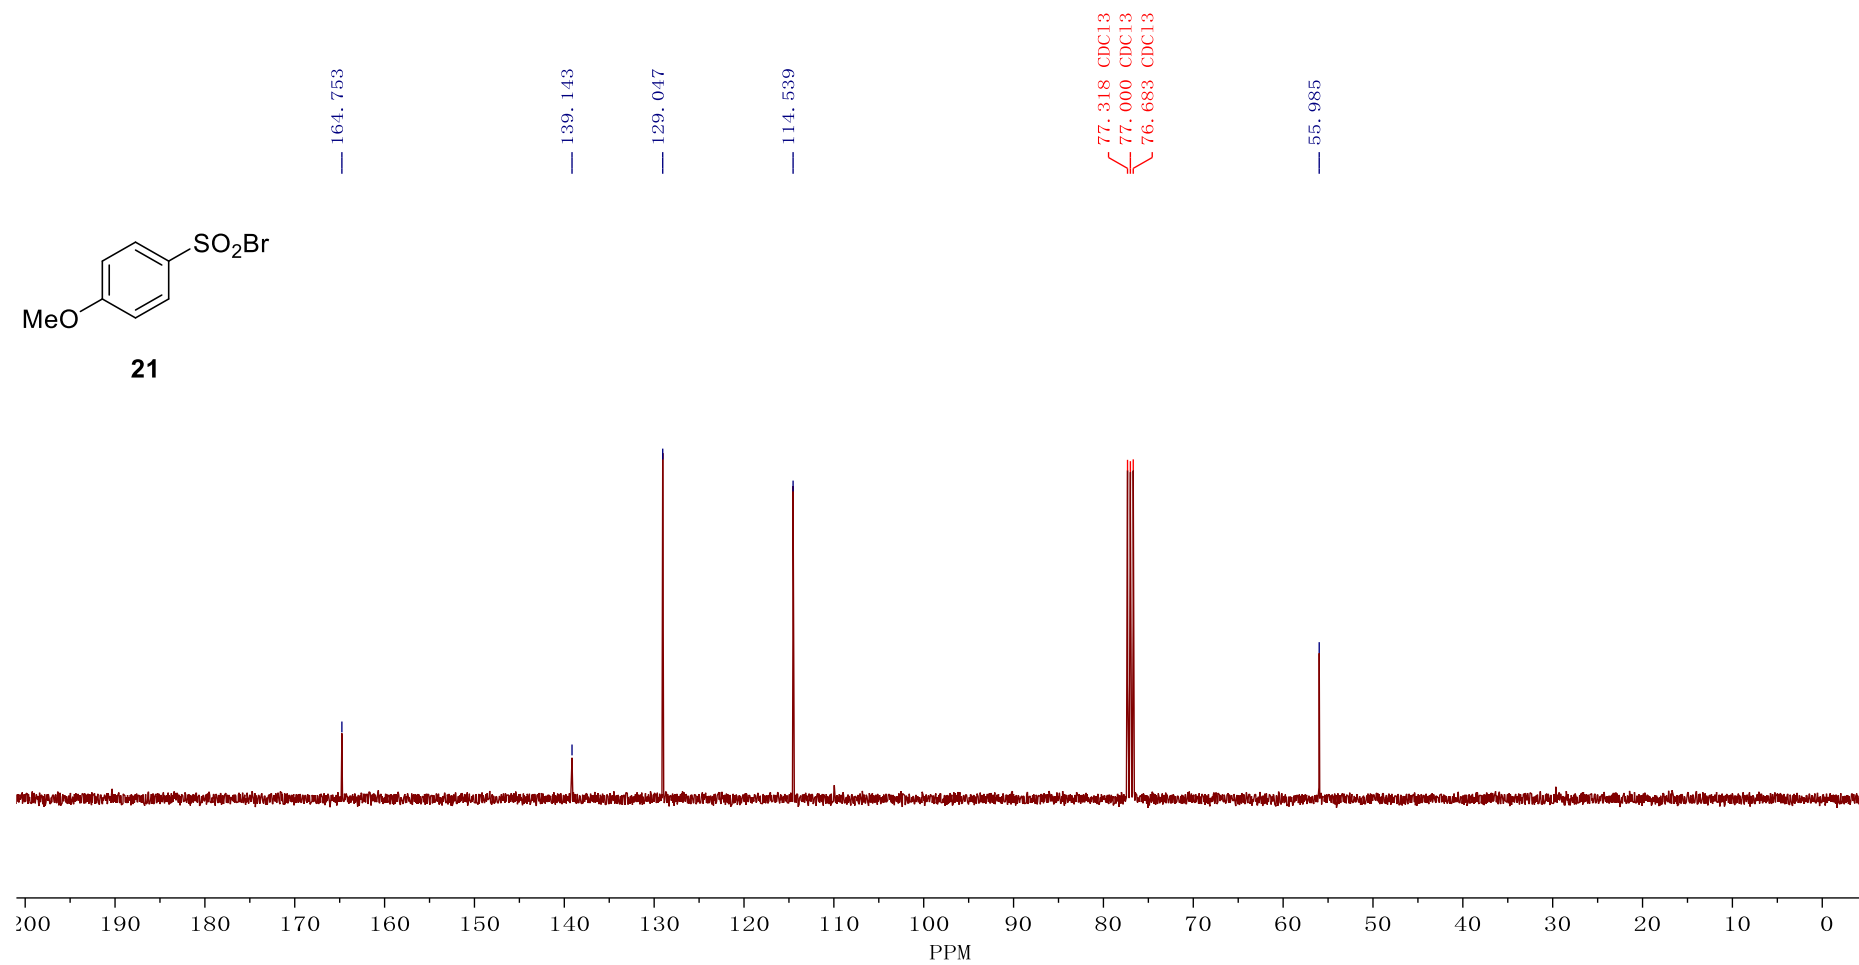

S88



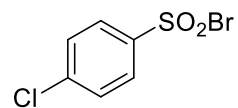

22

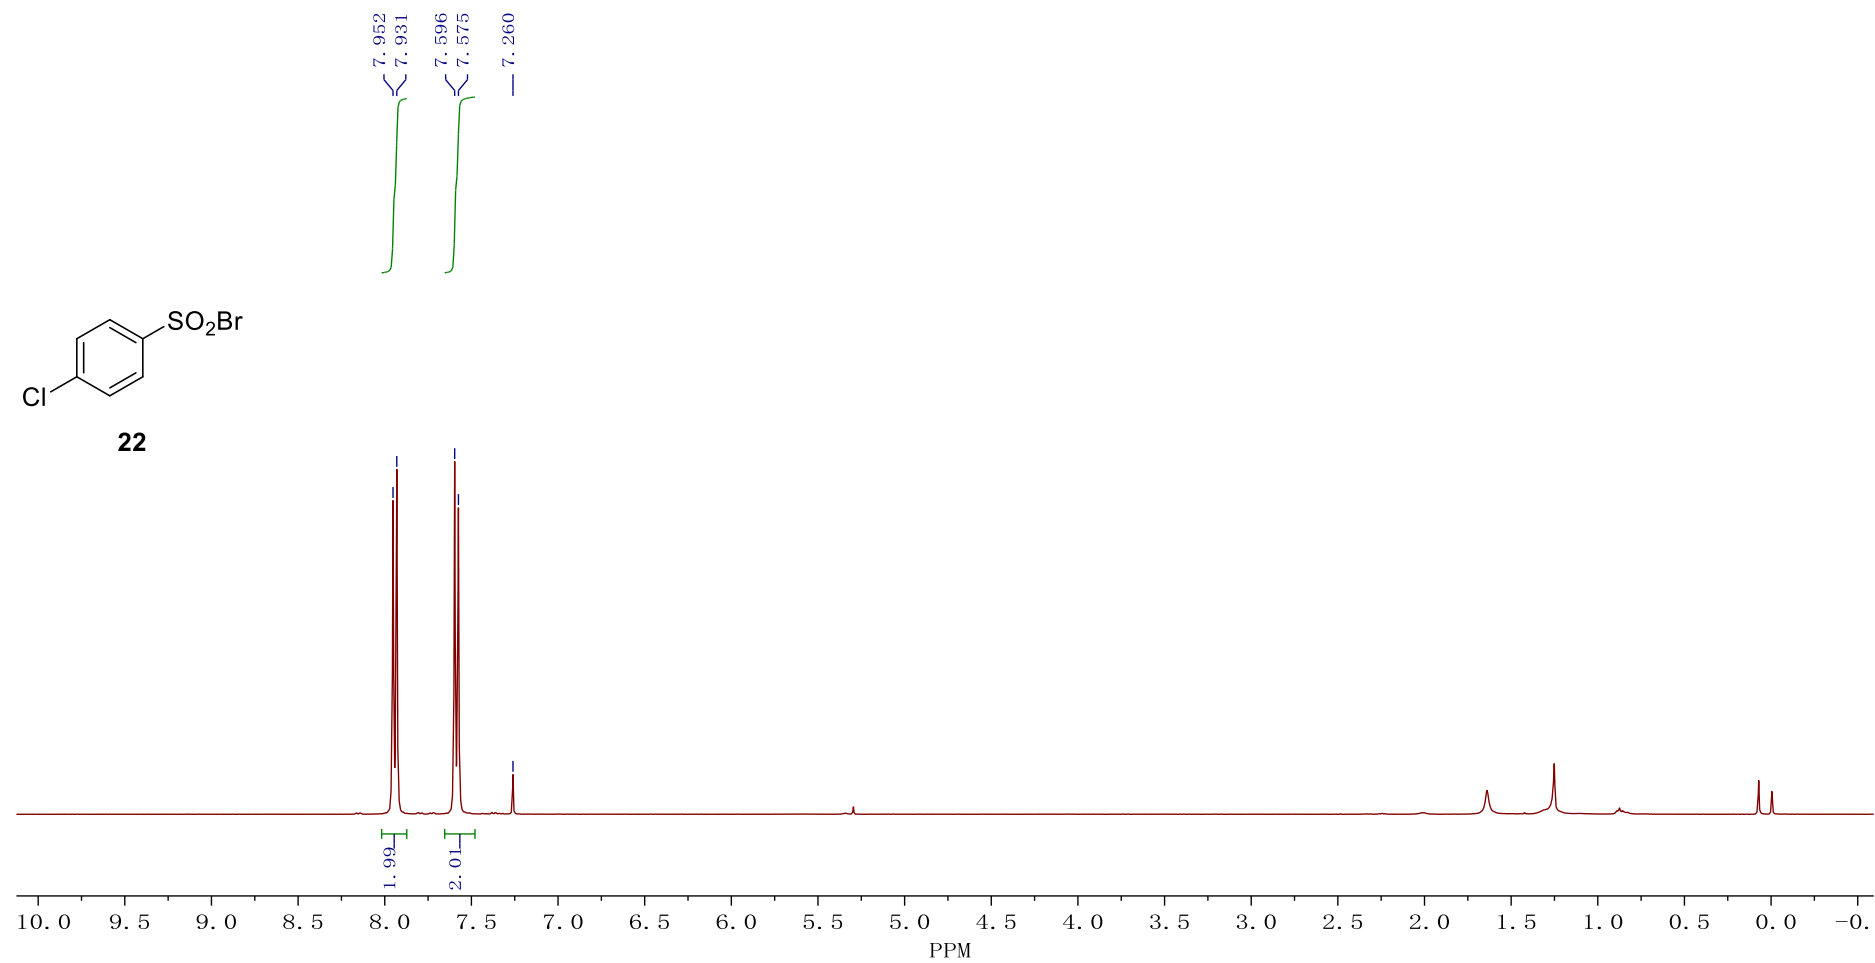

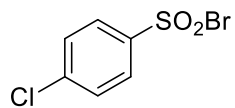

**22**

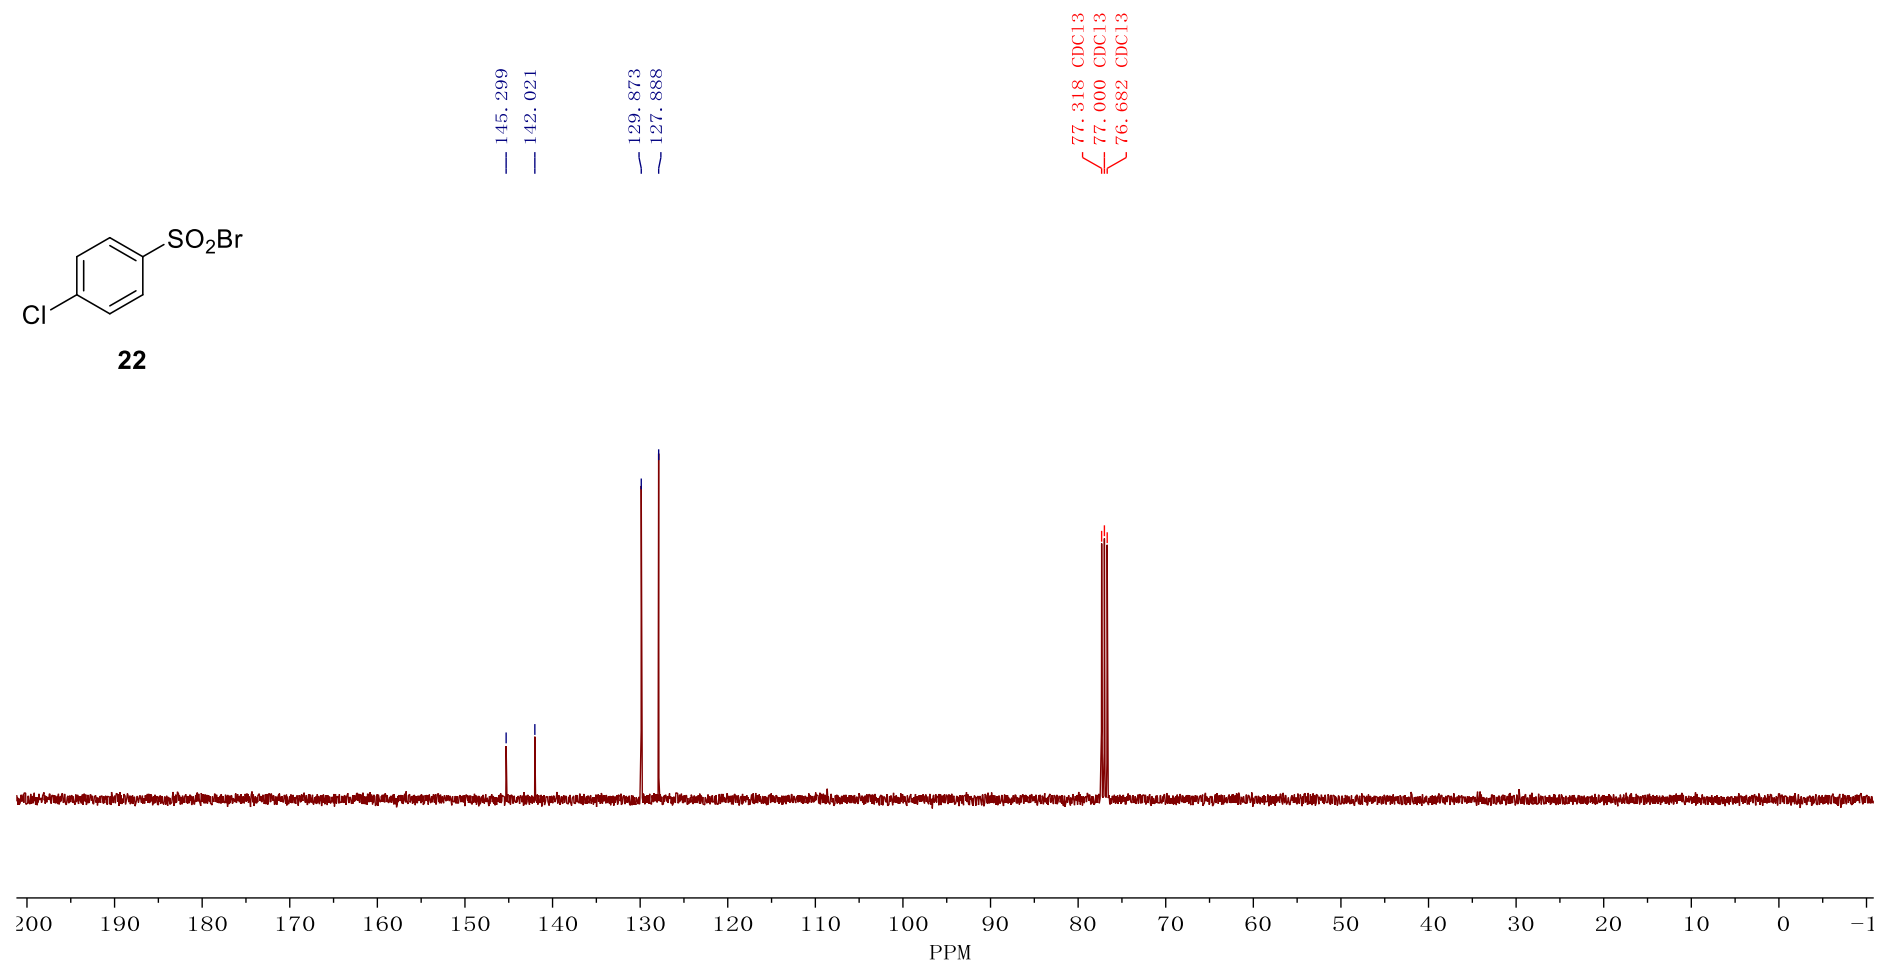

S90

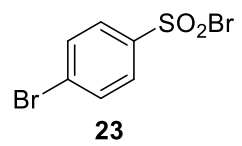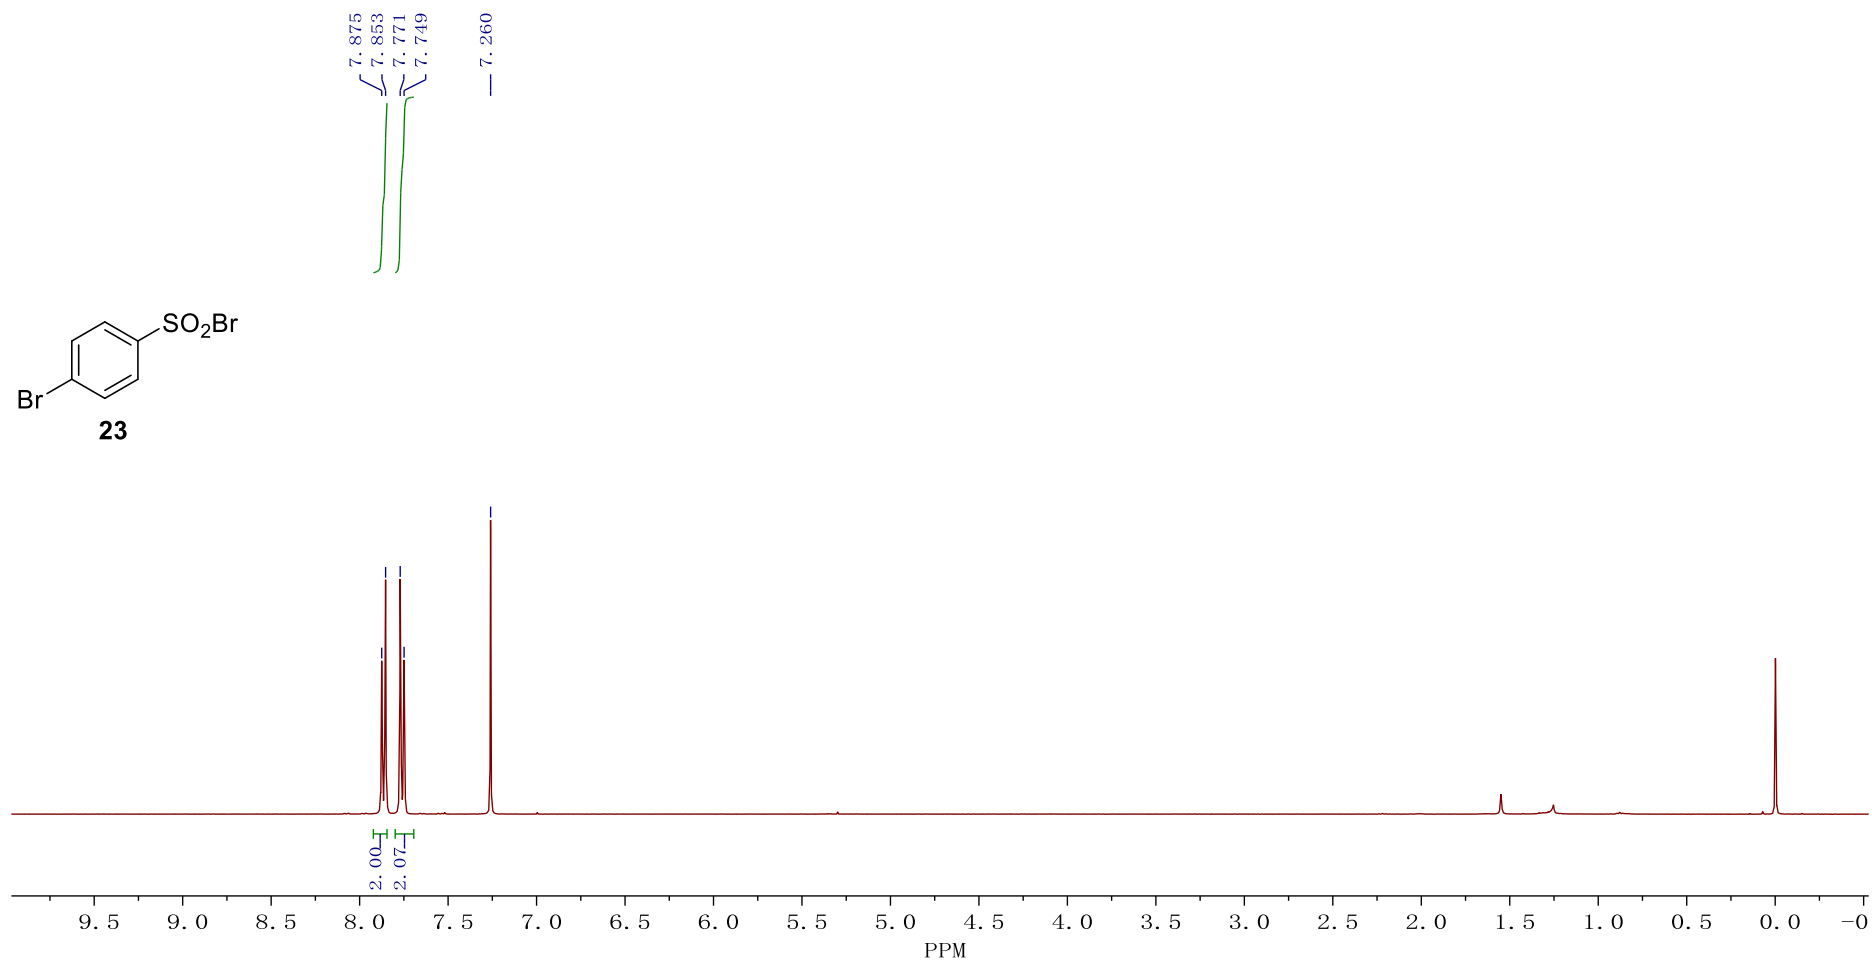

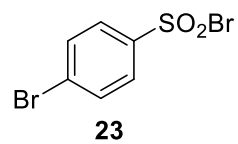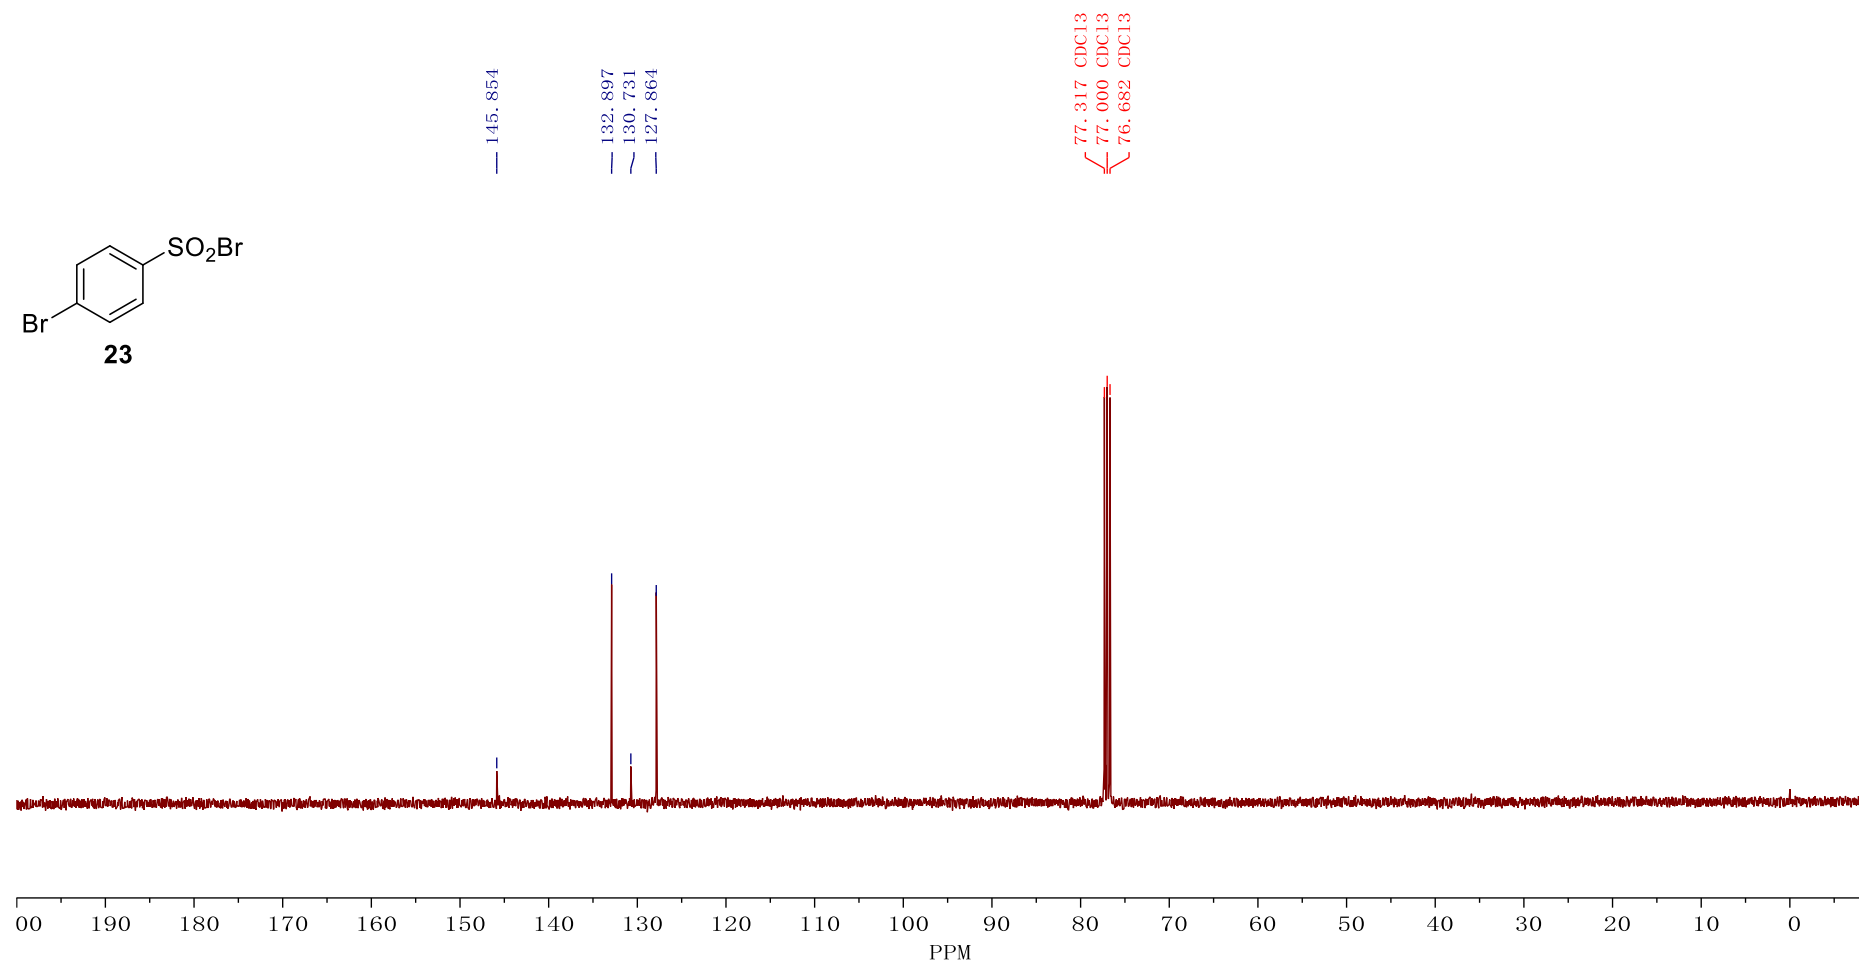

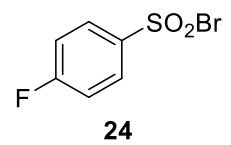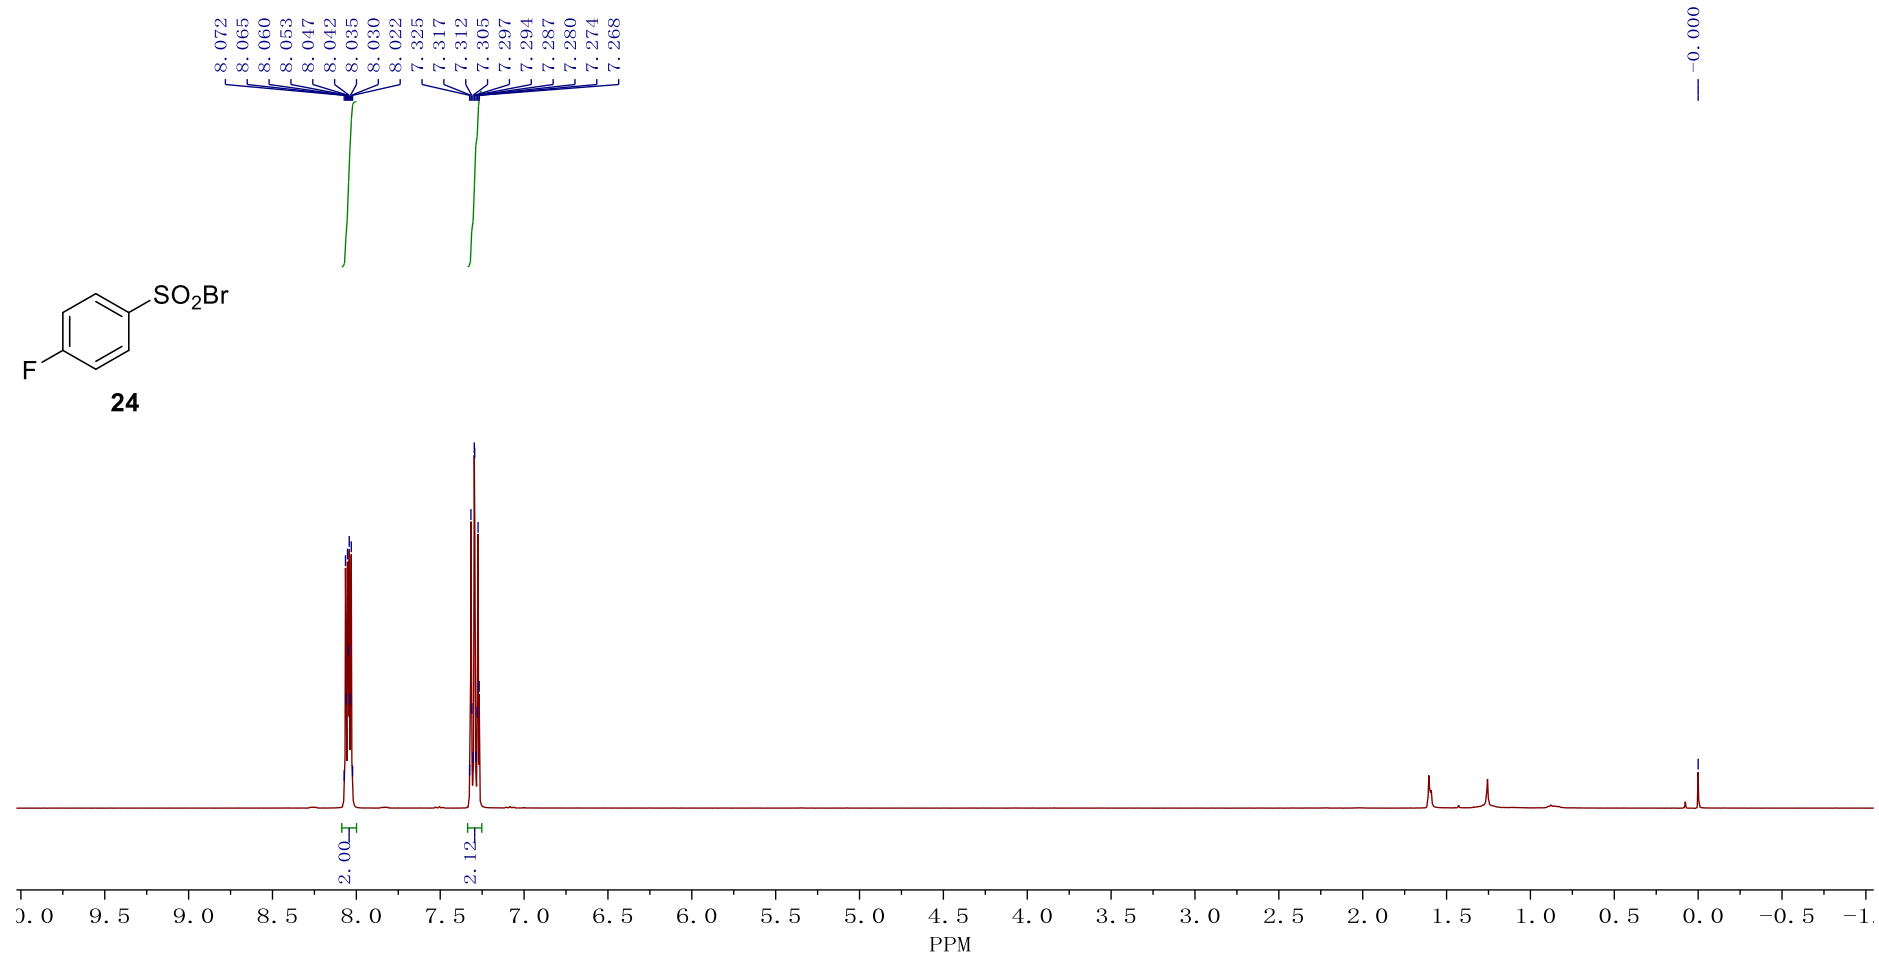

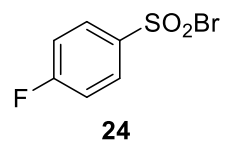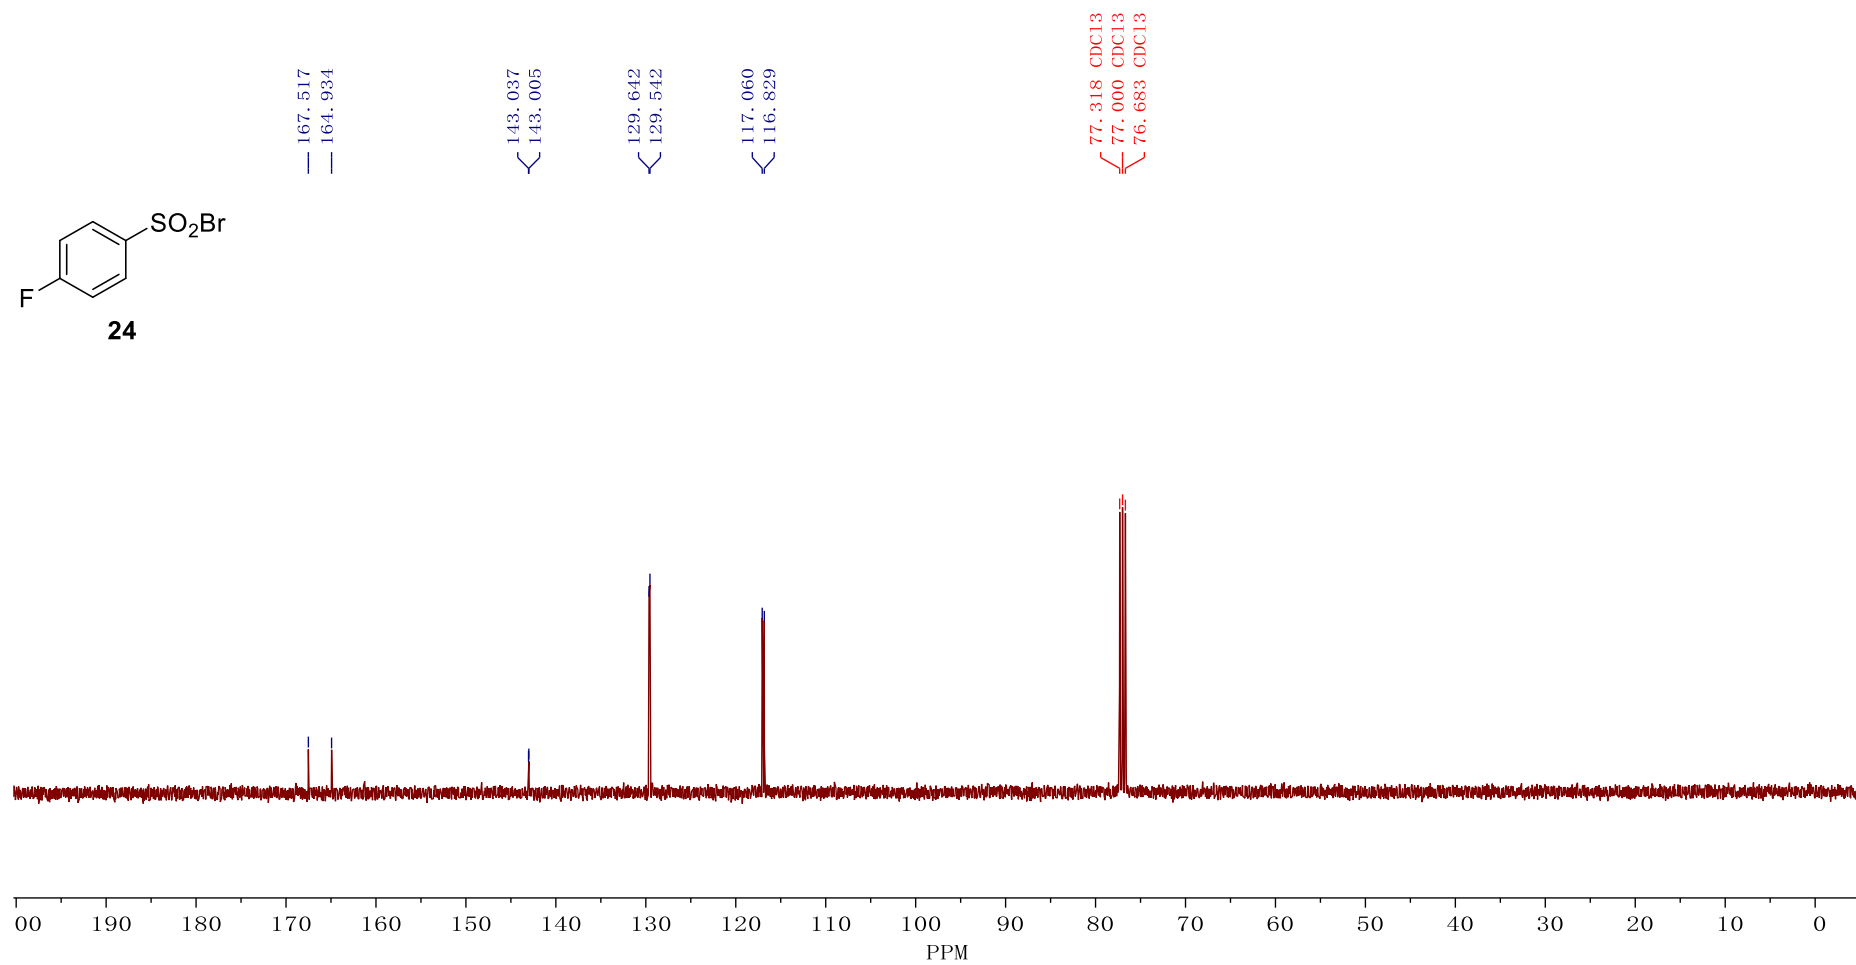

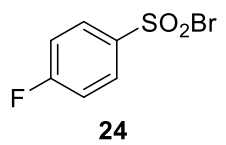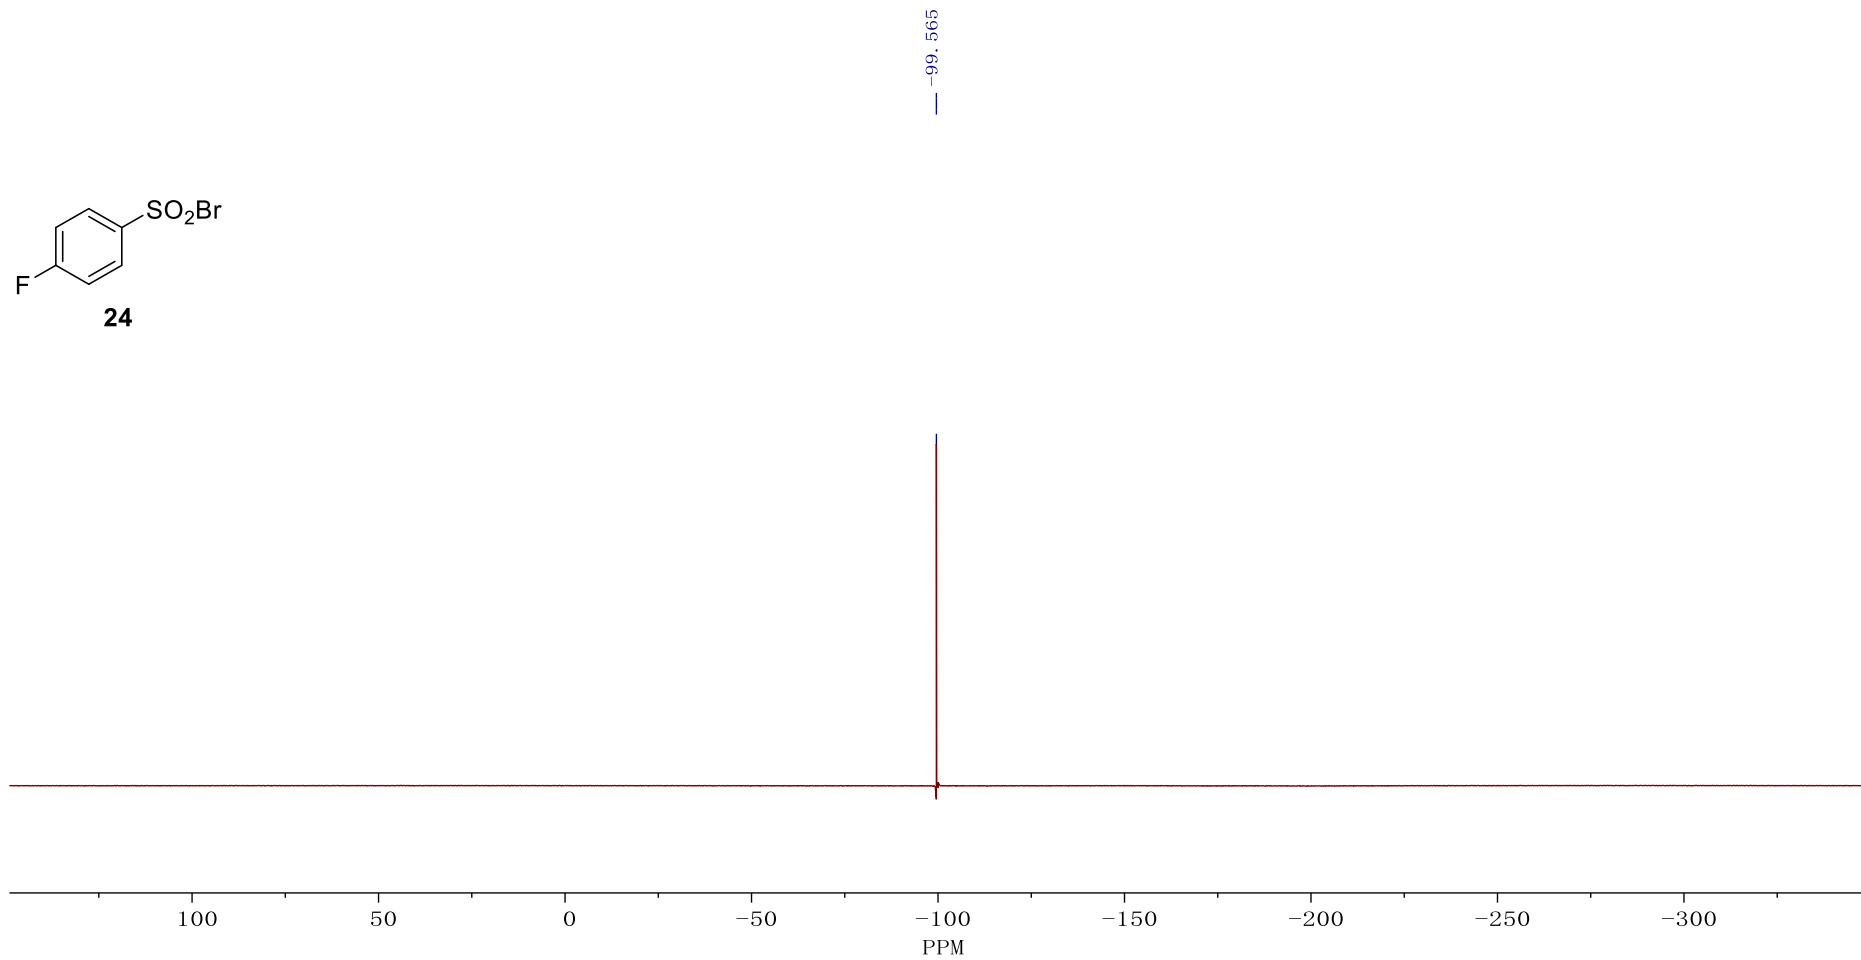

S95

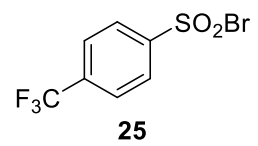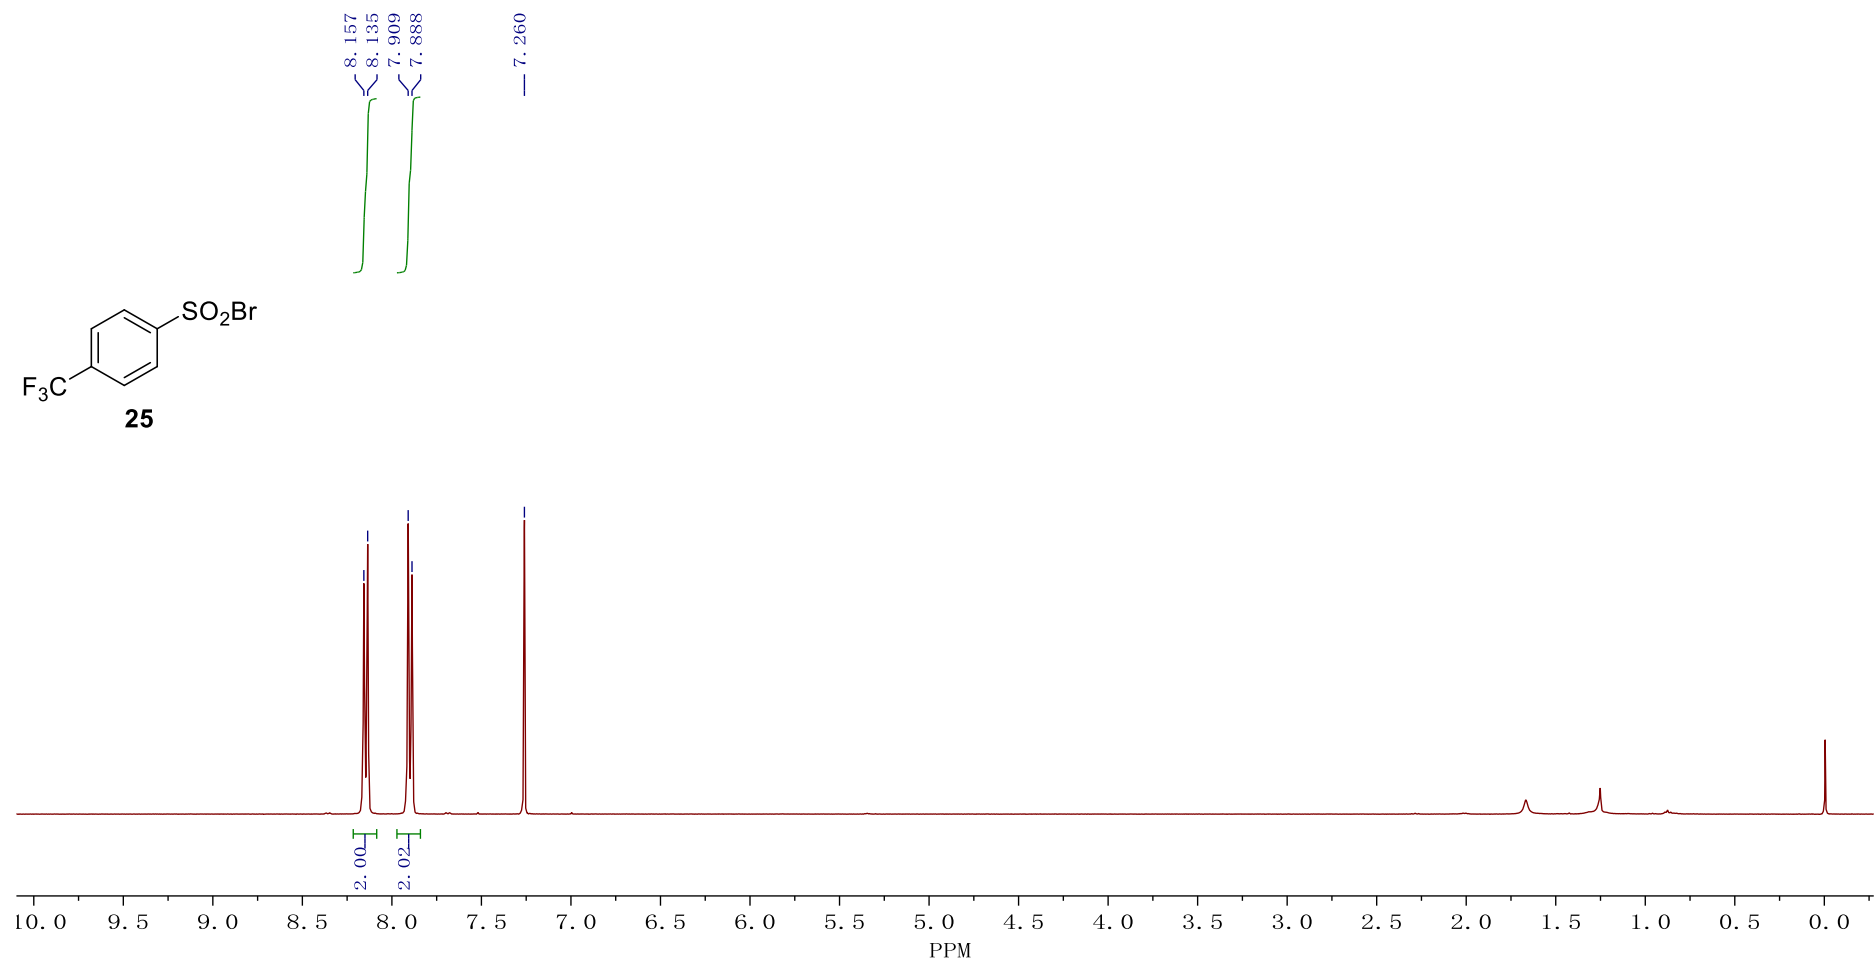



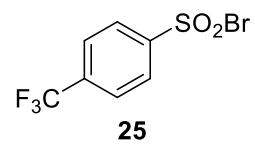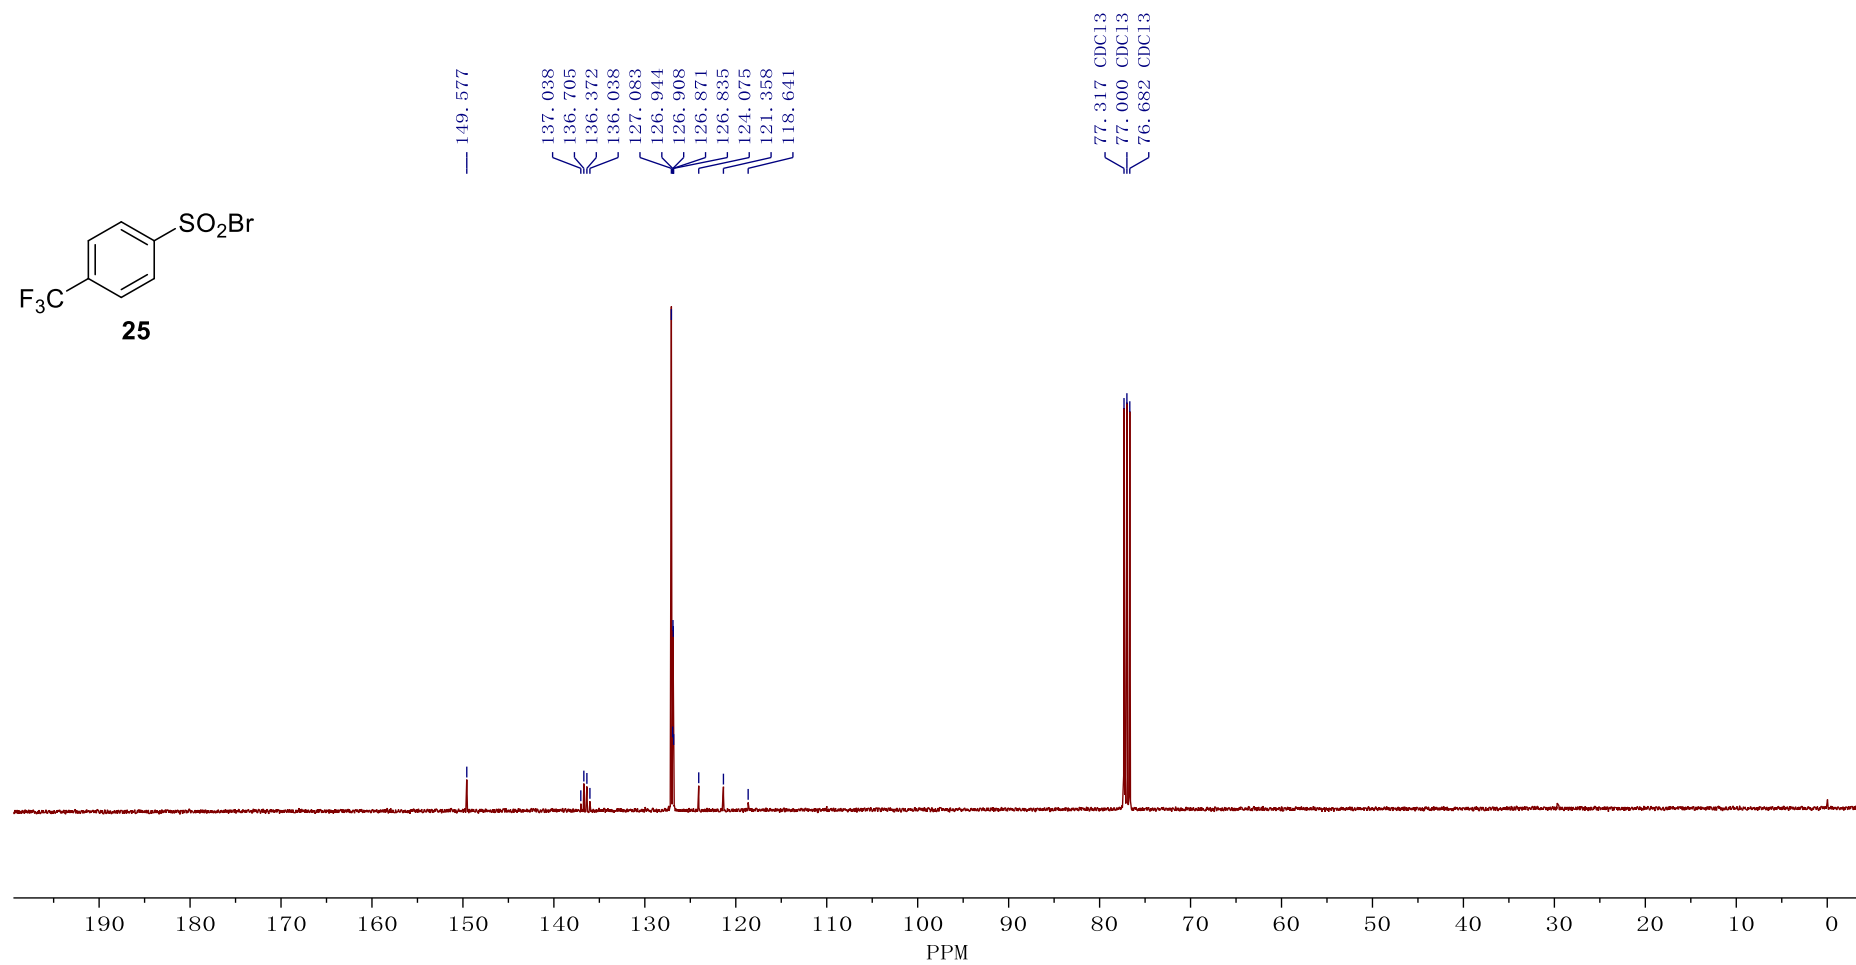

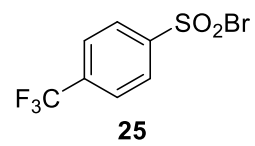

-63.346

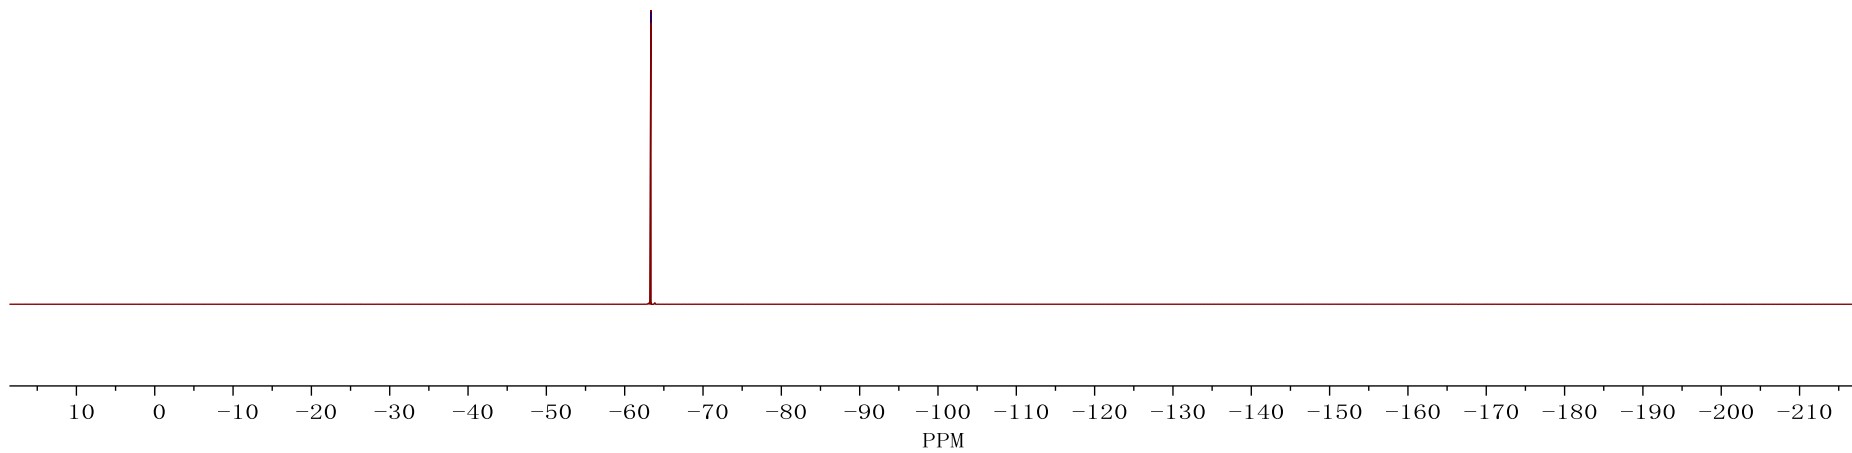

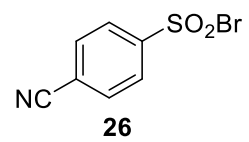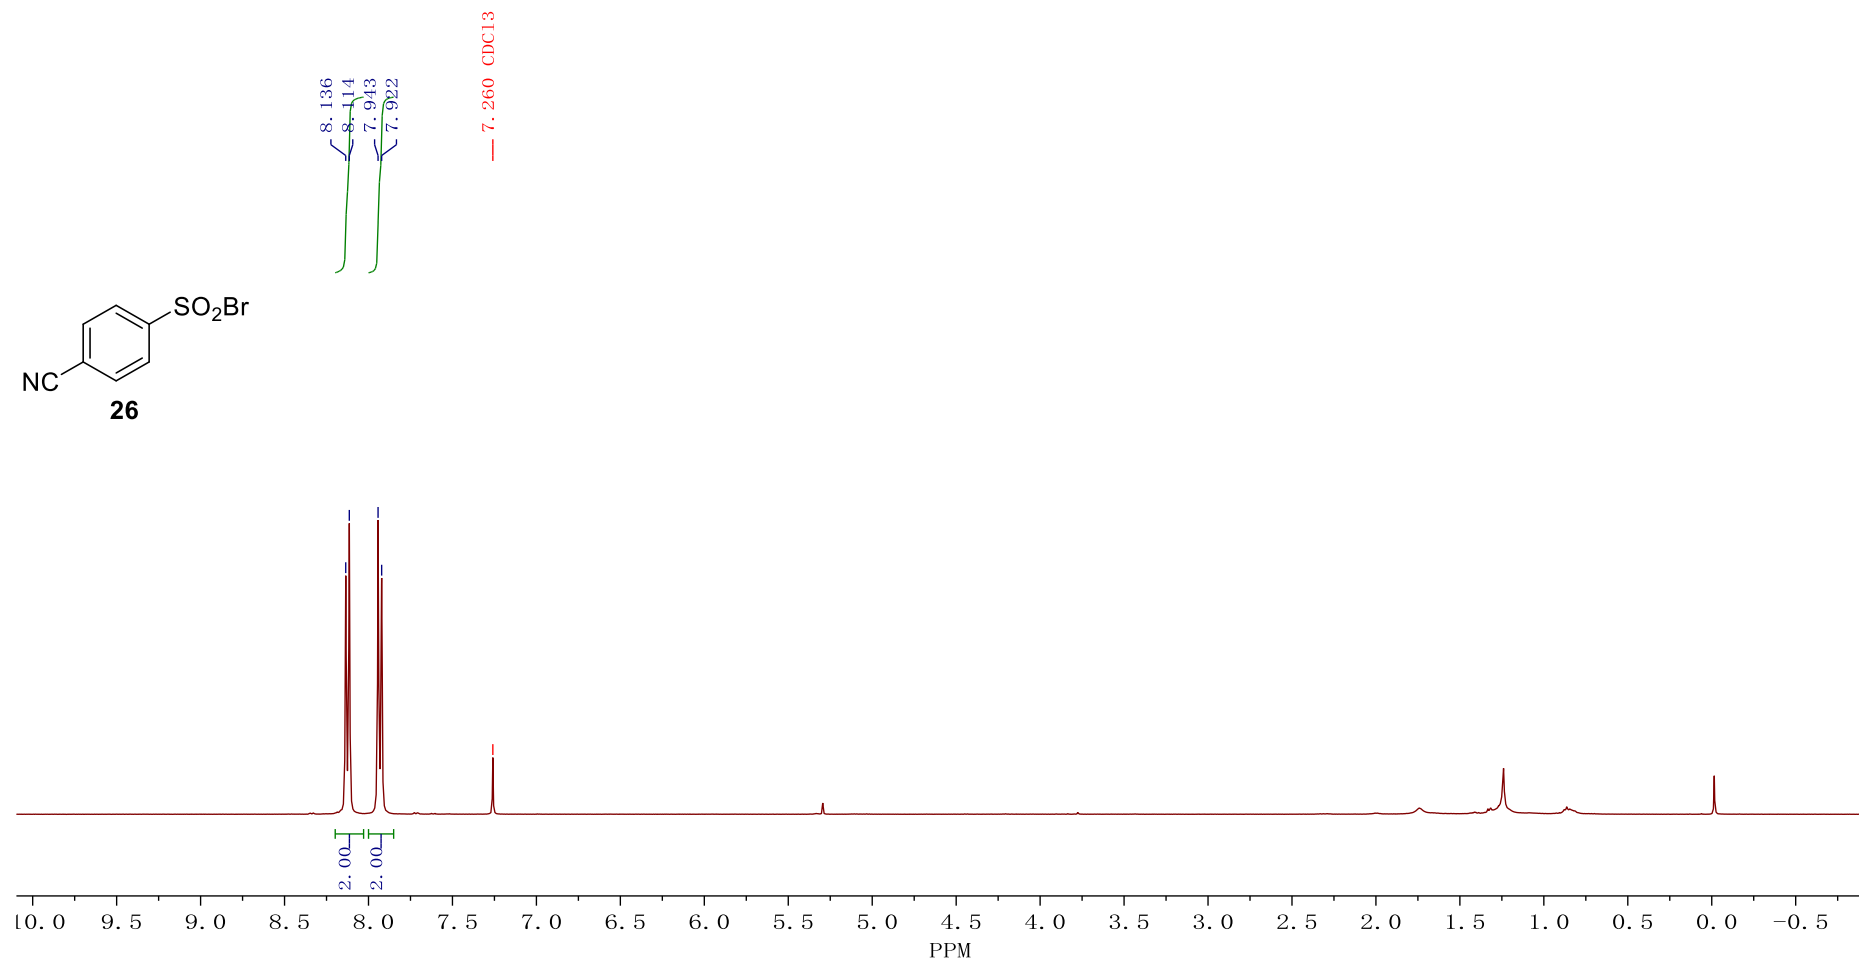

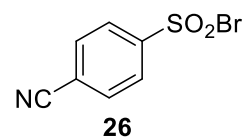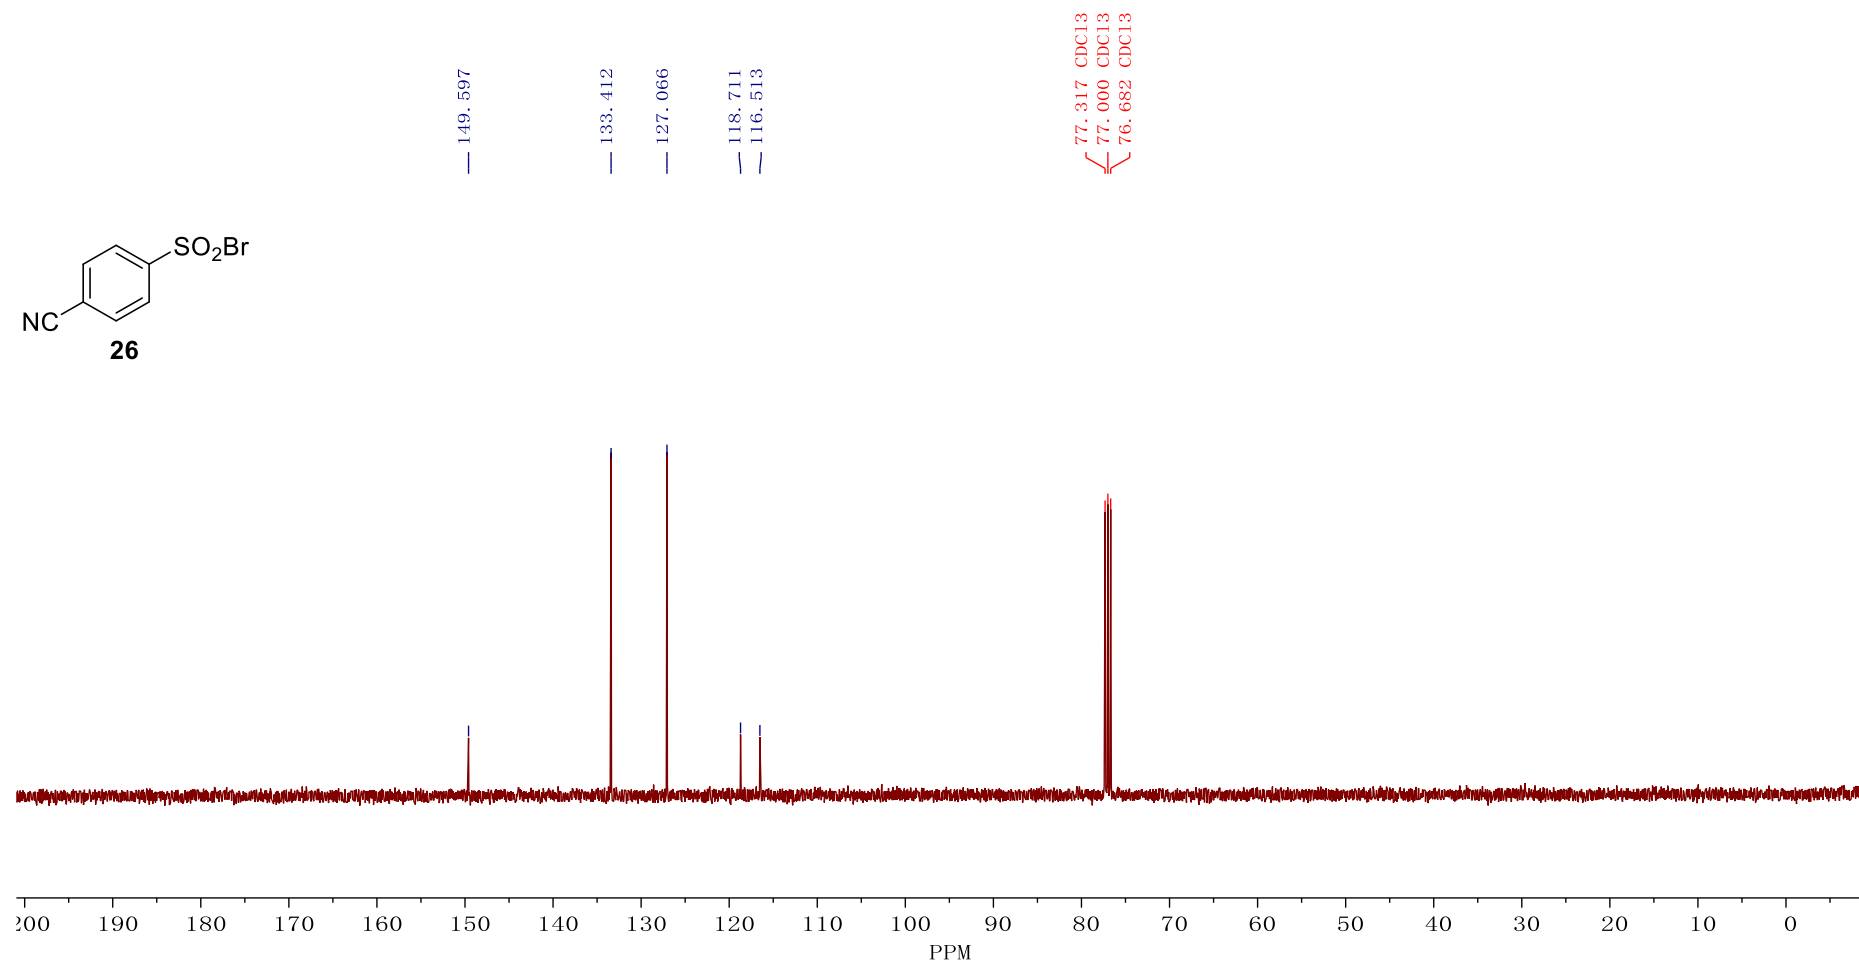

S100

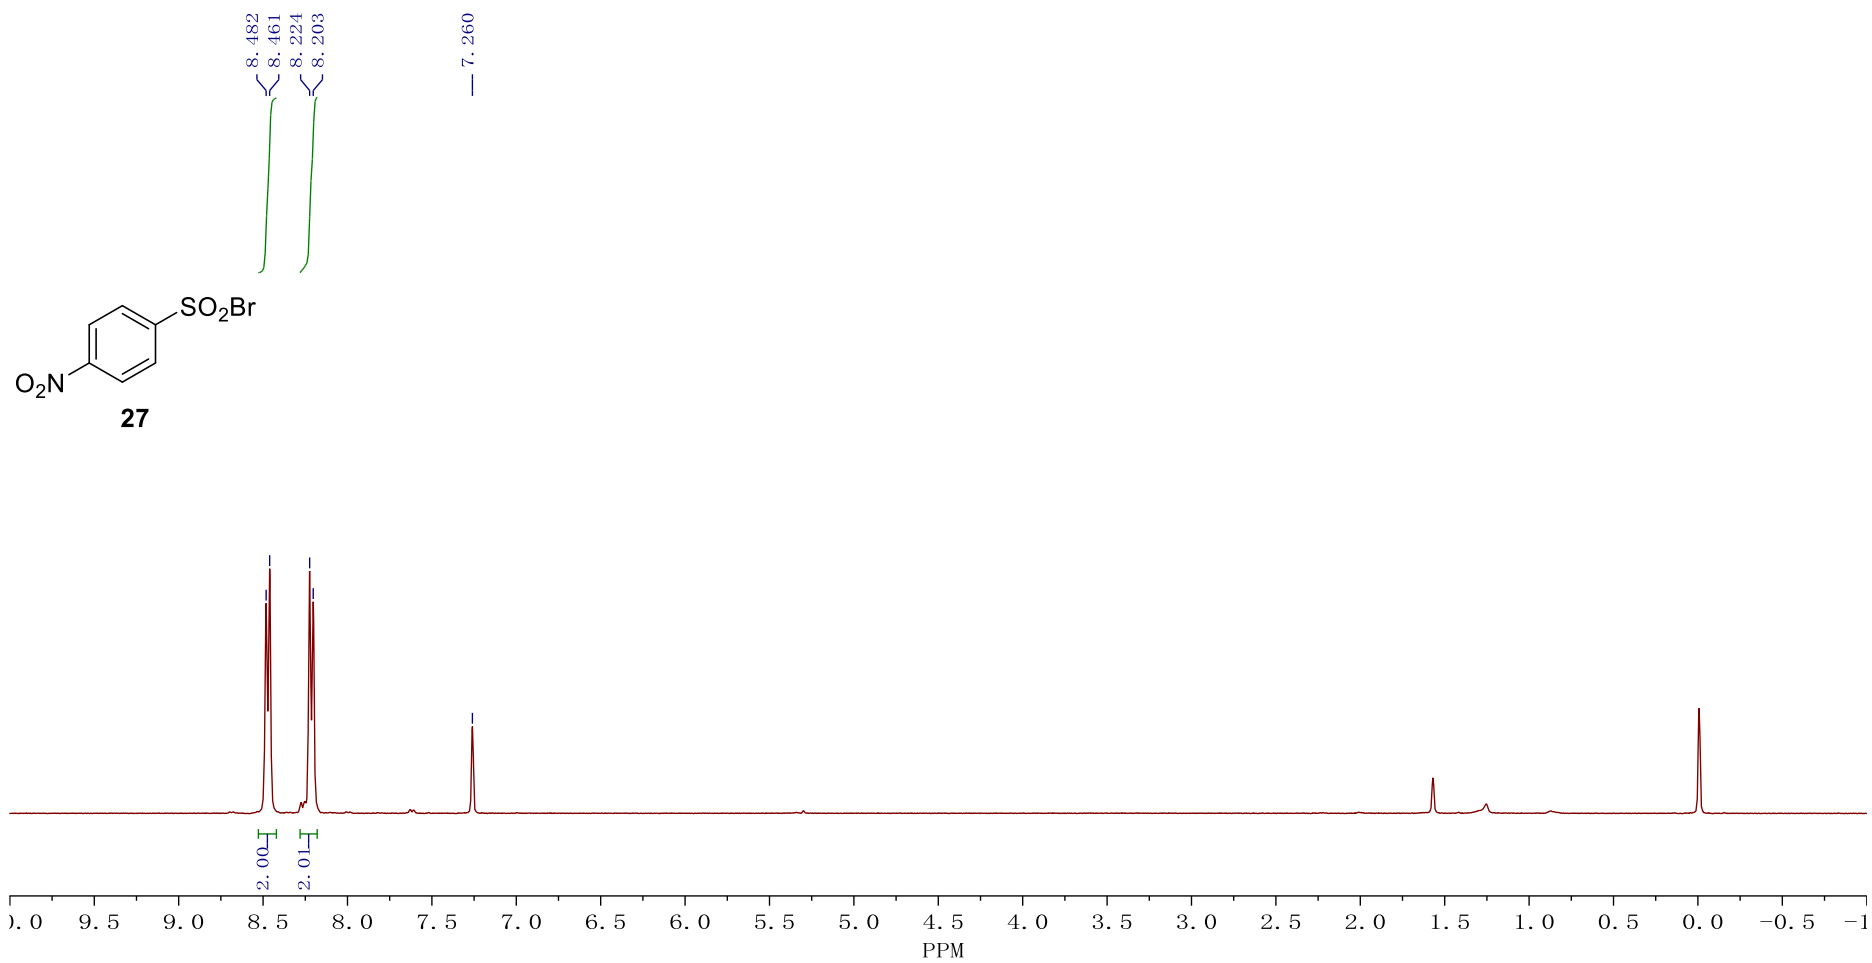

S101

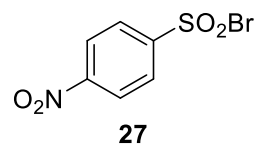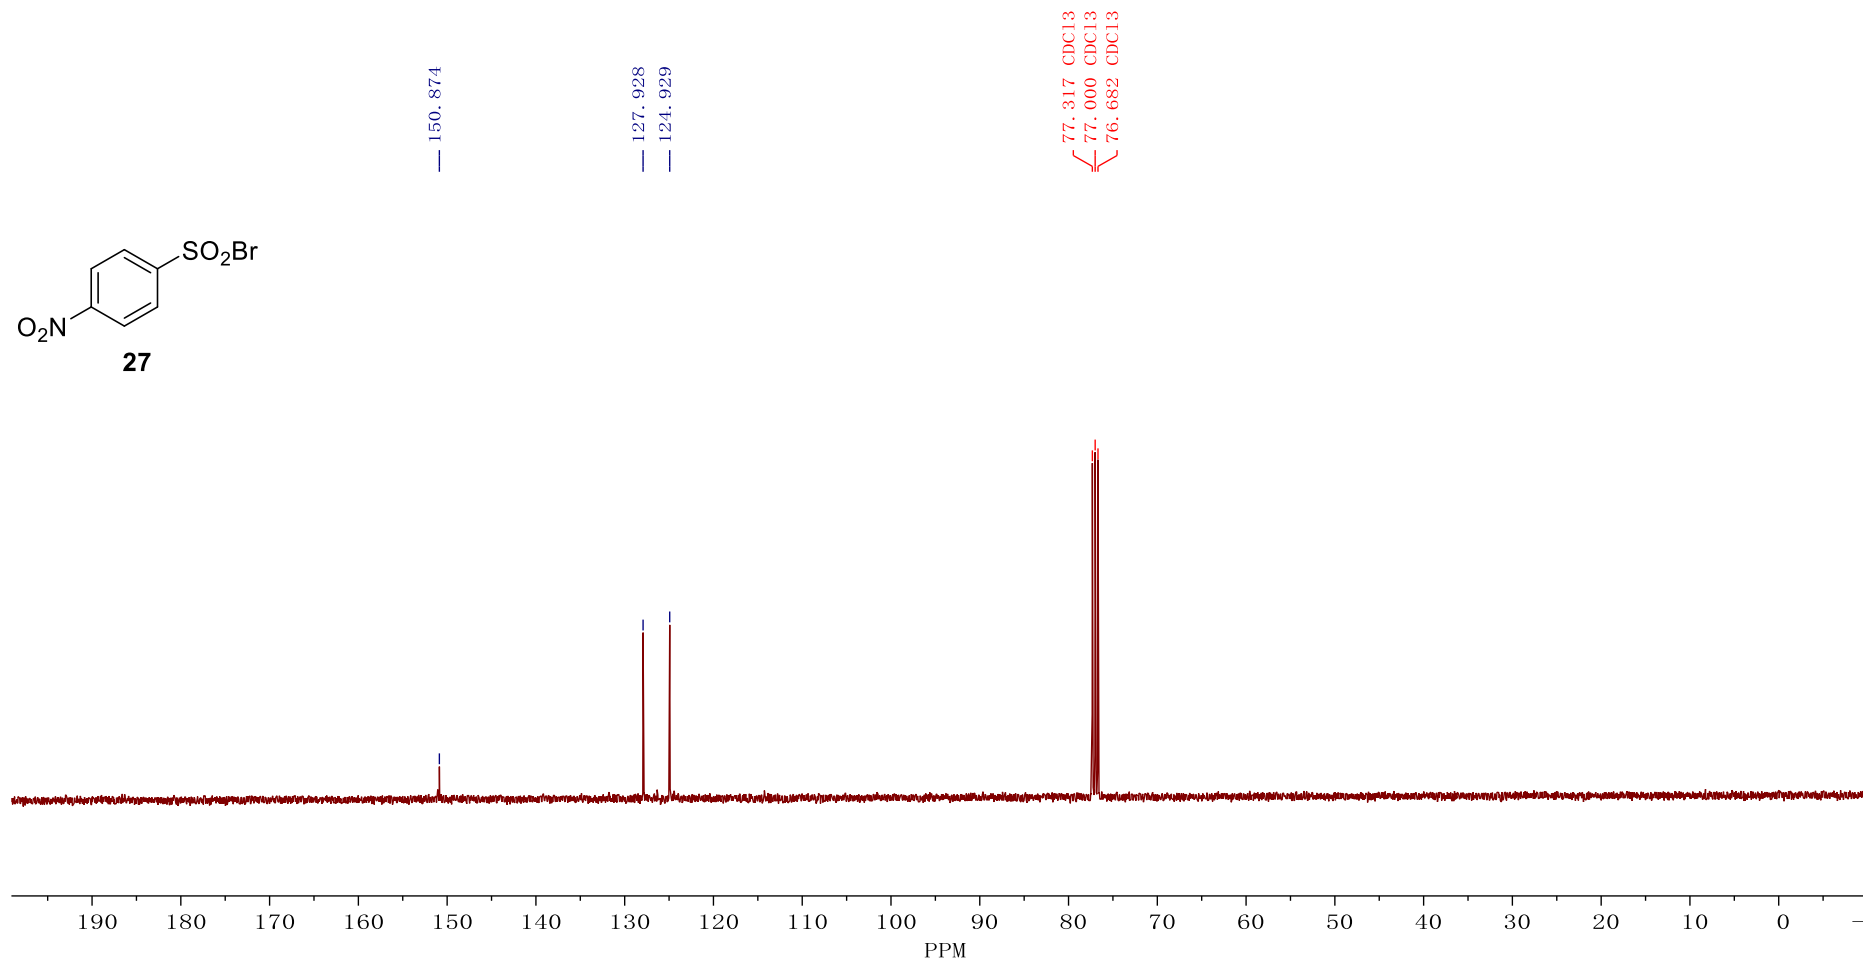

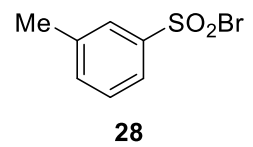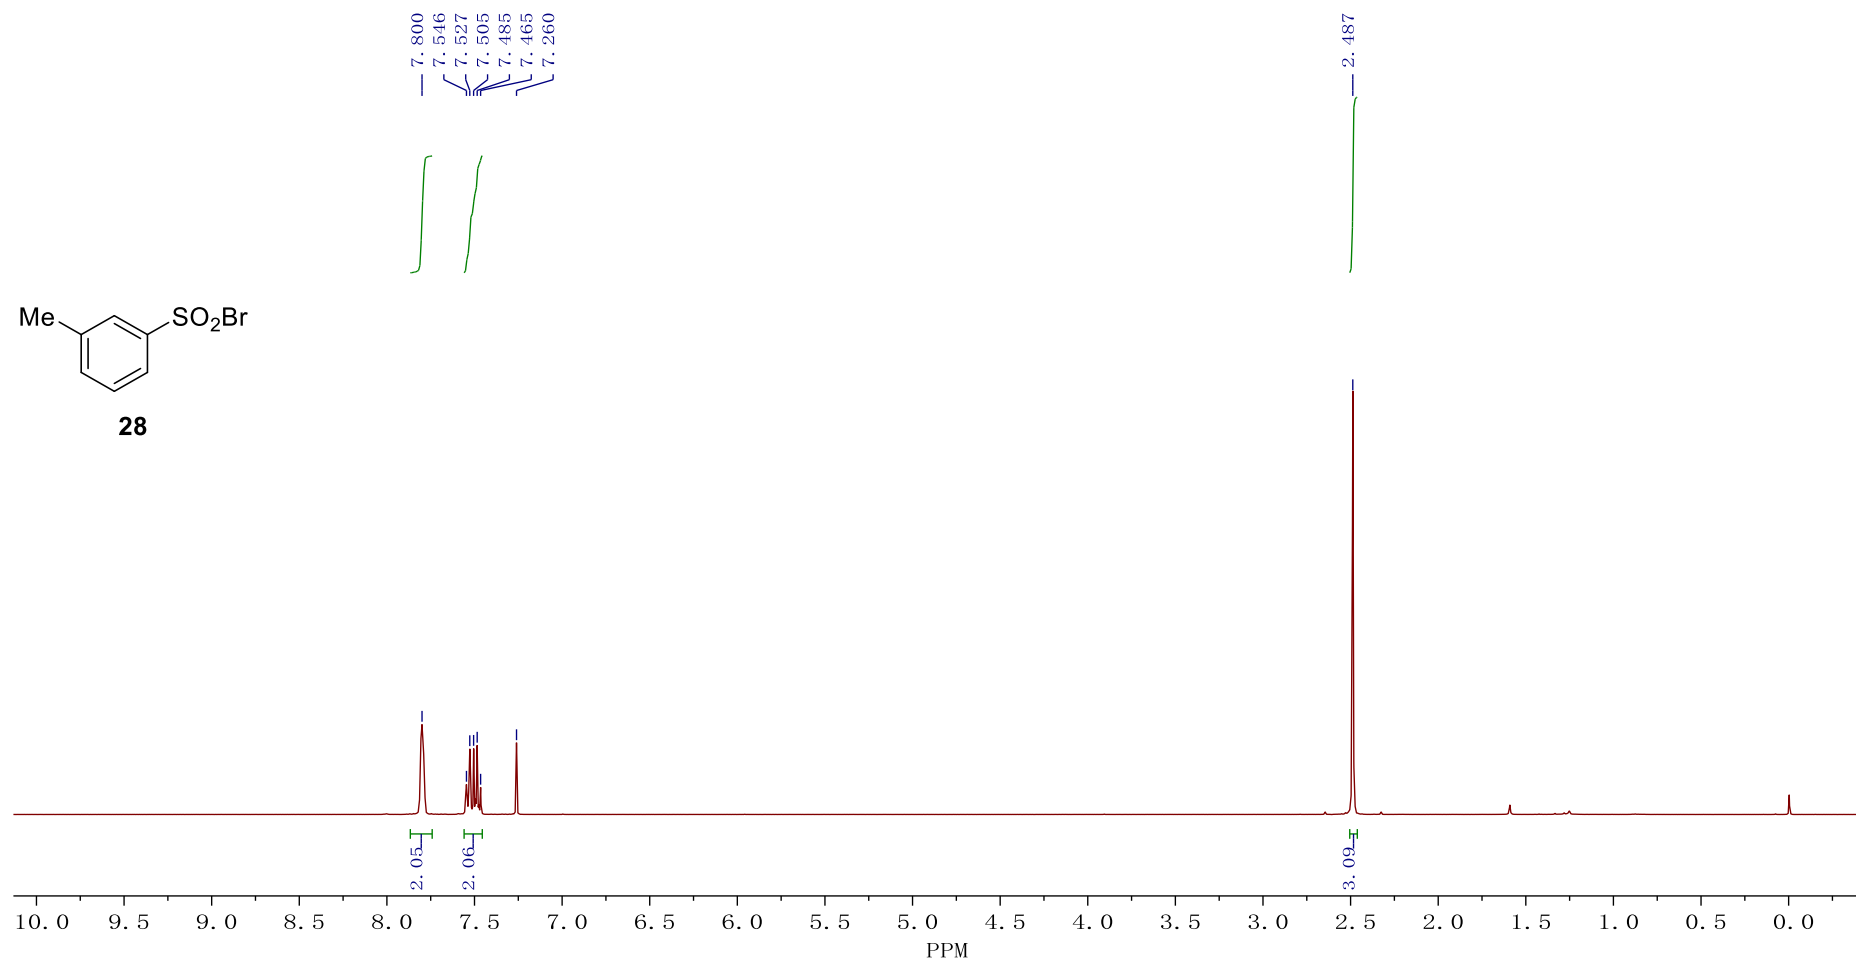

S103

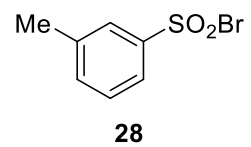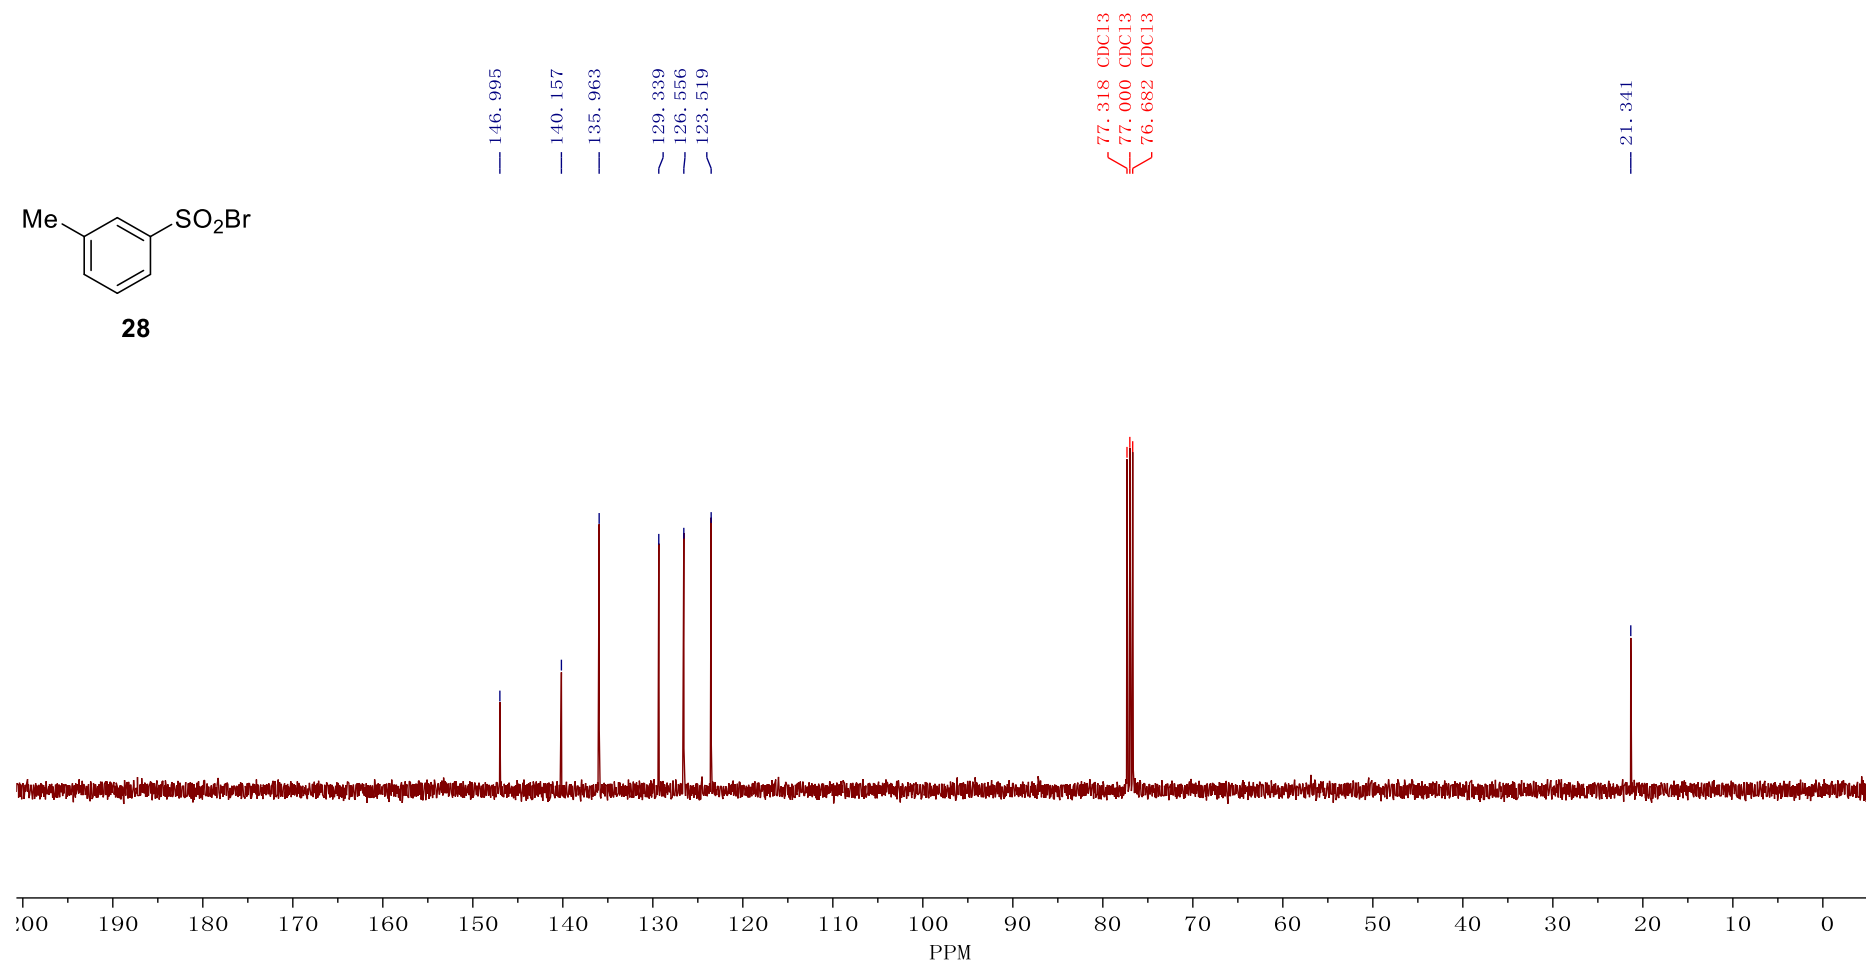

S104



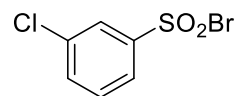

29

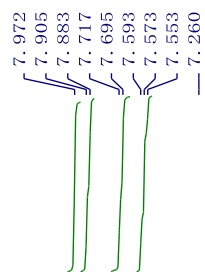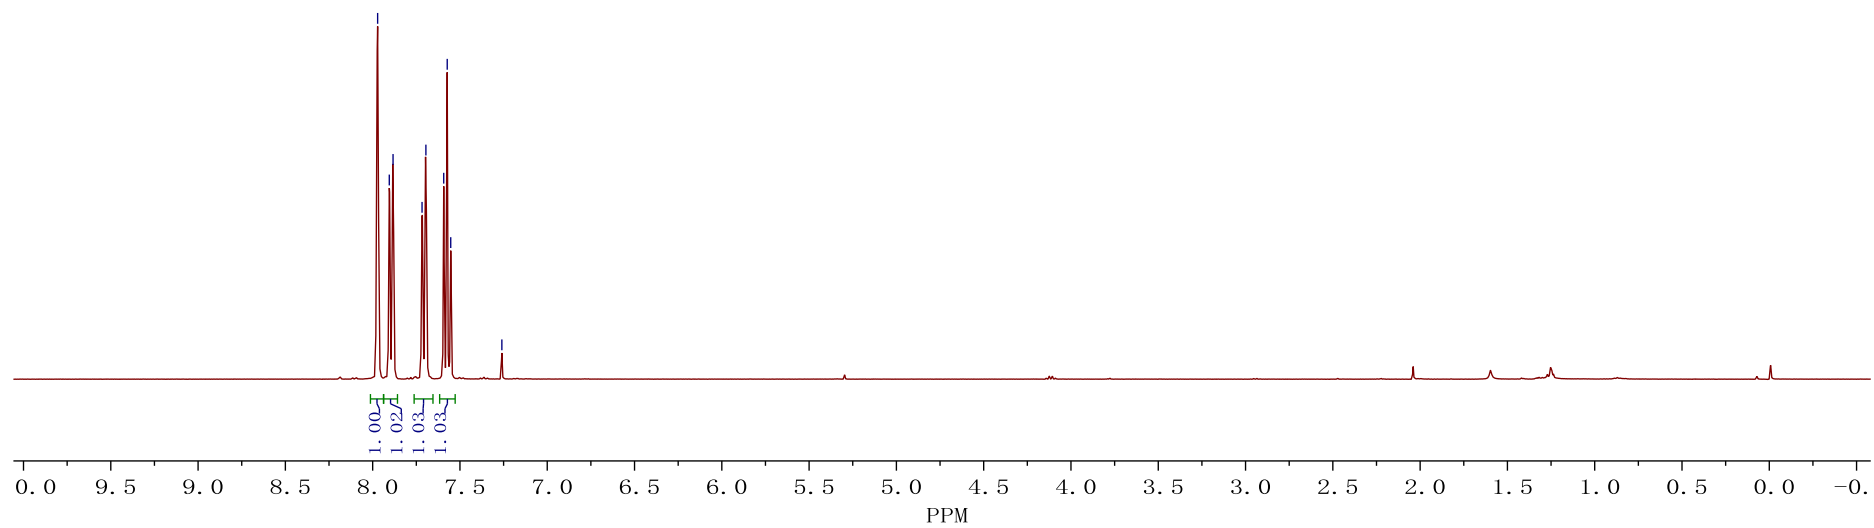

S105

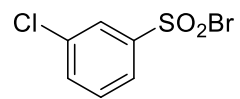

**29**

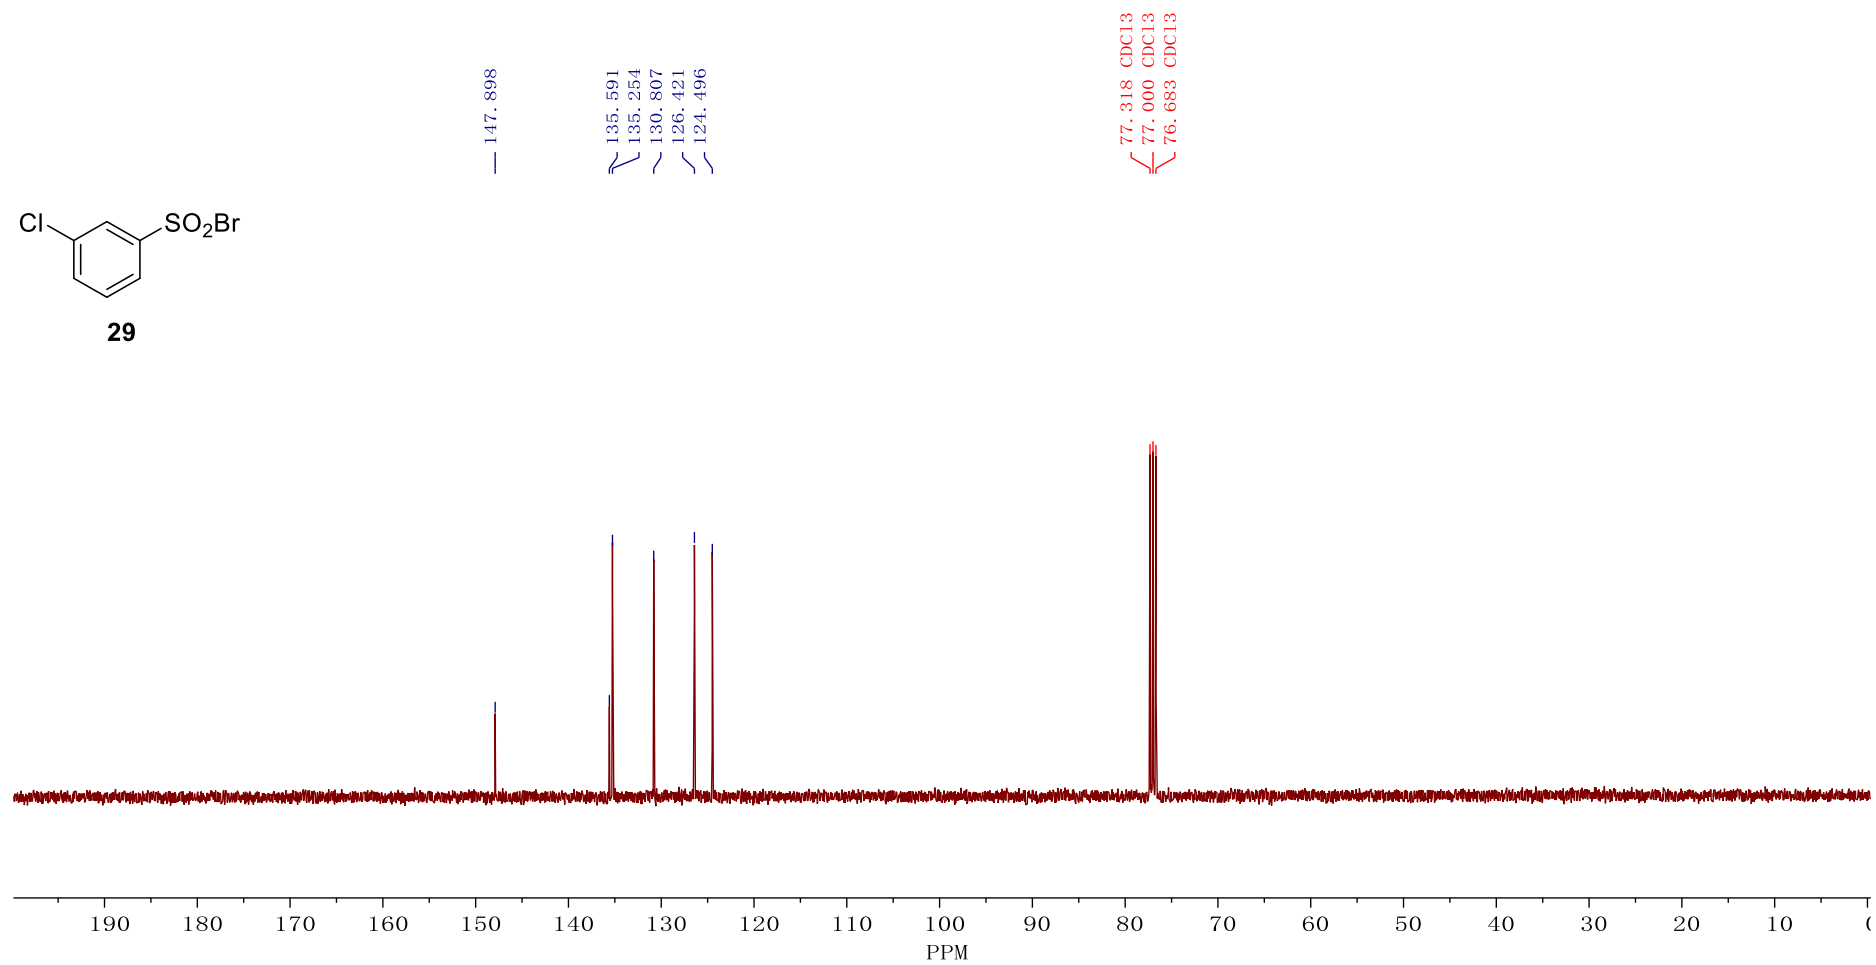

S106

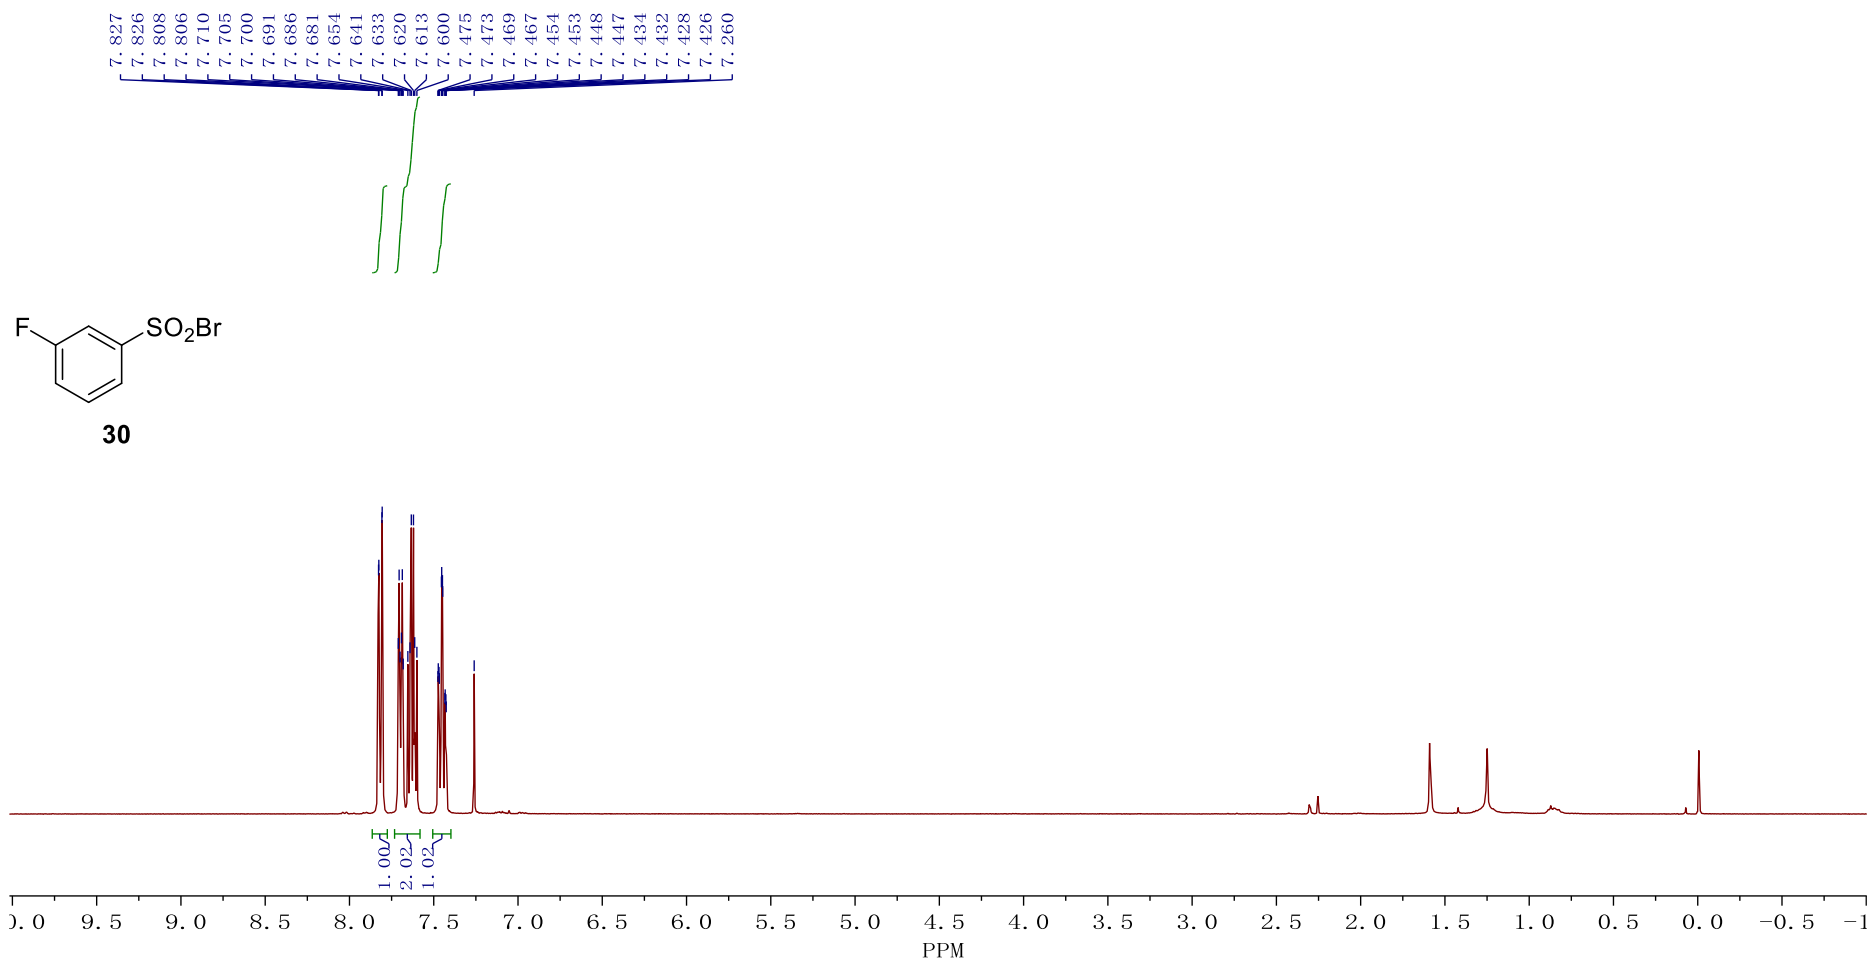

S107

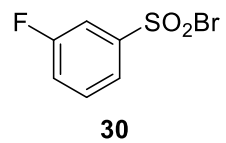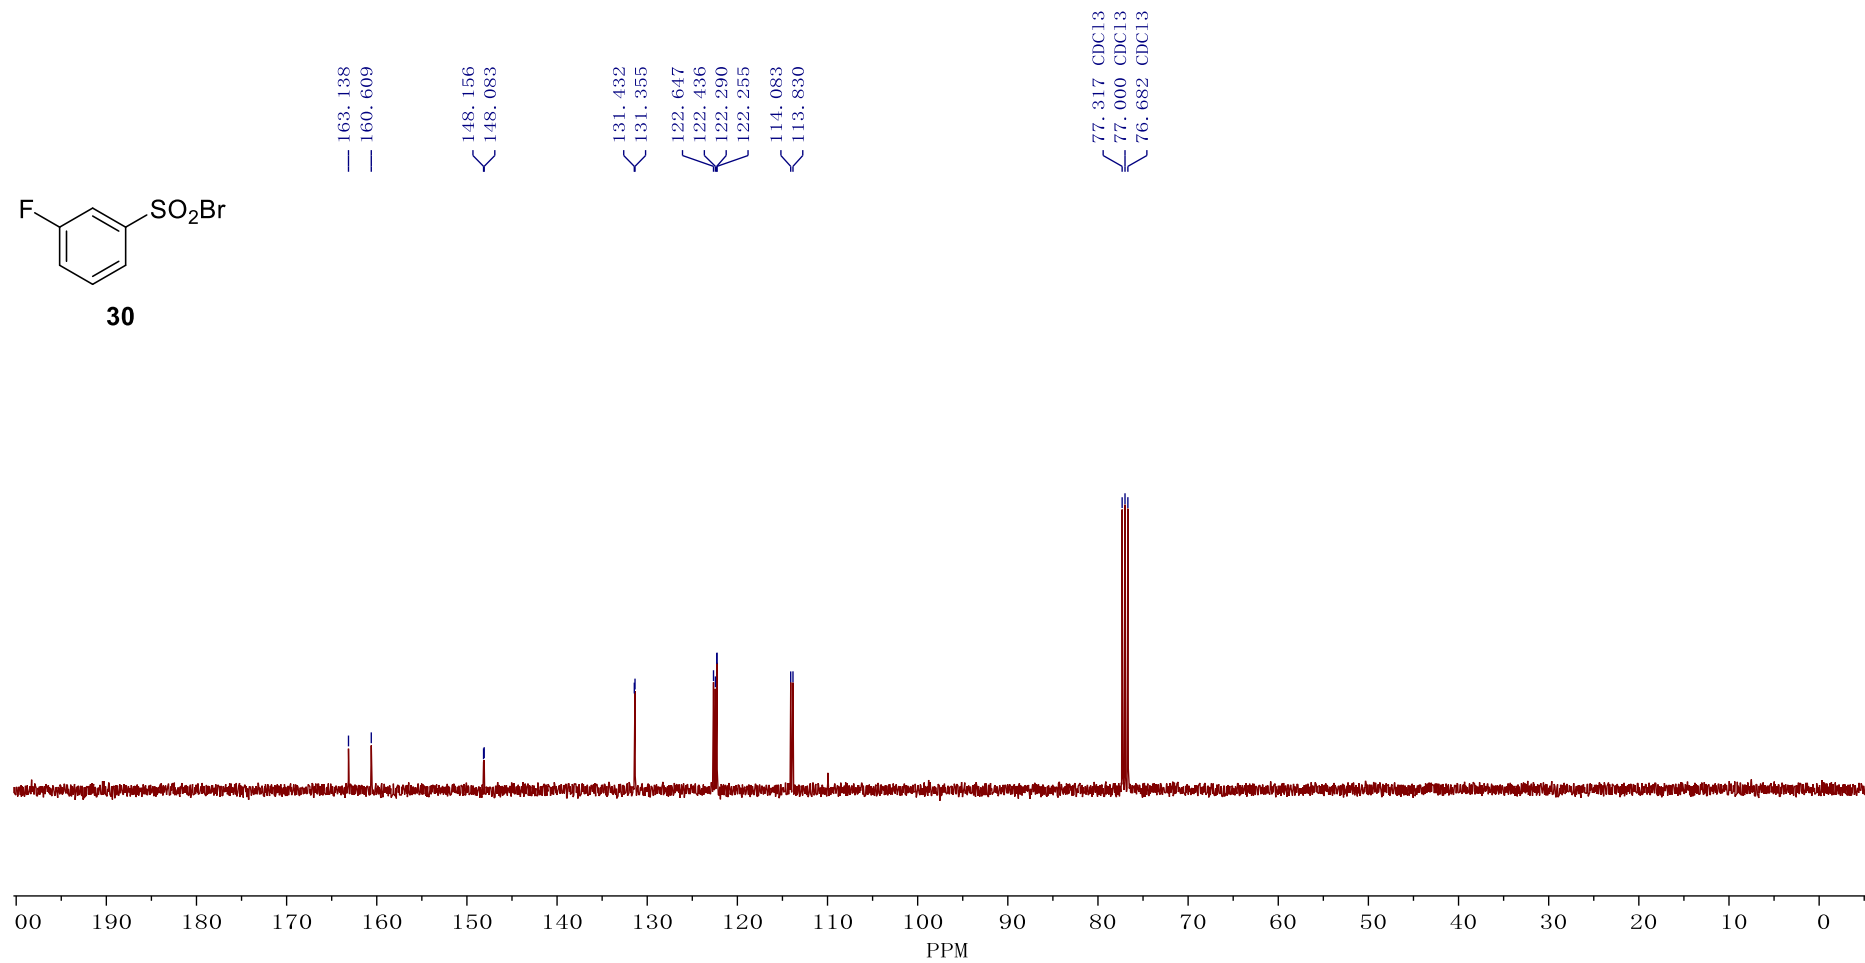

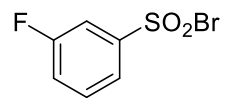

**30**

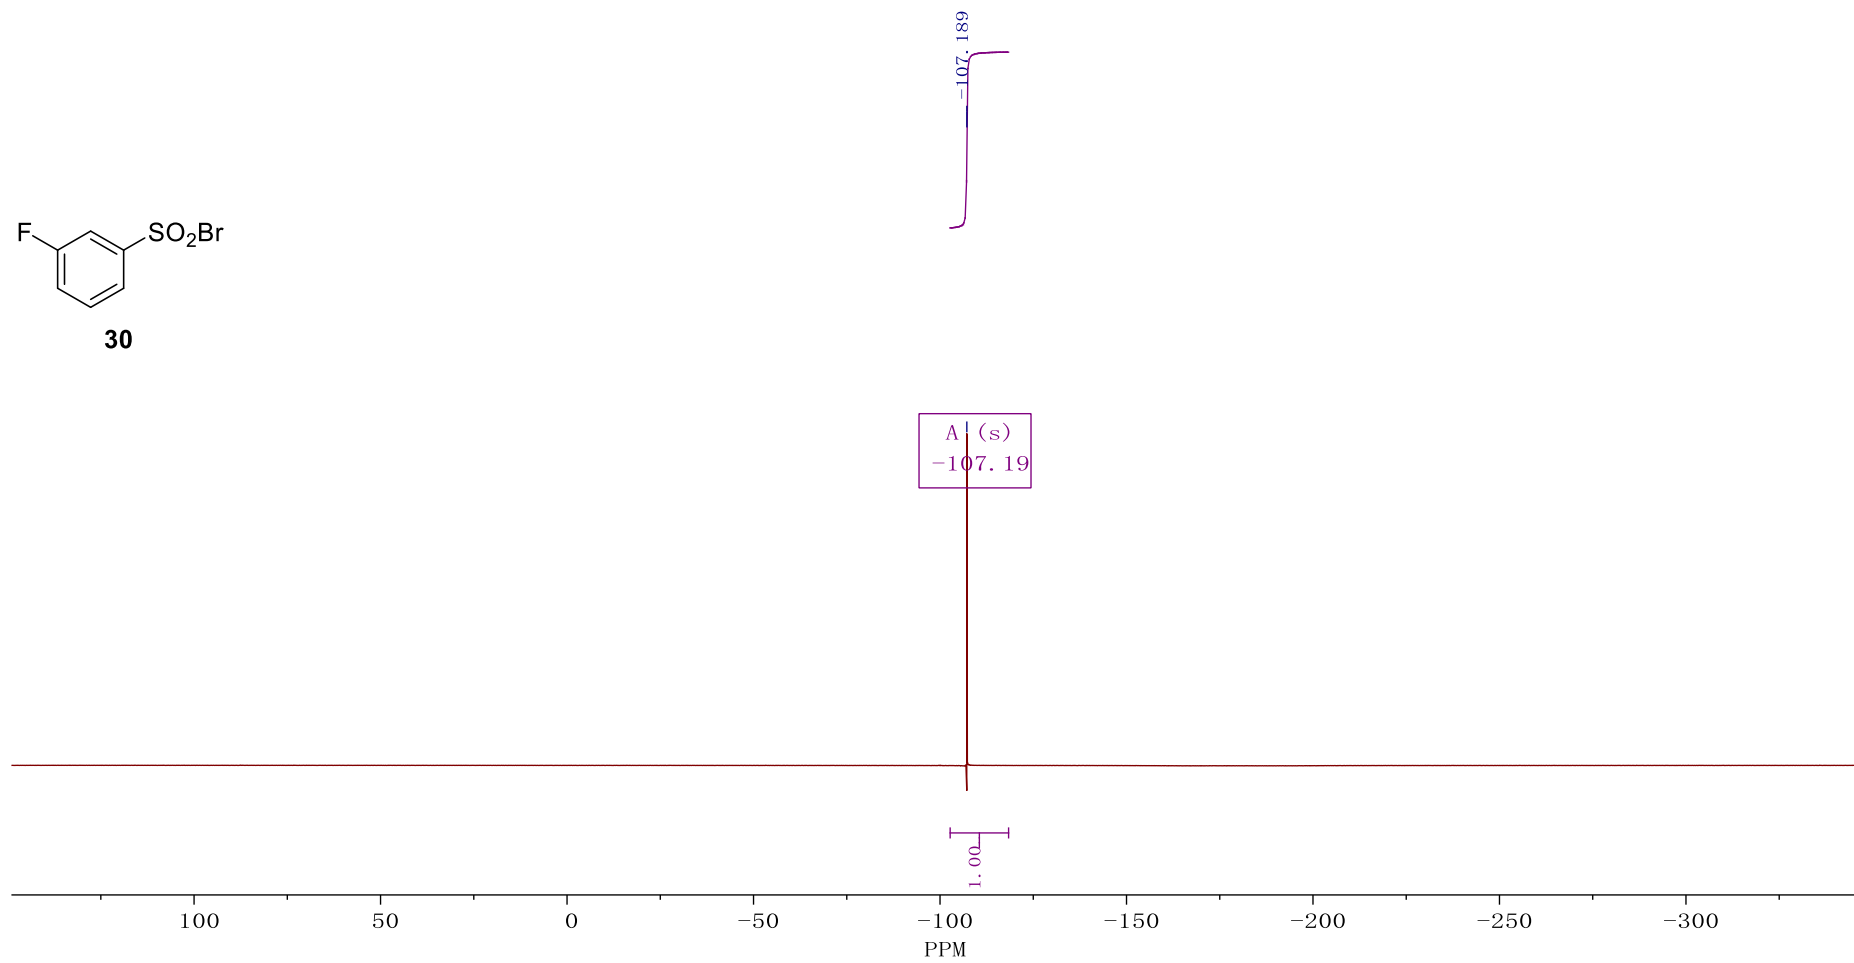

S109

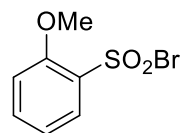

31

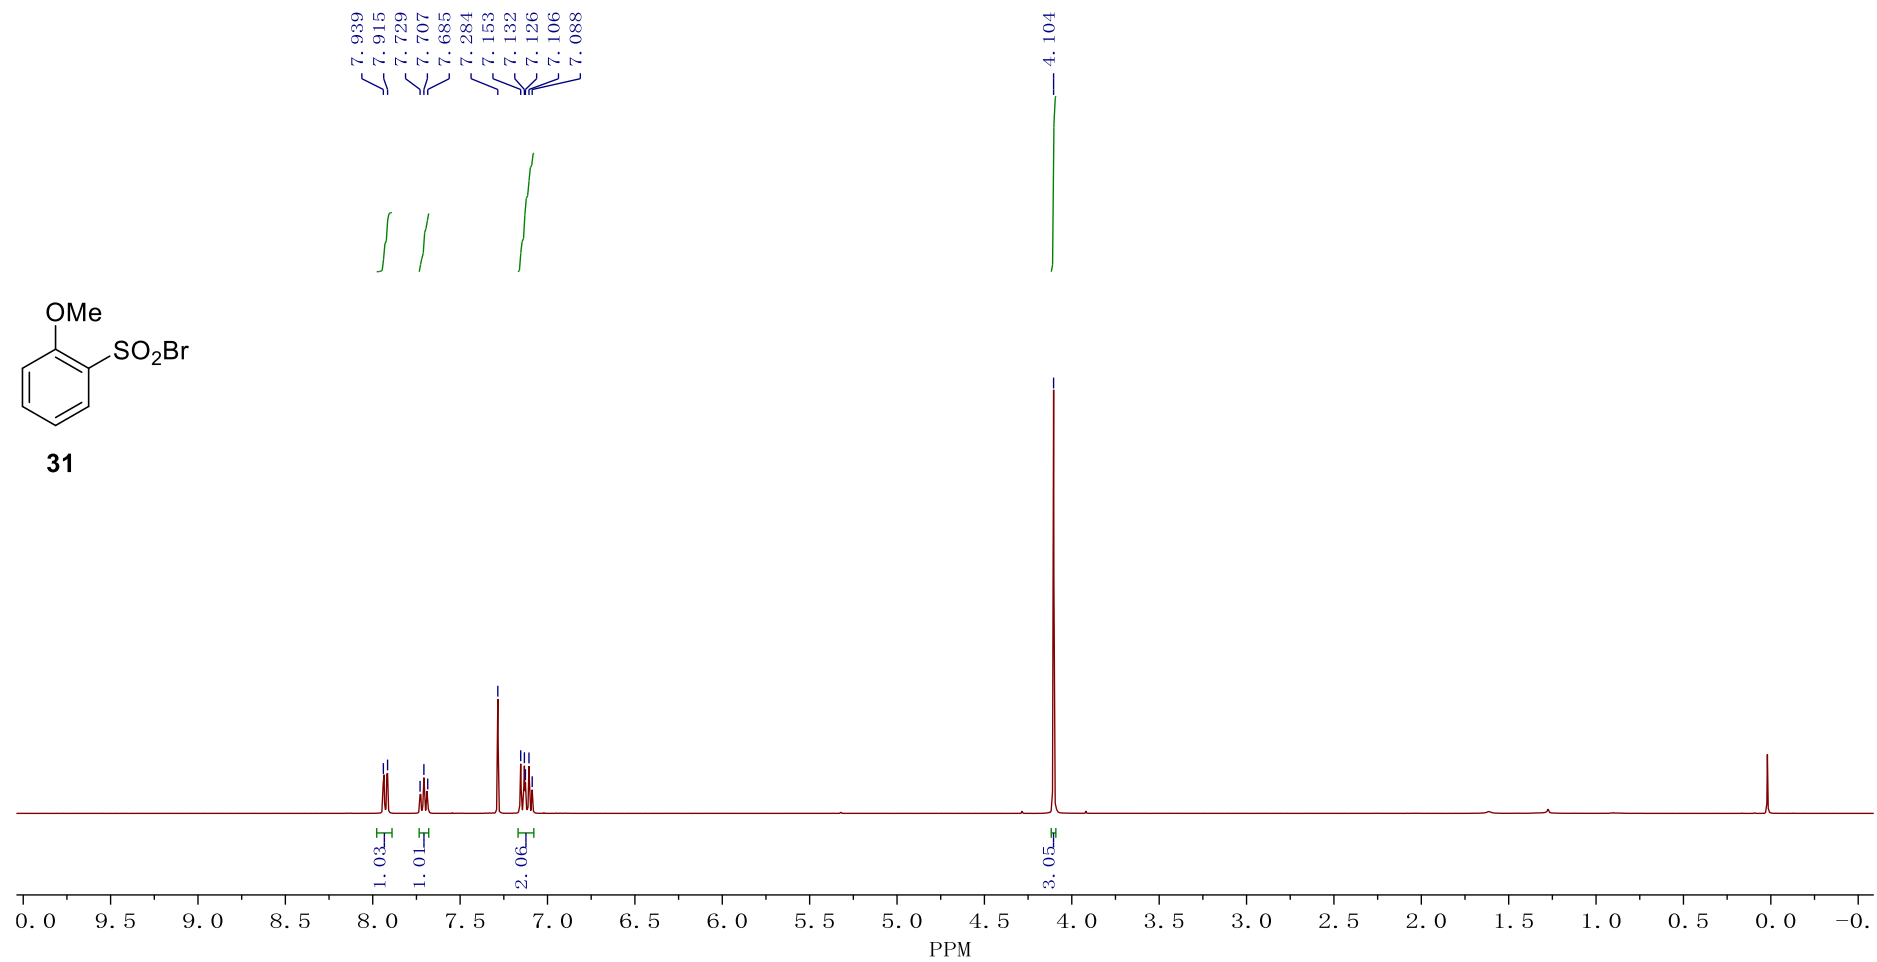

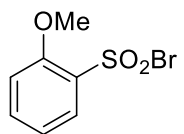

**31**

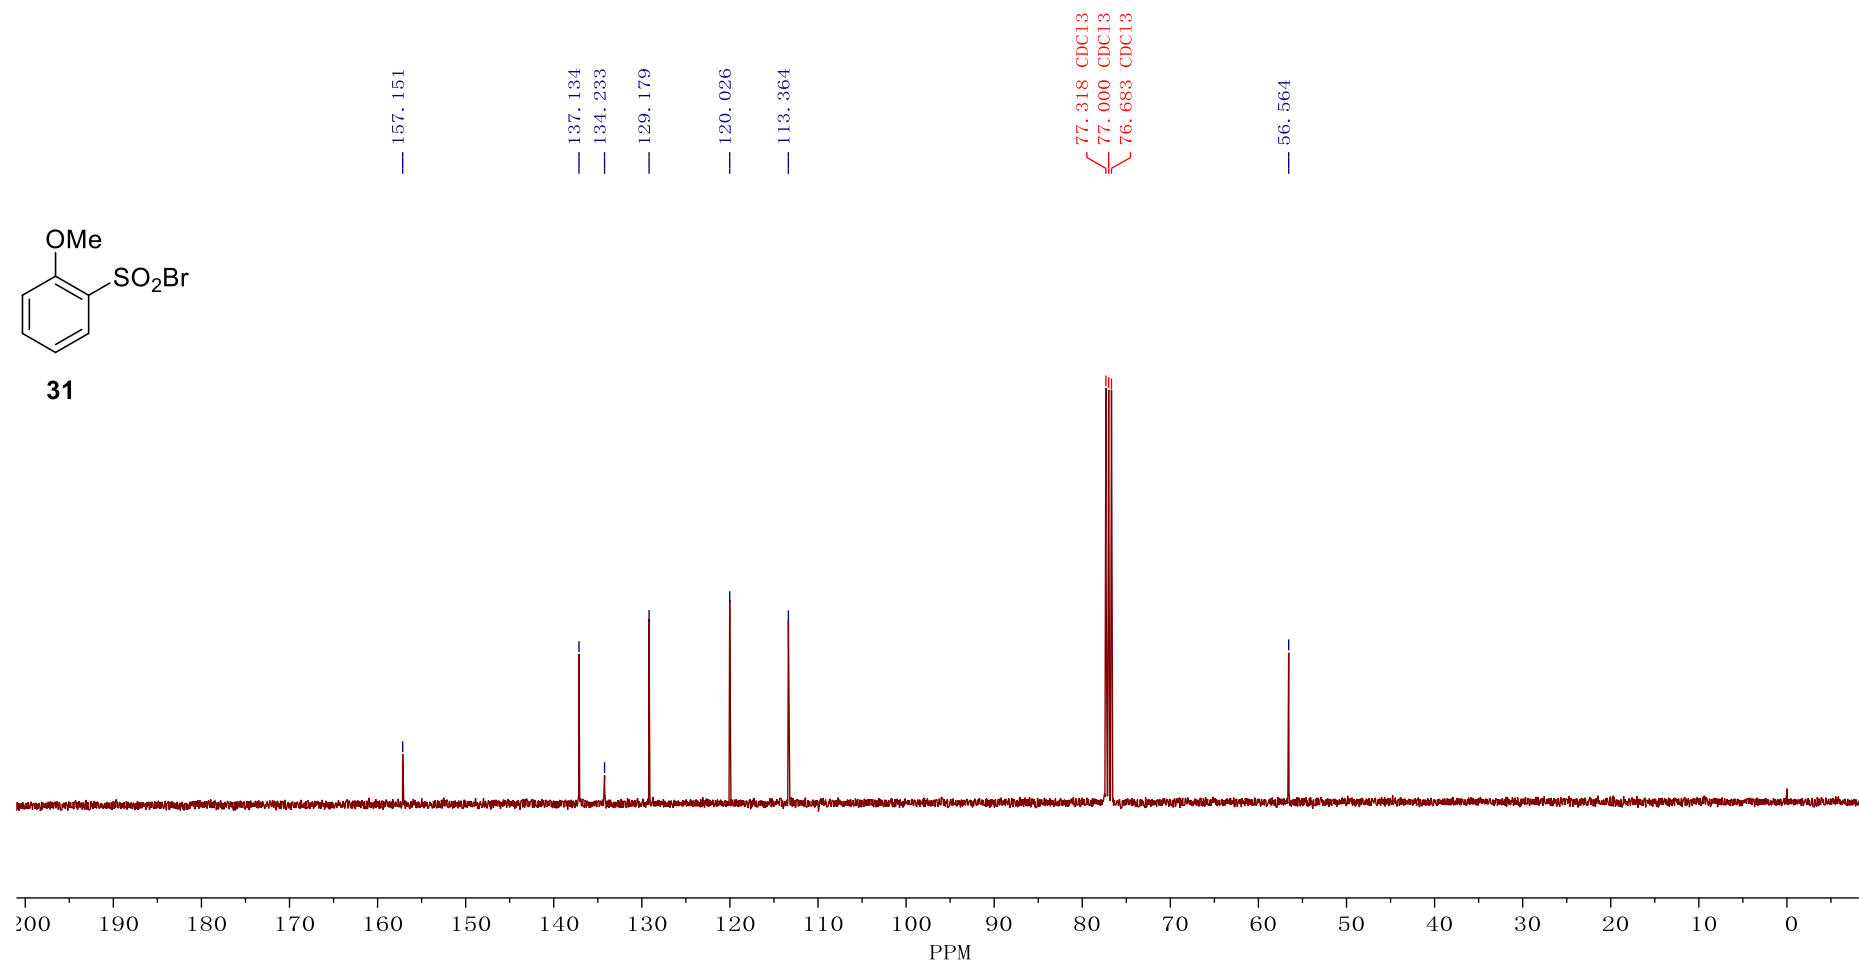

S111

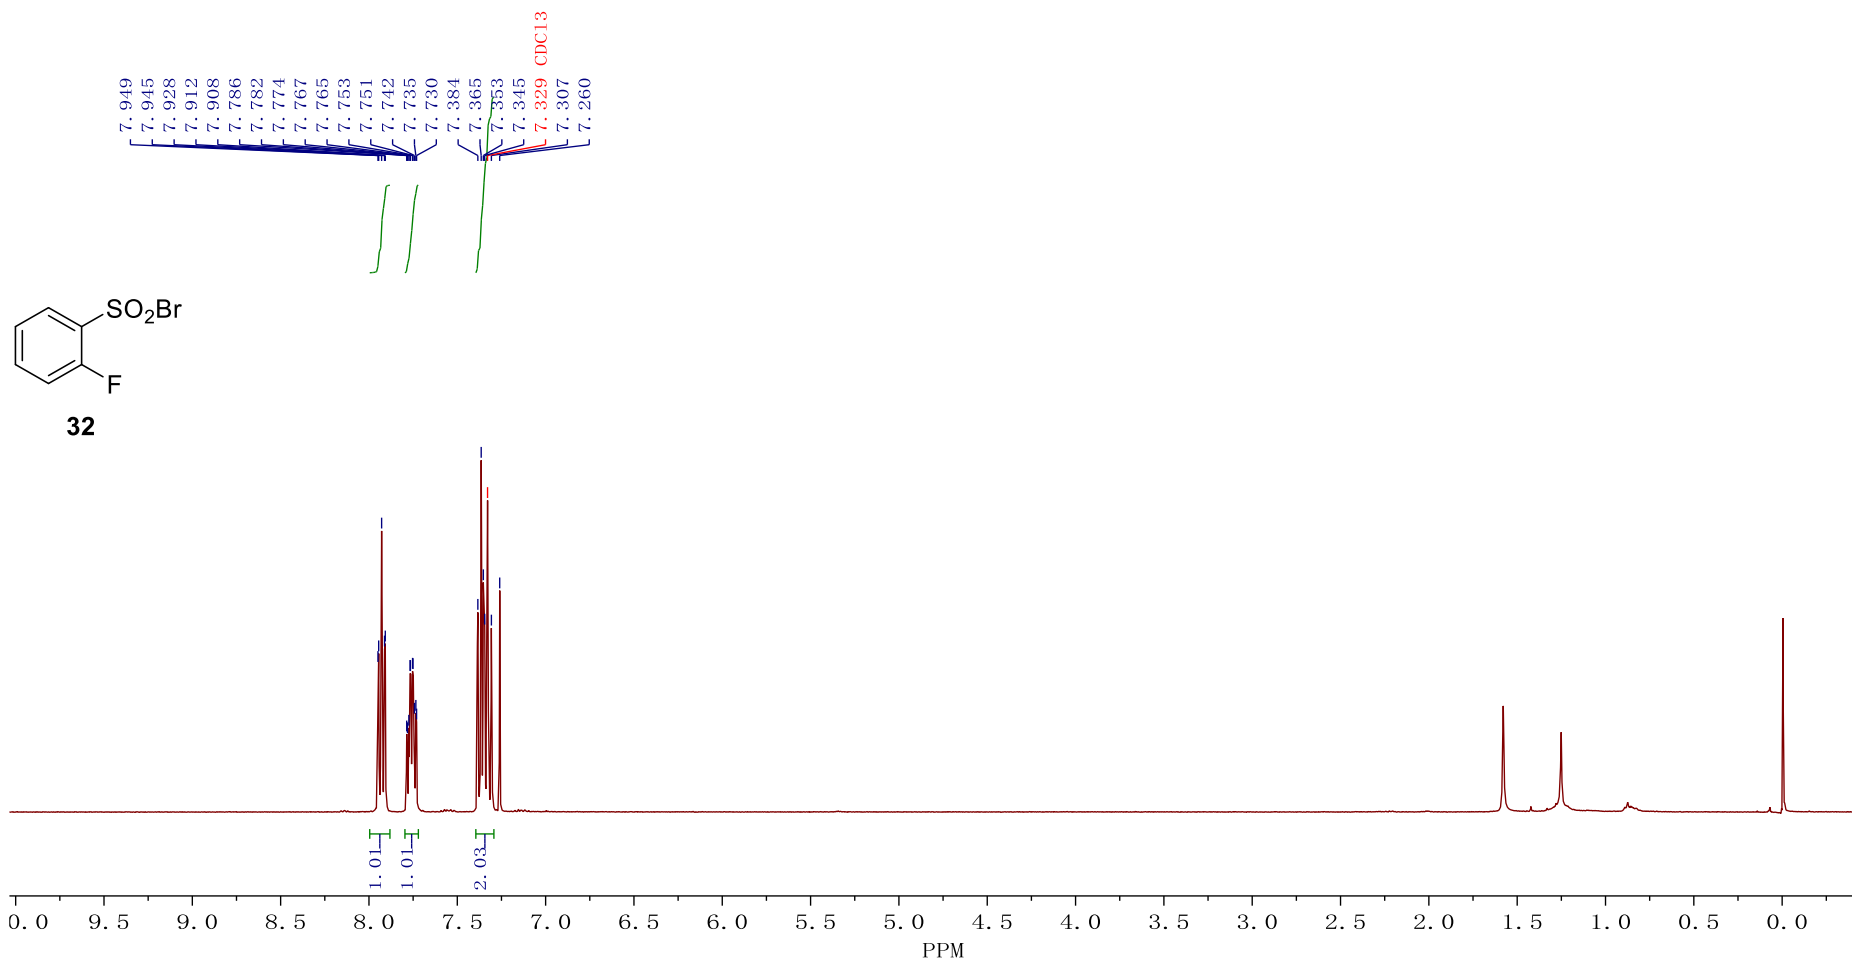



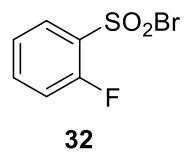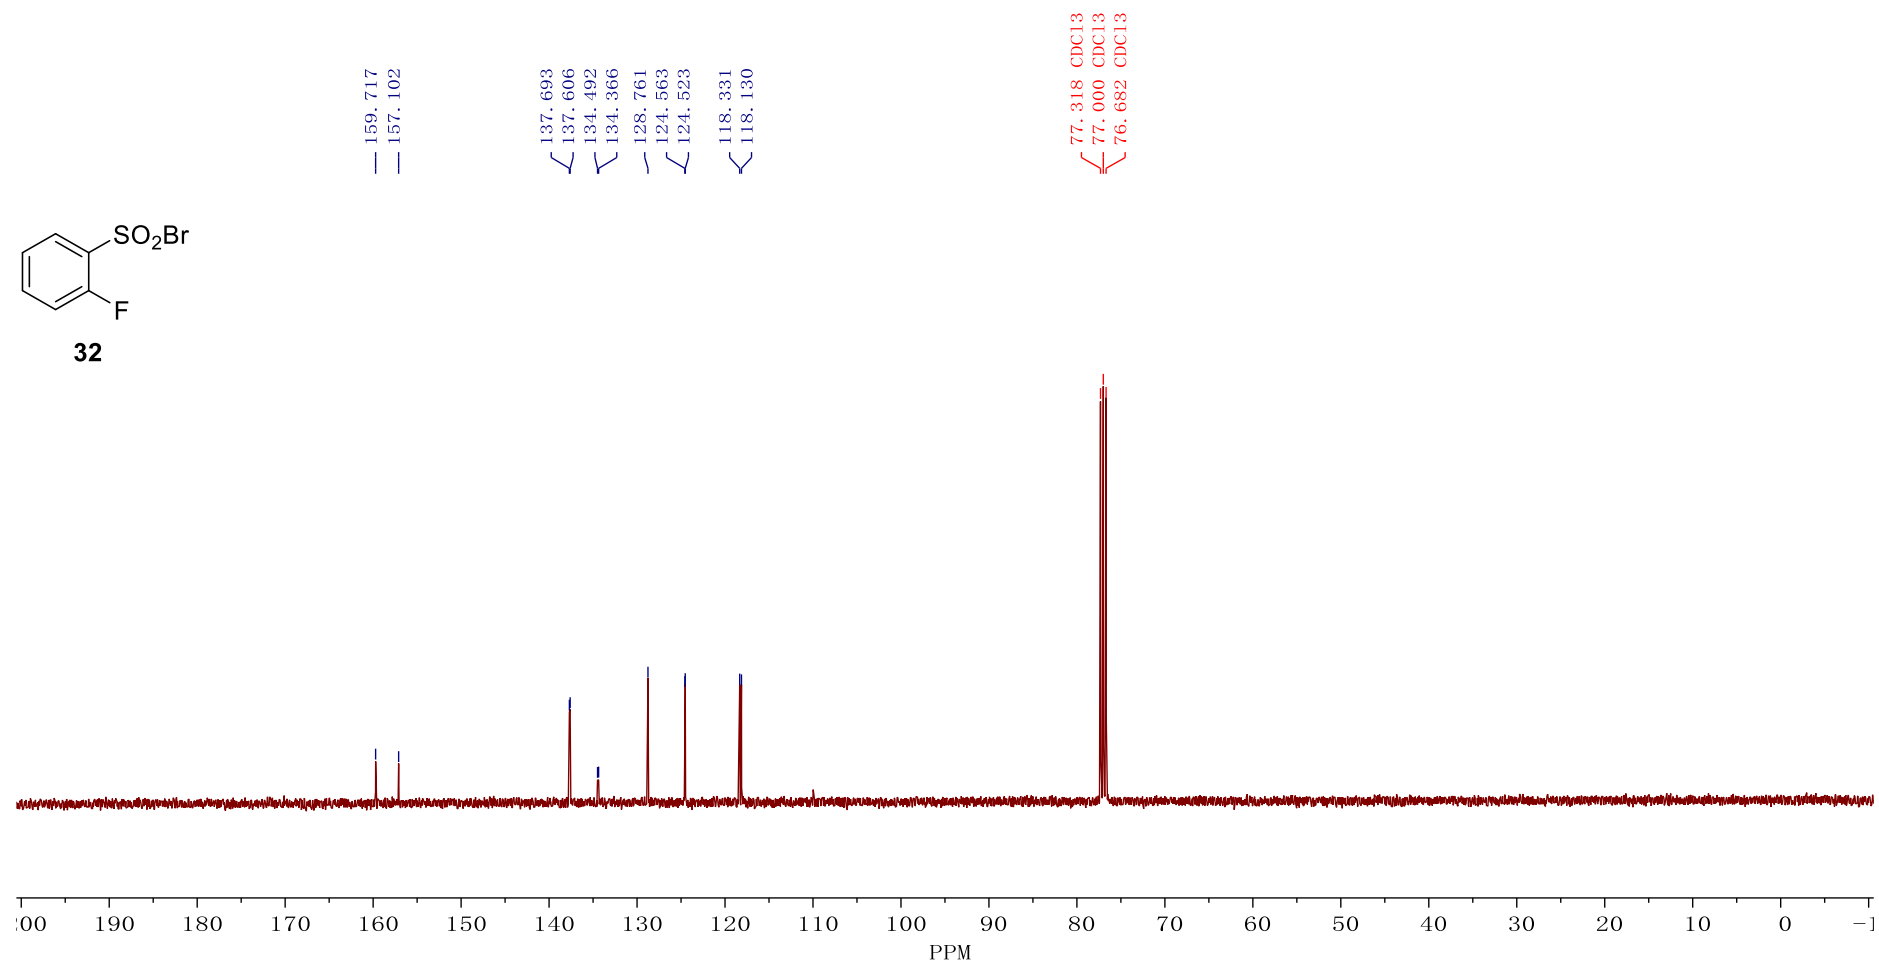

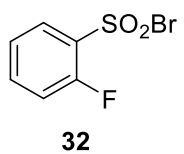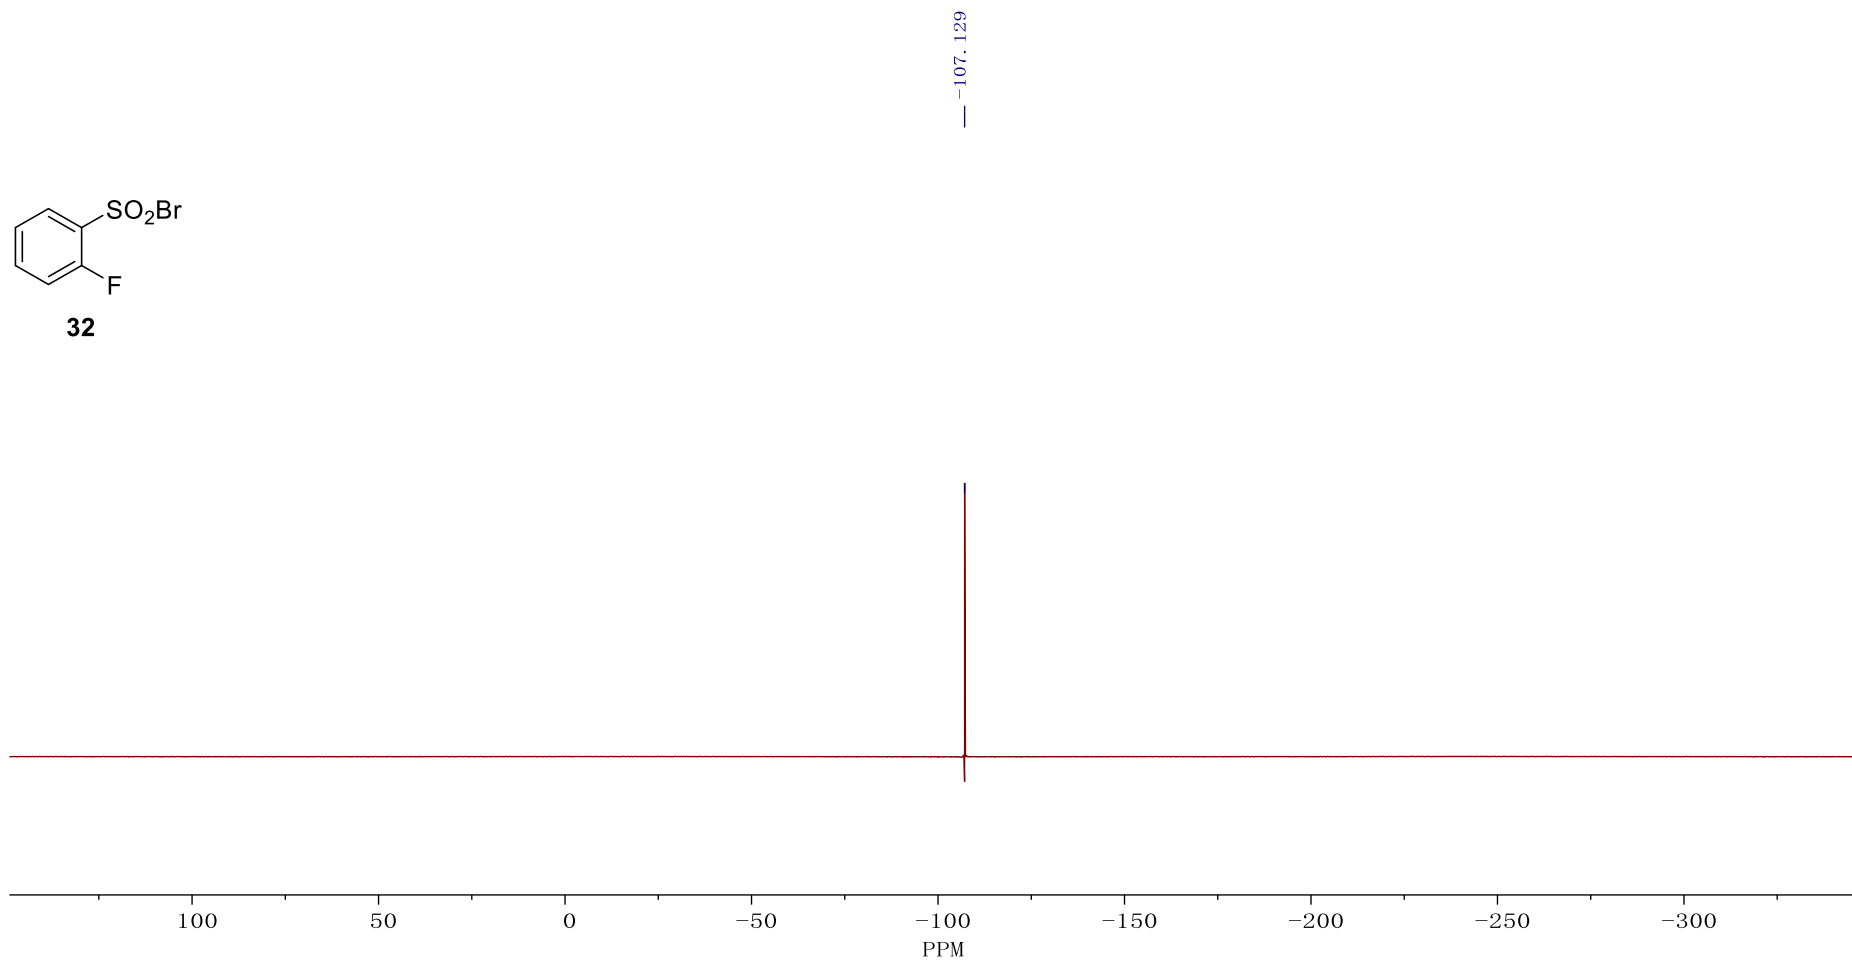

S114

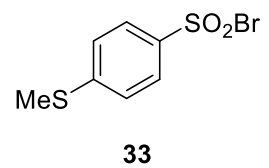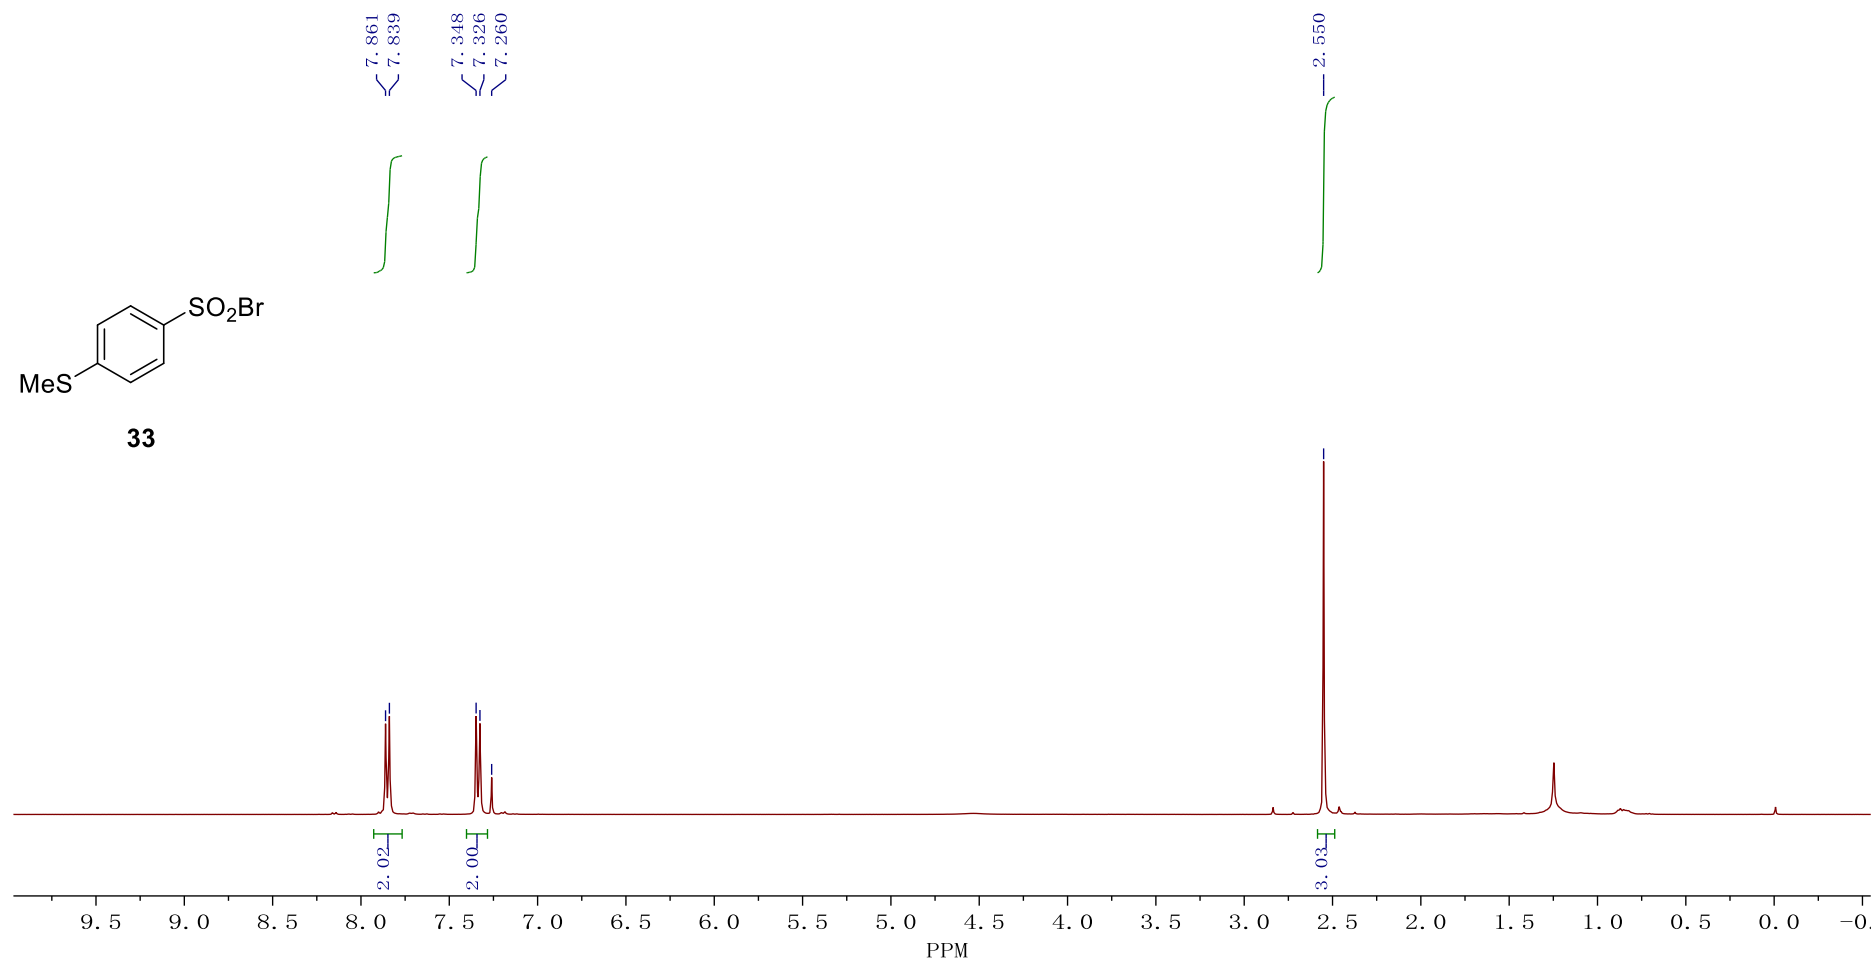

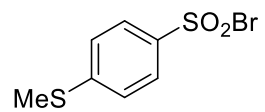

**33**

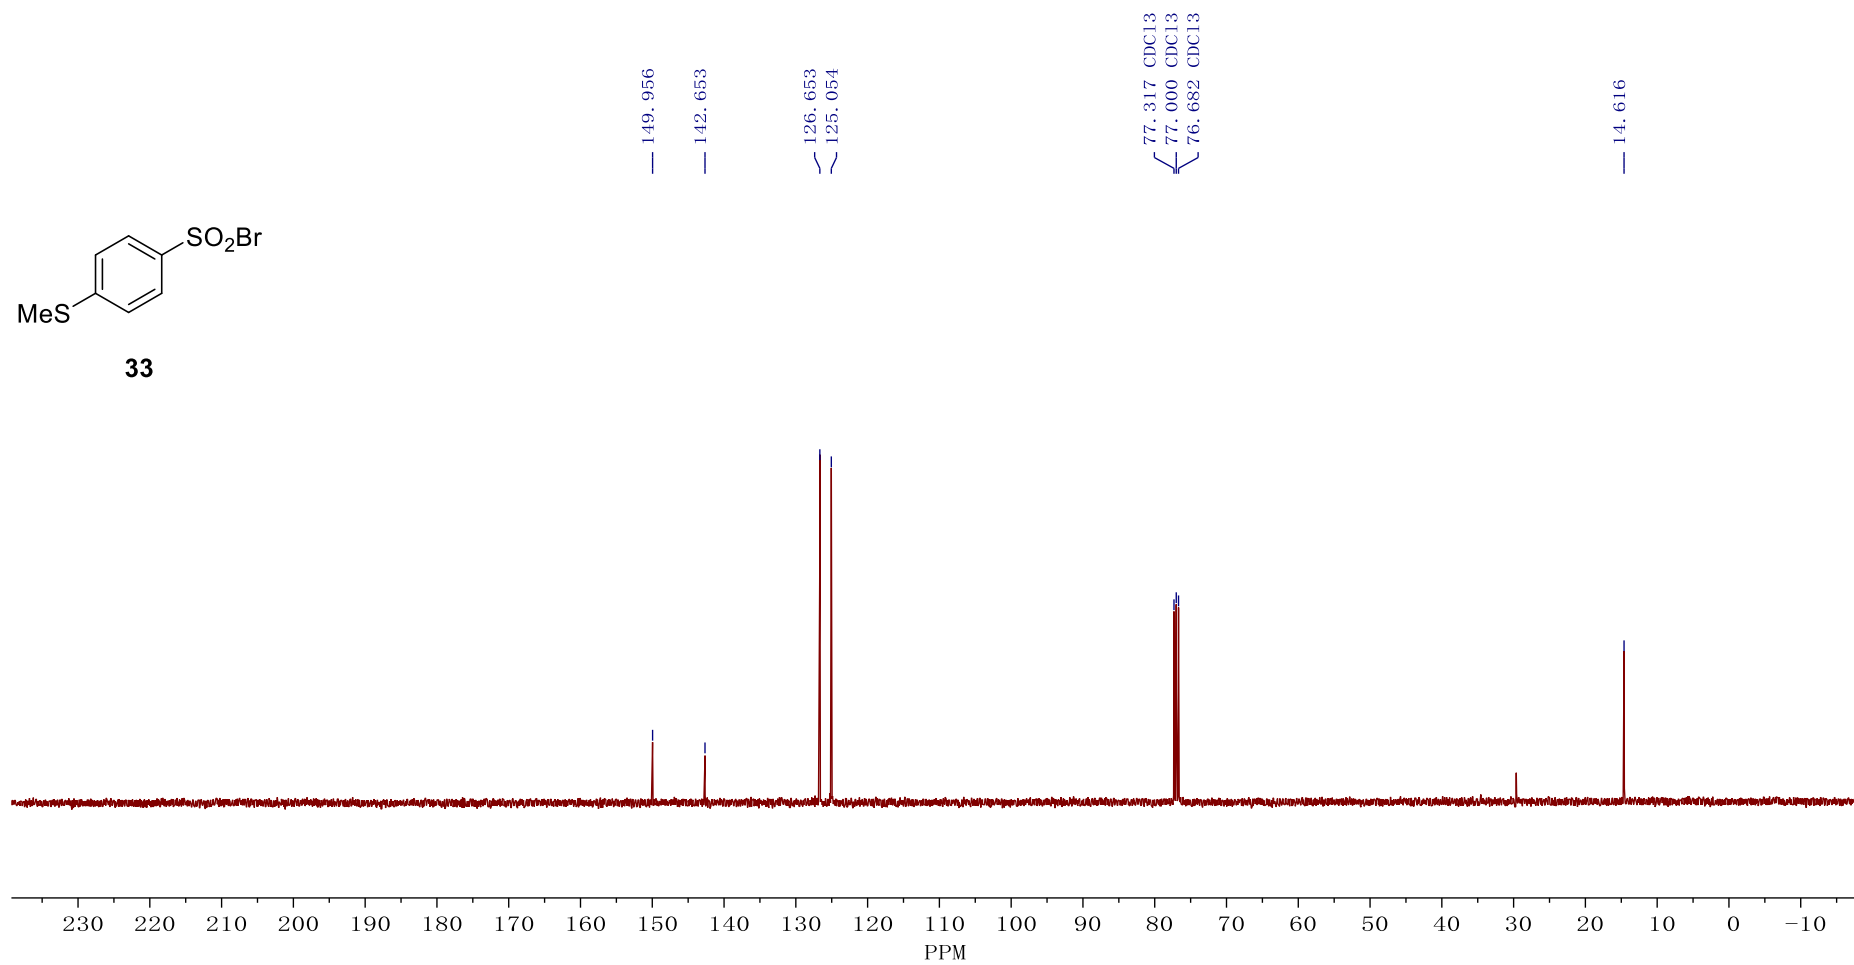

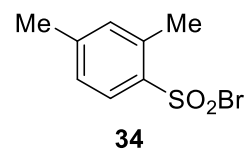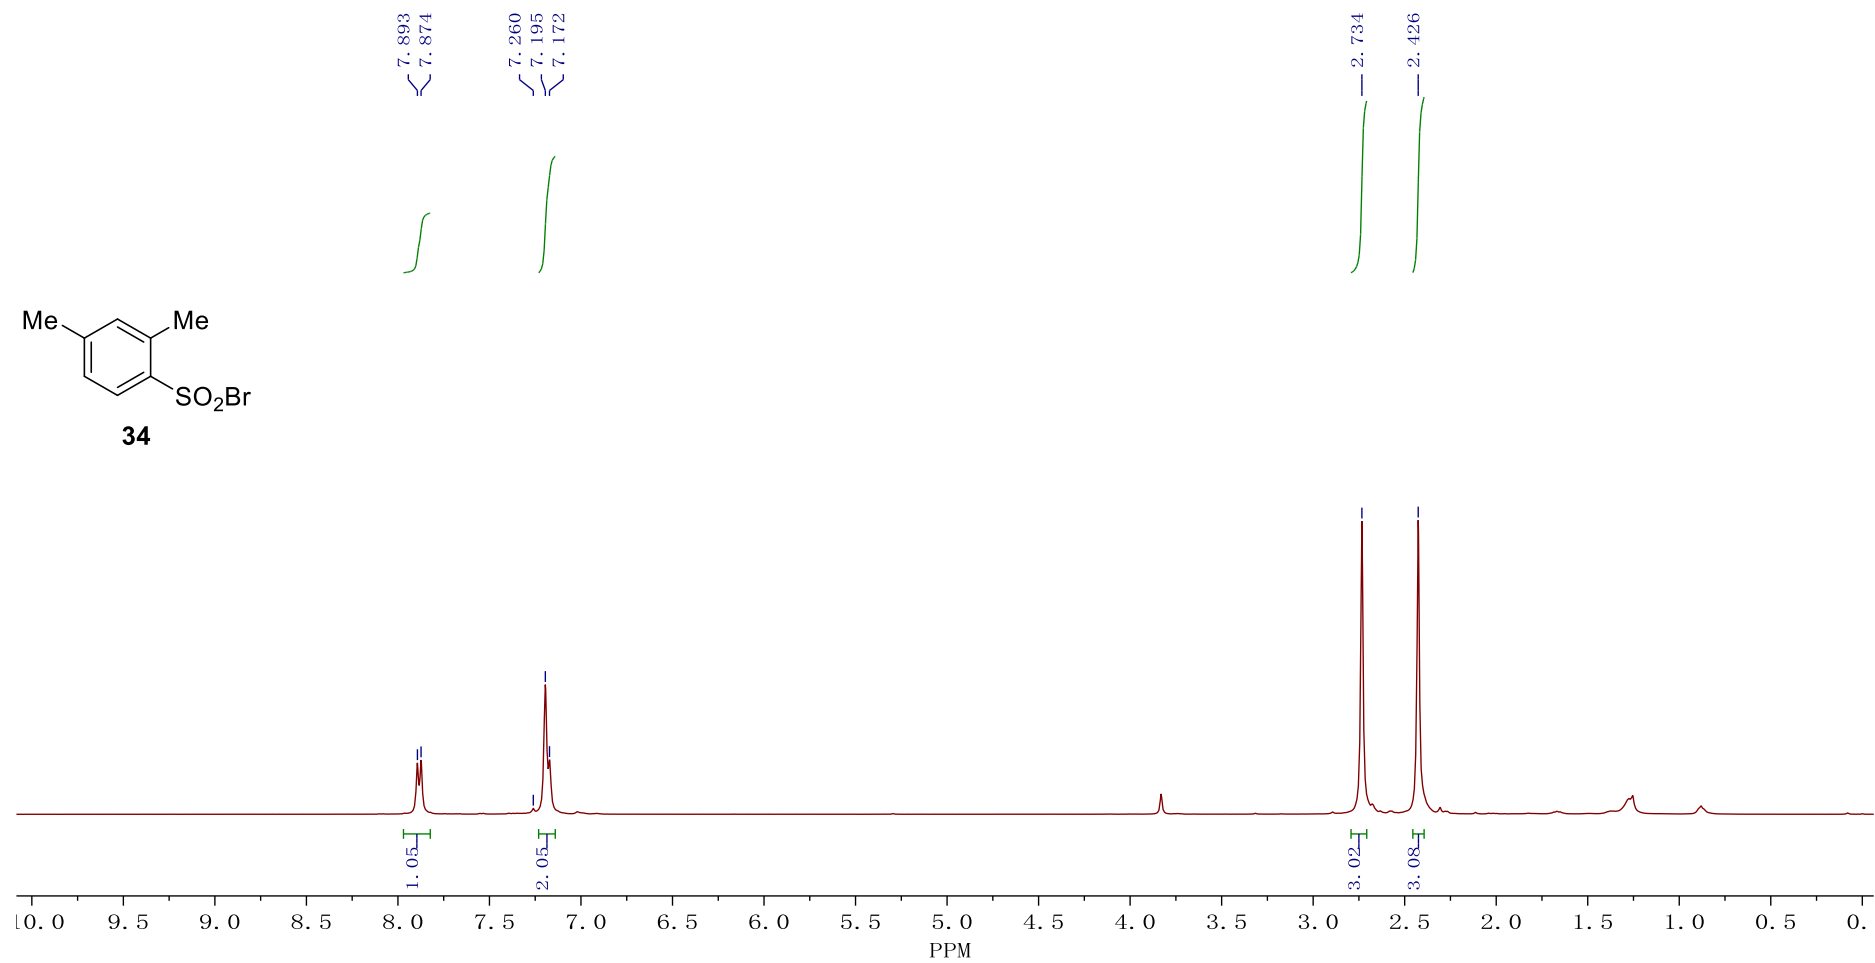

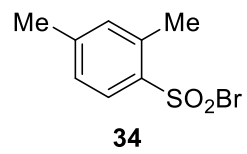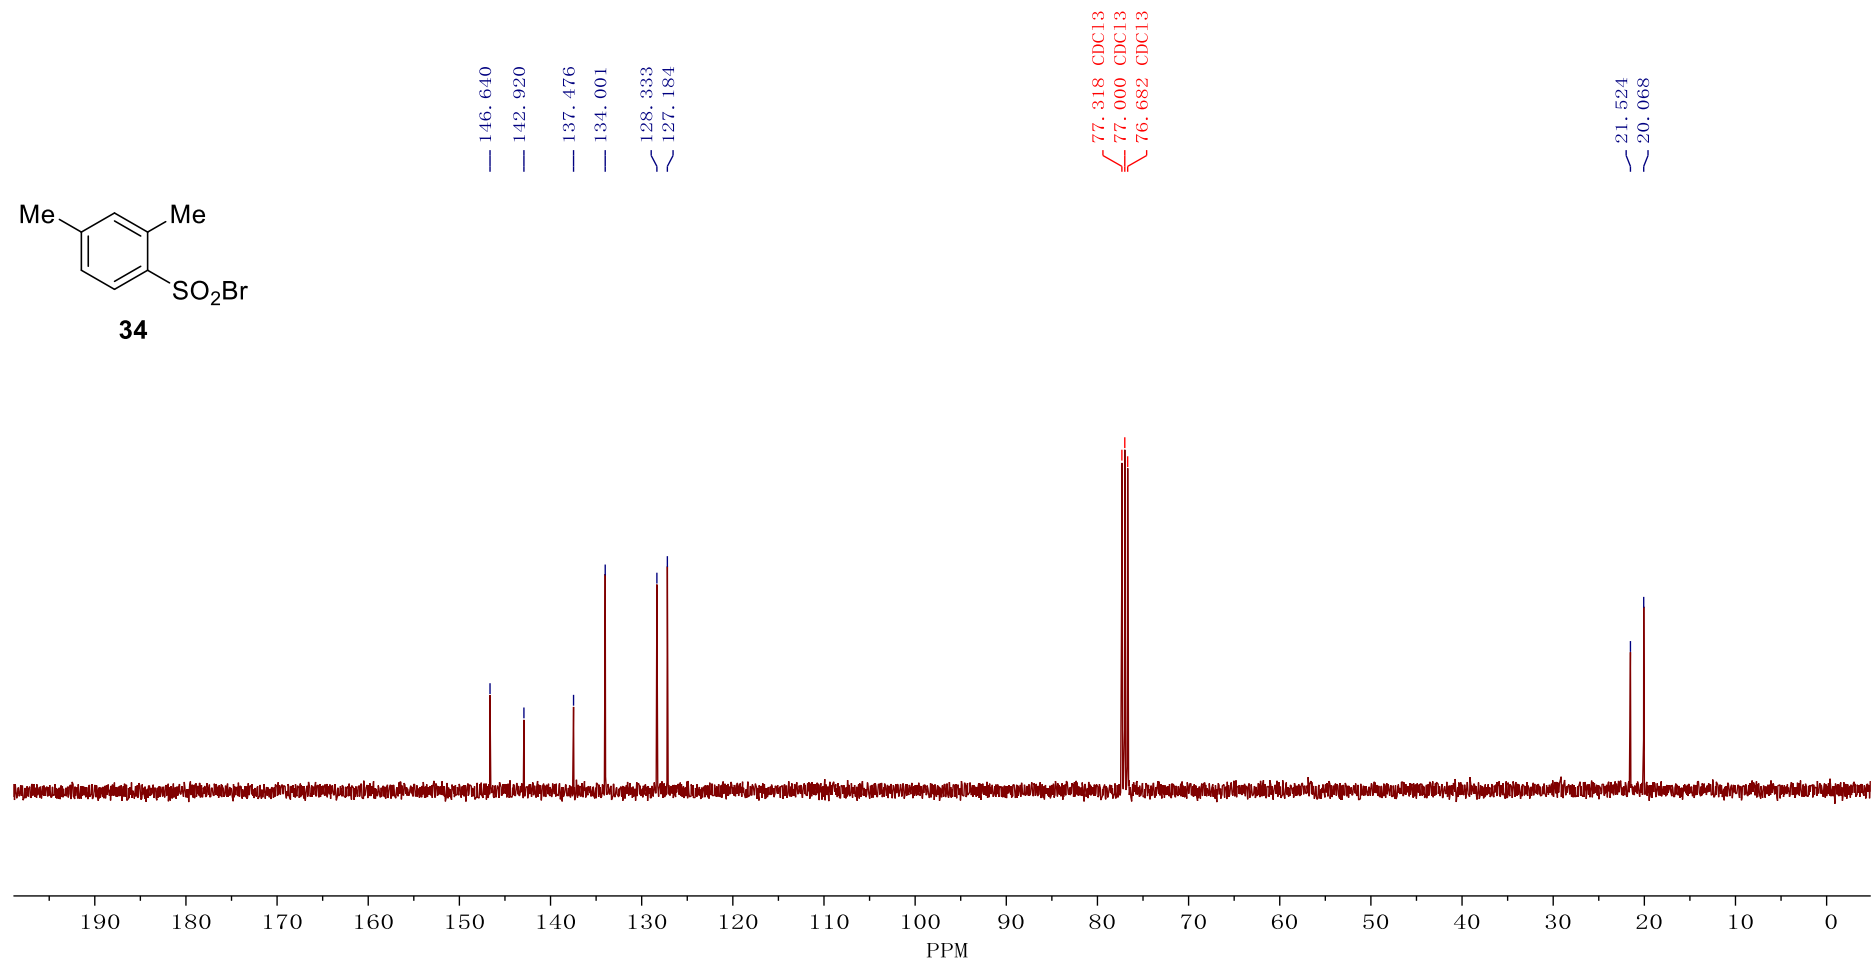

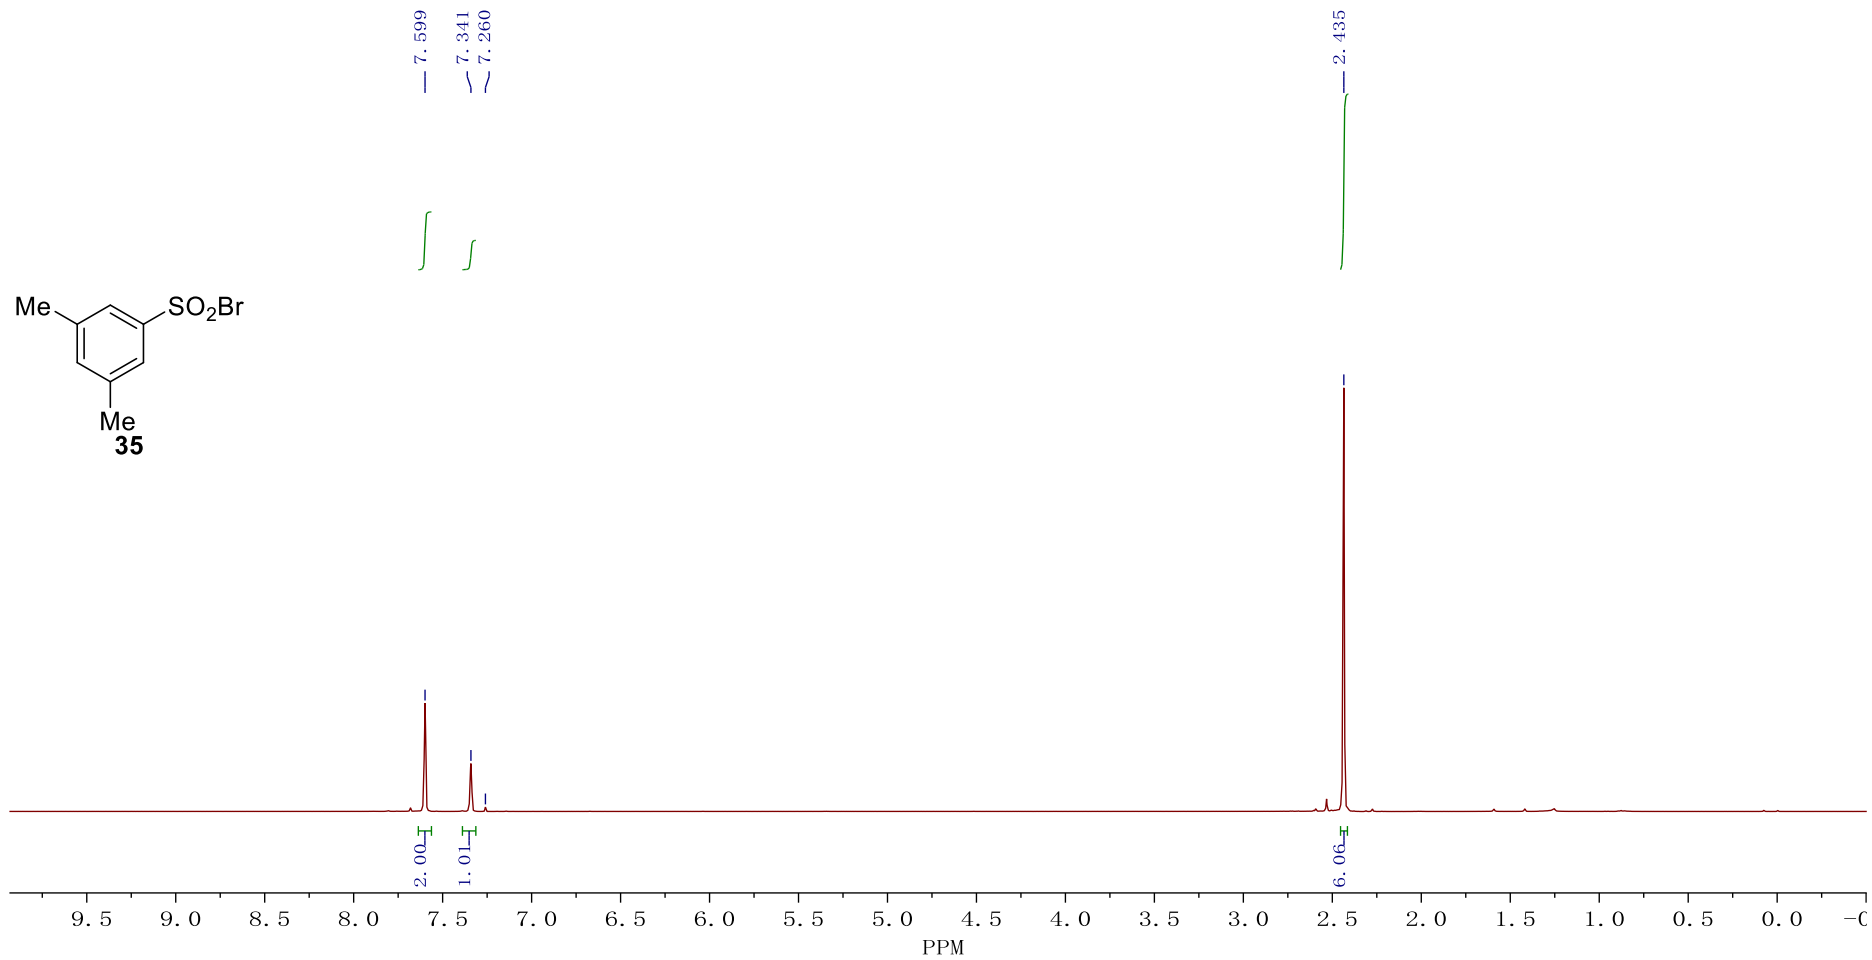

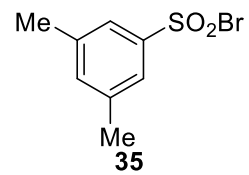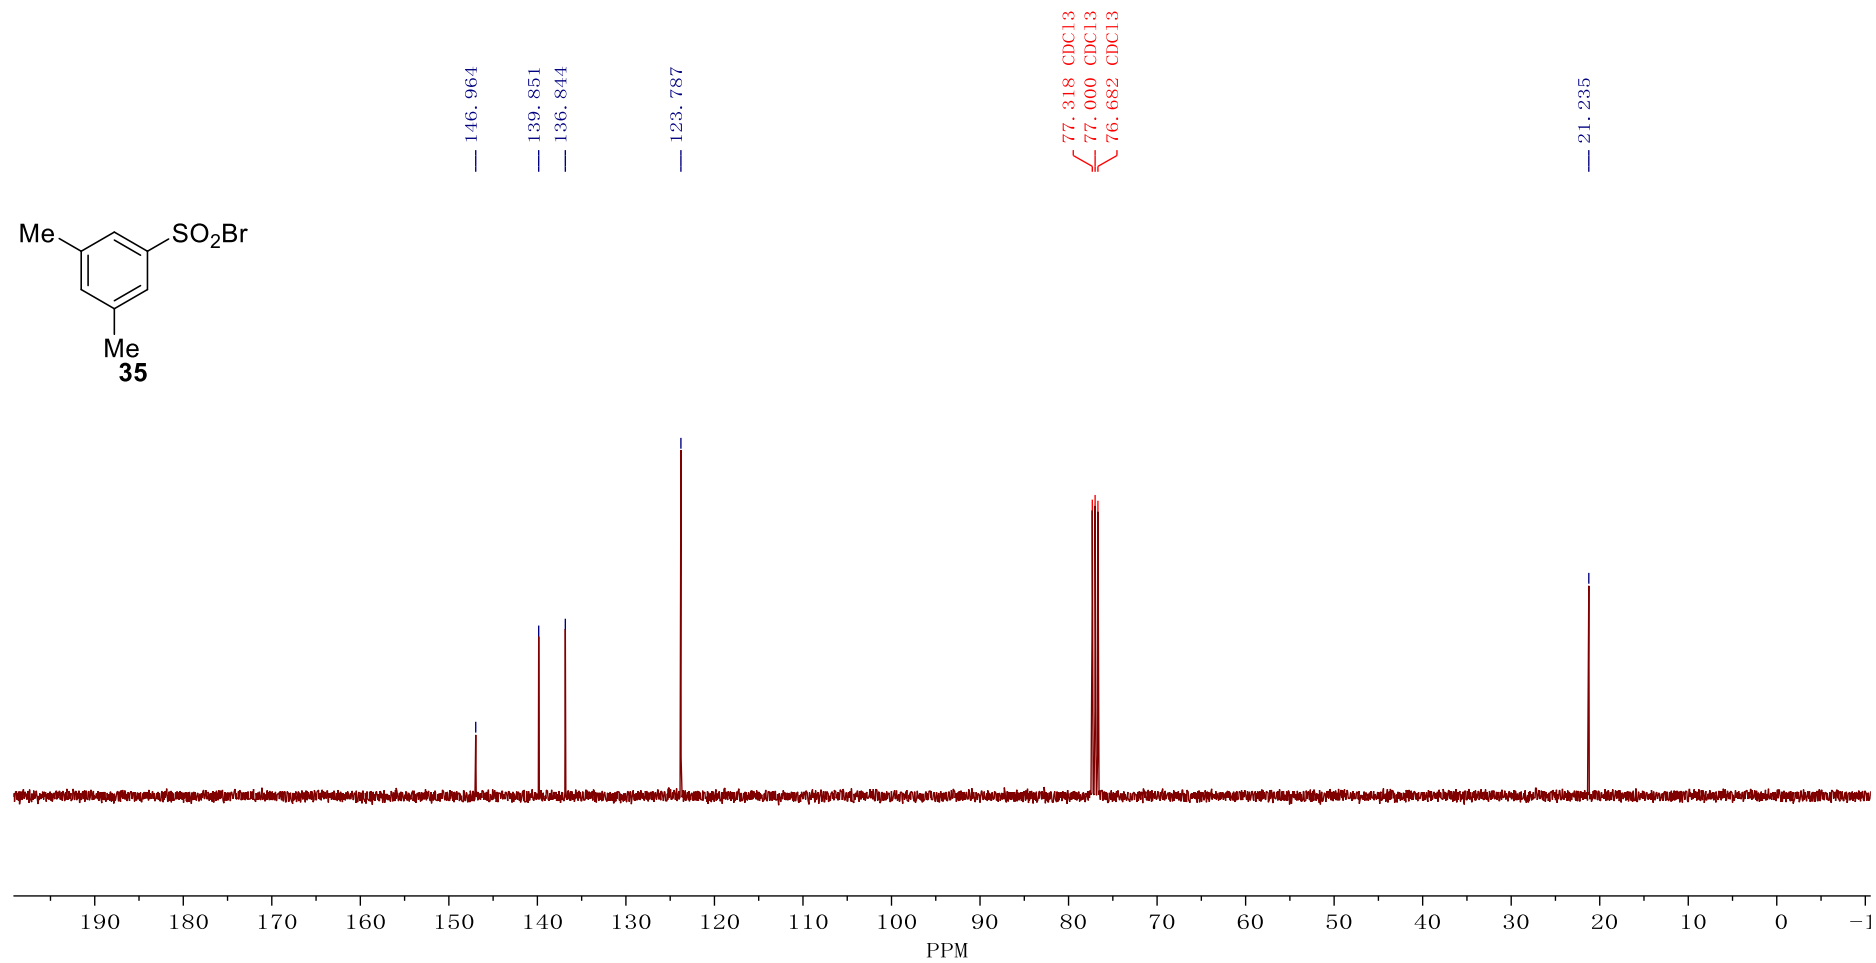

S120



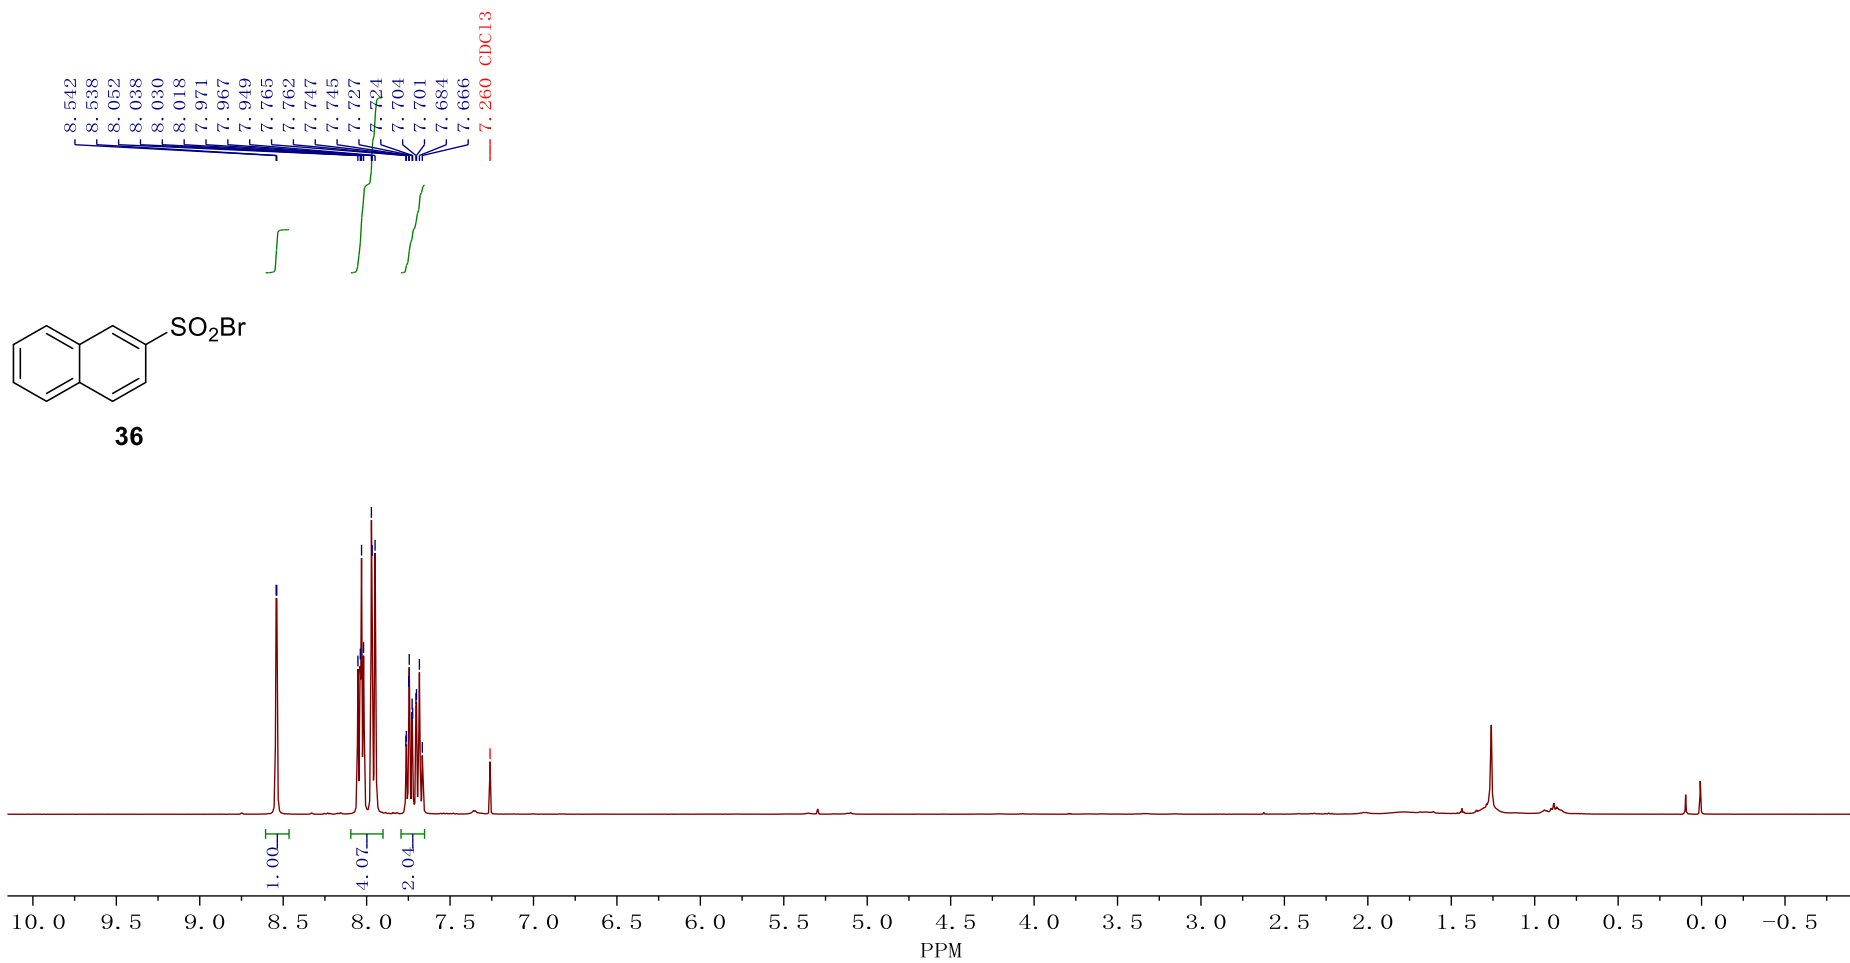

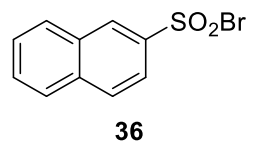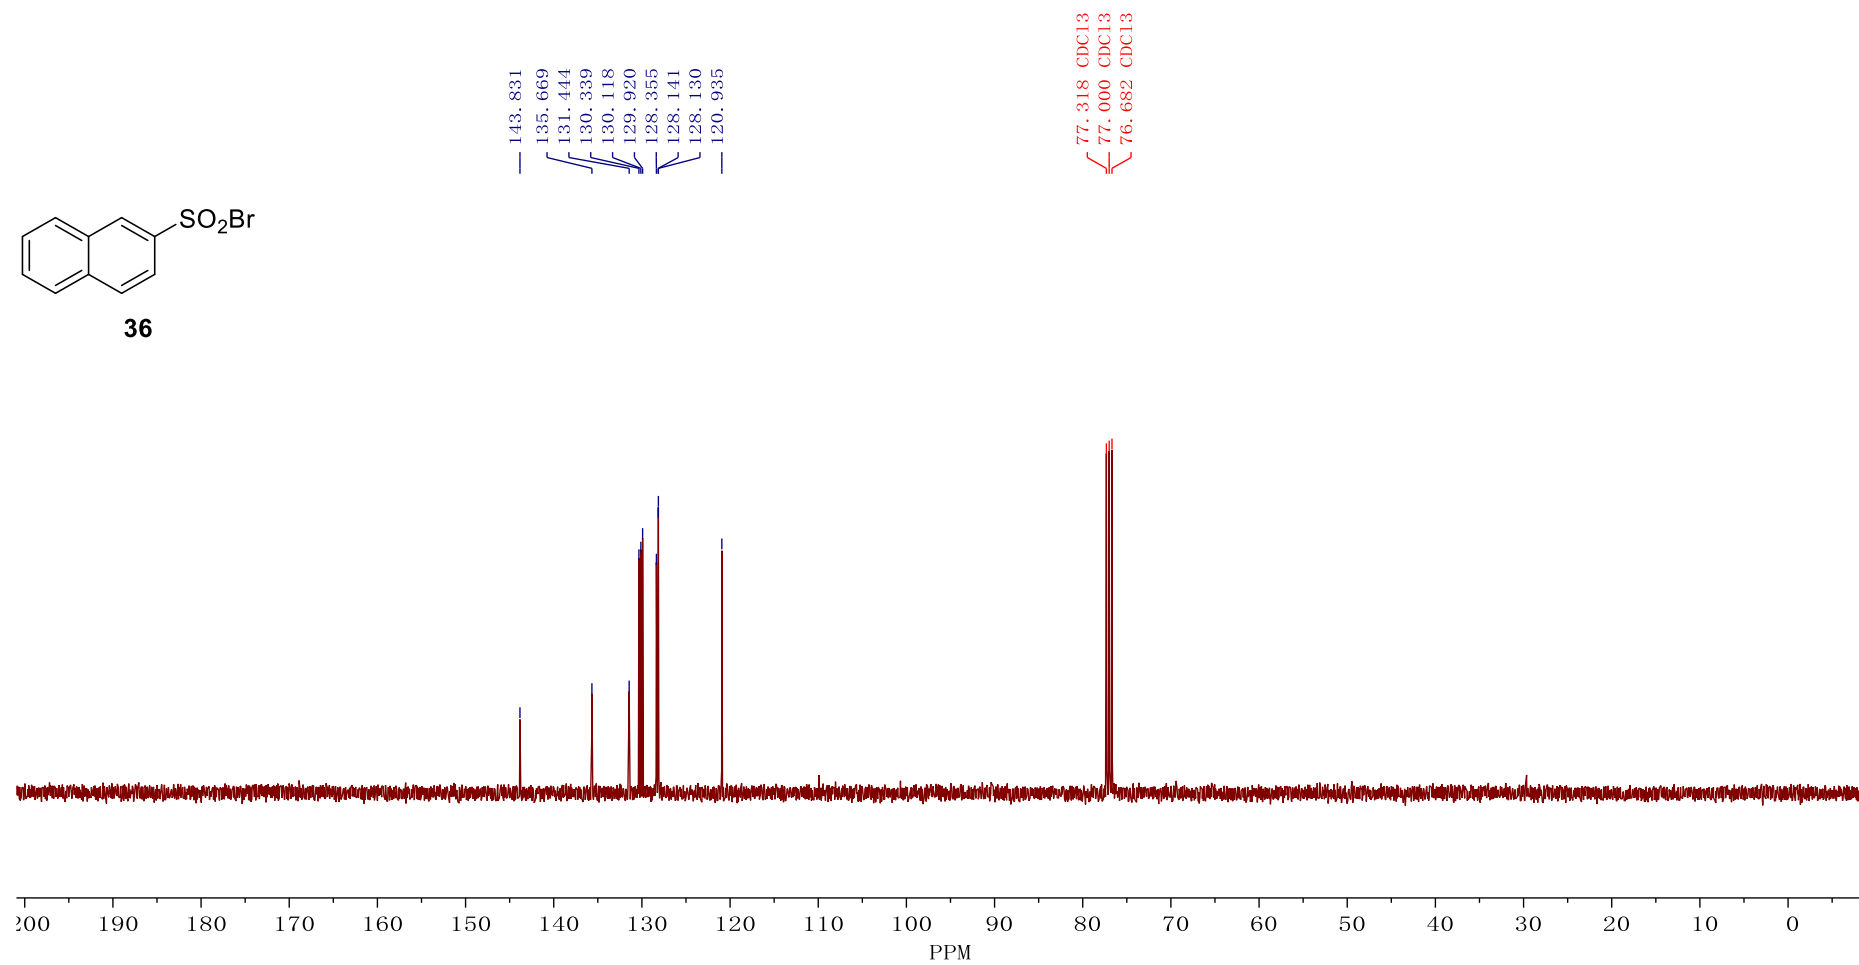

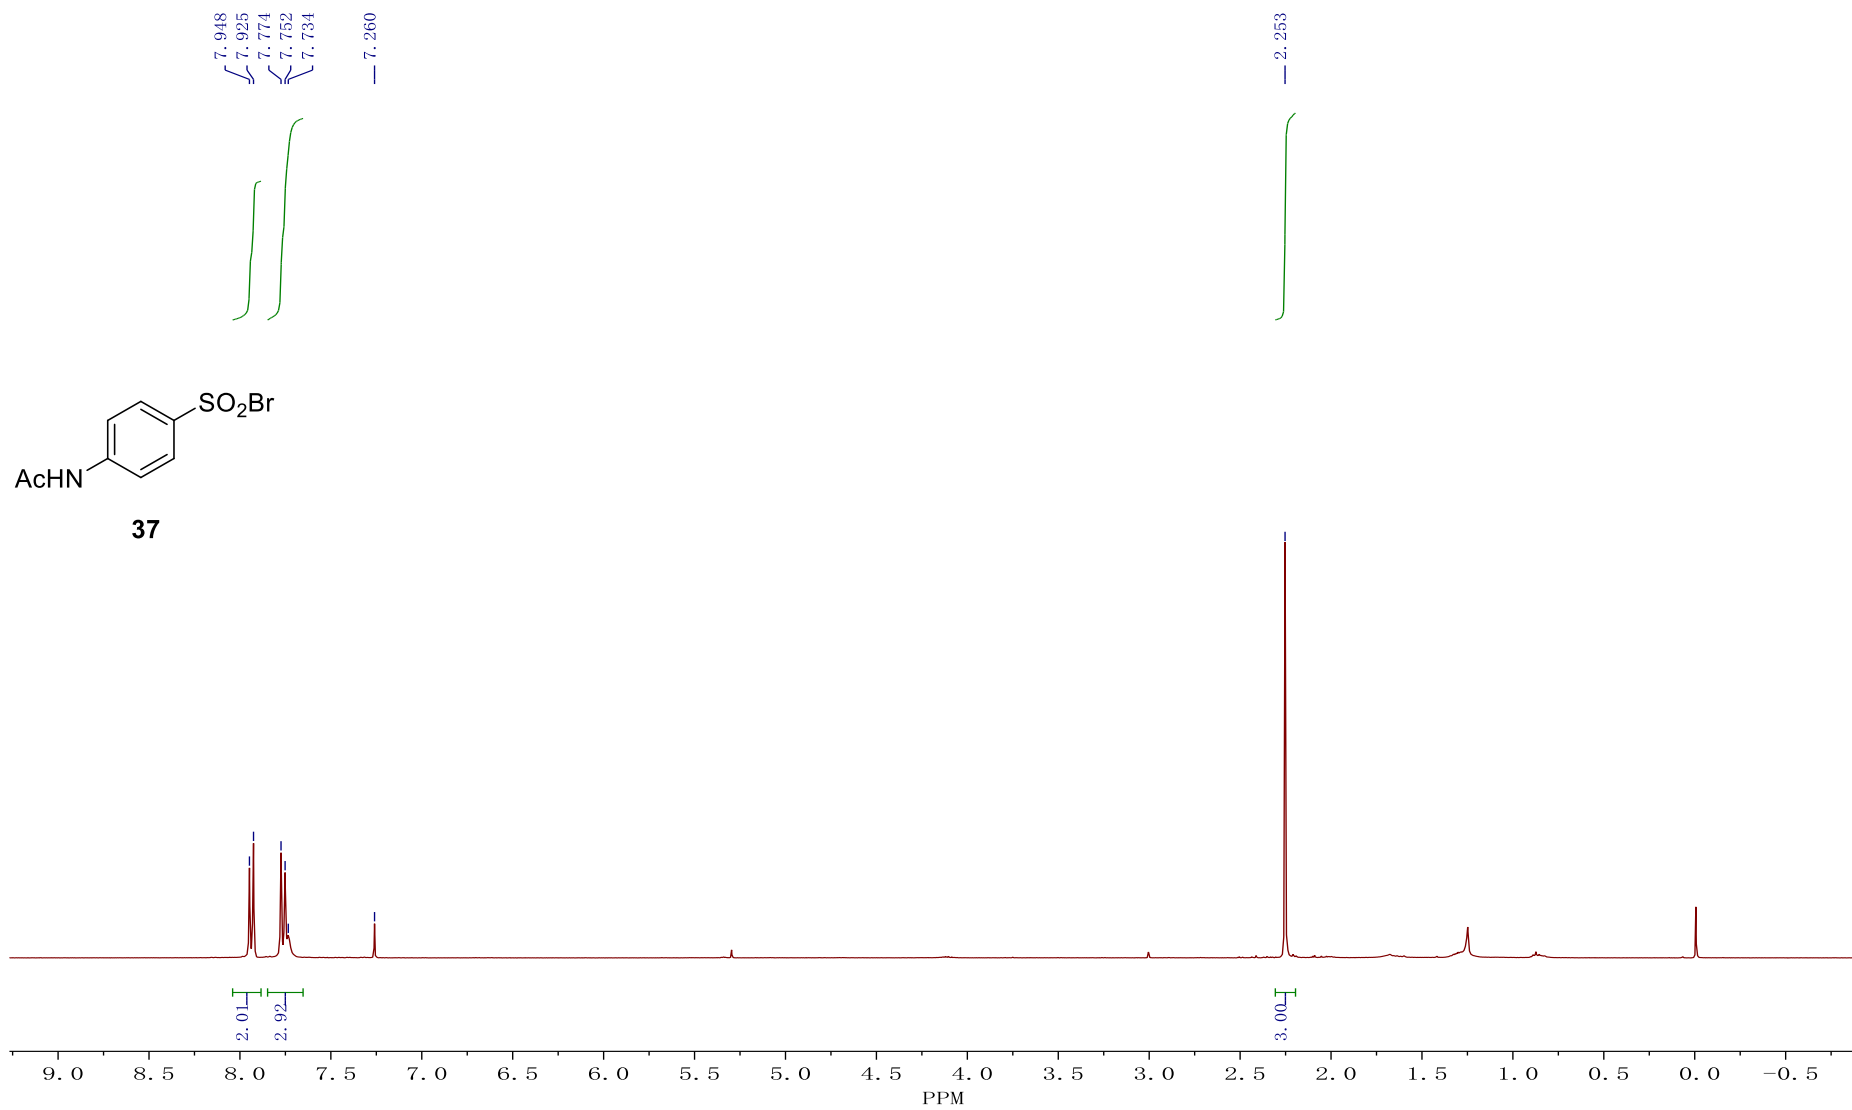

S123

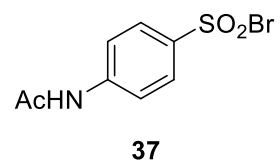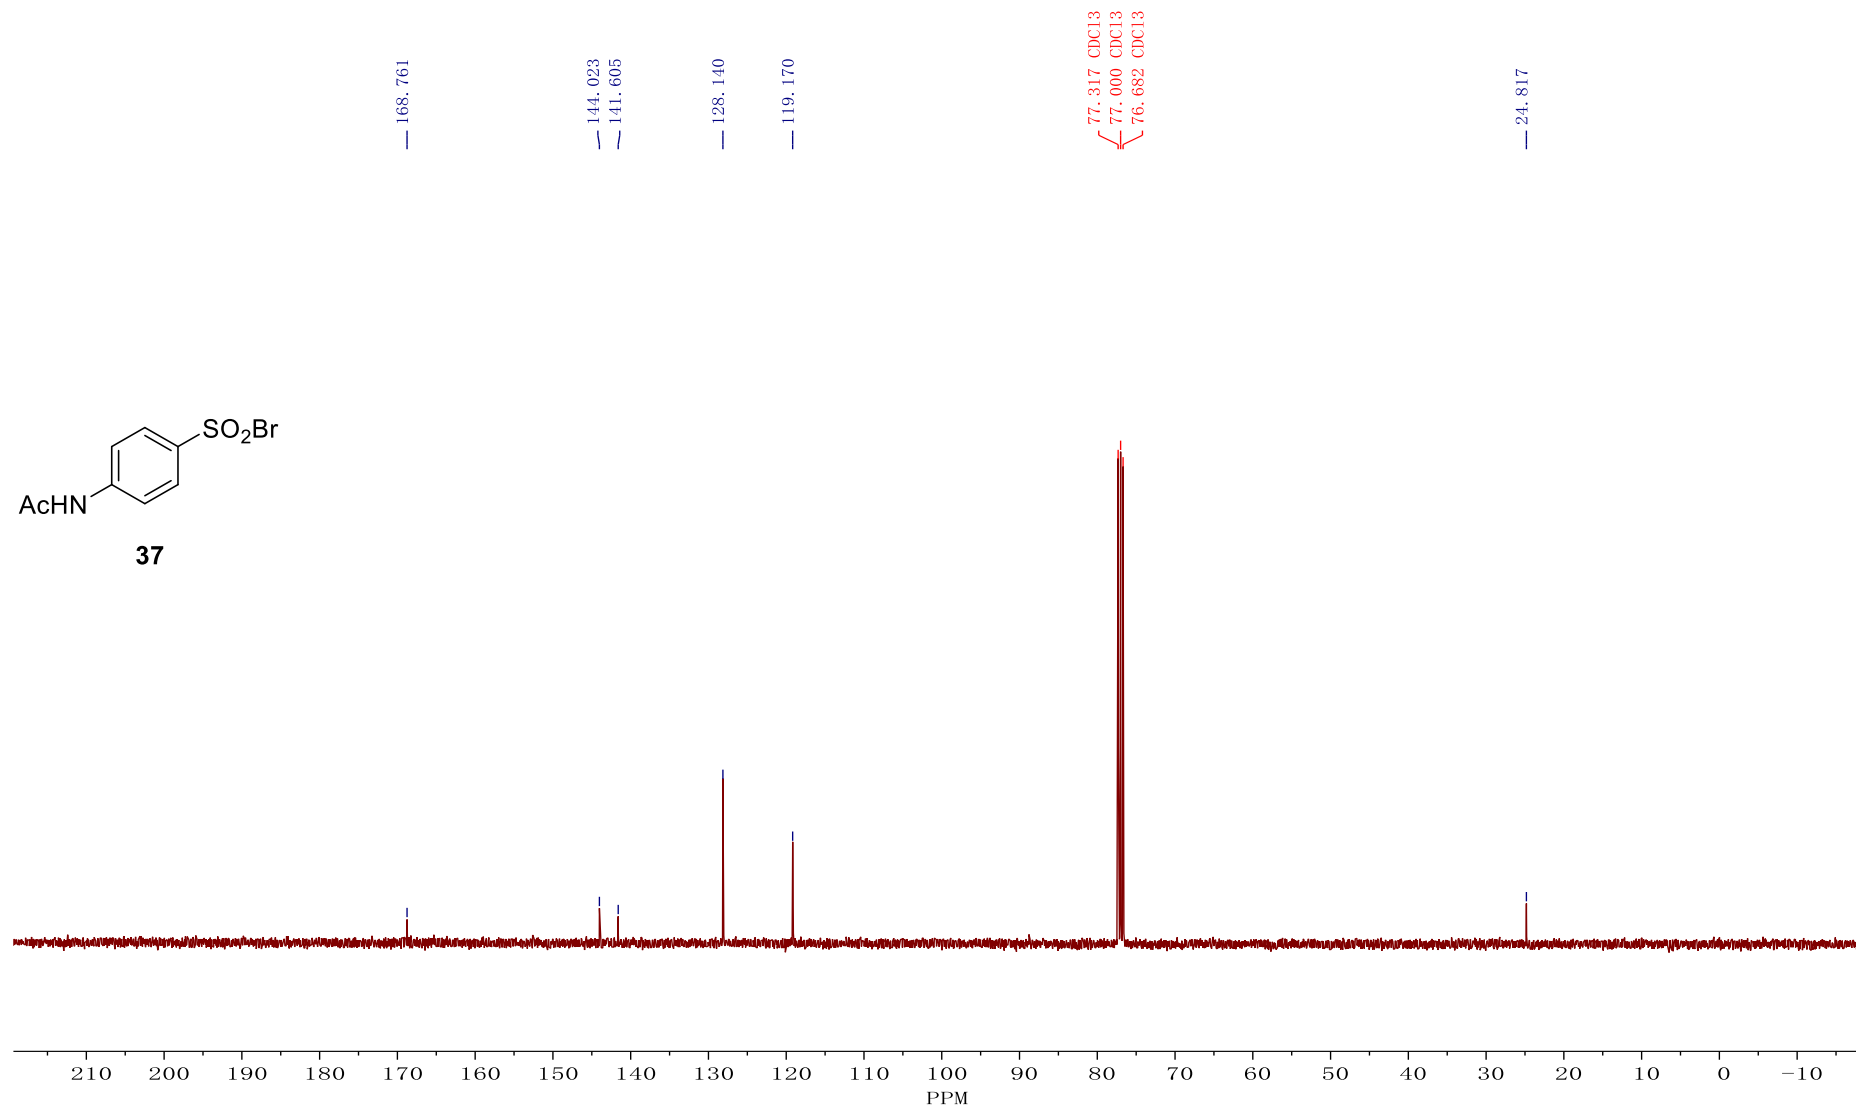

S124

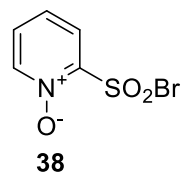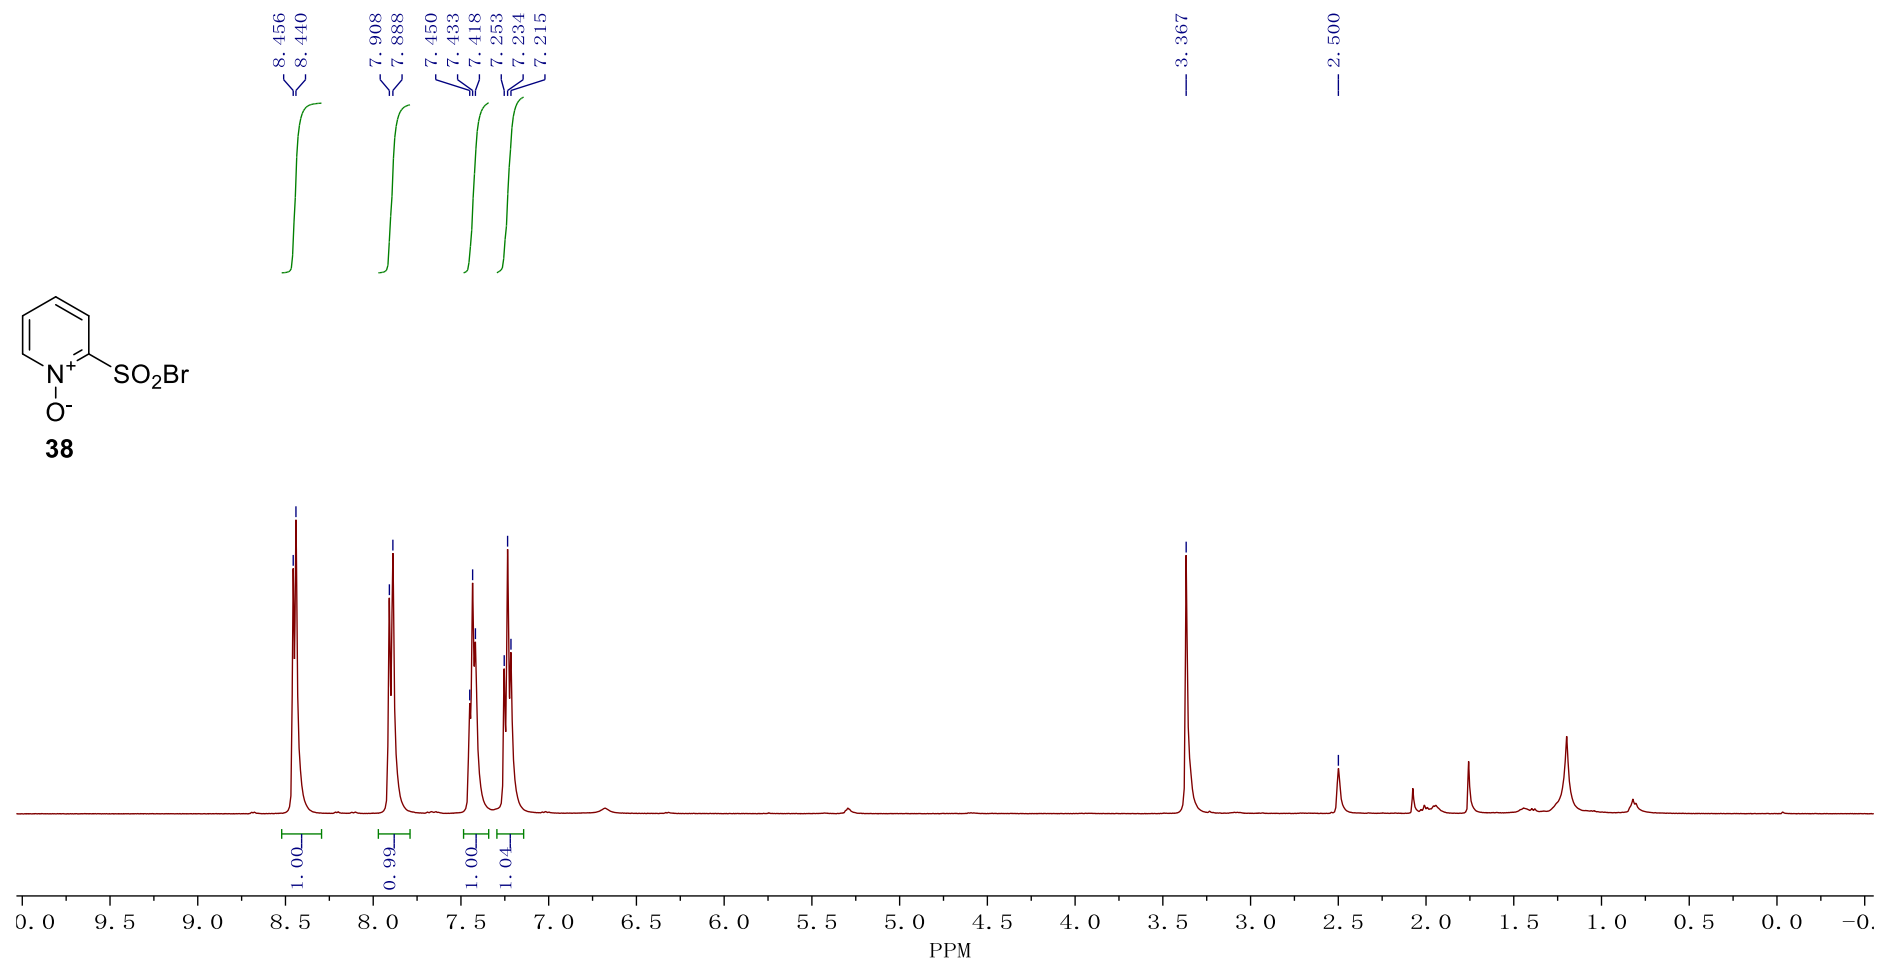

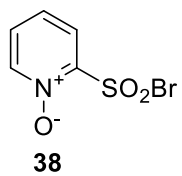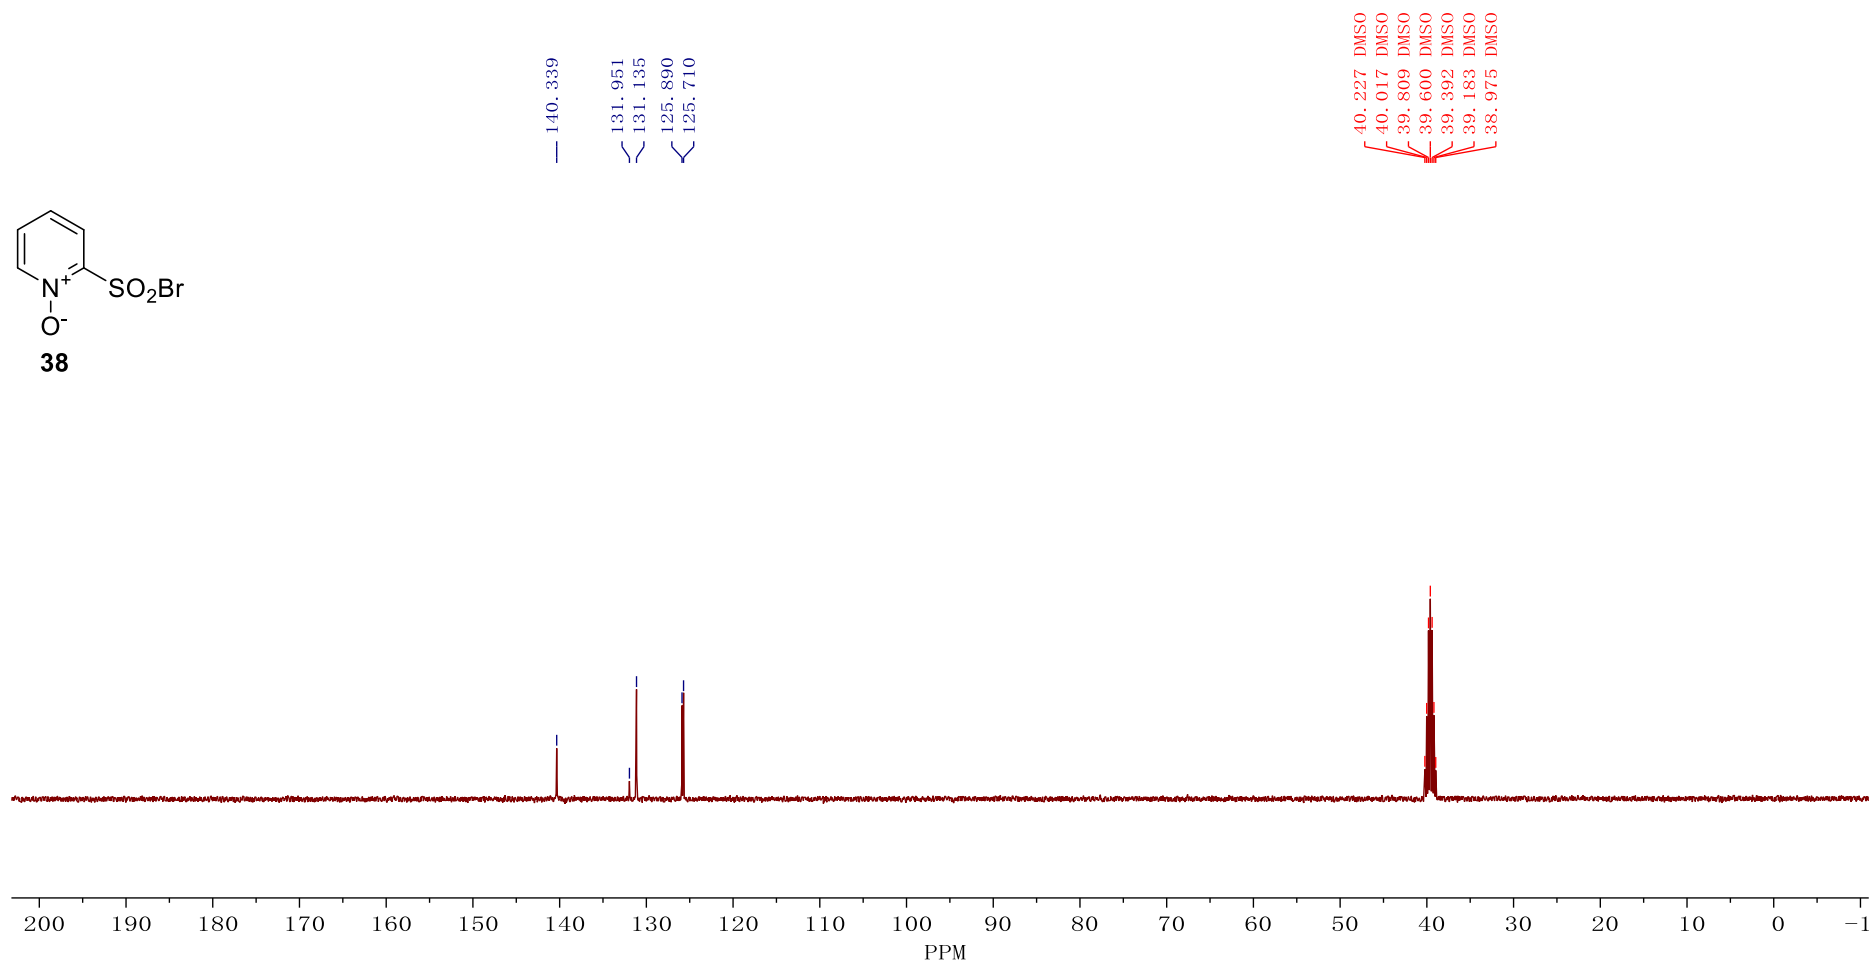

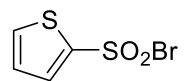

39

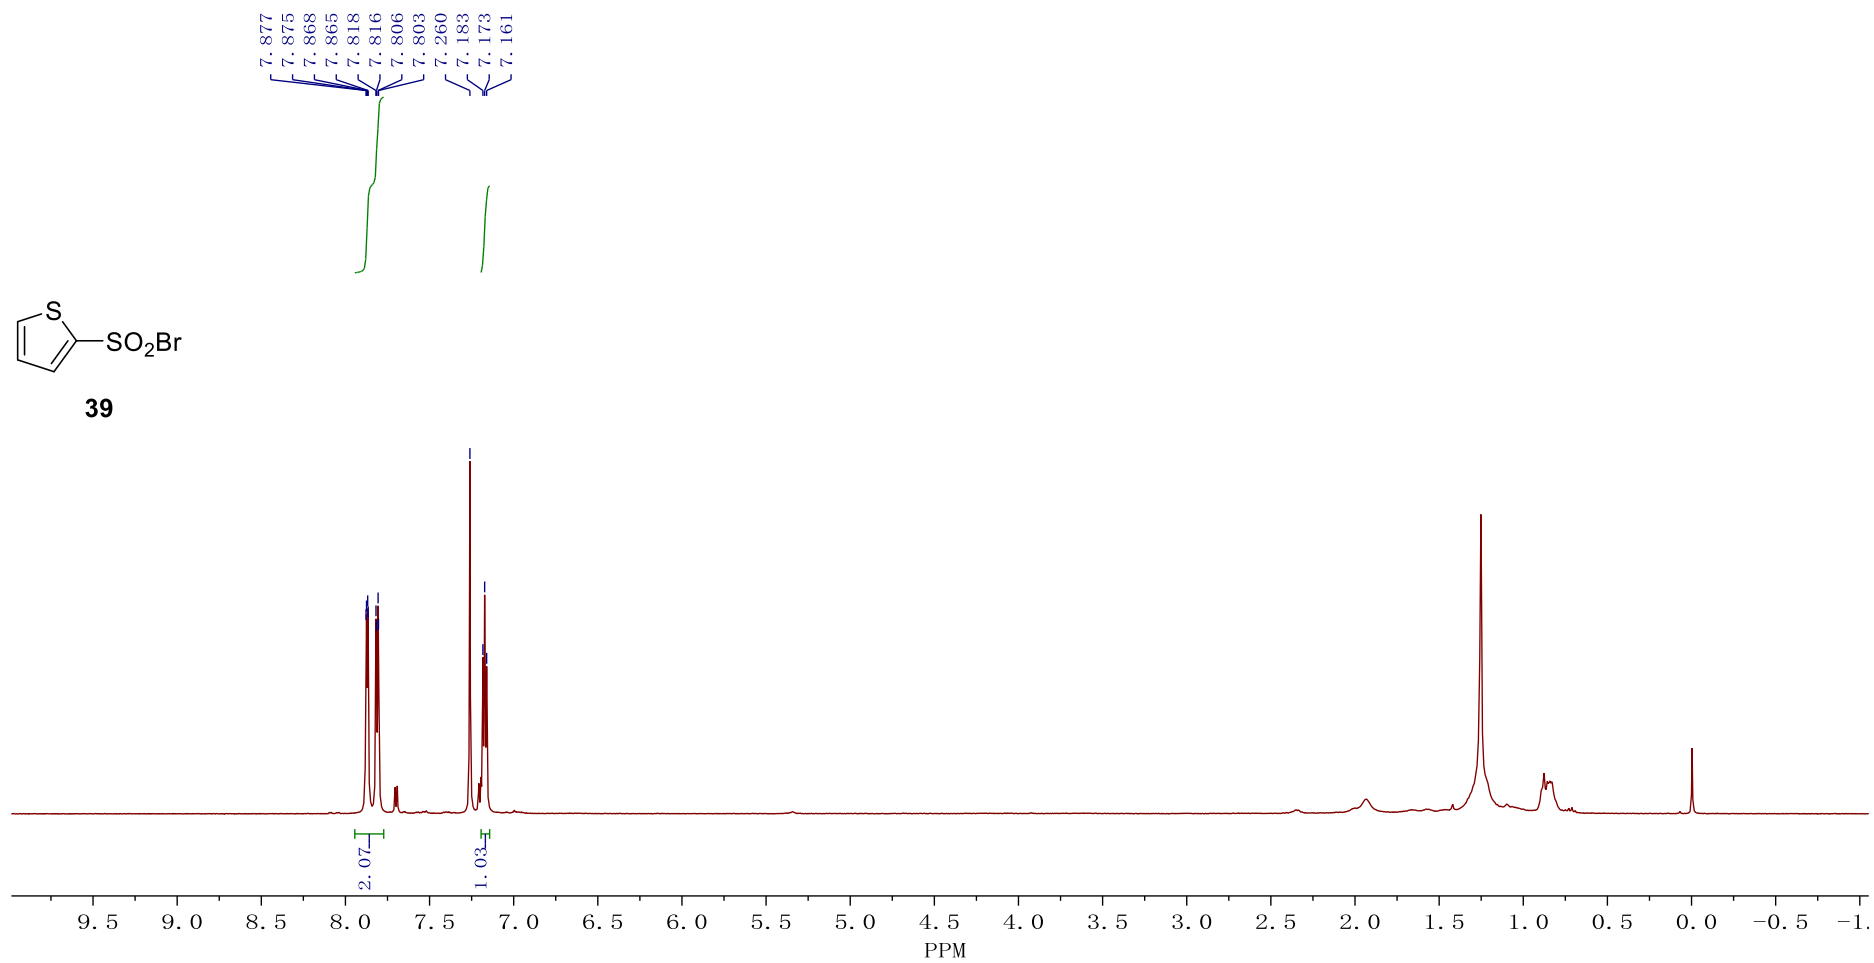

S127

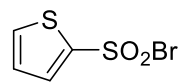

39

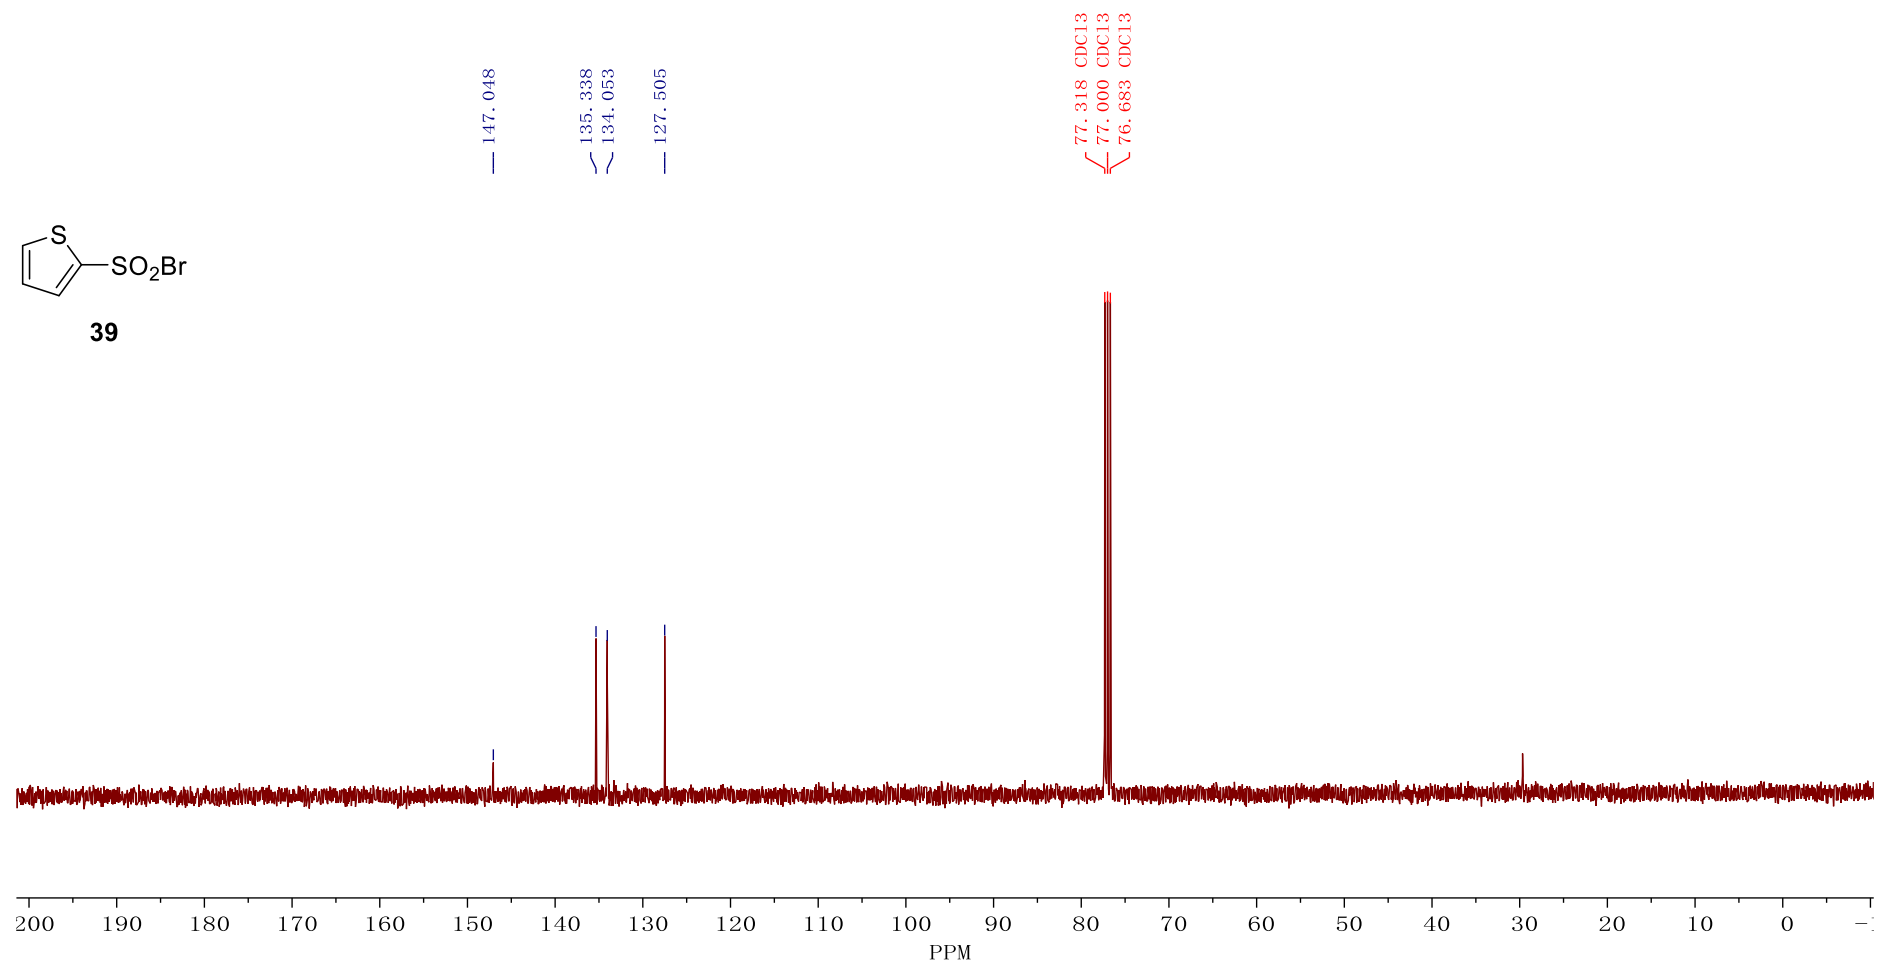

S128



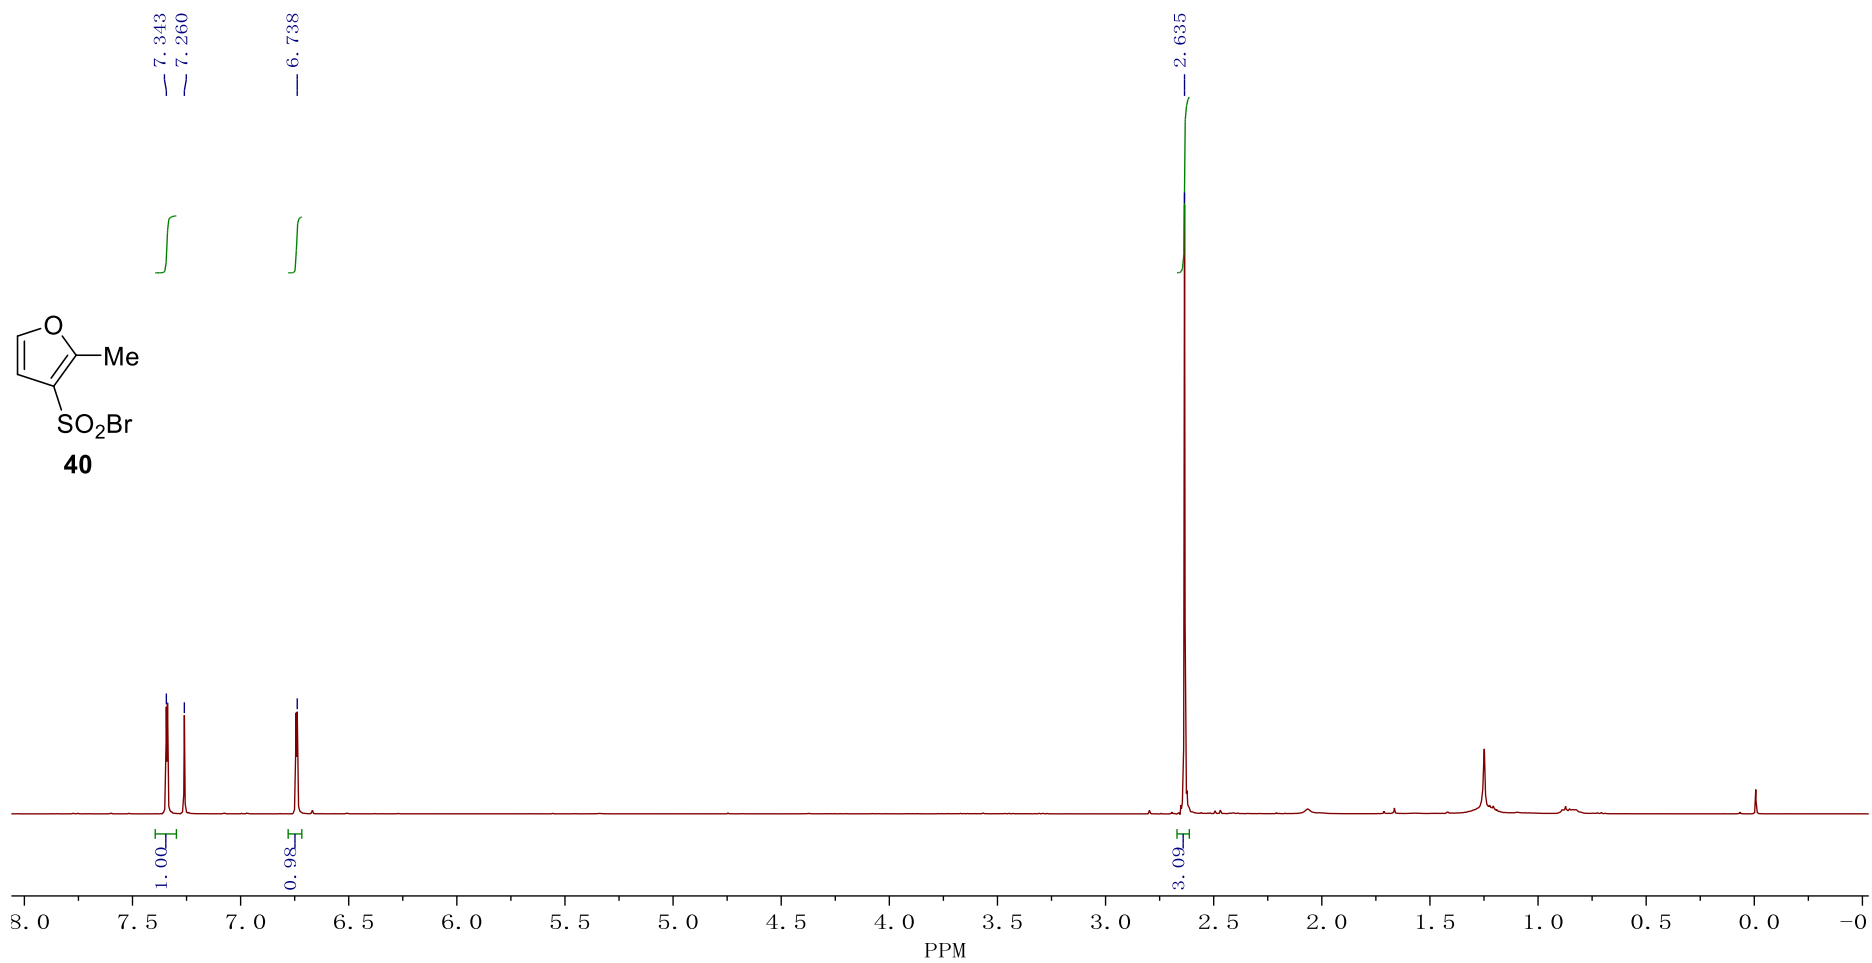

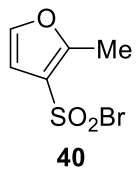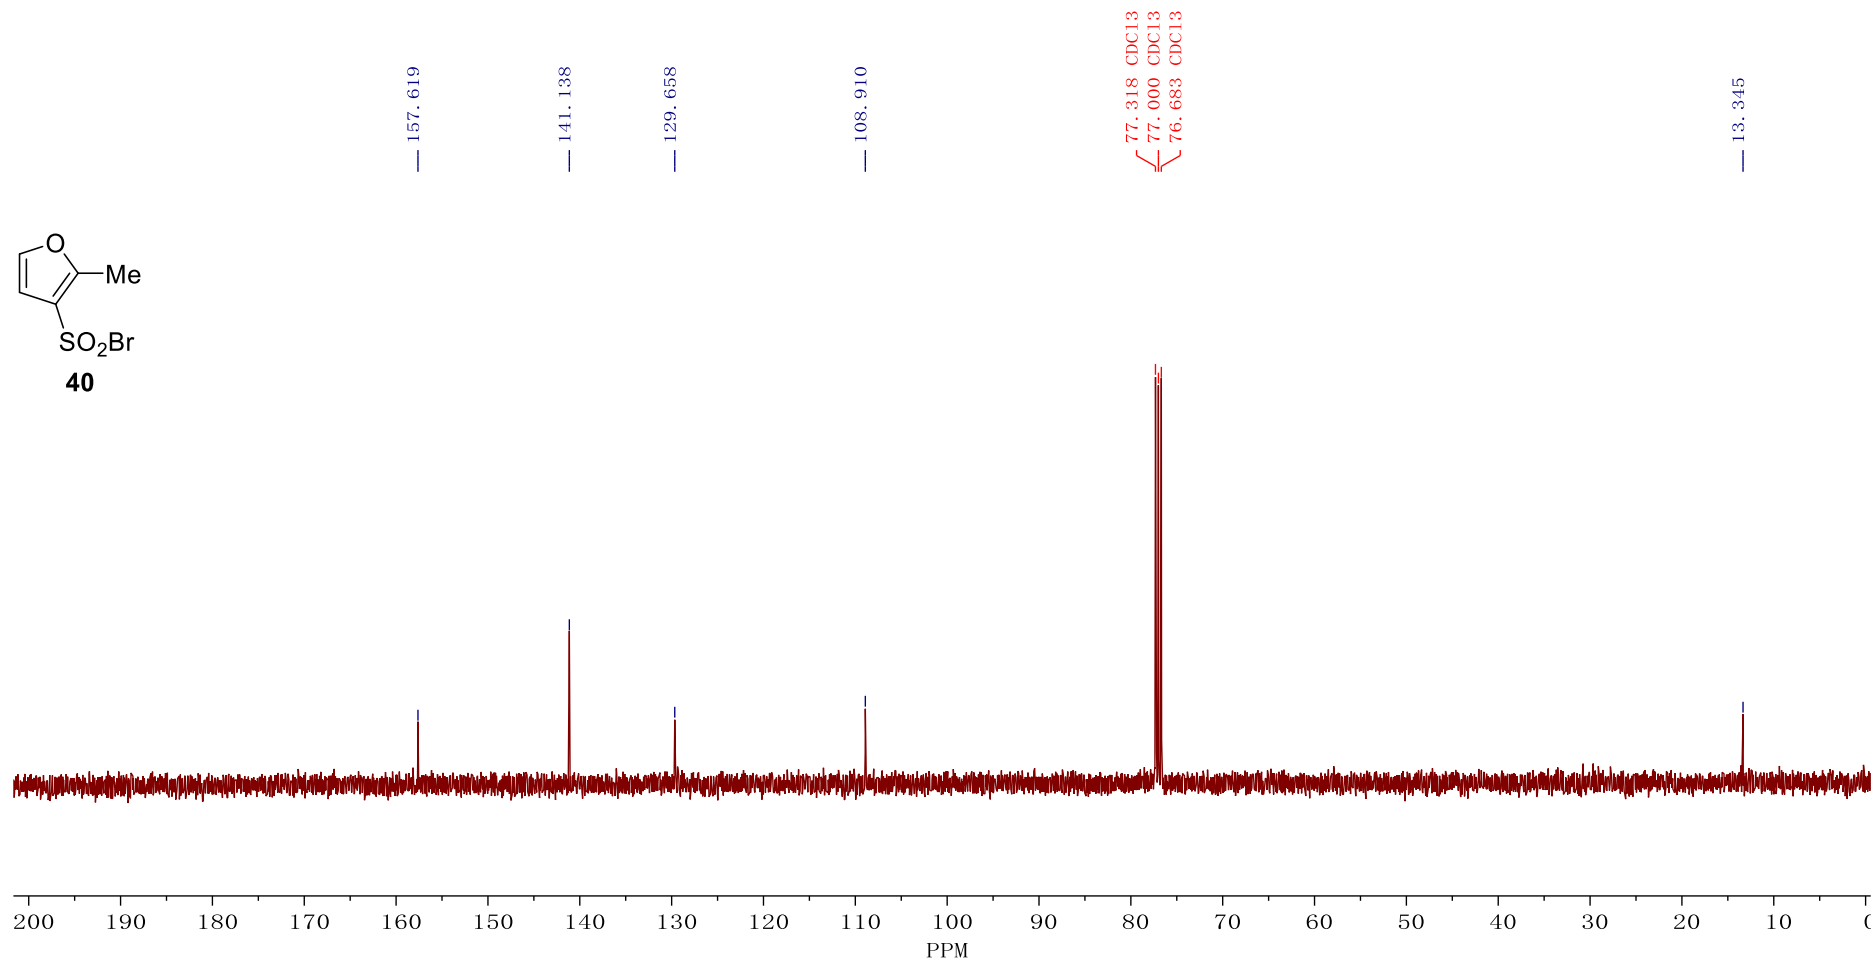

S130

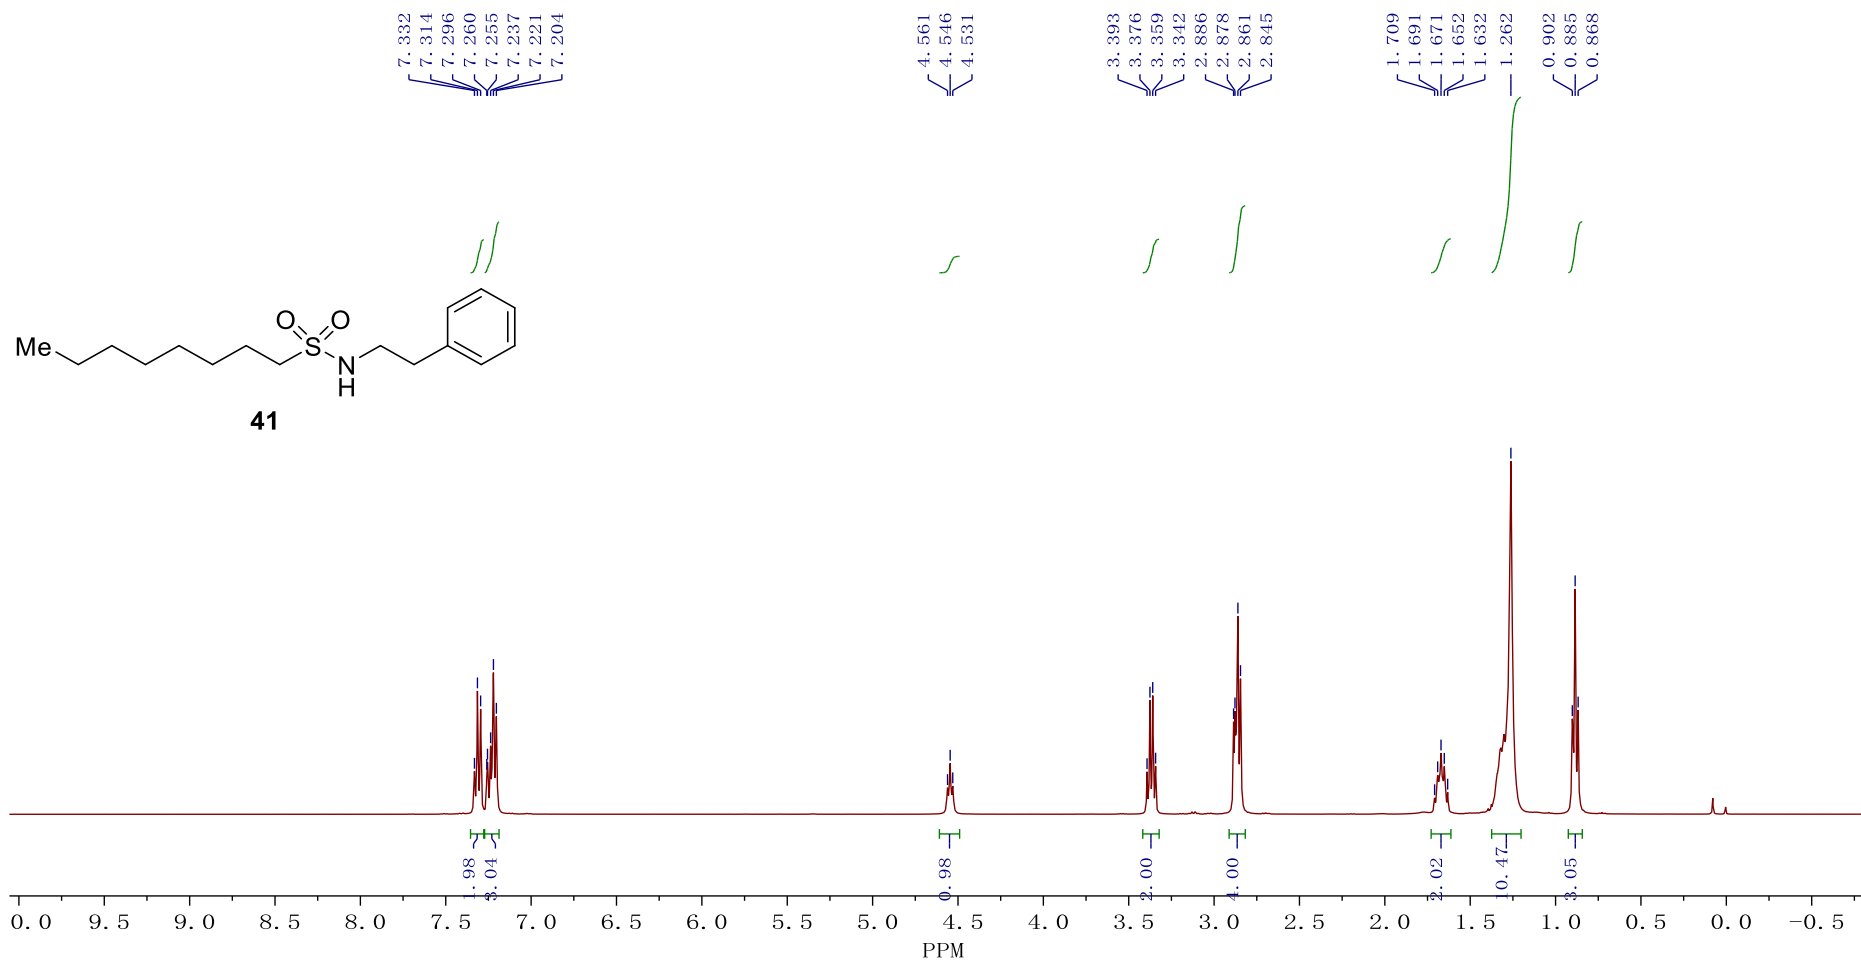

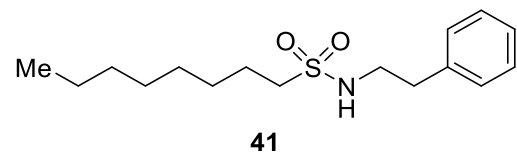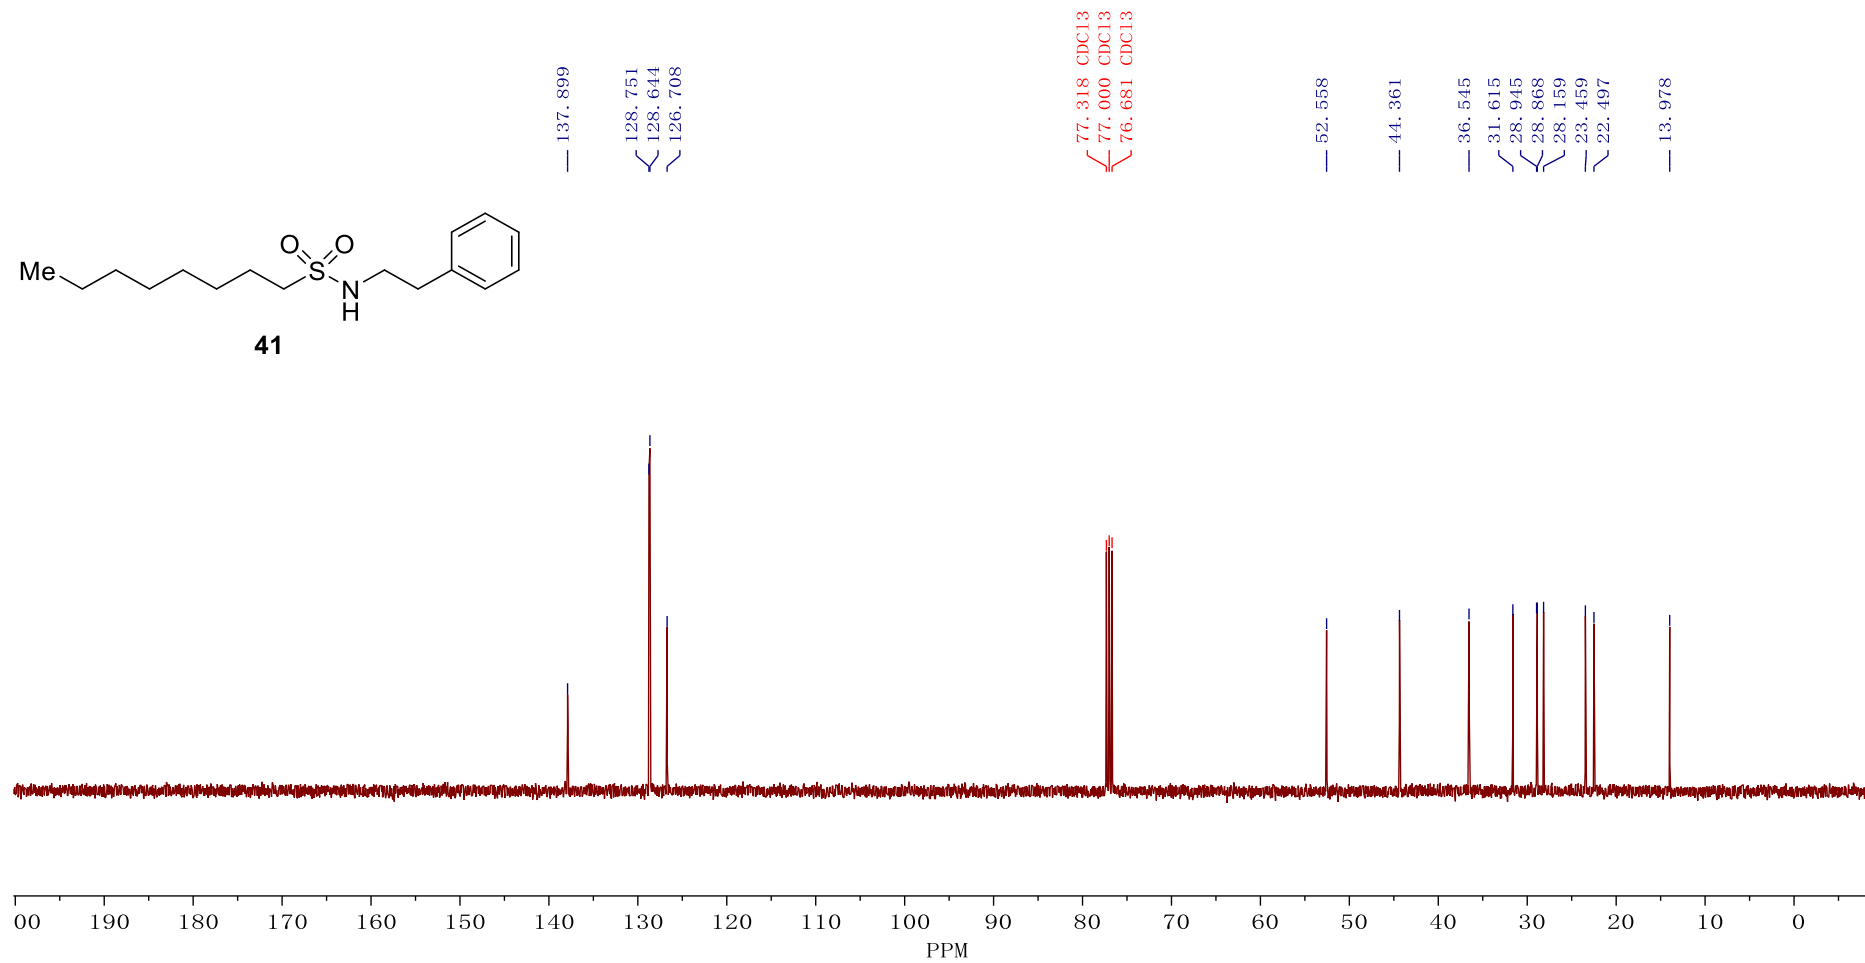

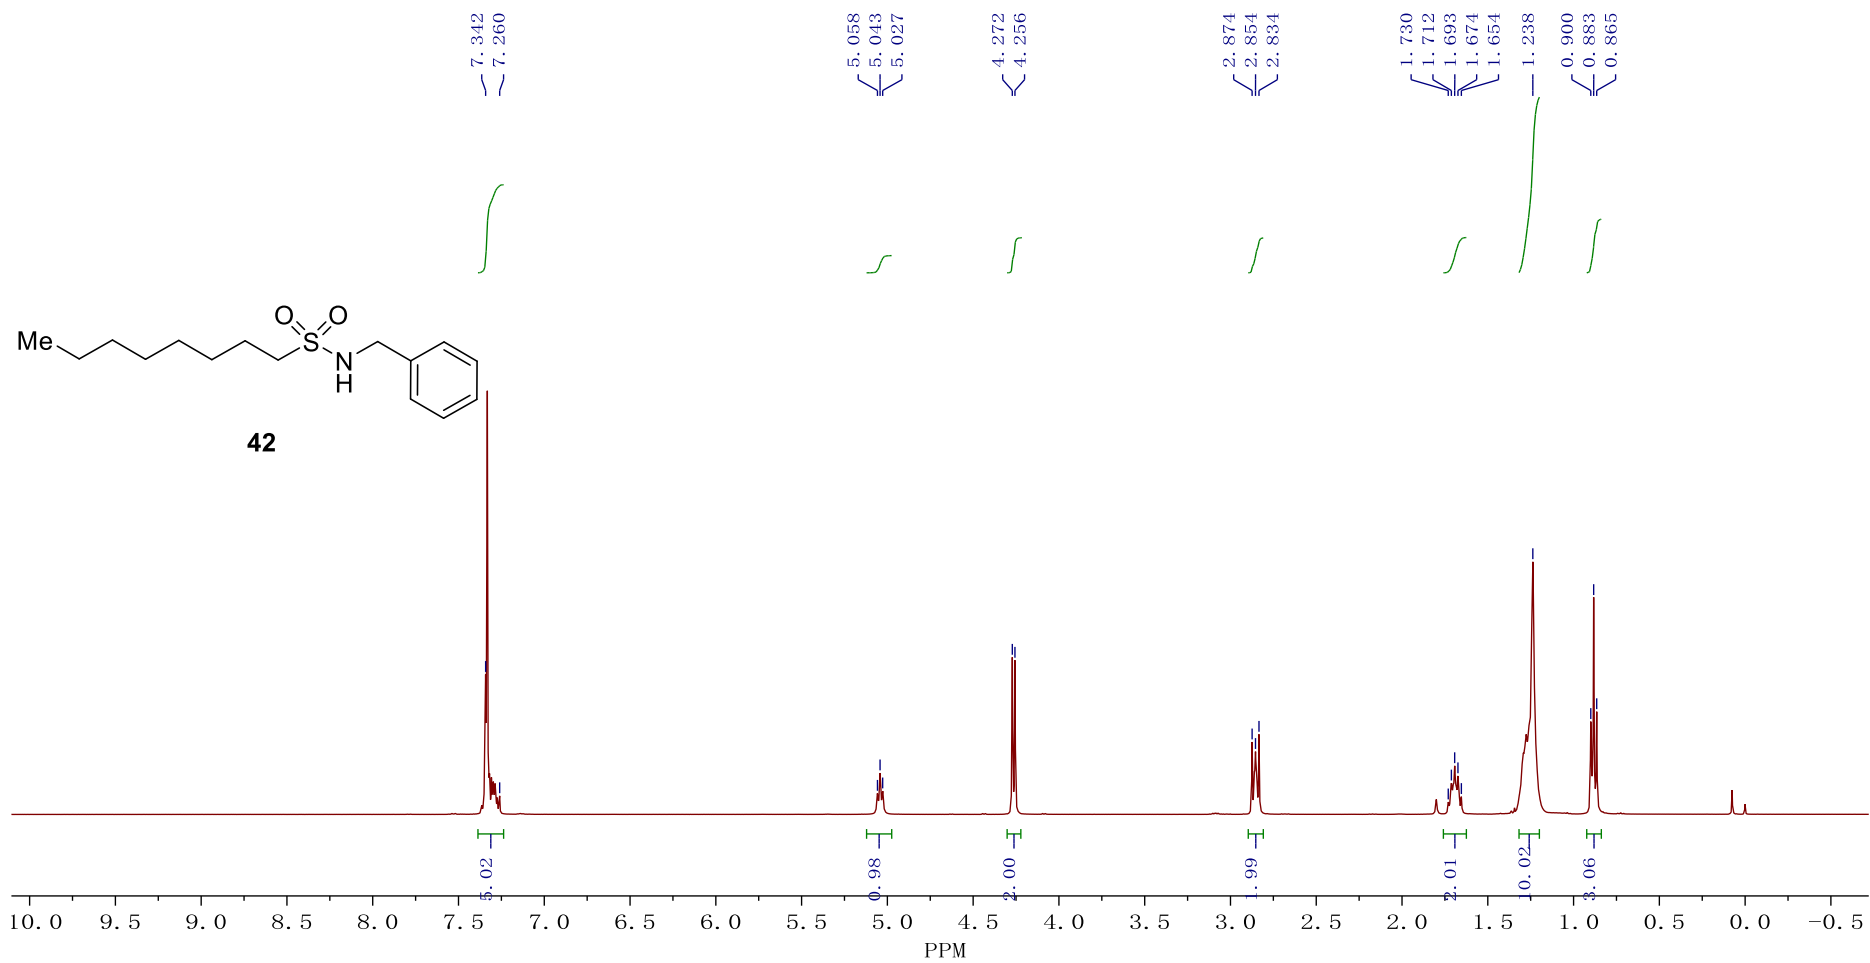

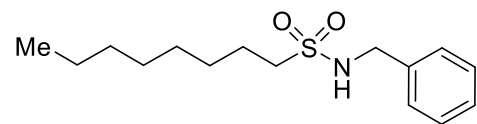

42

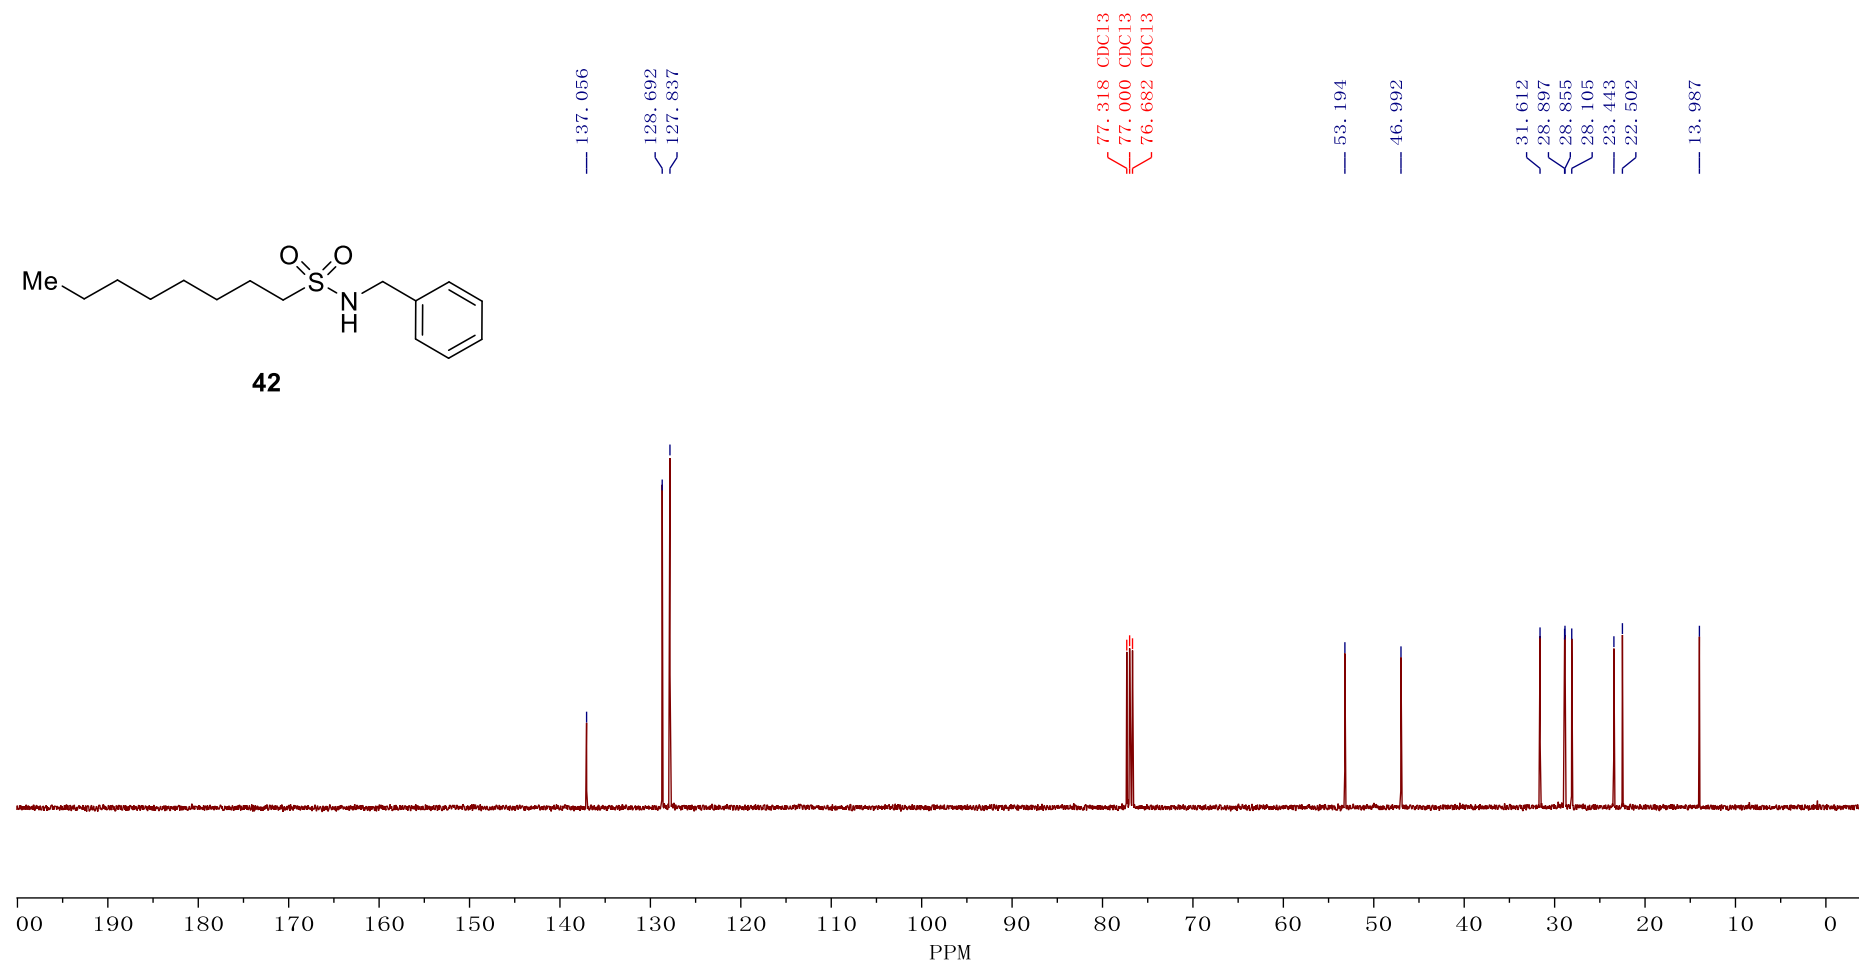

S134

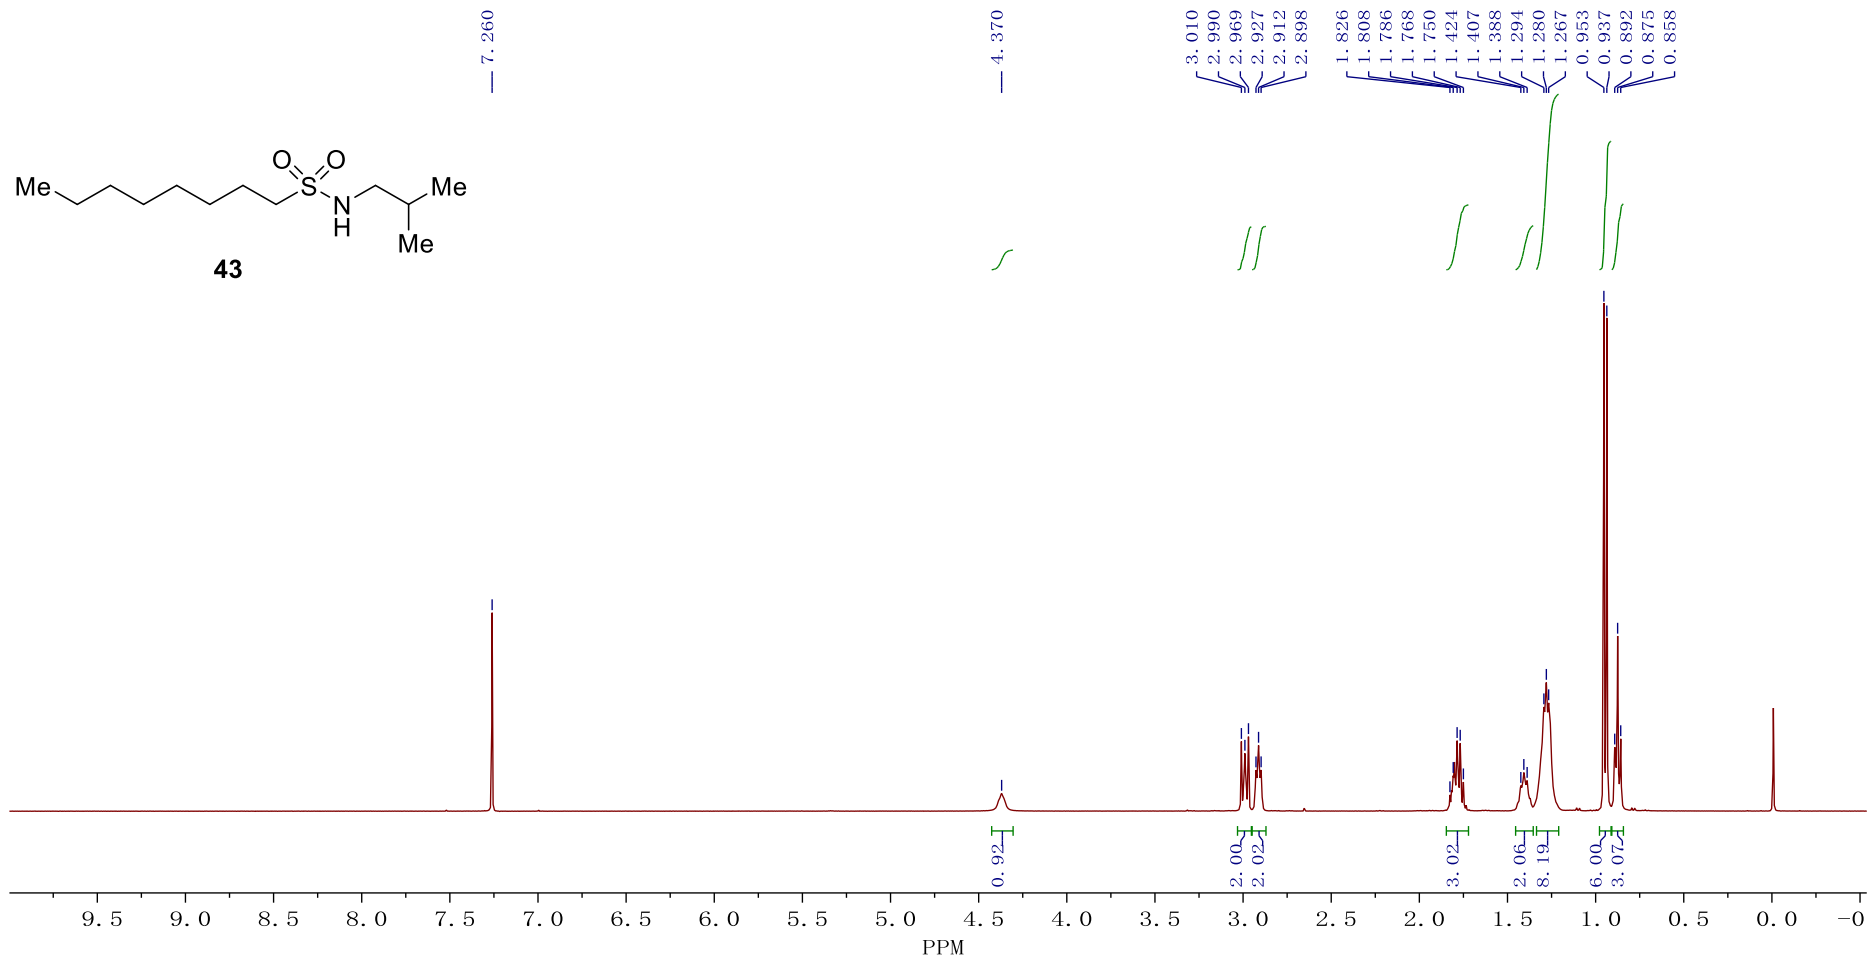

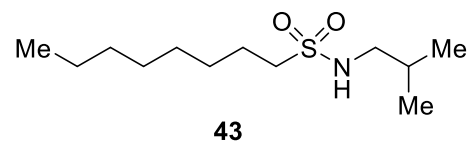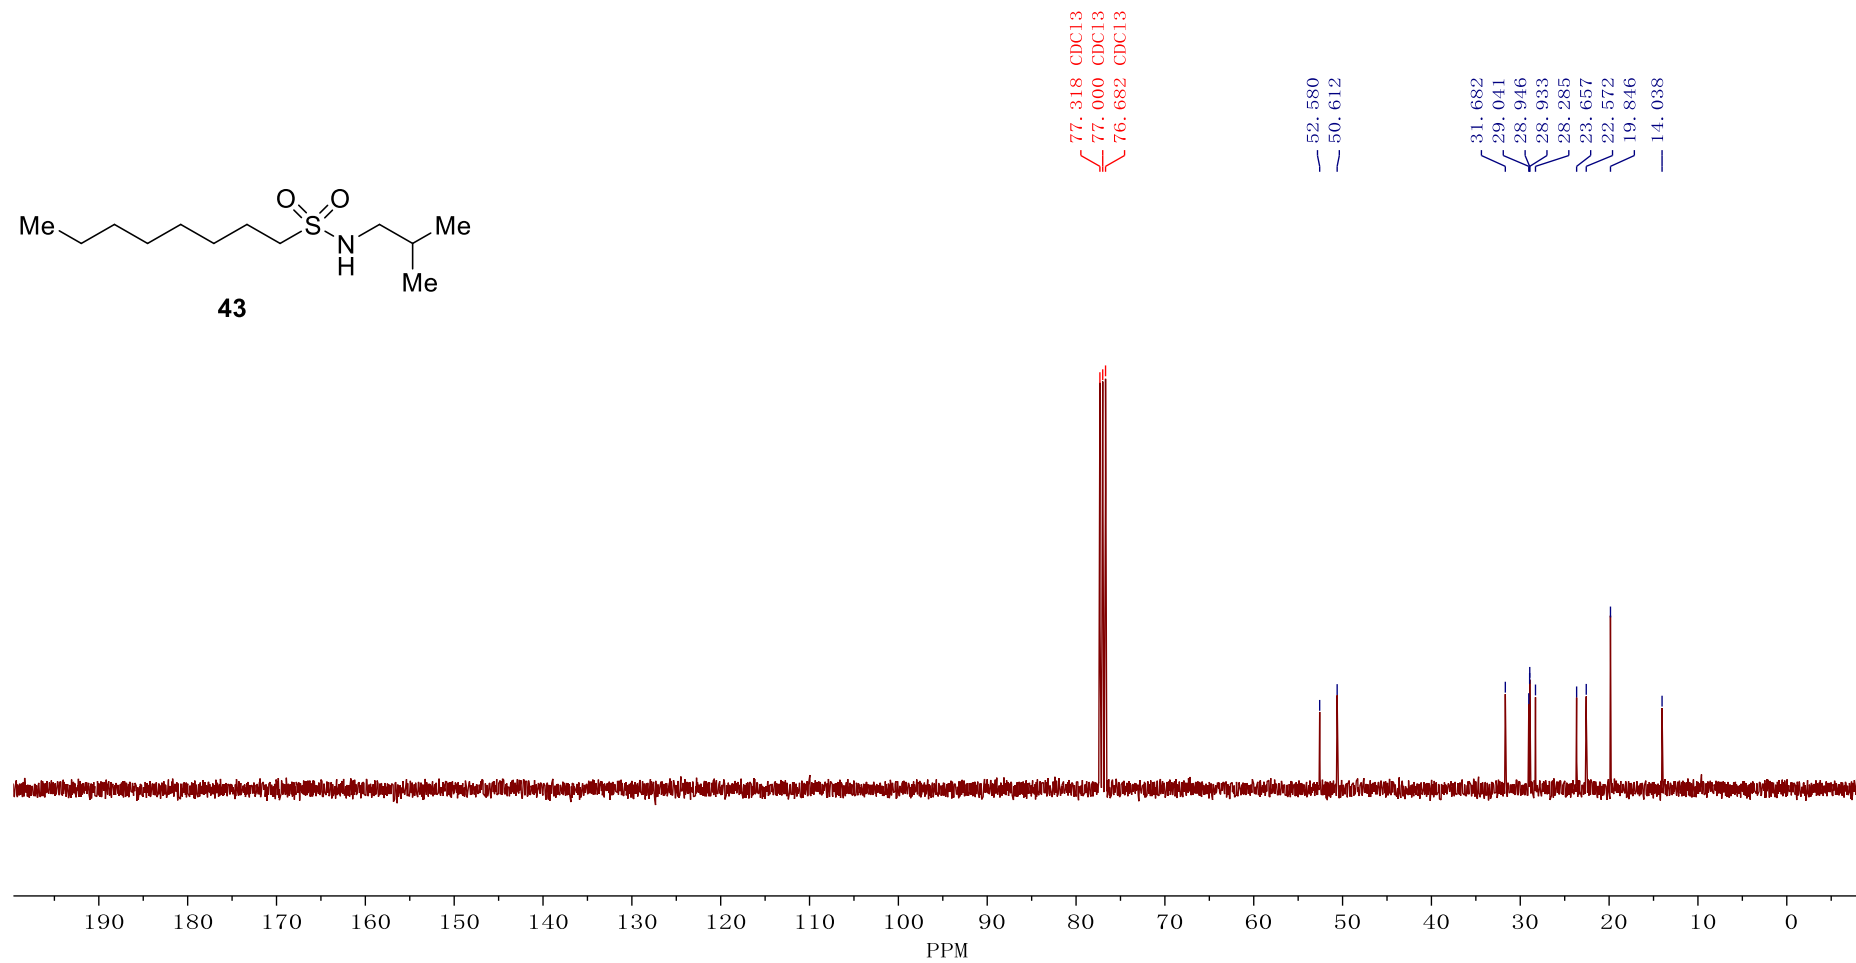



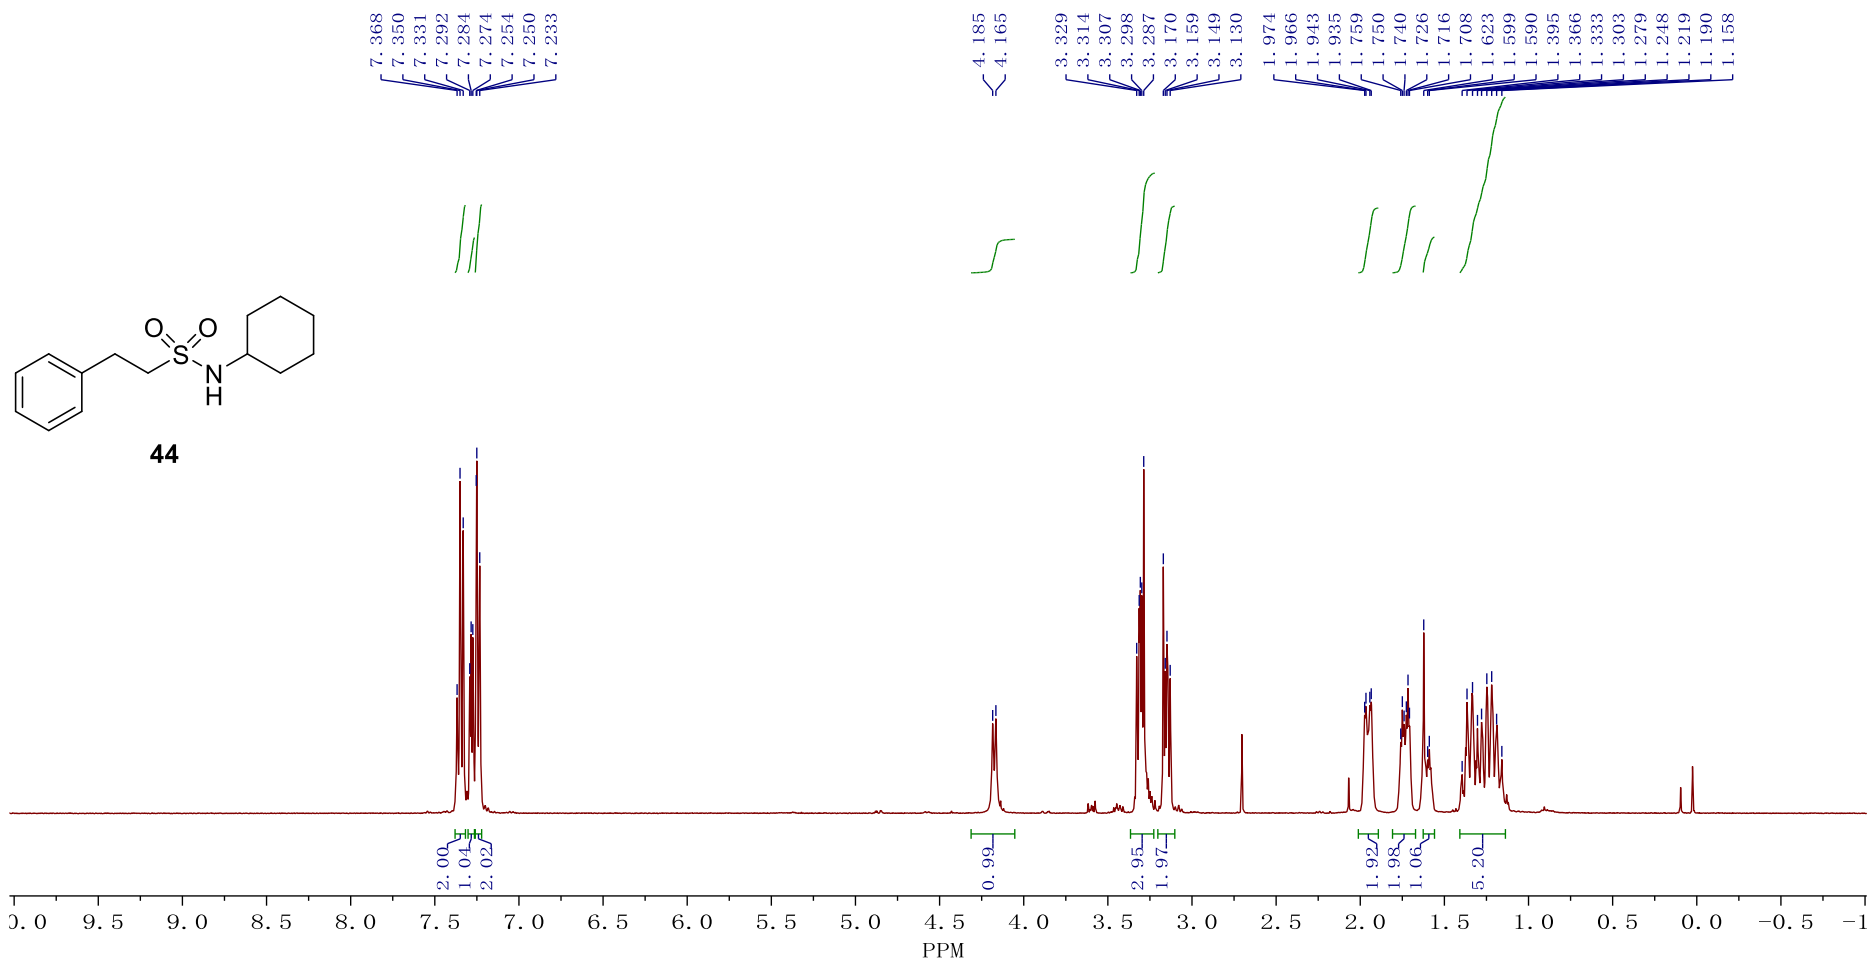

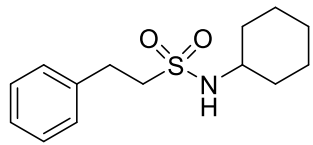

44

— 138.064

— 128.884

— 128.432

— 126.928

— 55.425

— 52.827

— 34.561

— 30.233

— 25.142

— 24.789

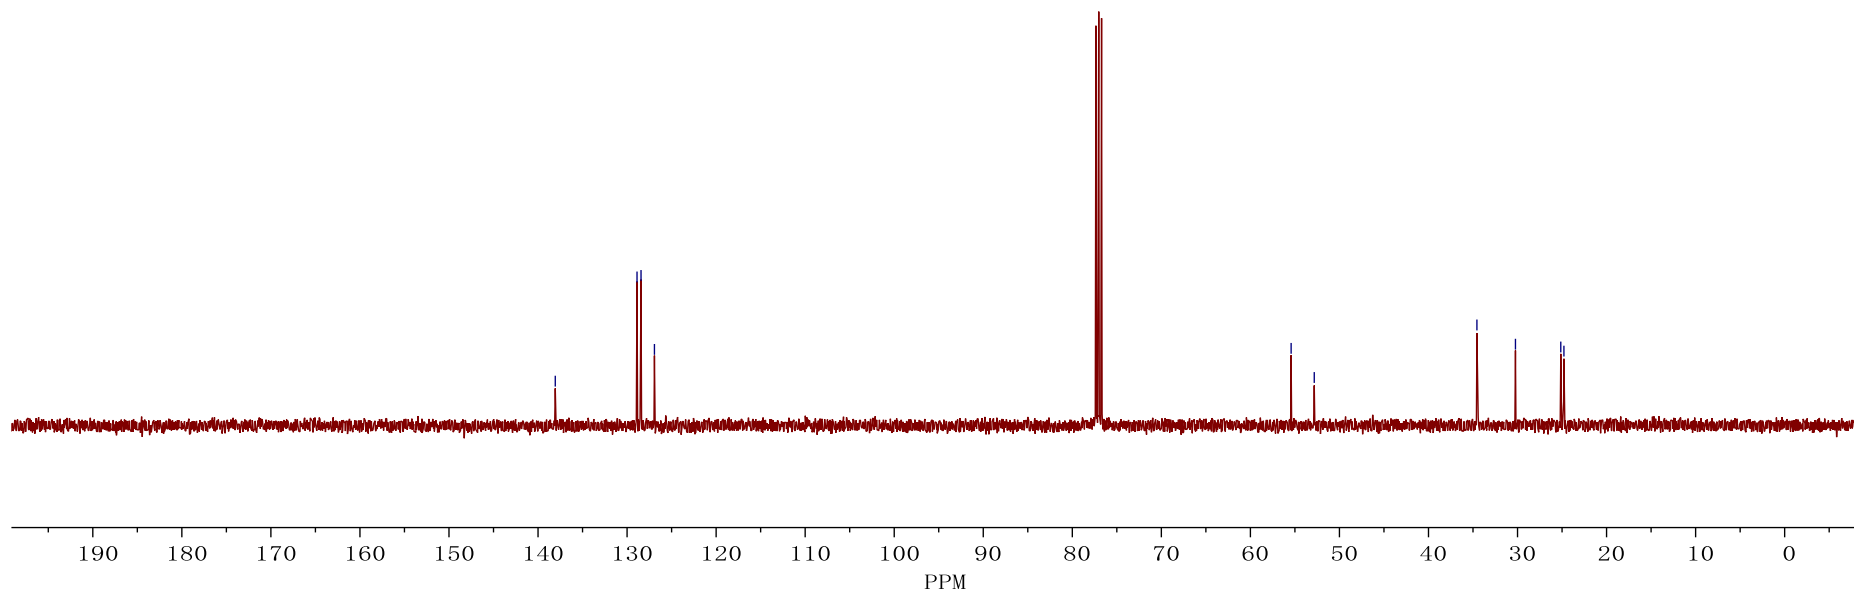

S138

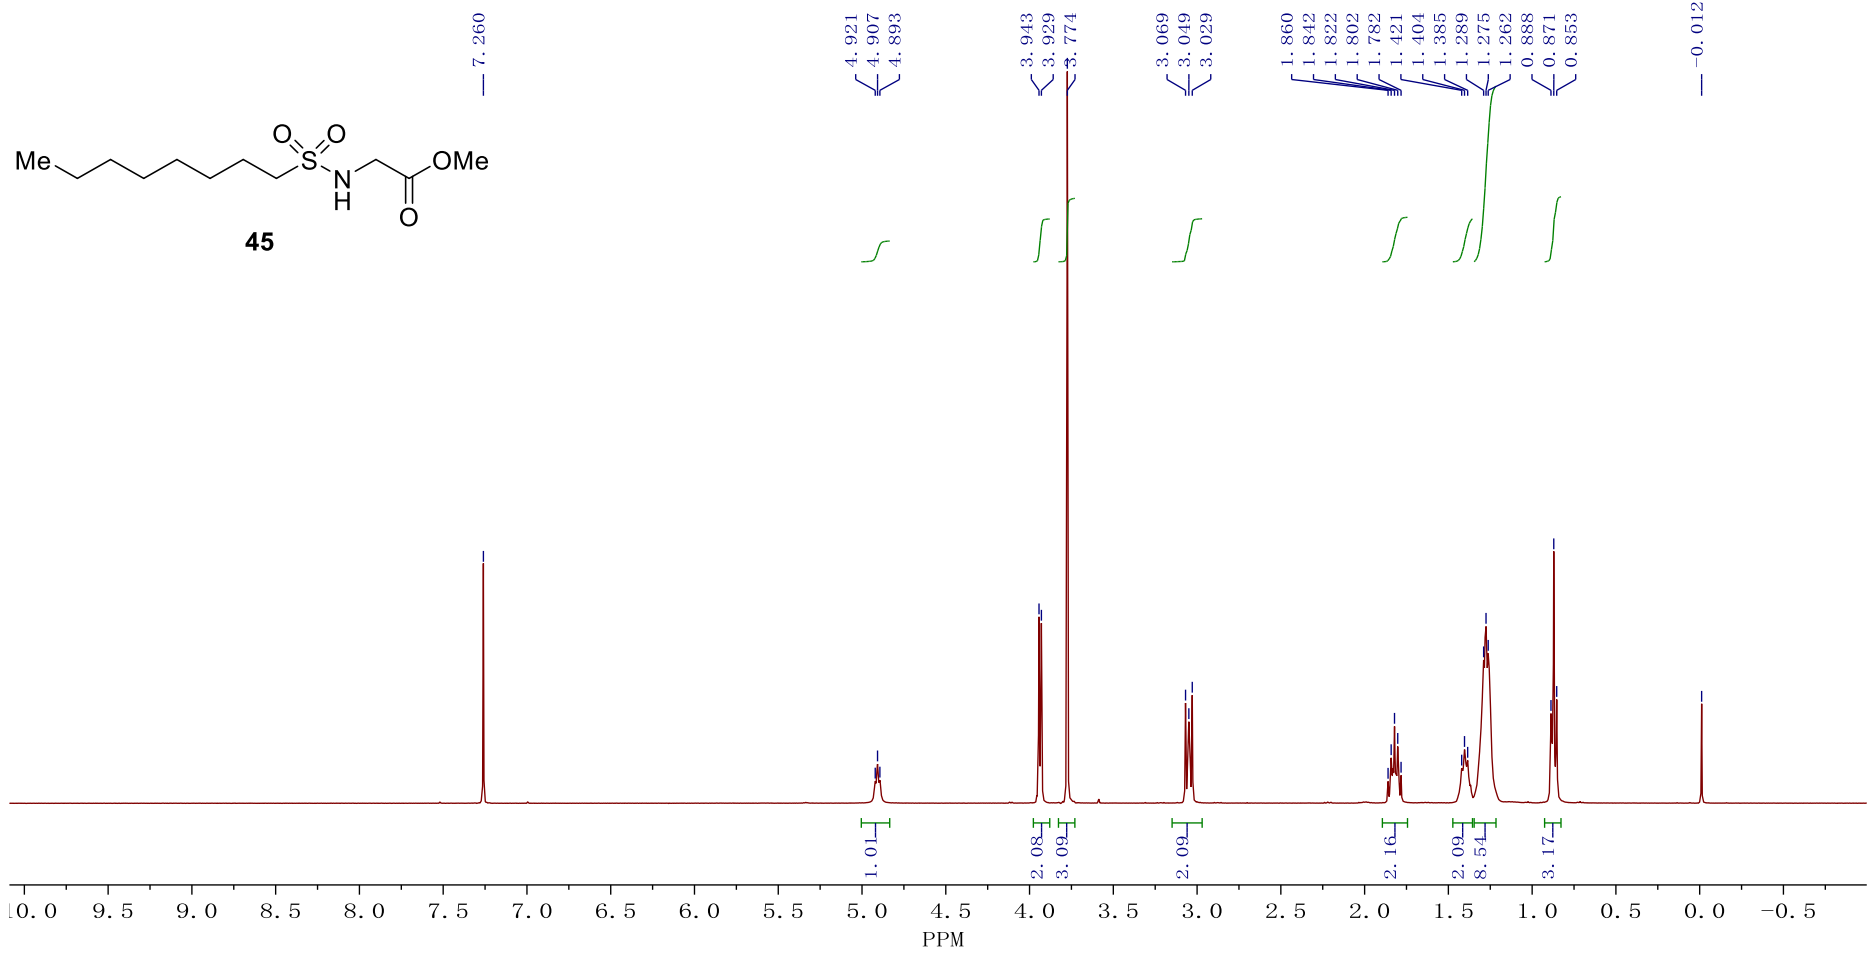

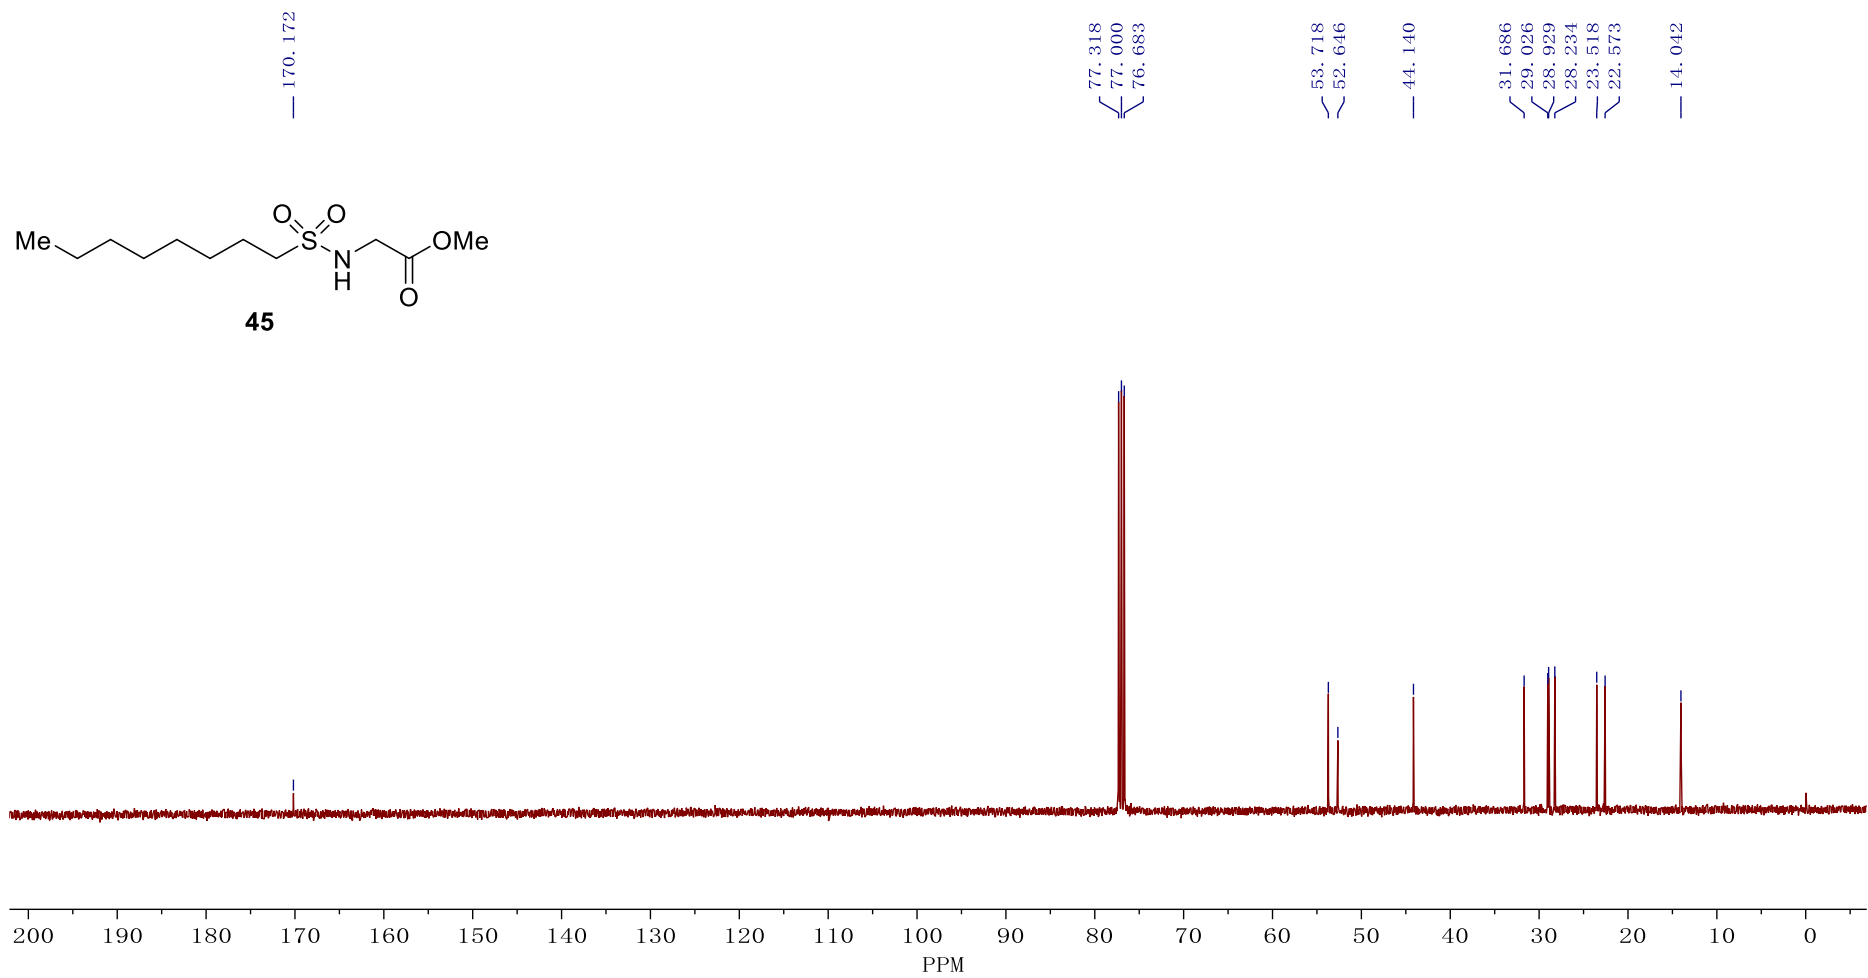

S140

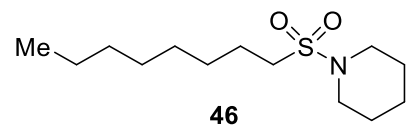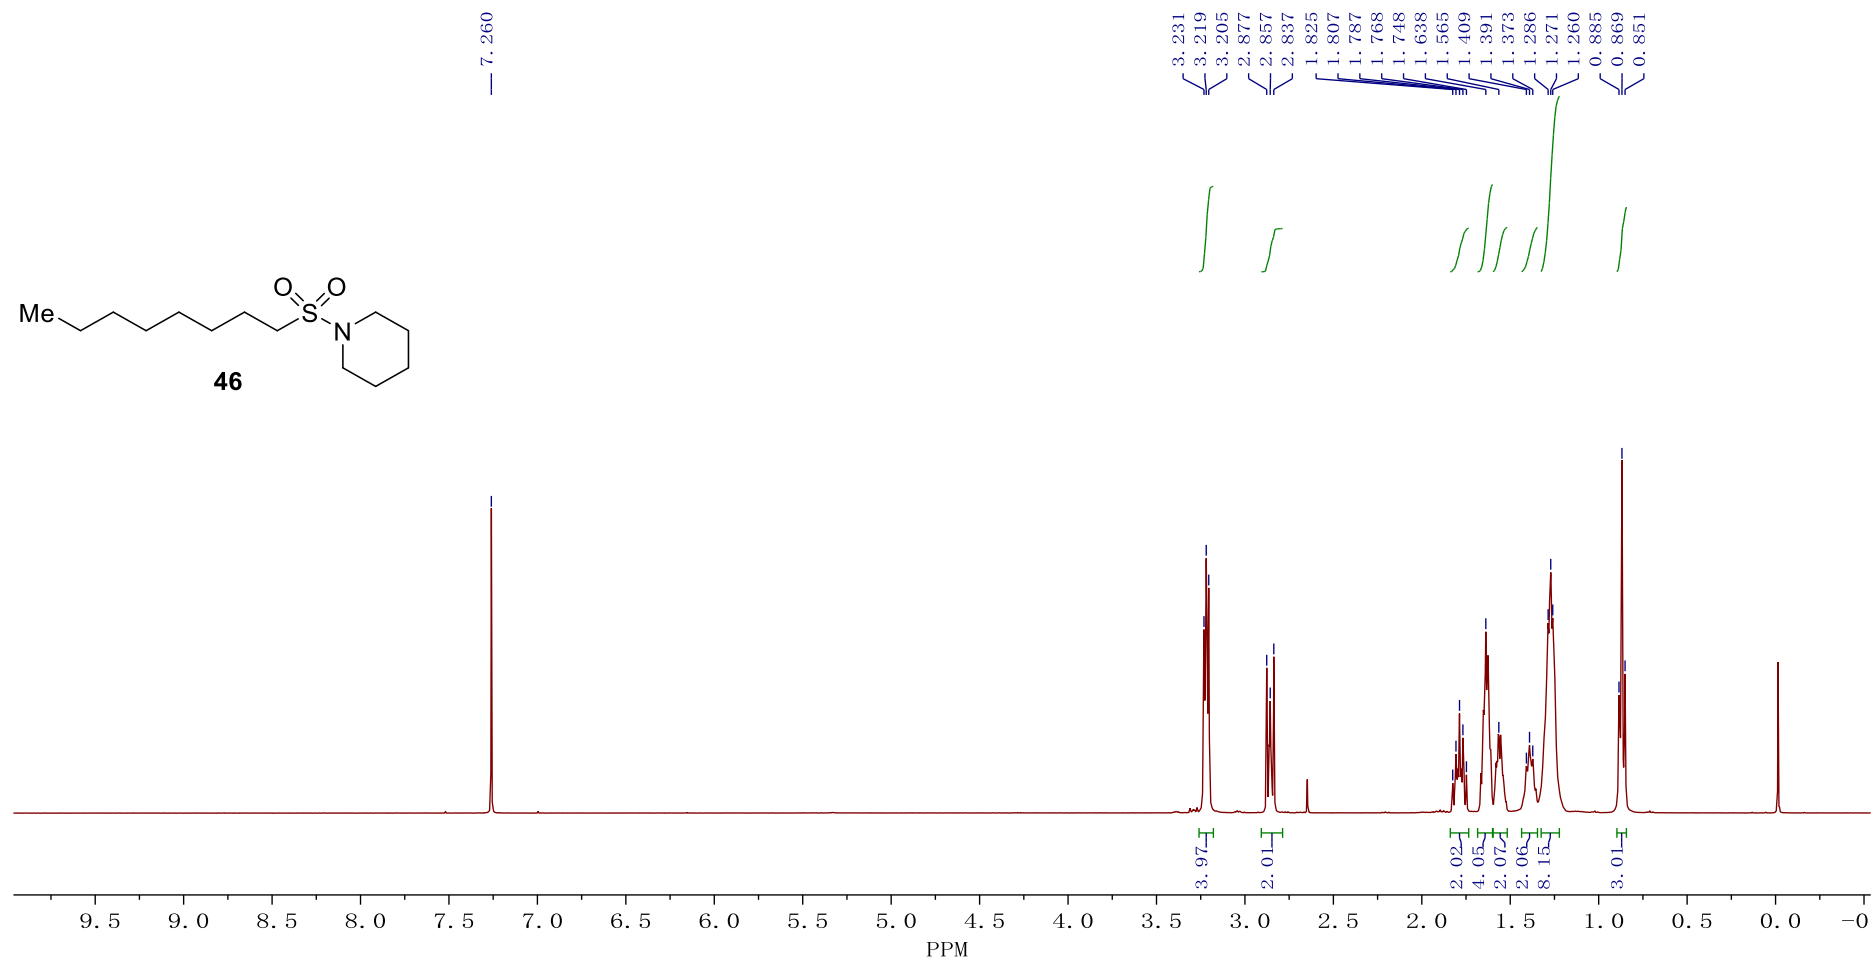

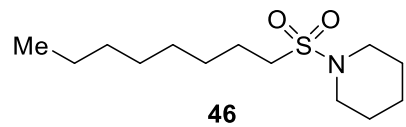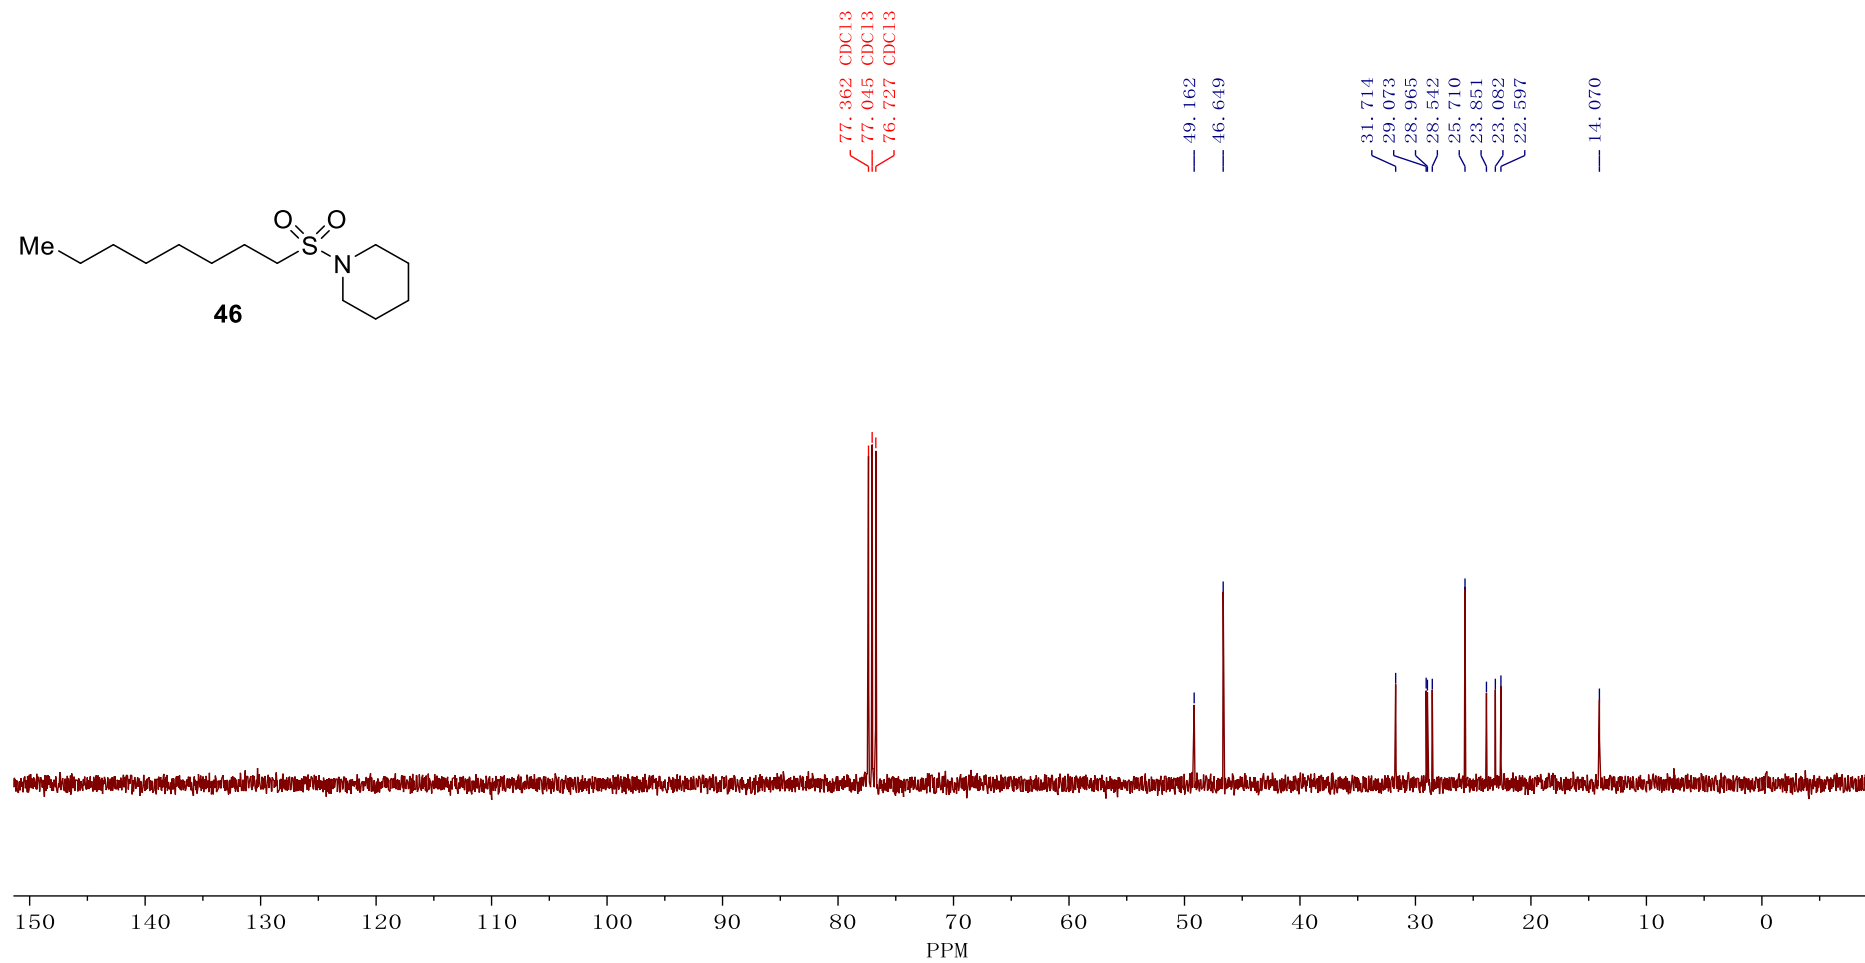

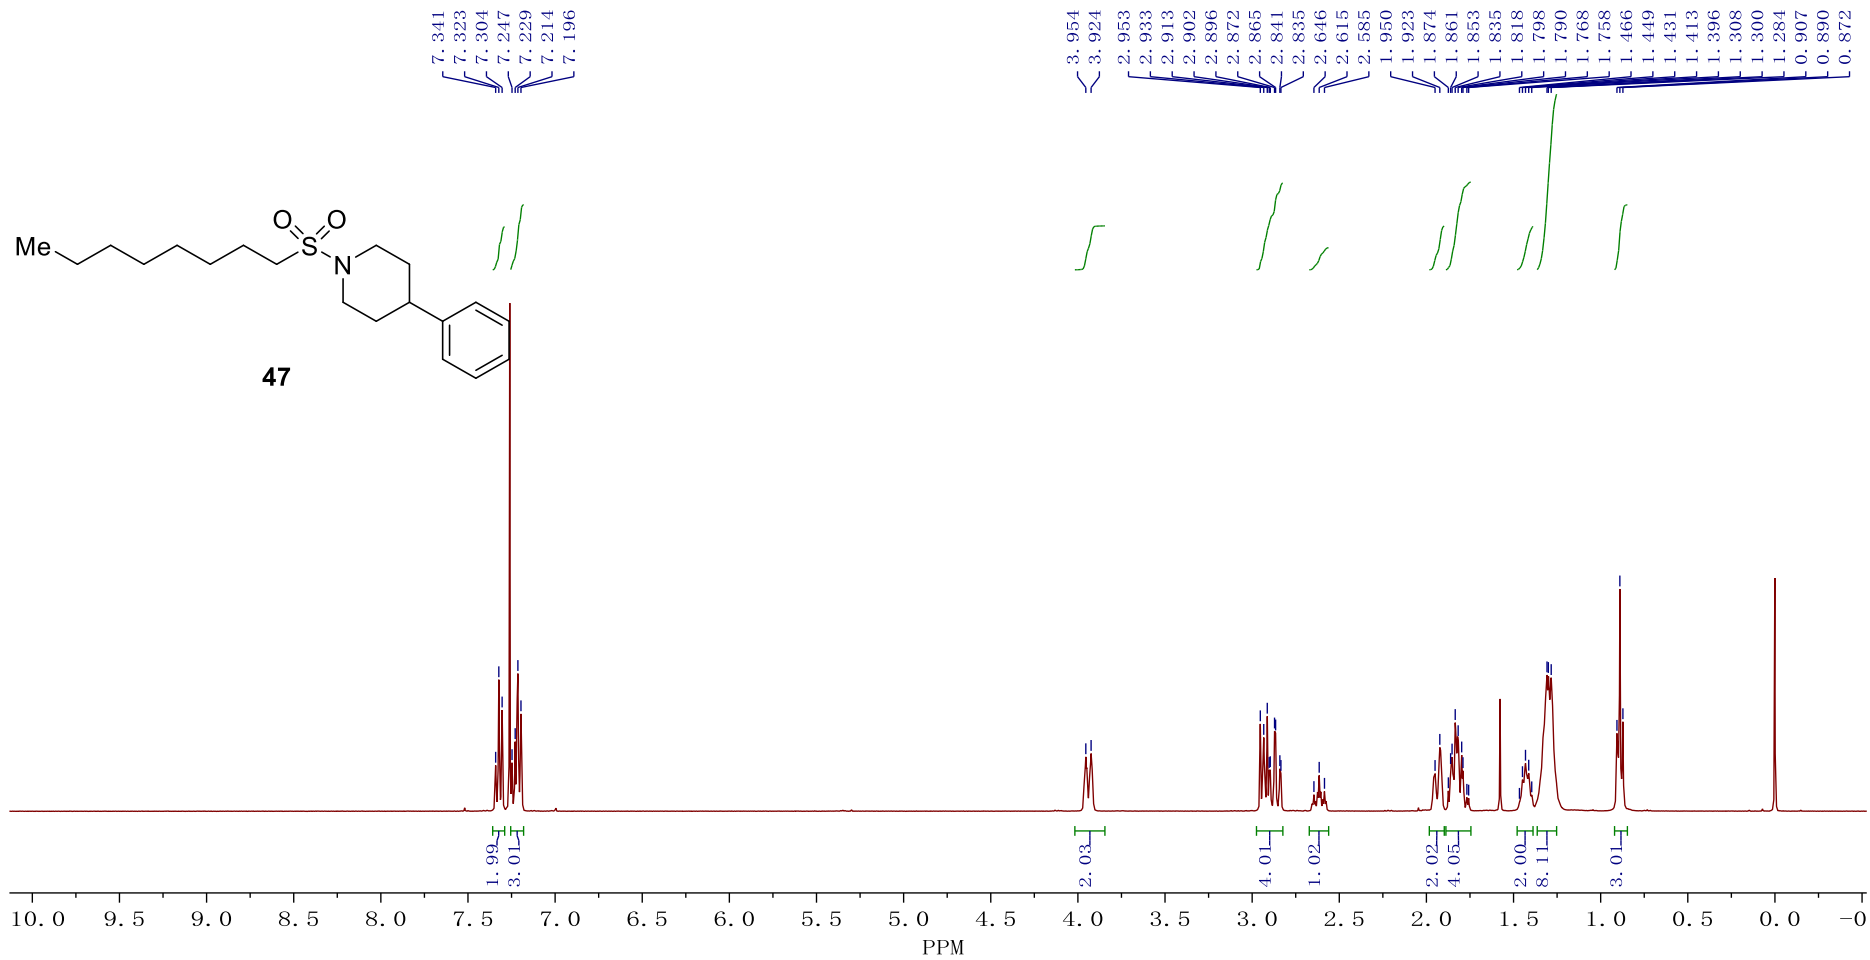

S143

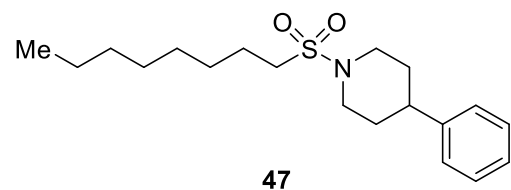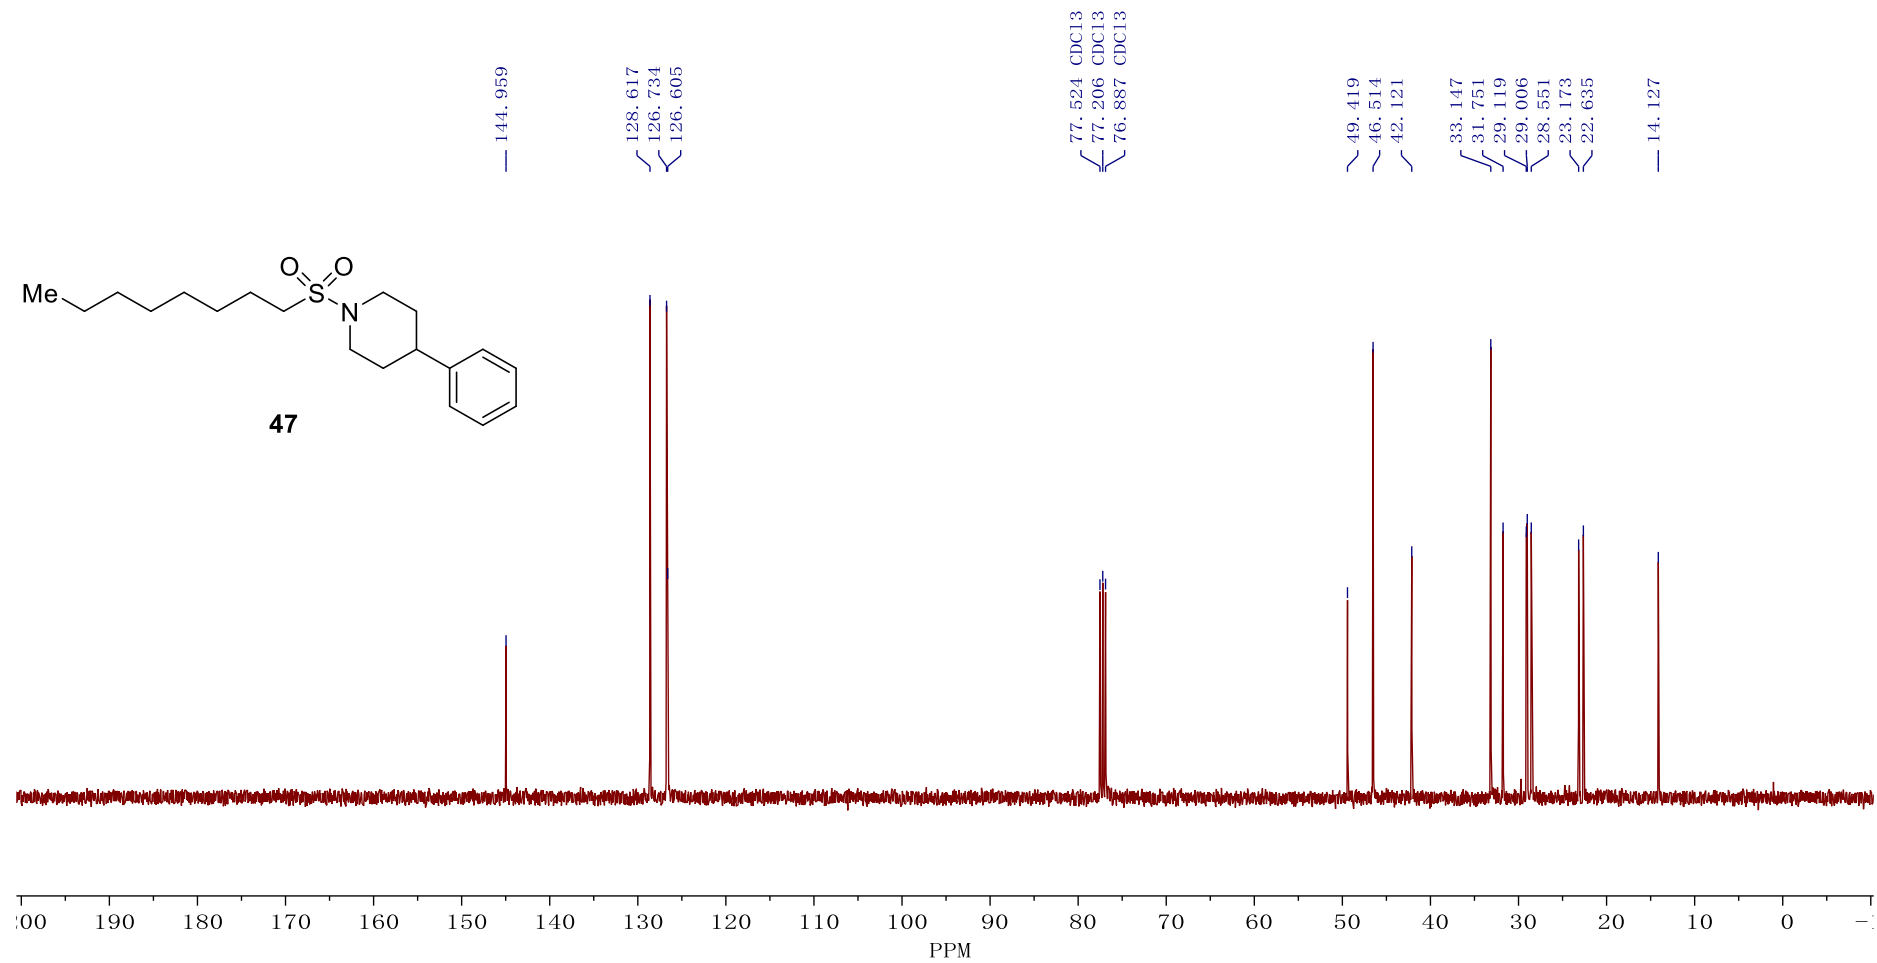



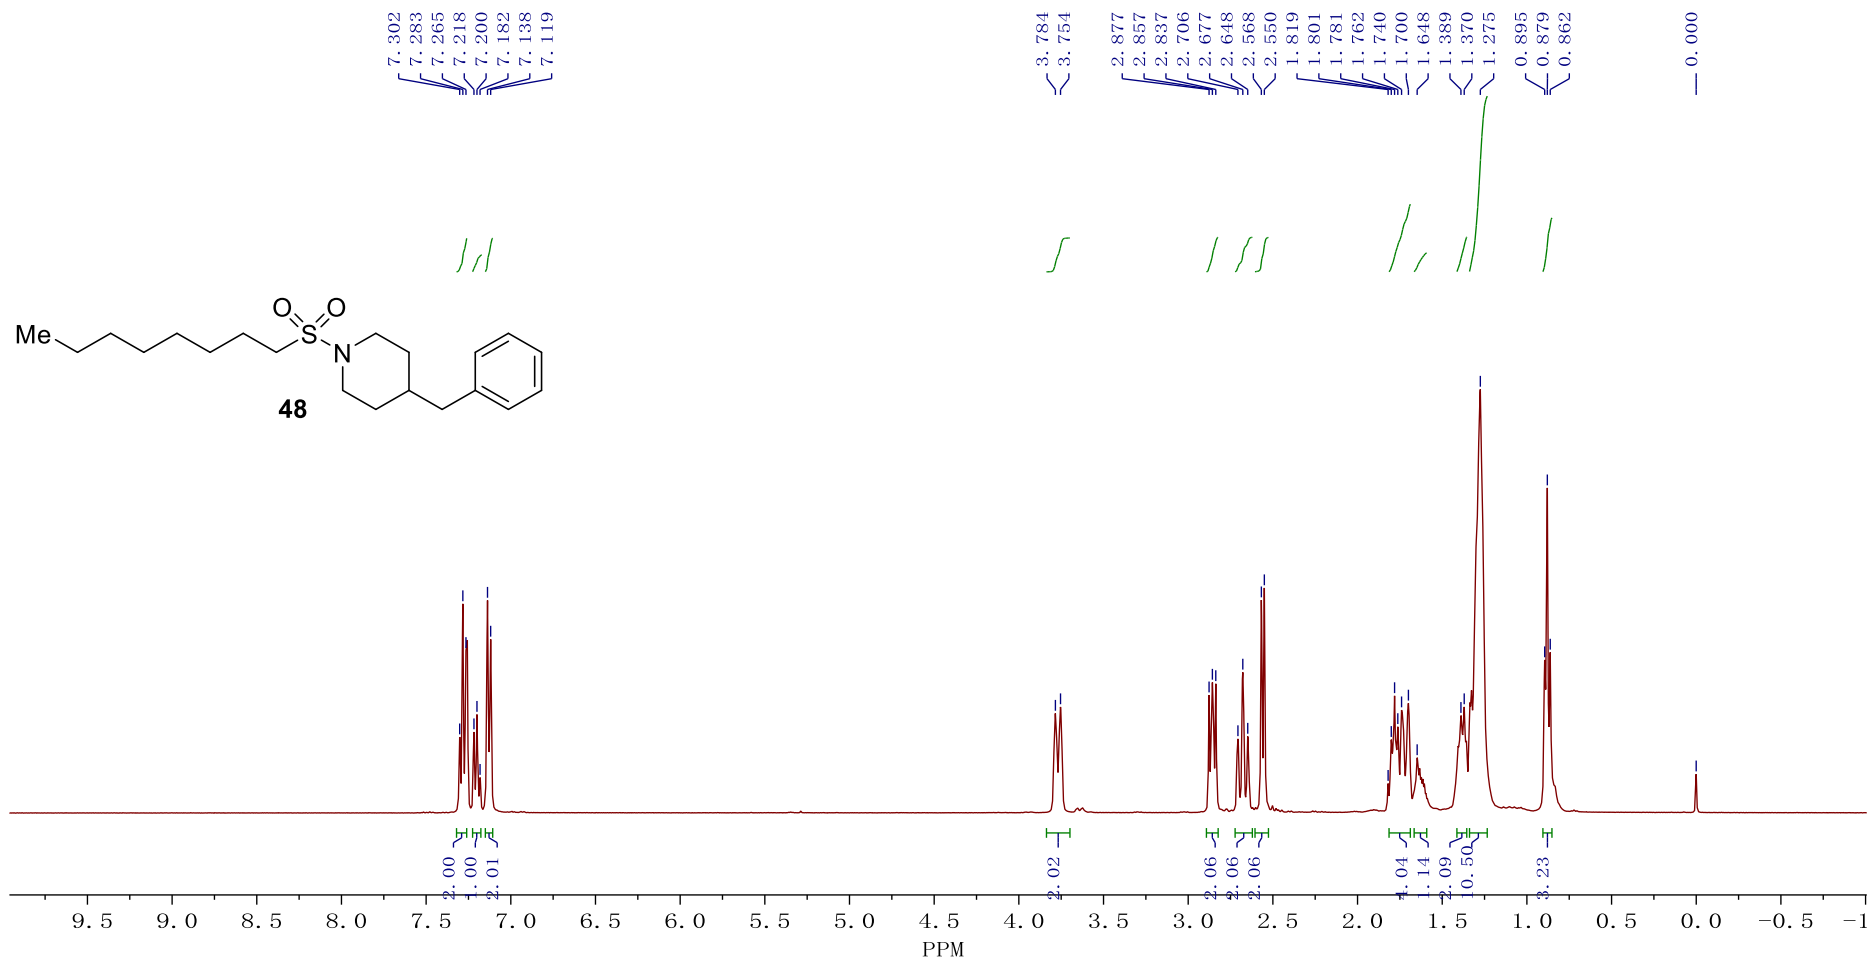

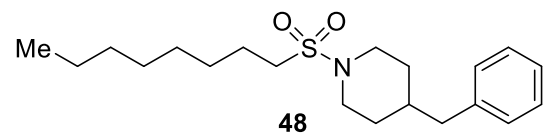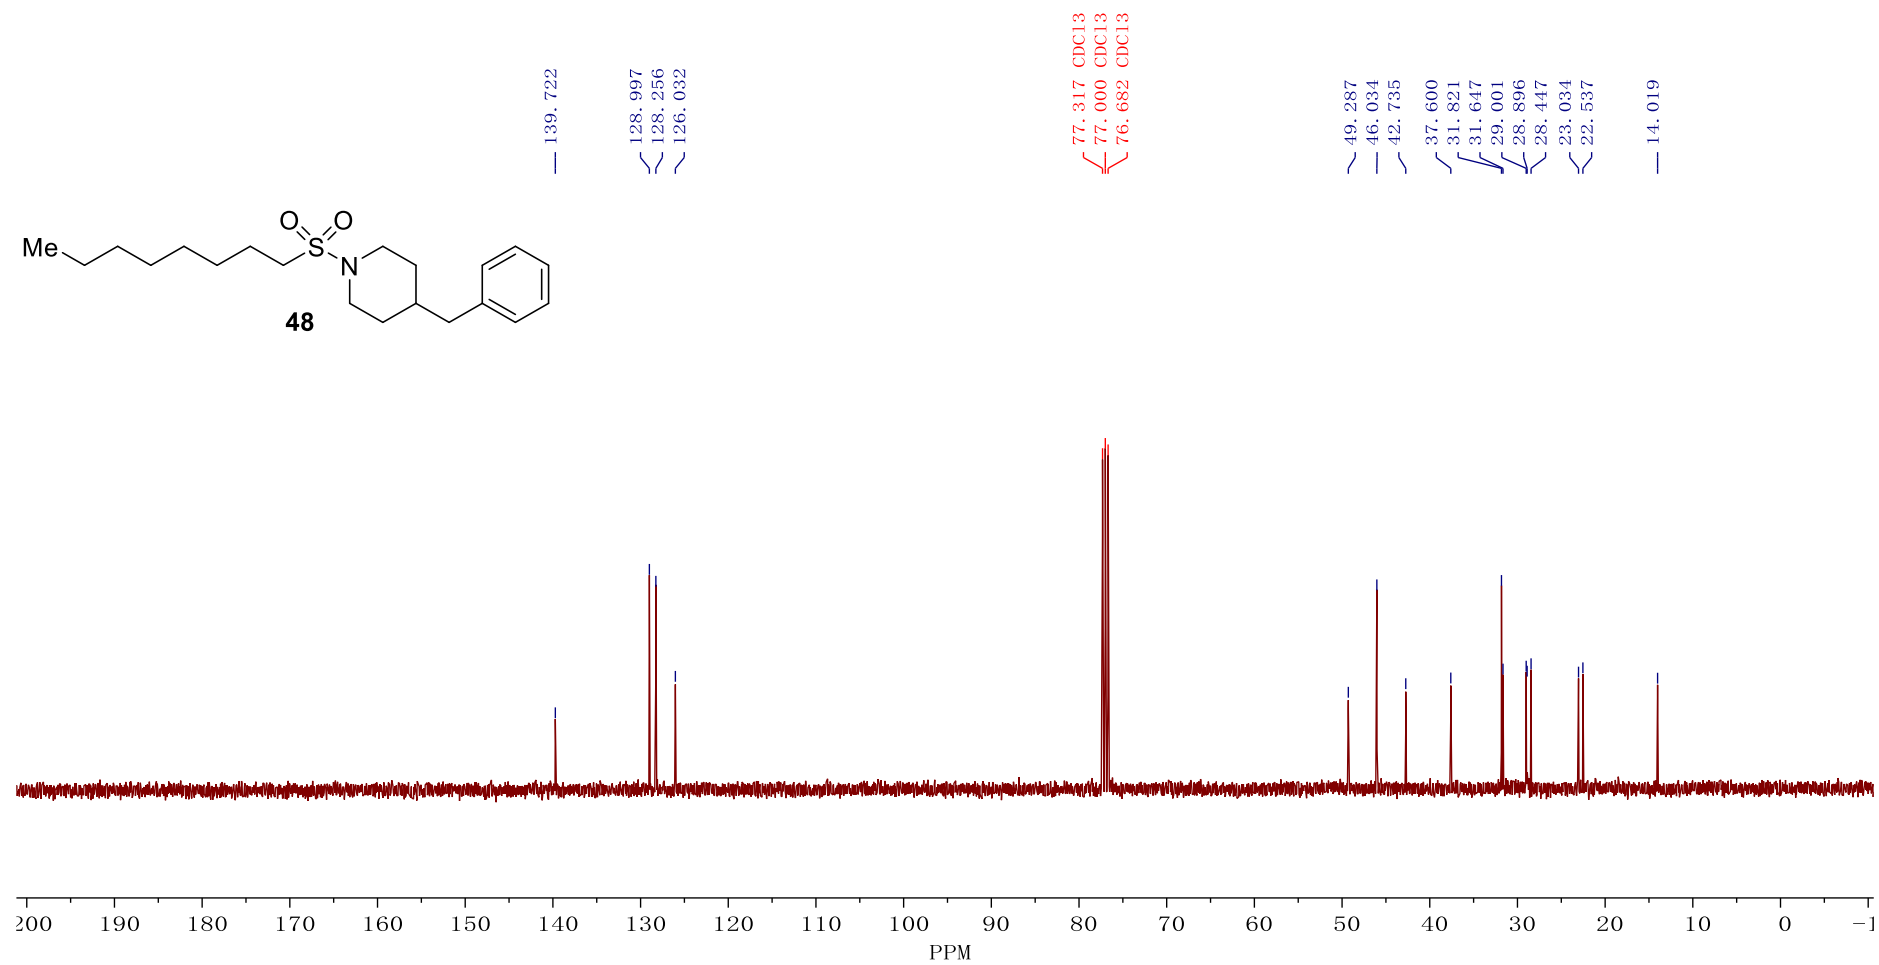

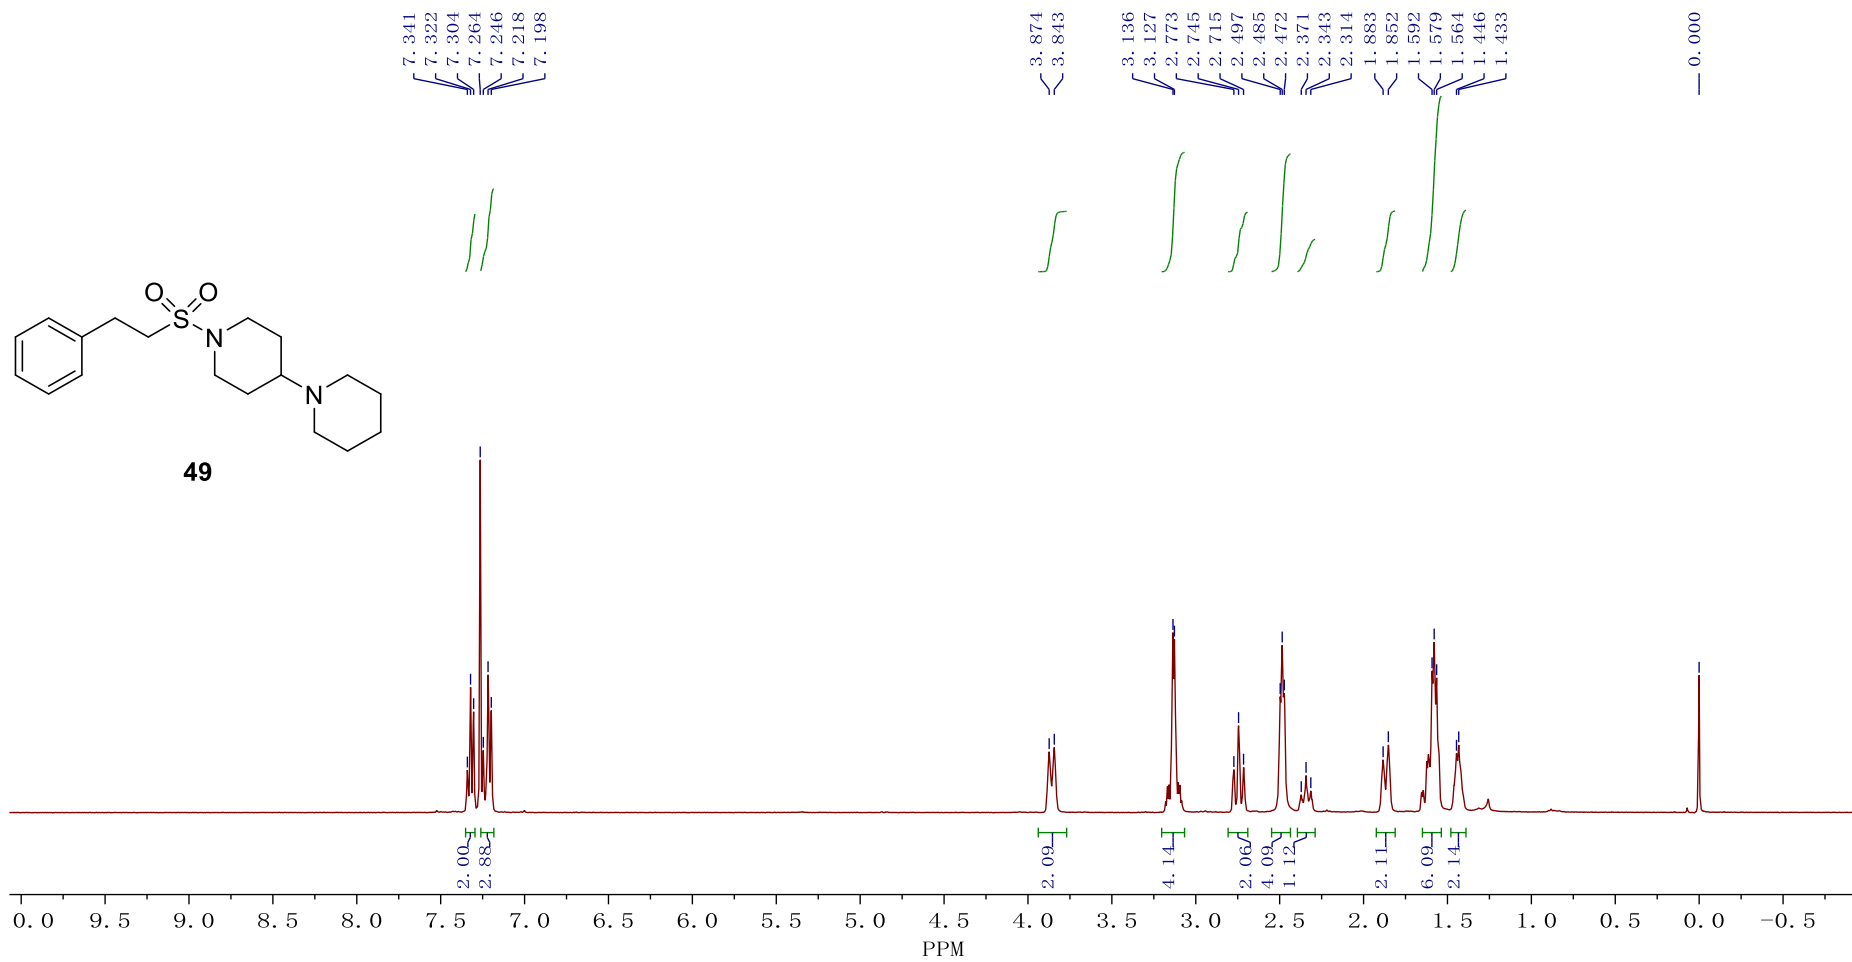

S147

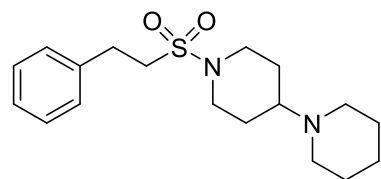

49

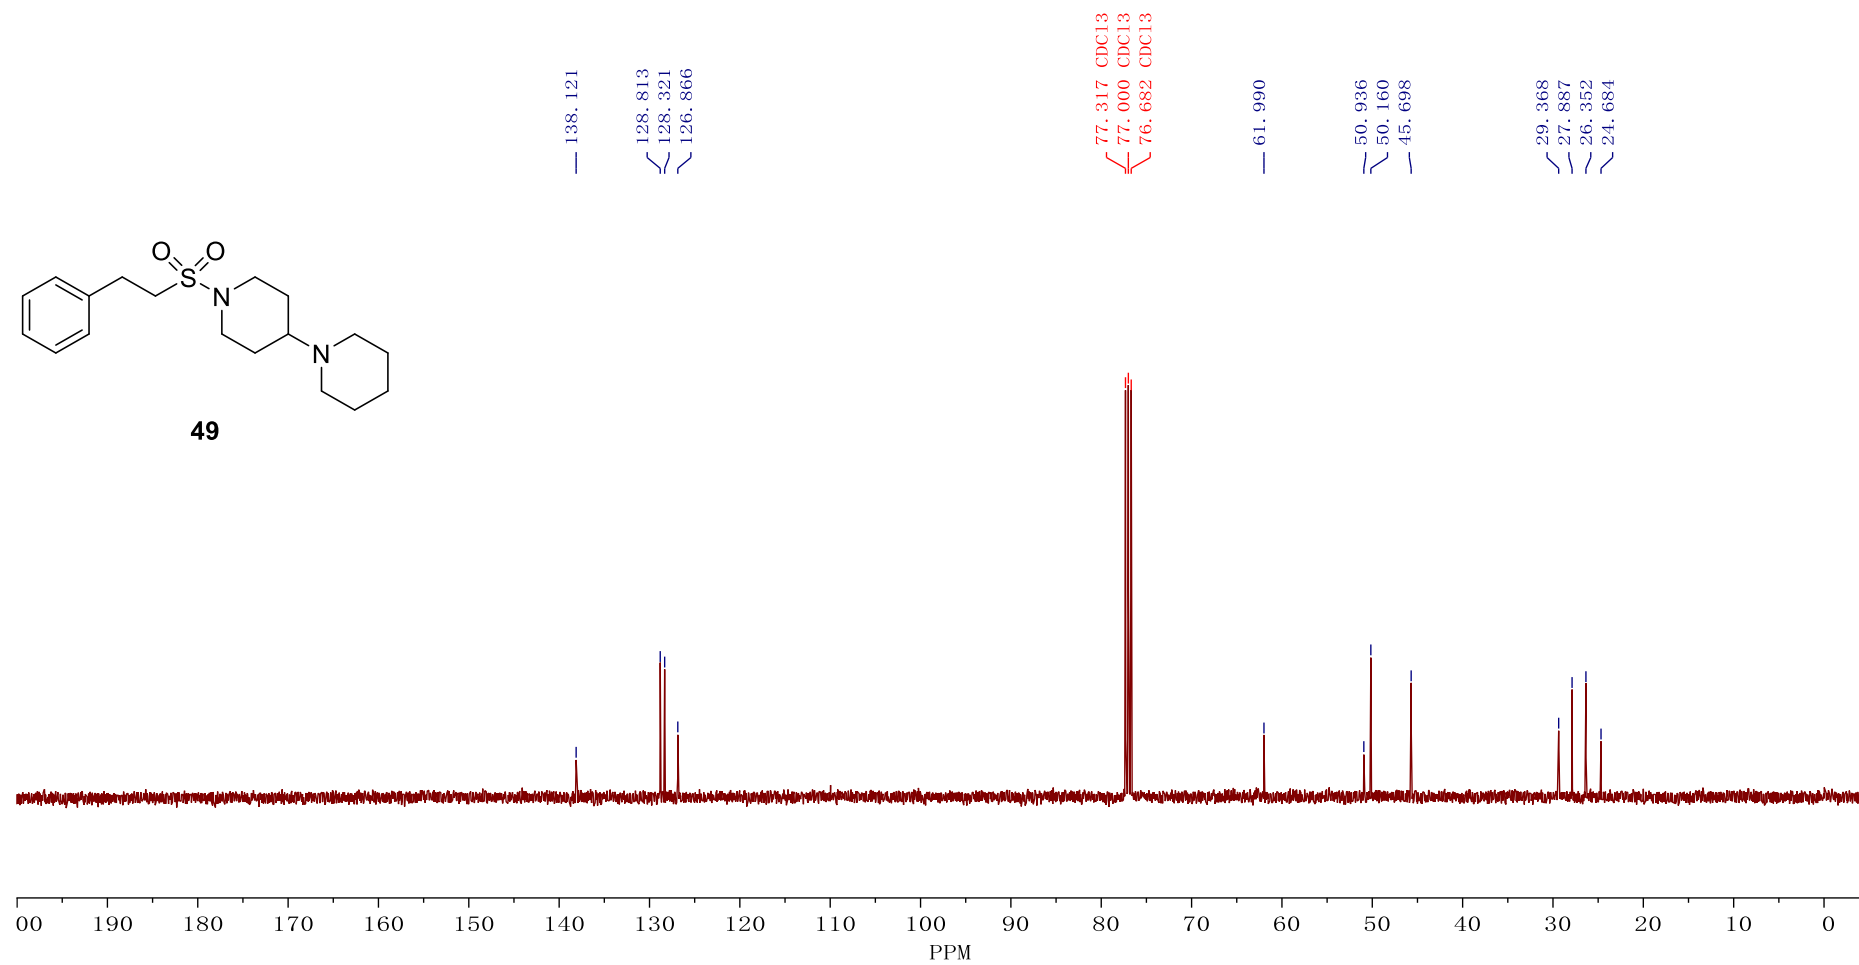

S148

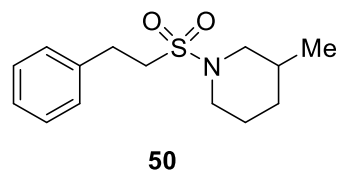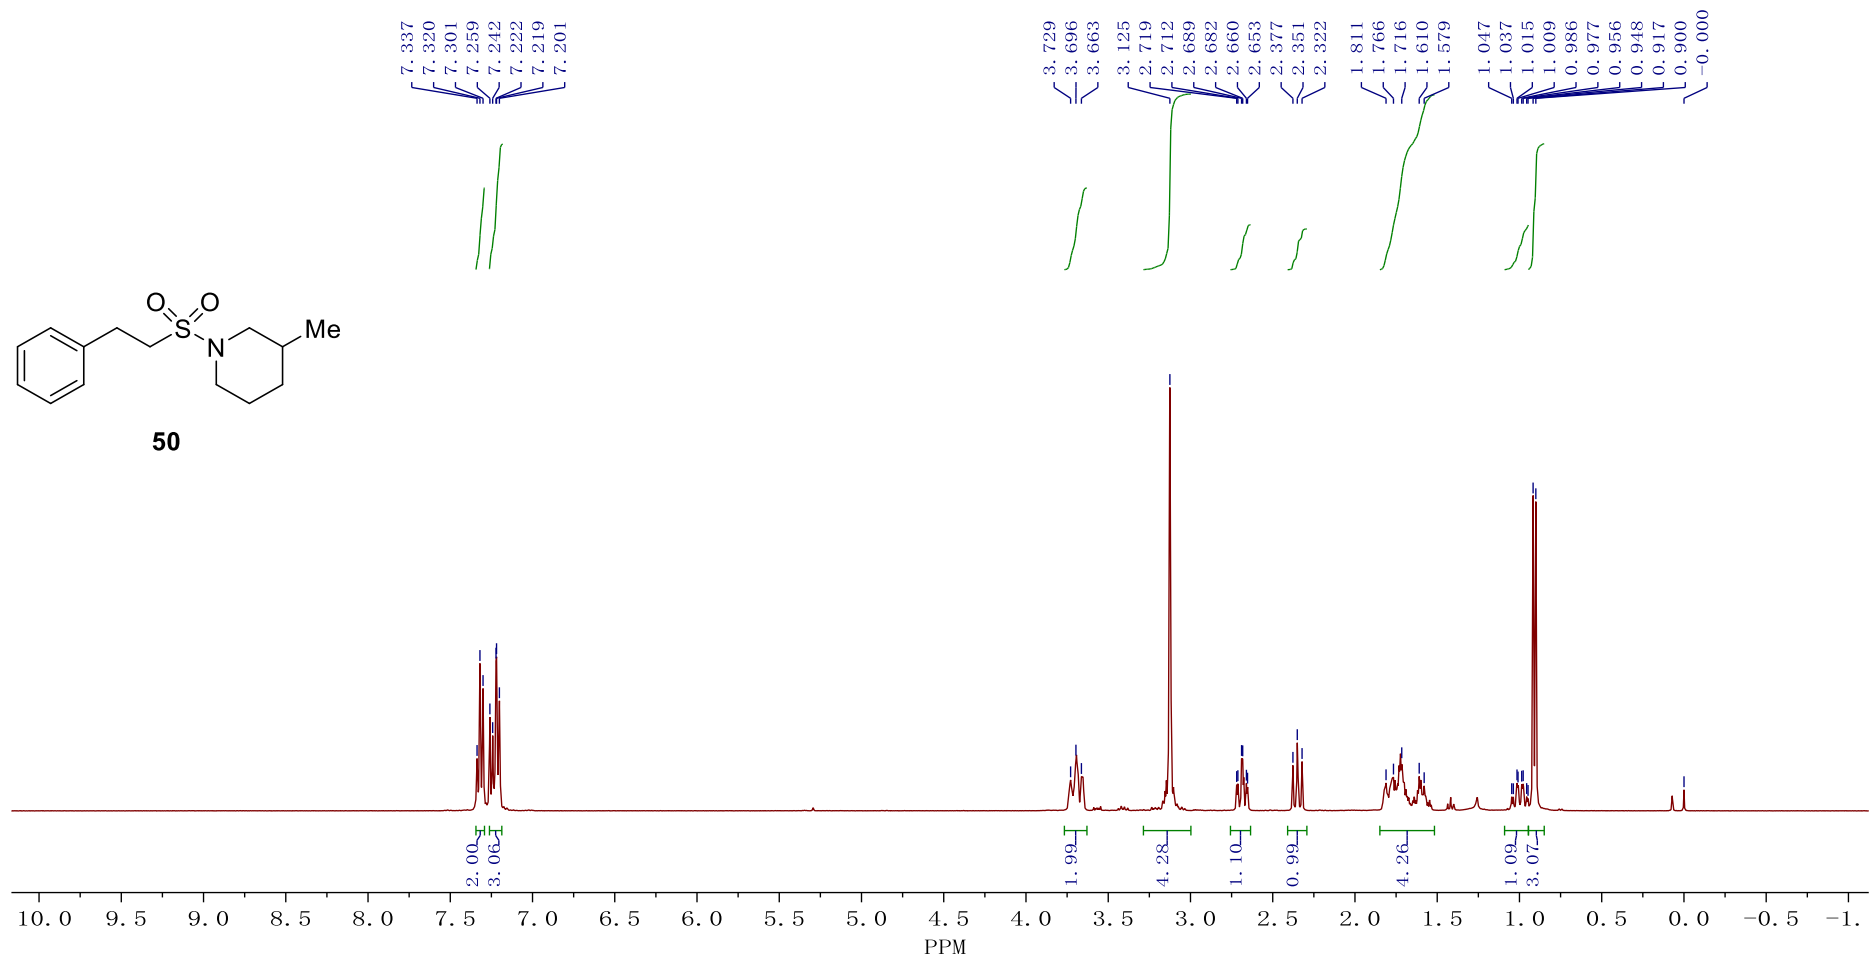

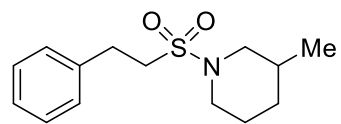

50

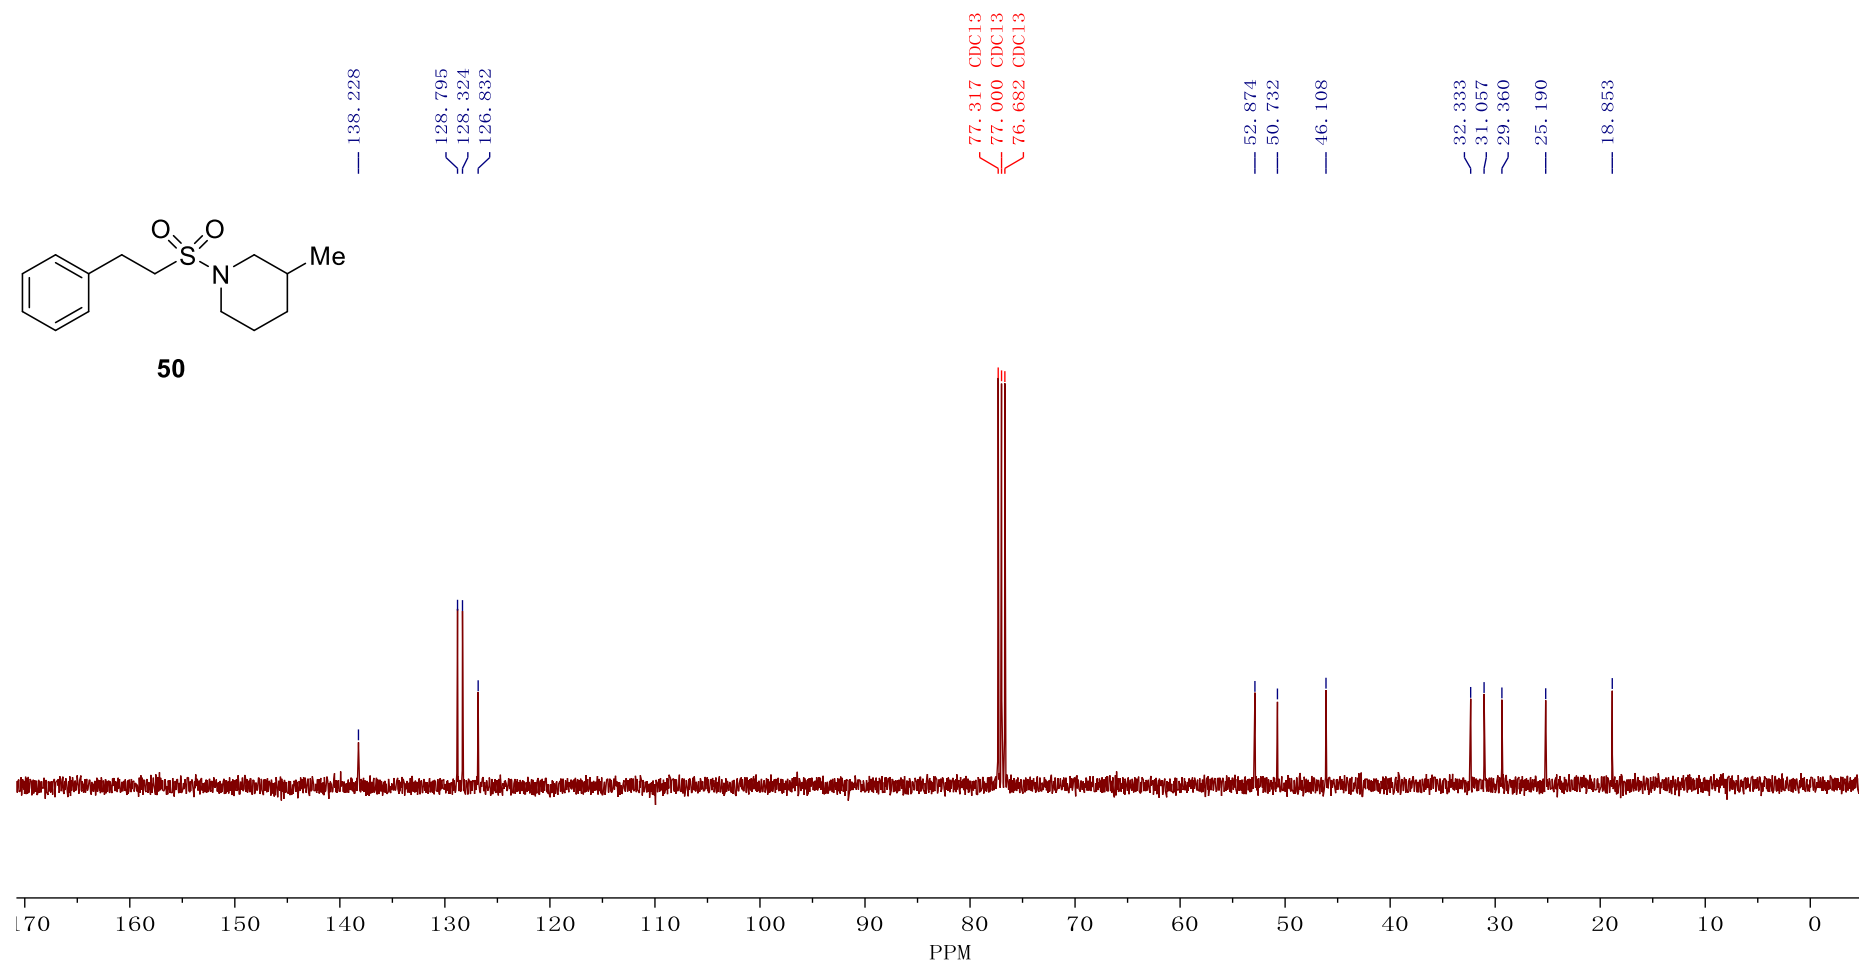

S150

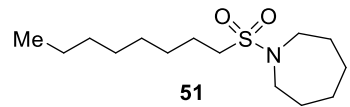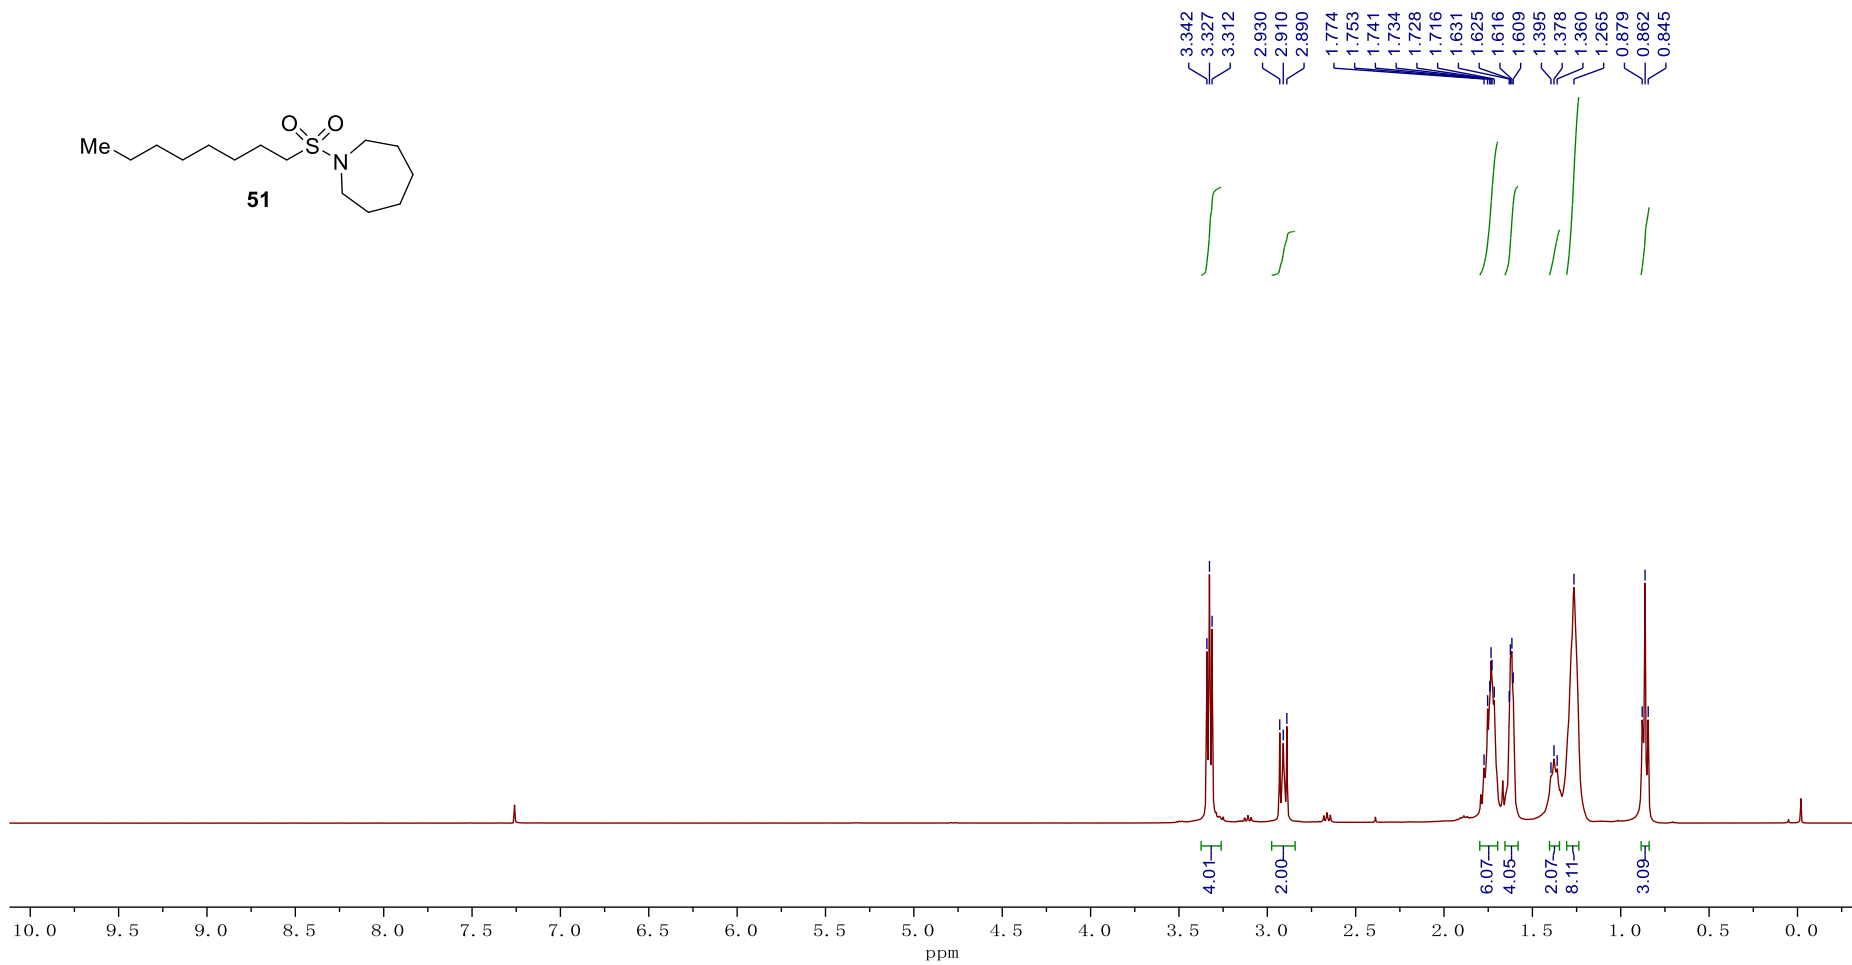

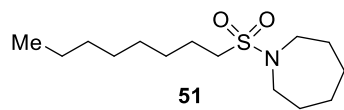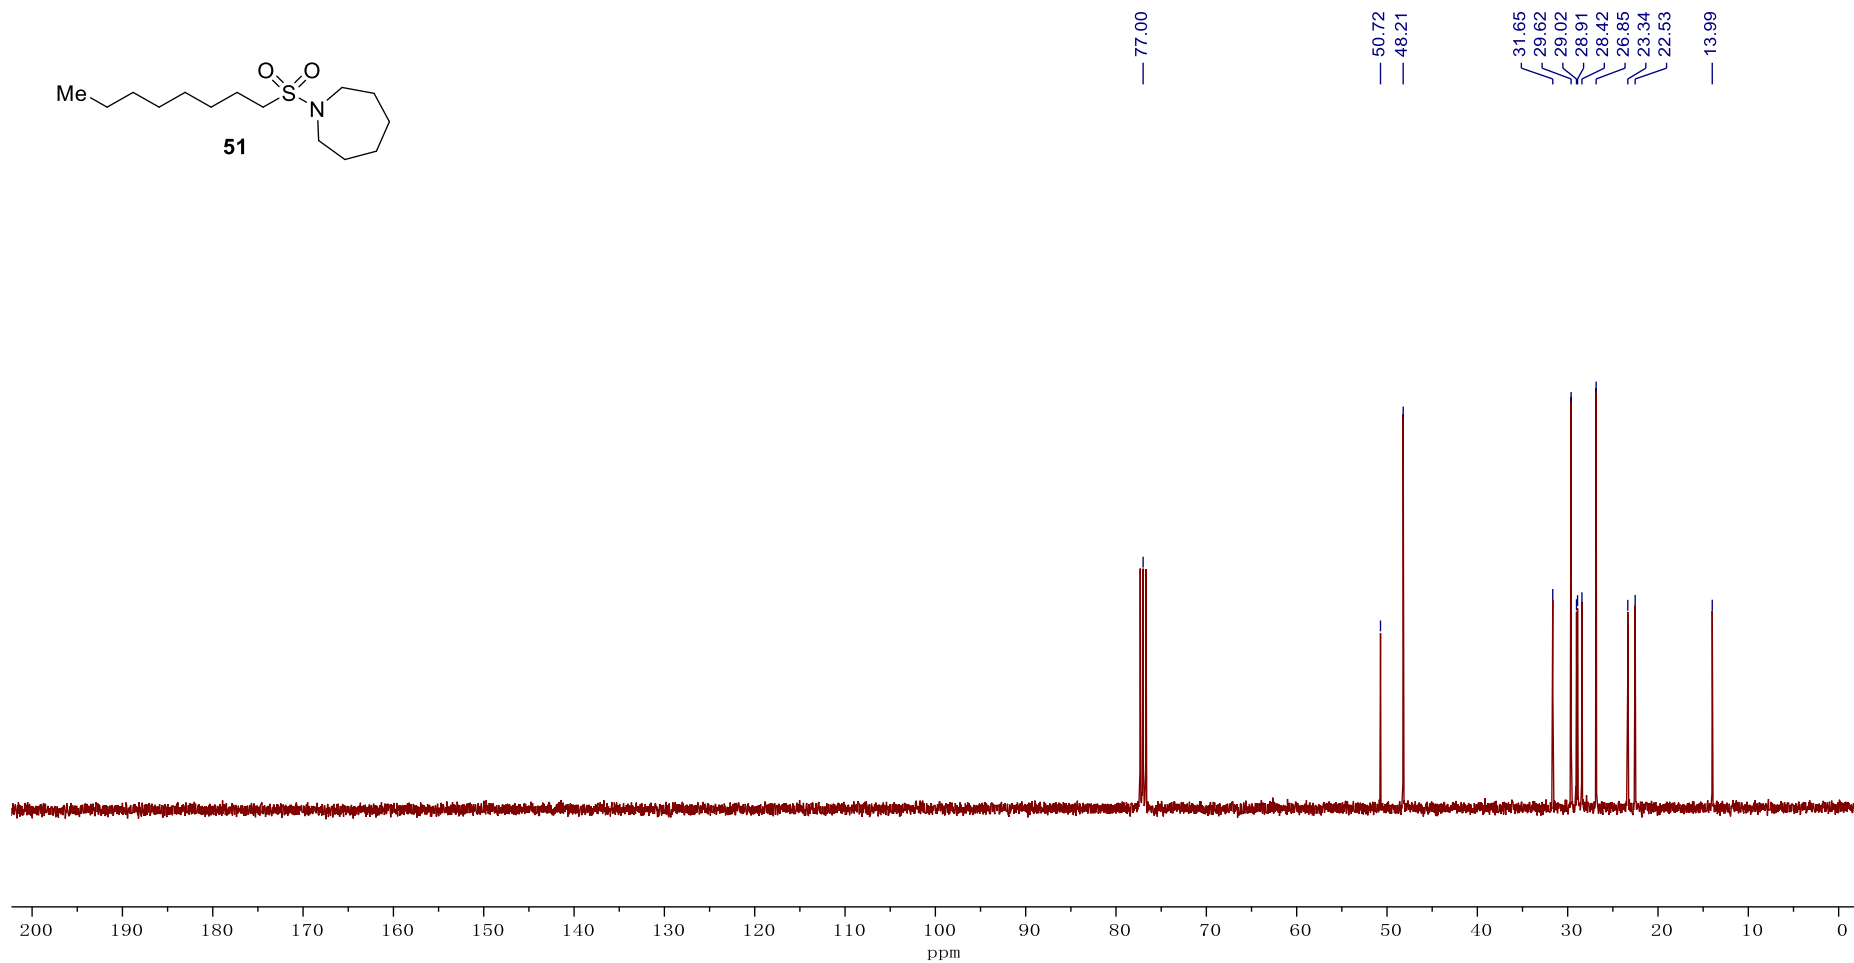



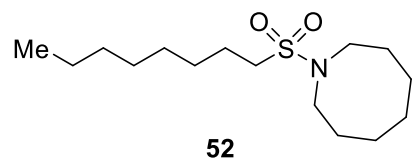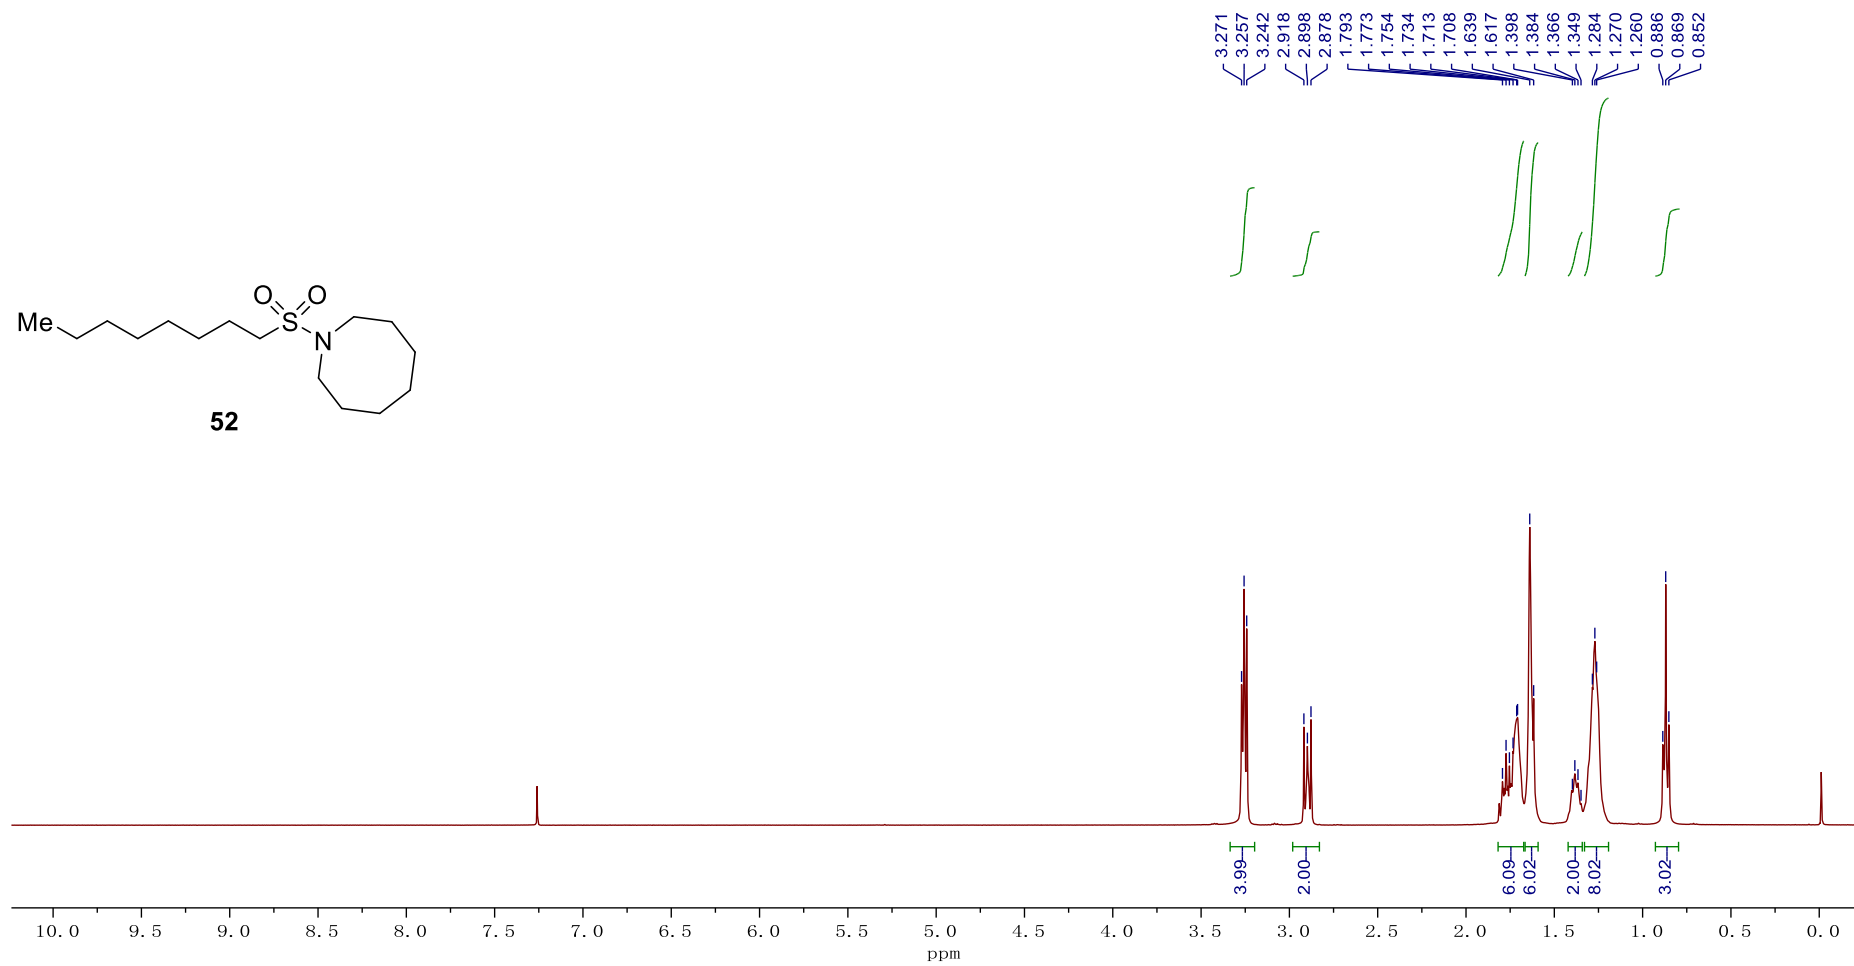

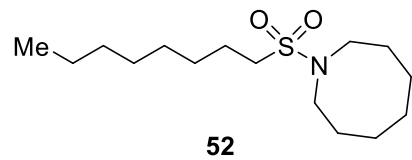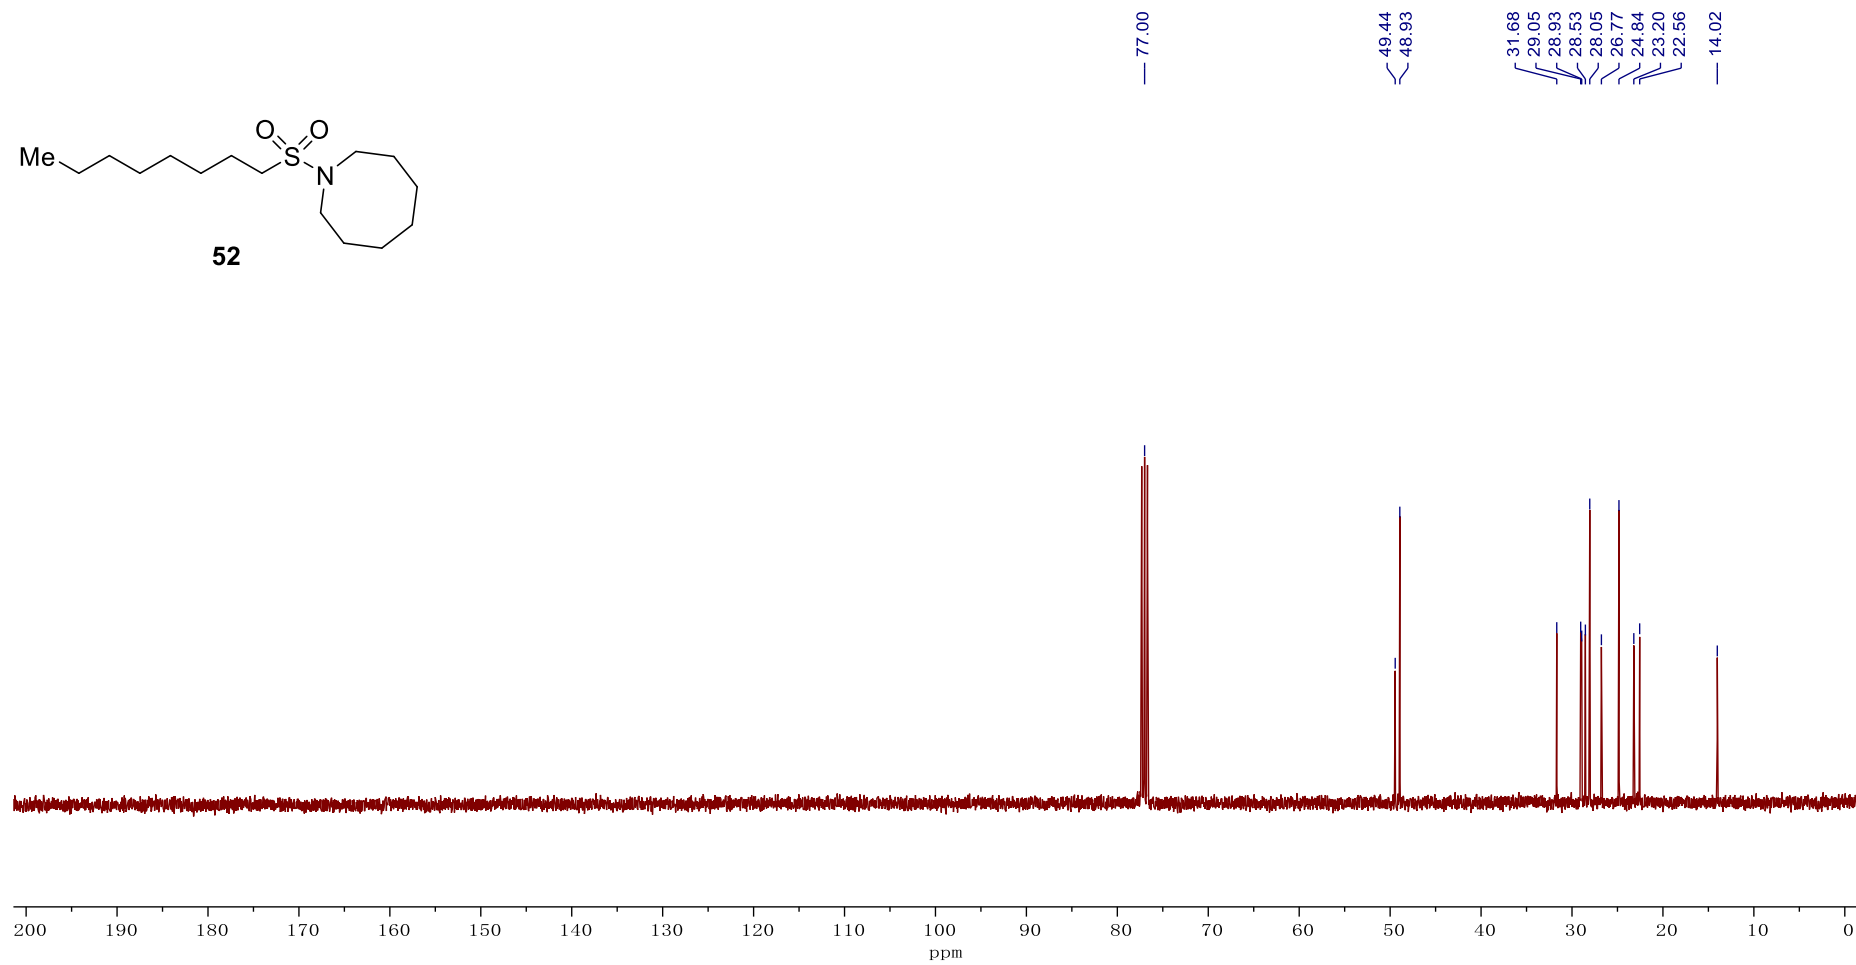

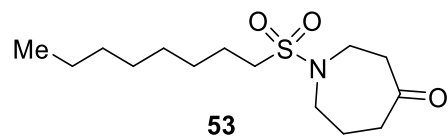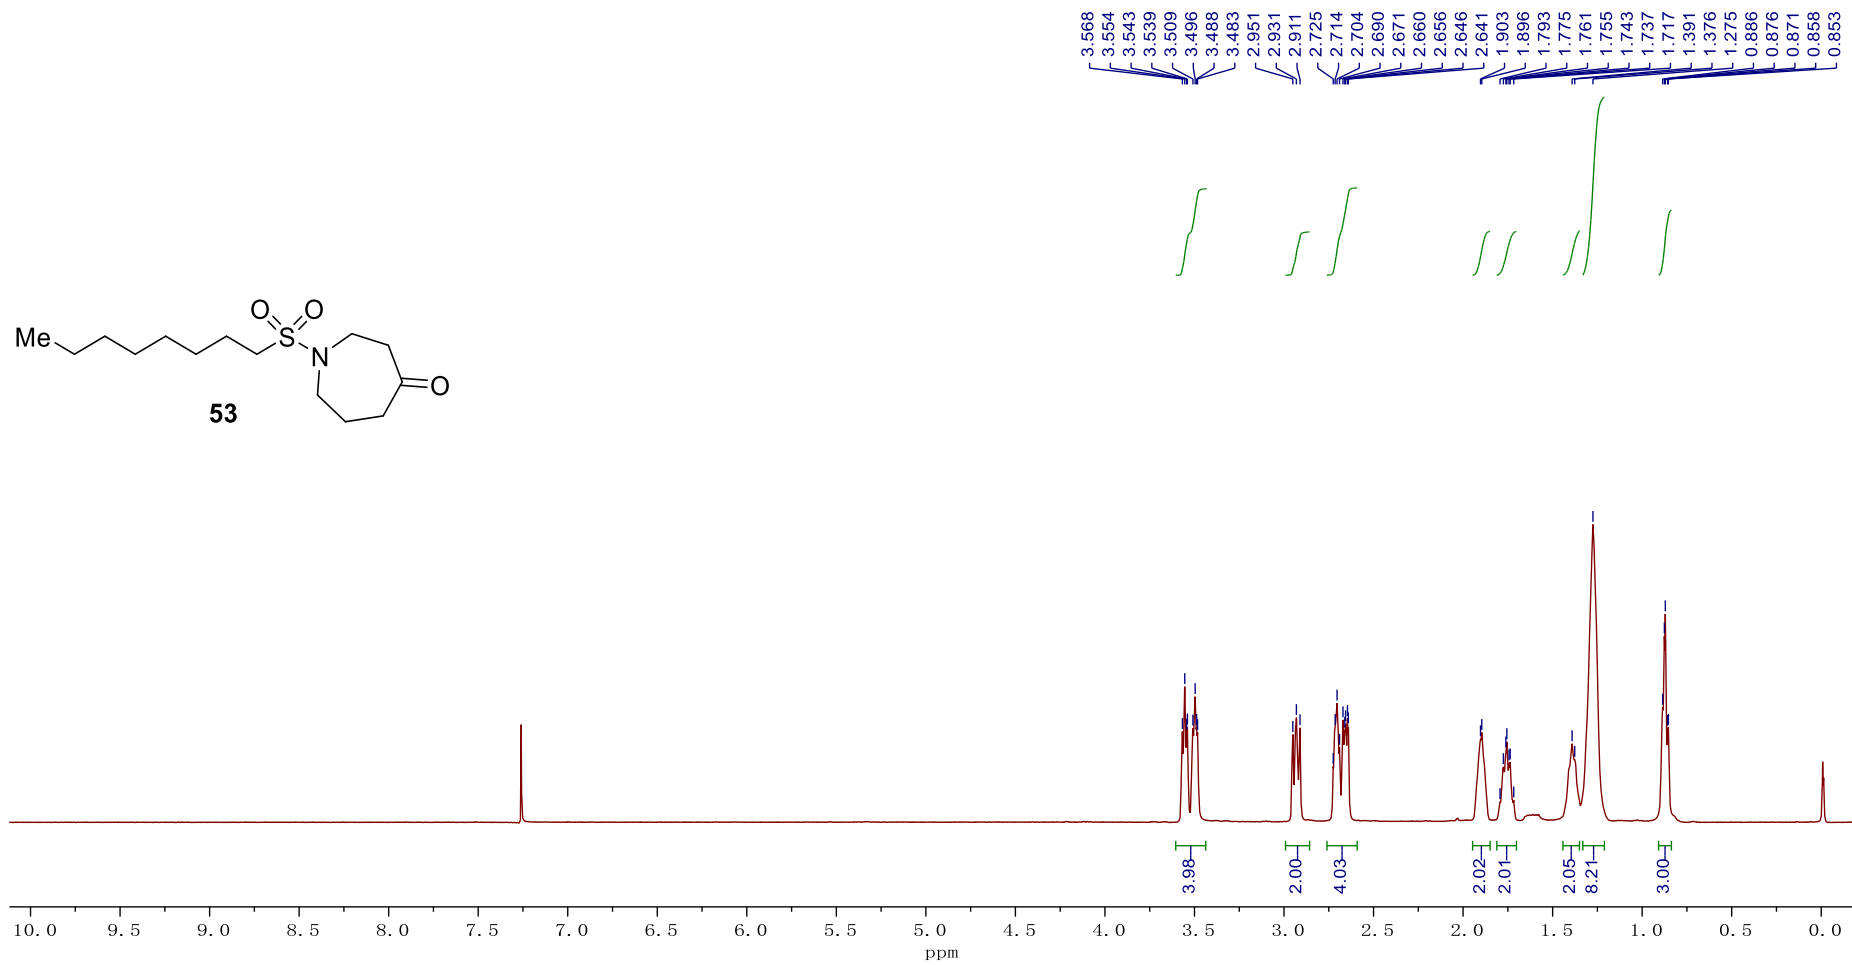

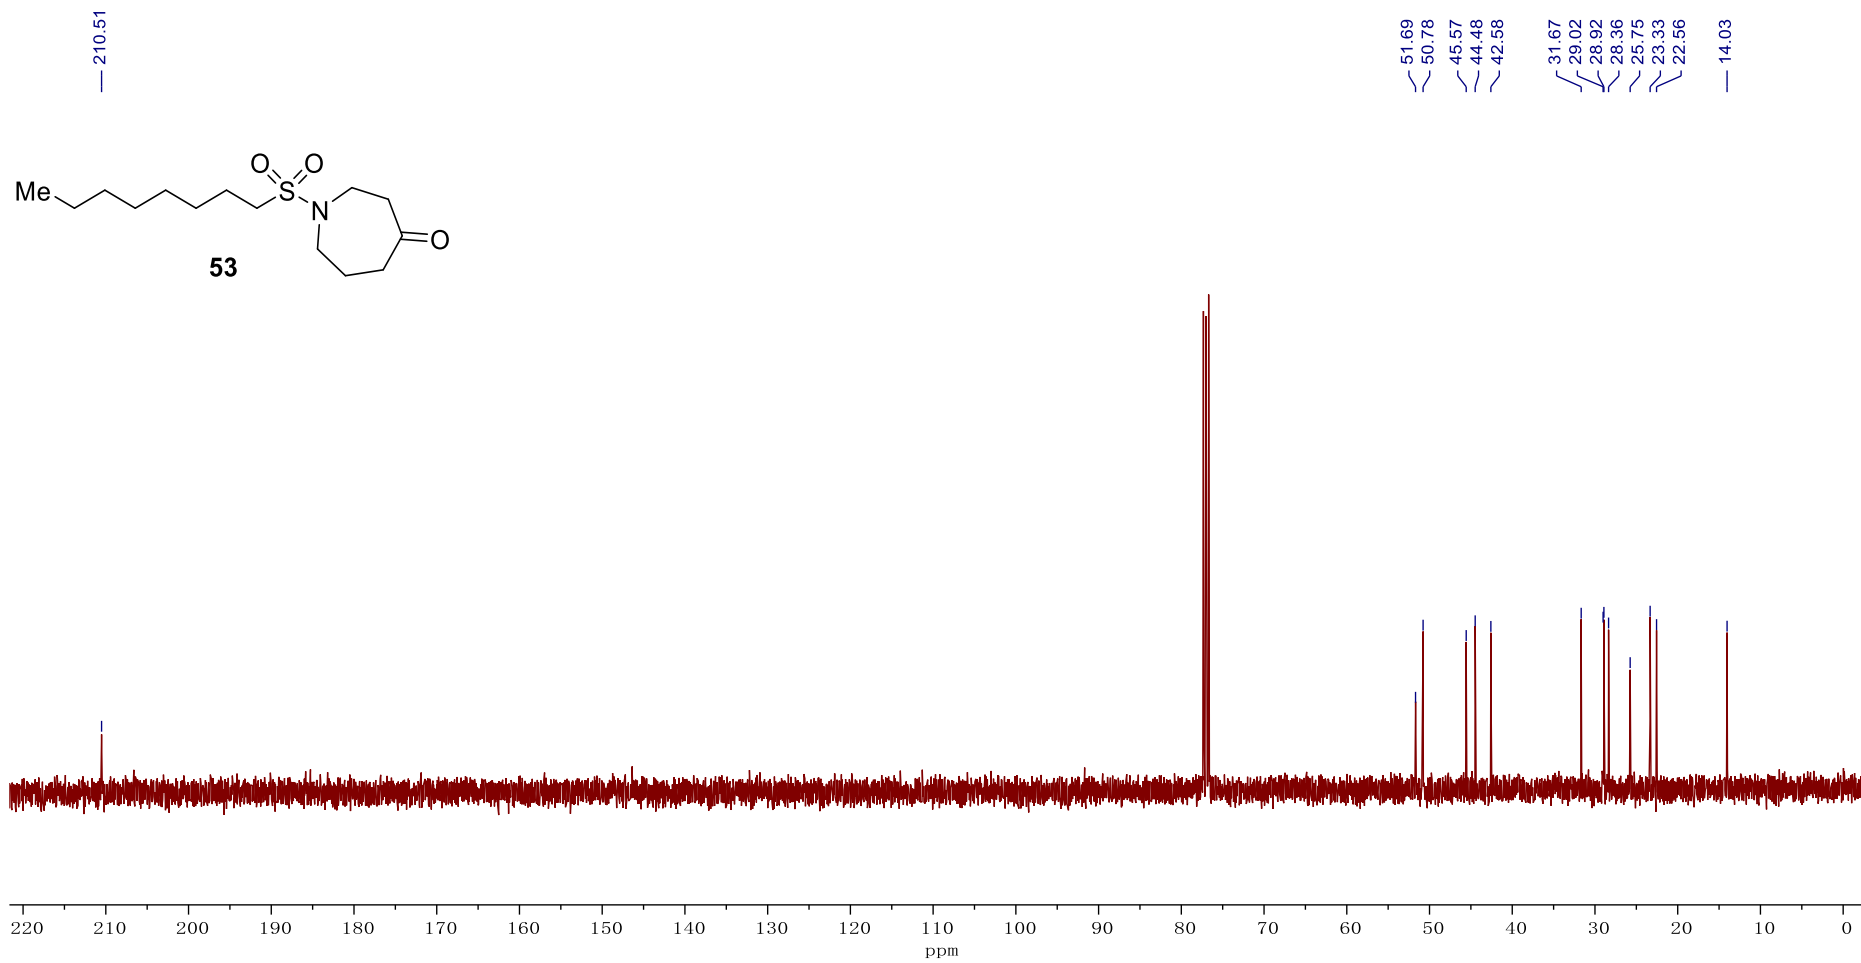

S156

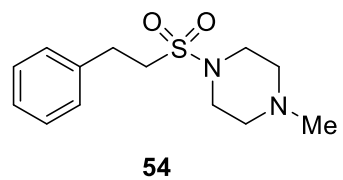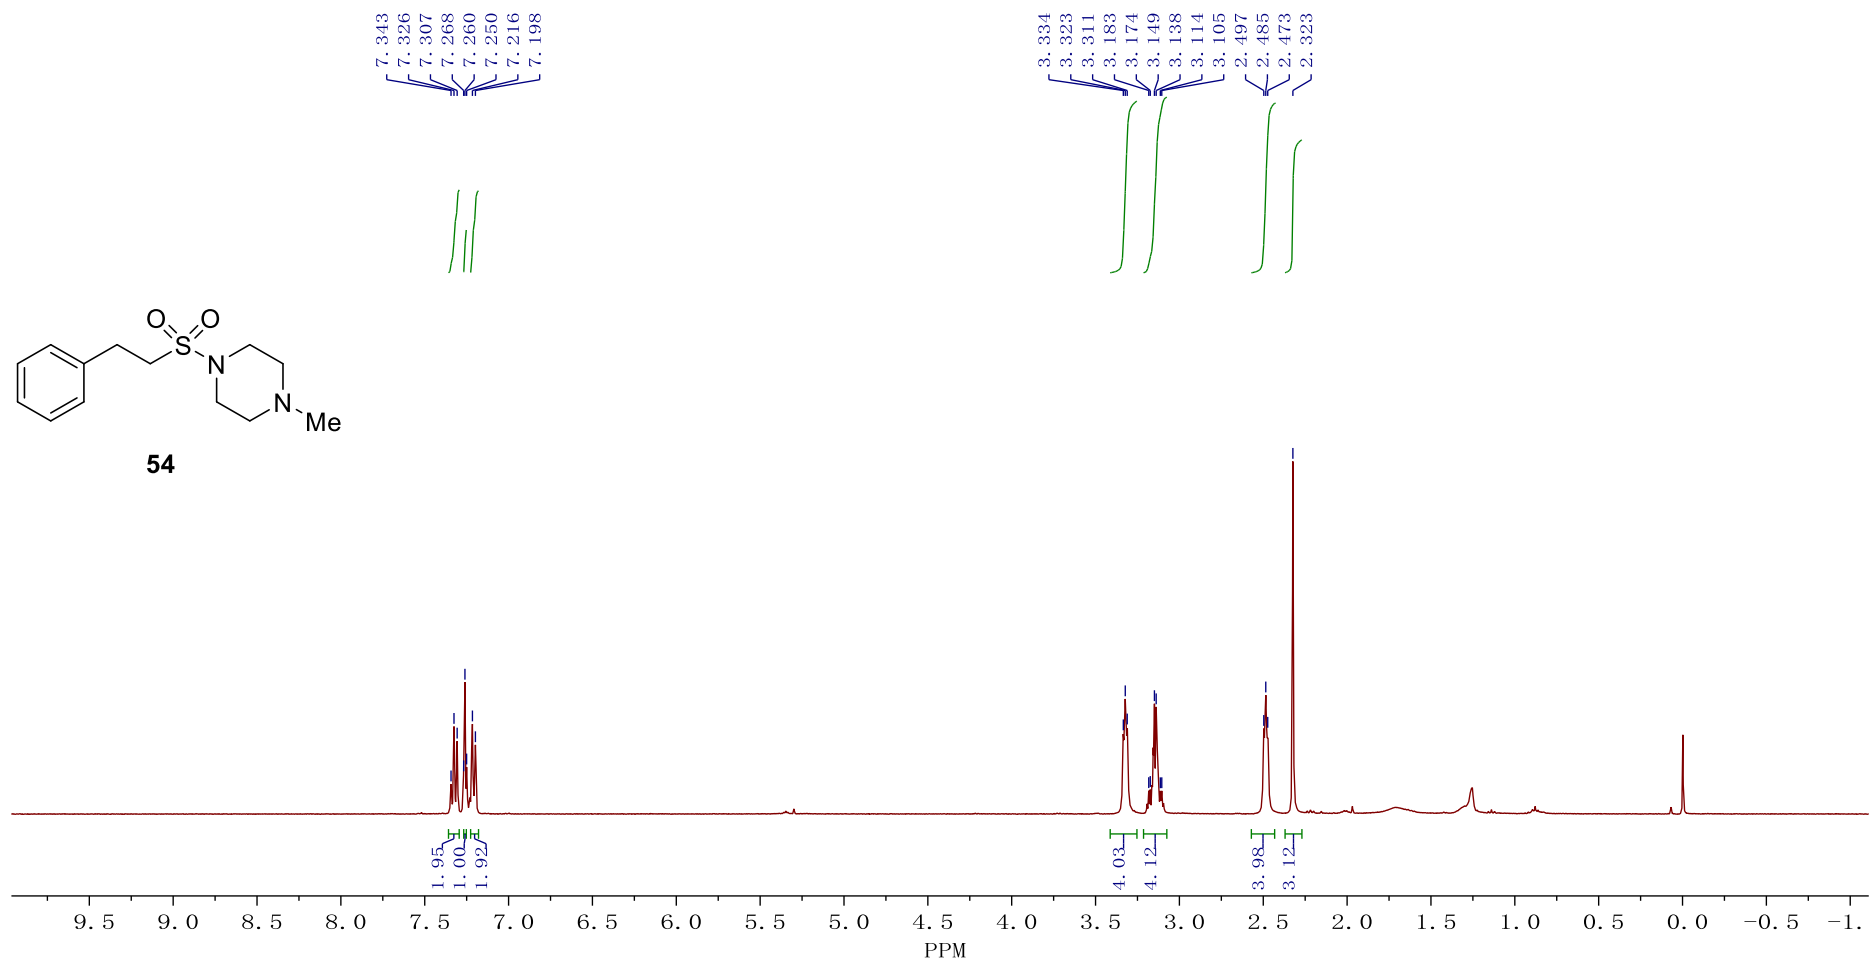

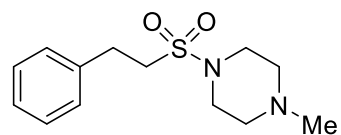

54

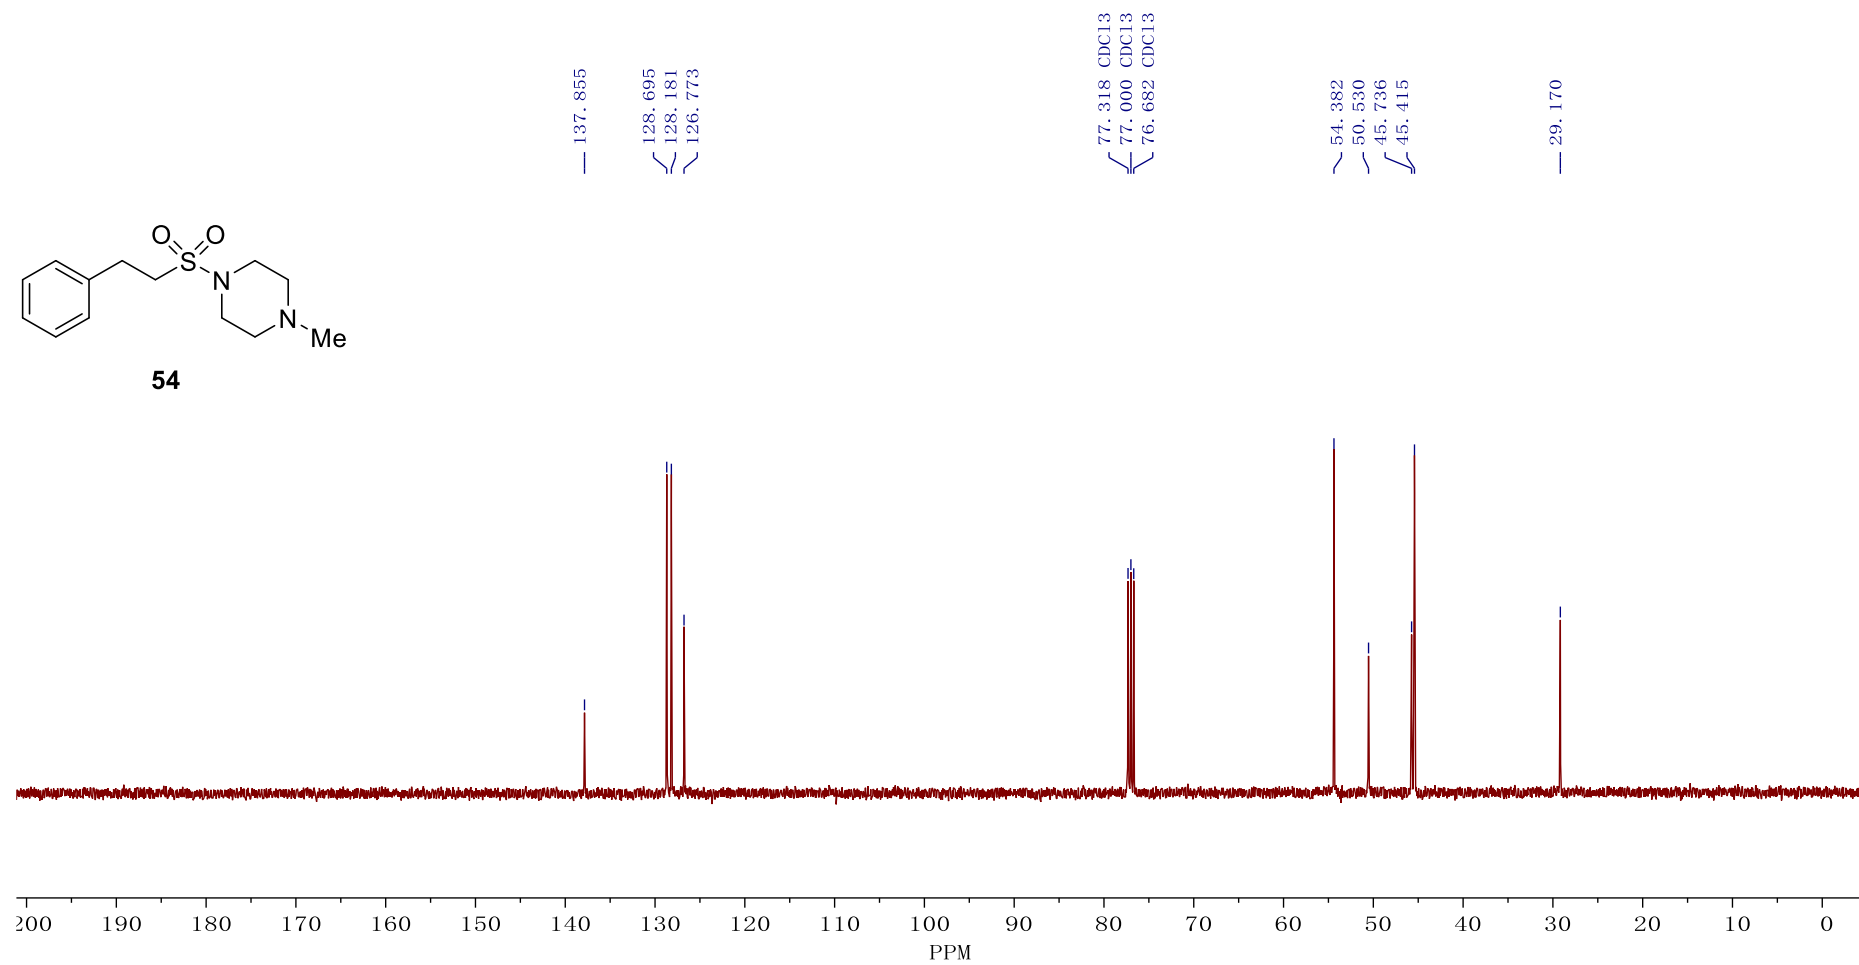

S158

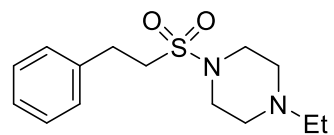

55

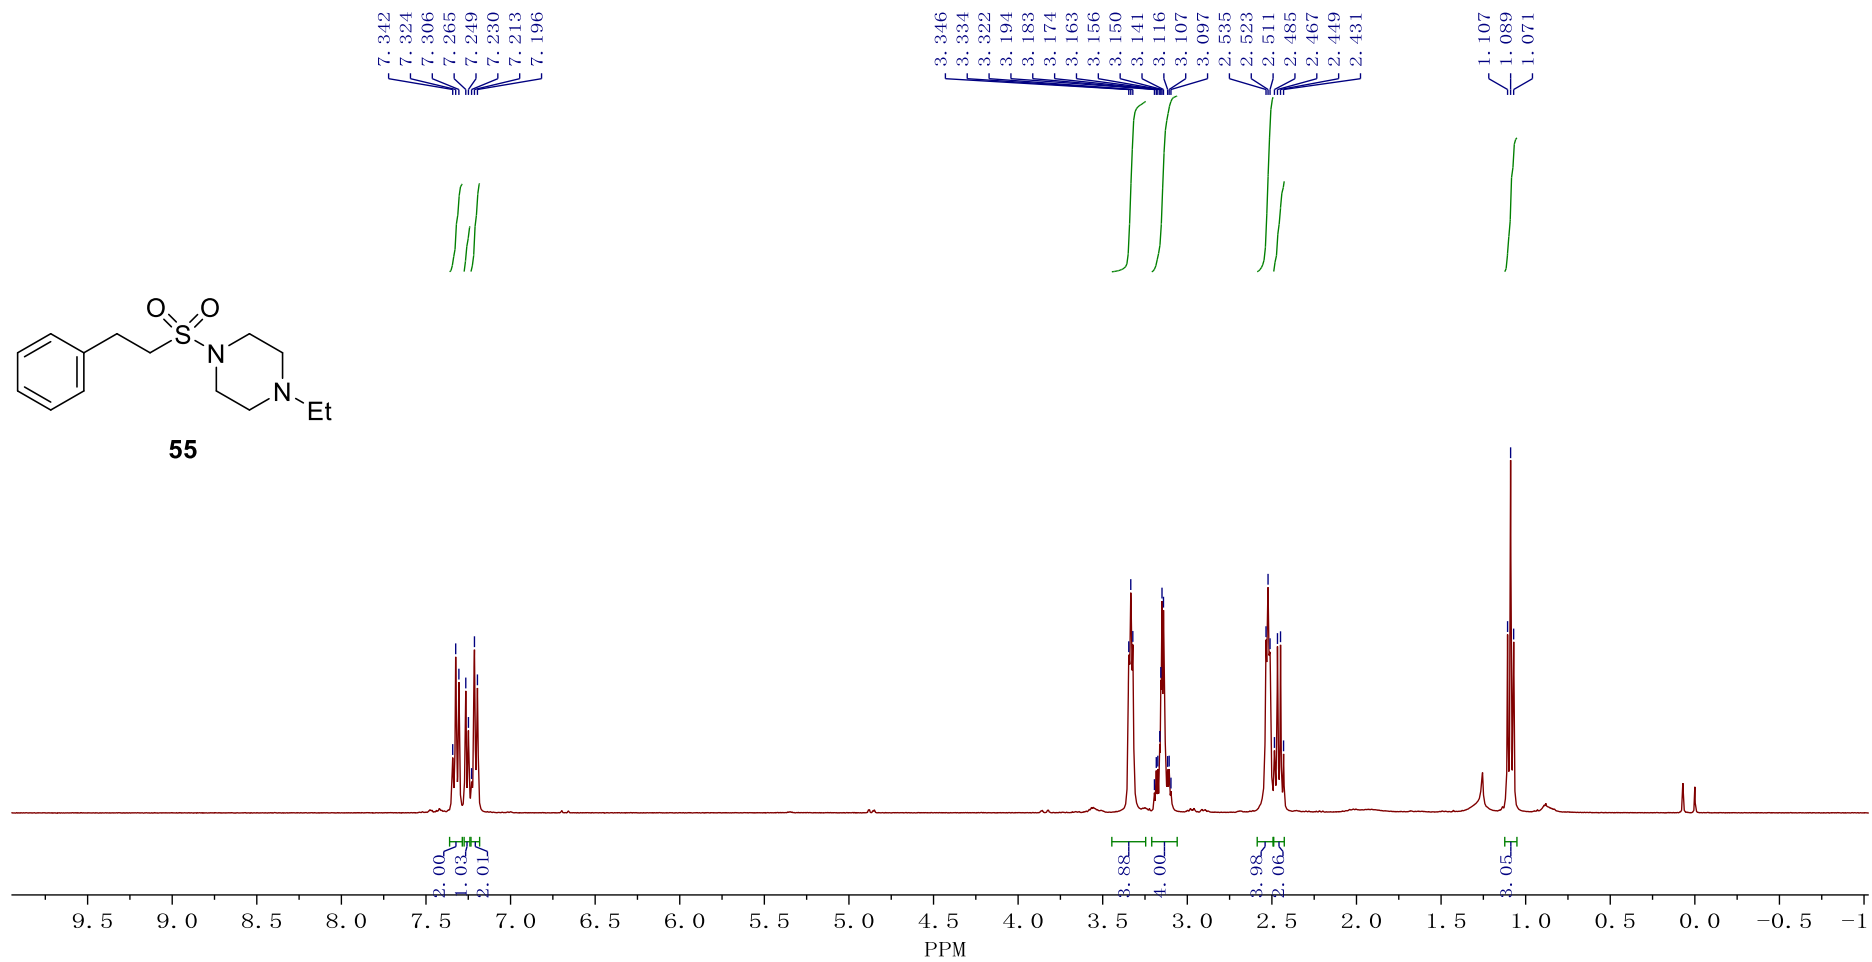

S159

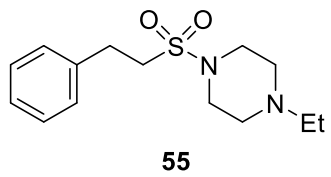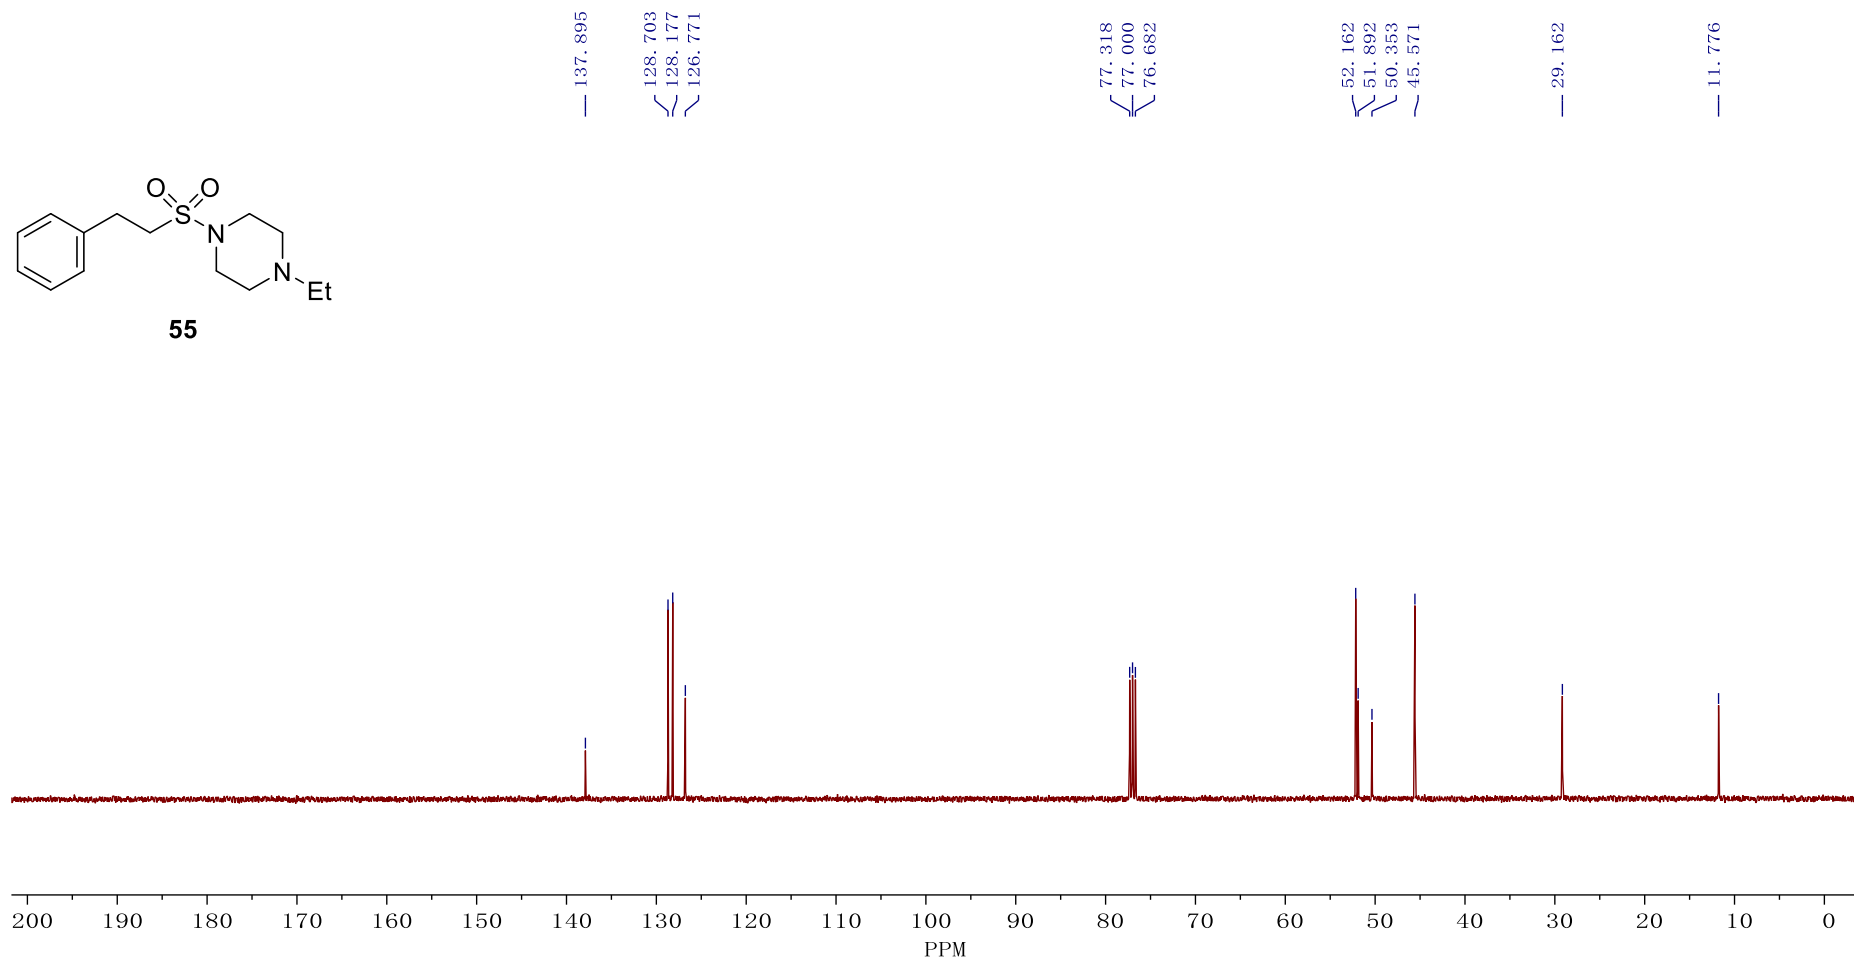

S160



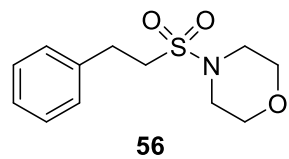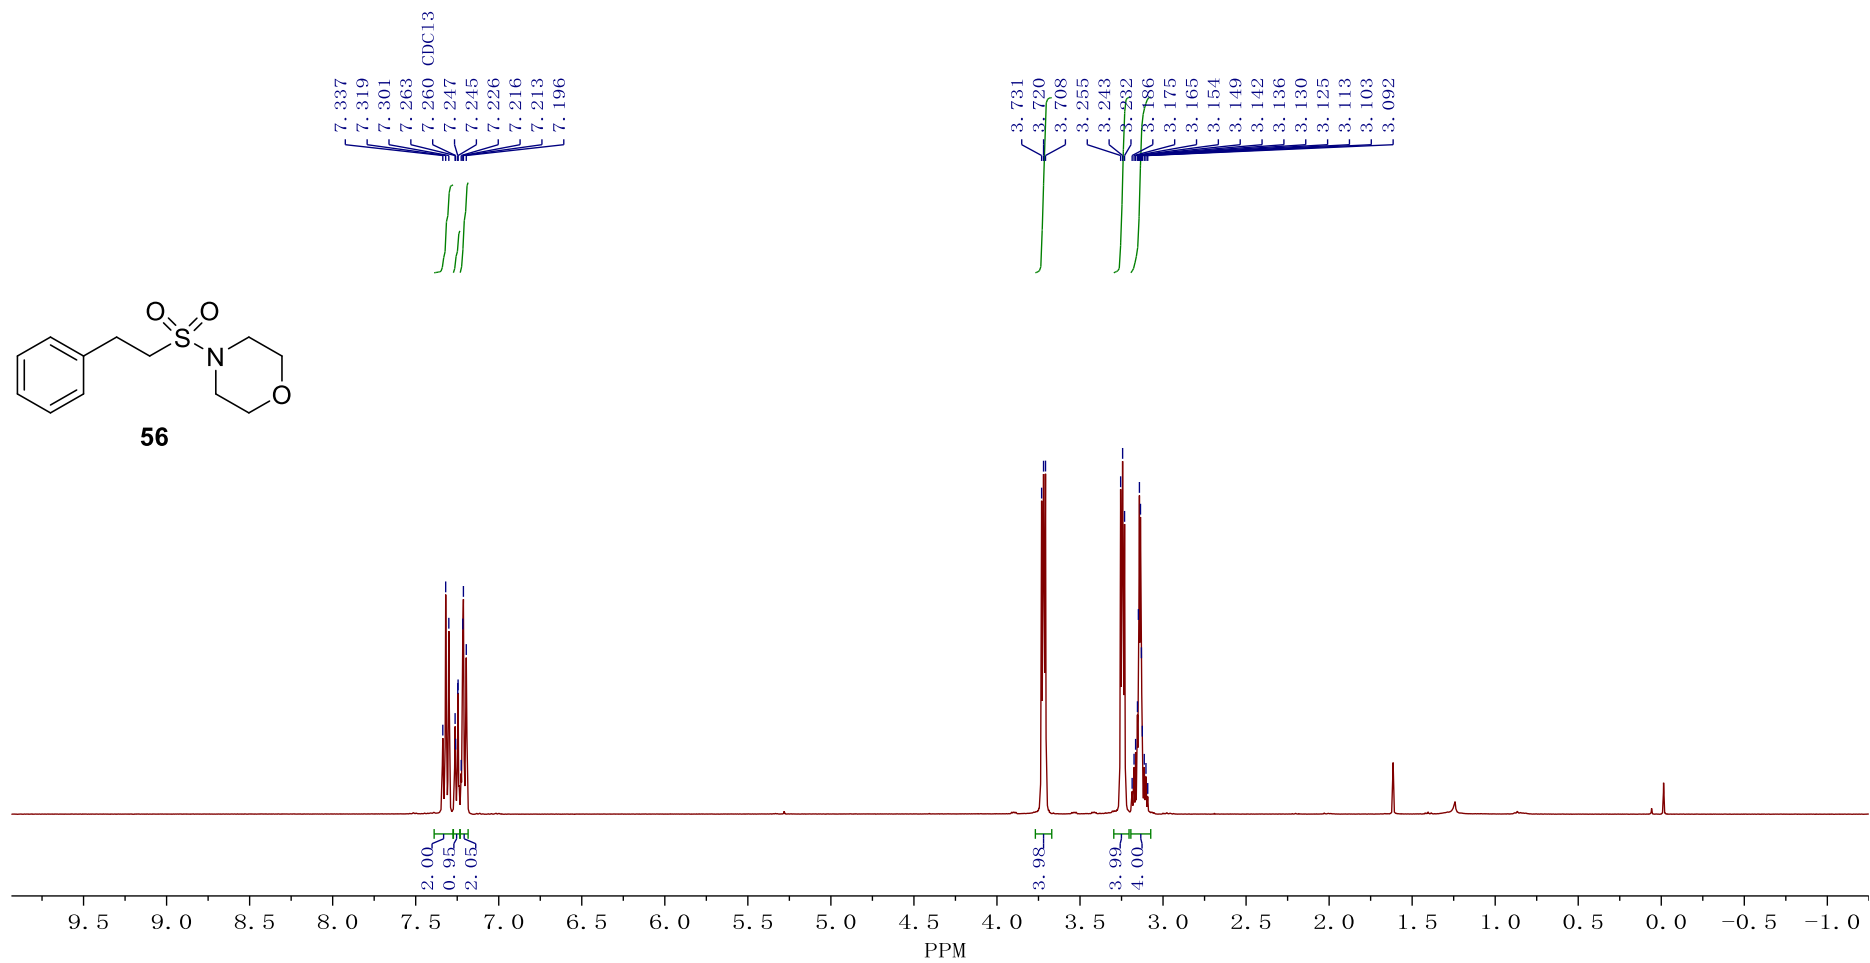

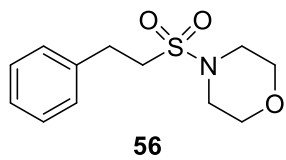

137.852

128.861

128.307

126.984

66.504

50.268

45.711

29.164

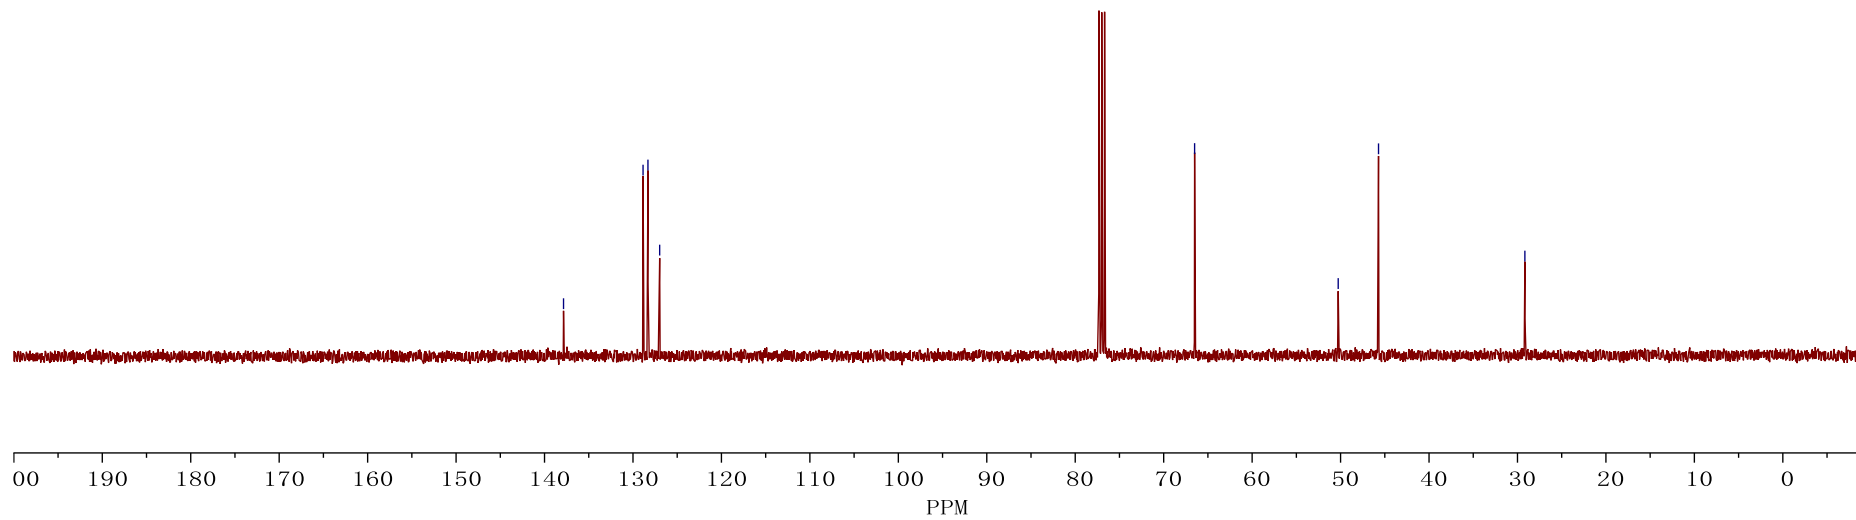

S162

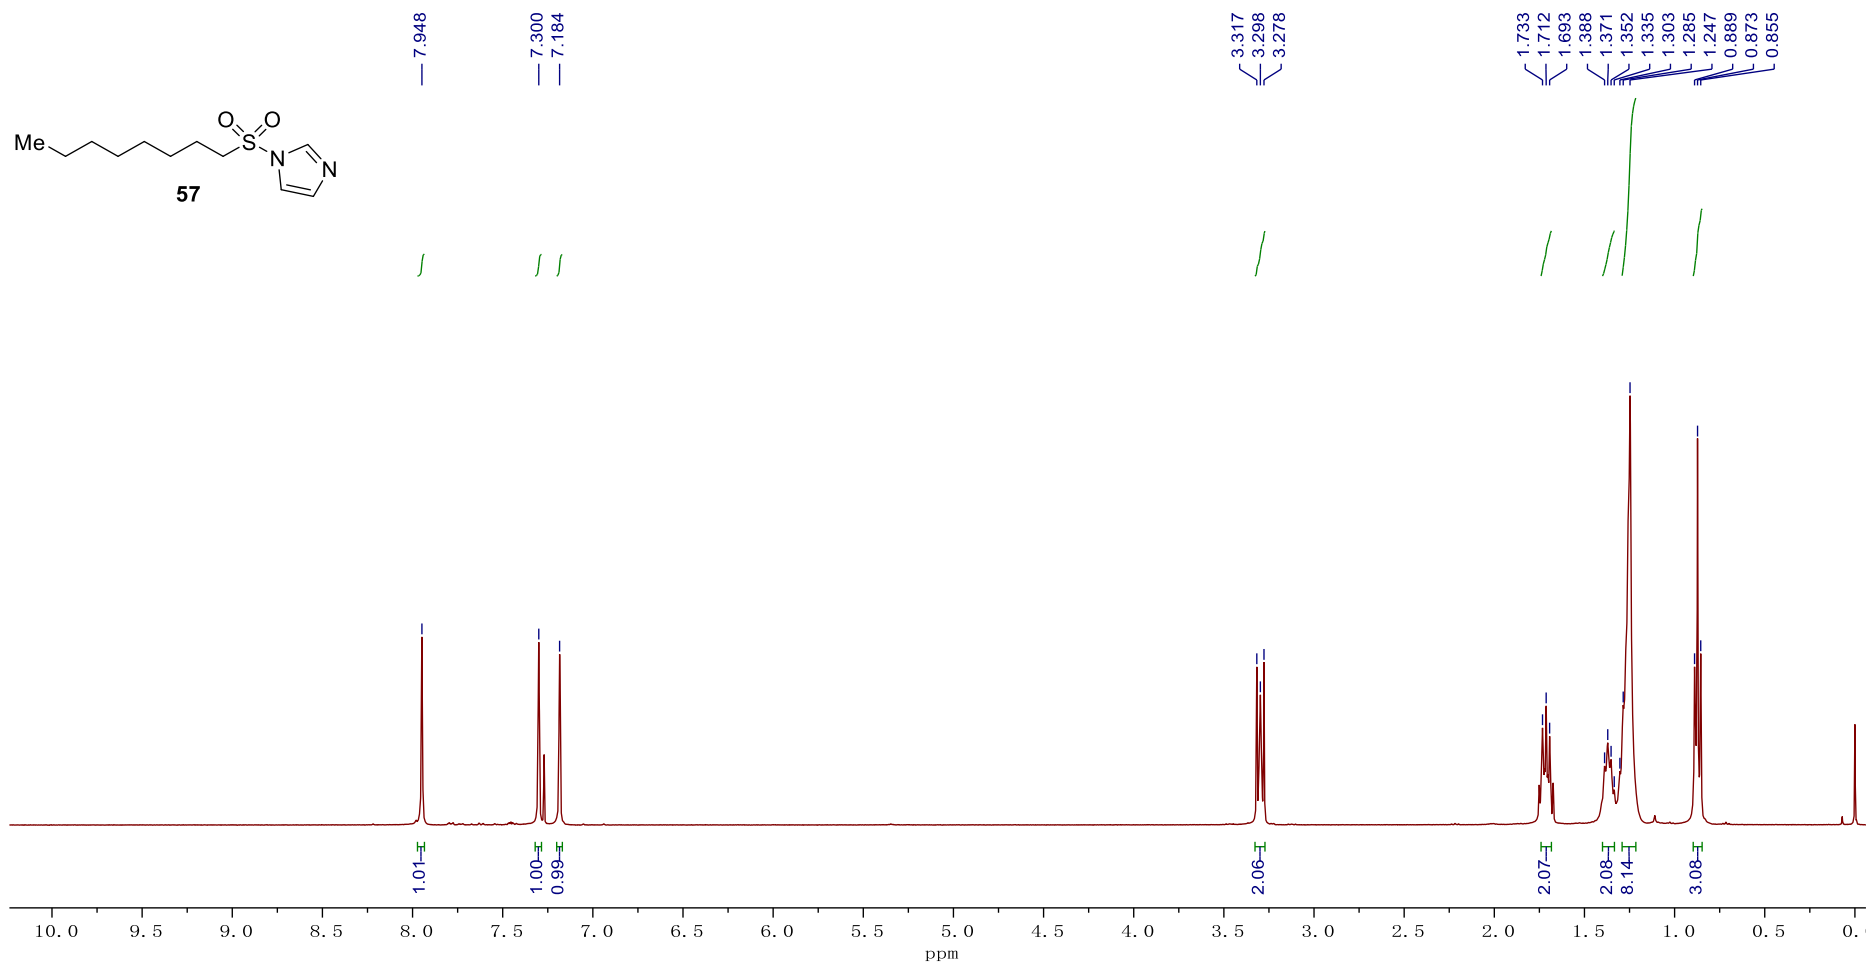

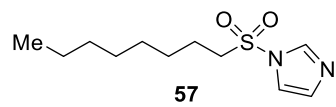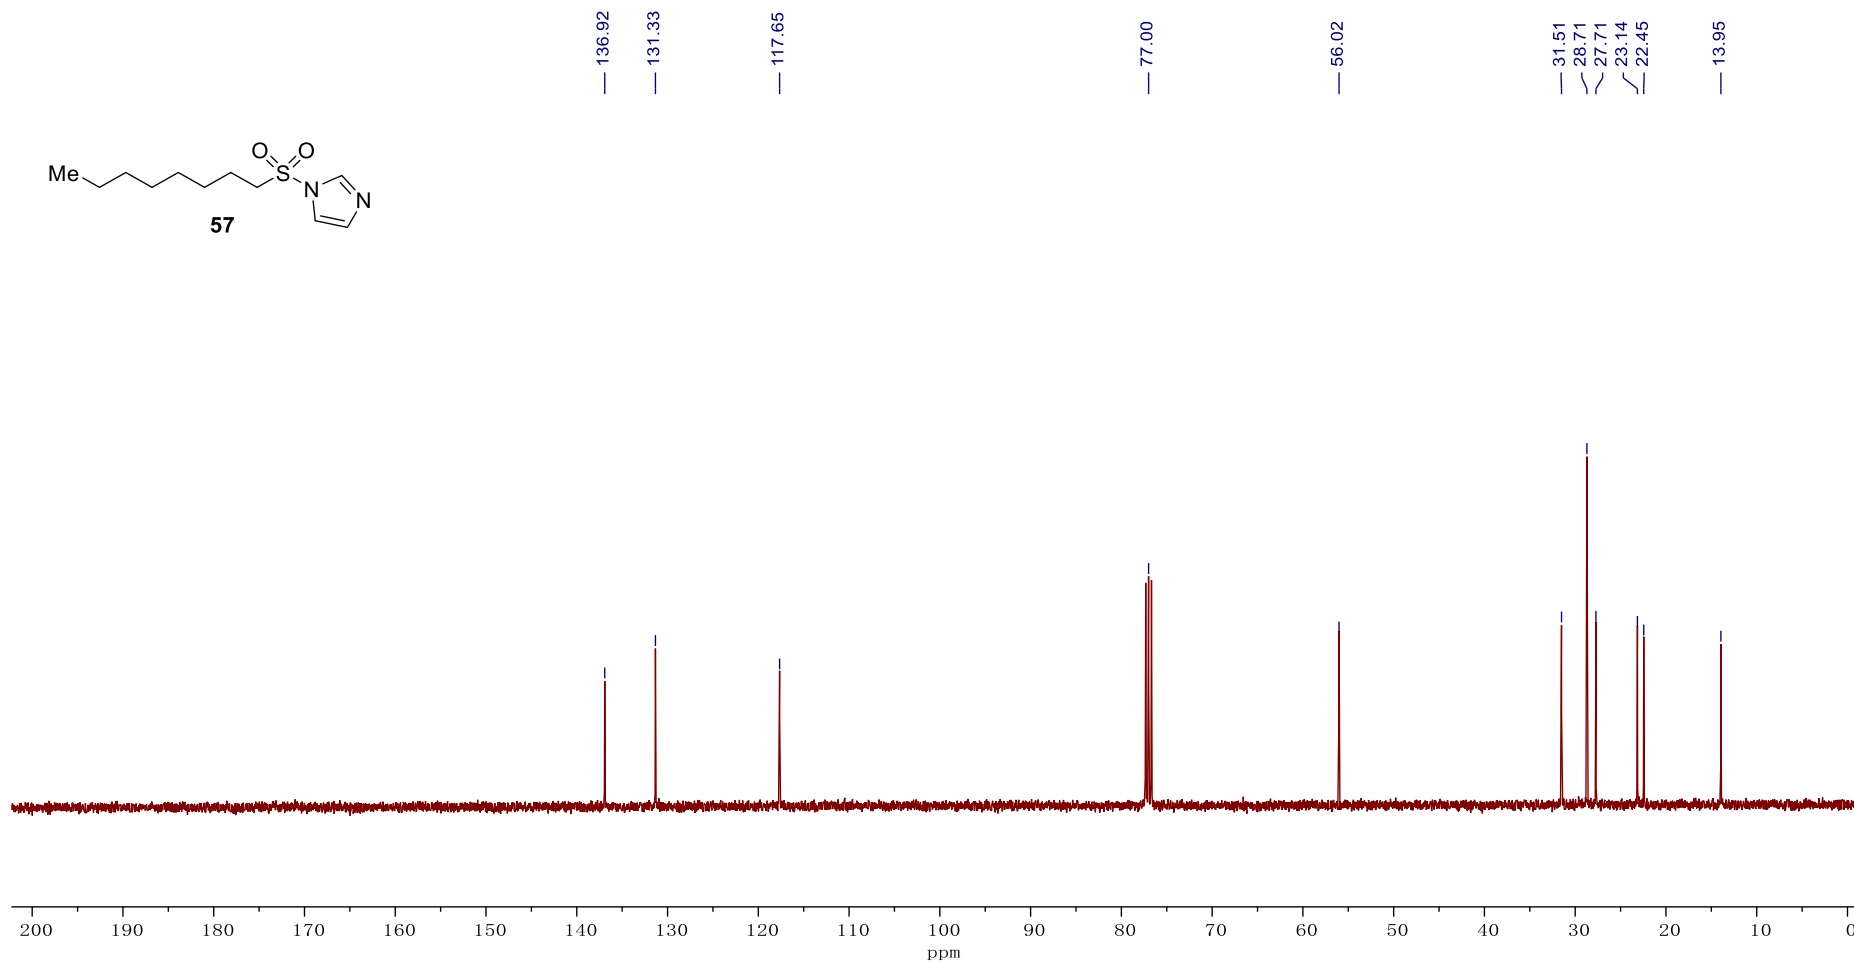

S164

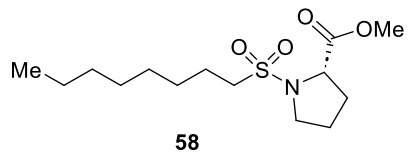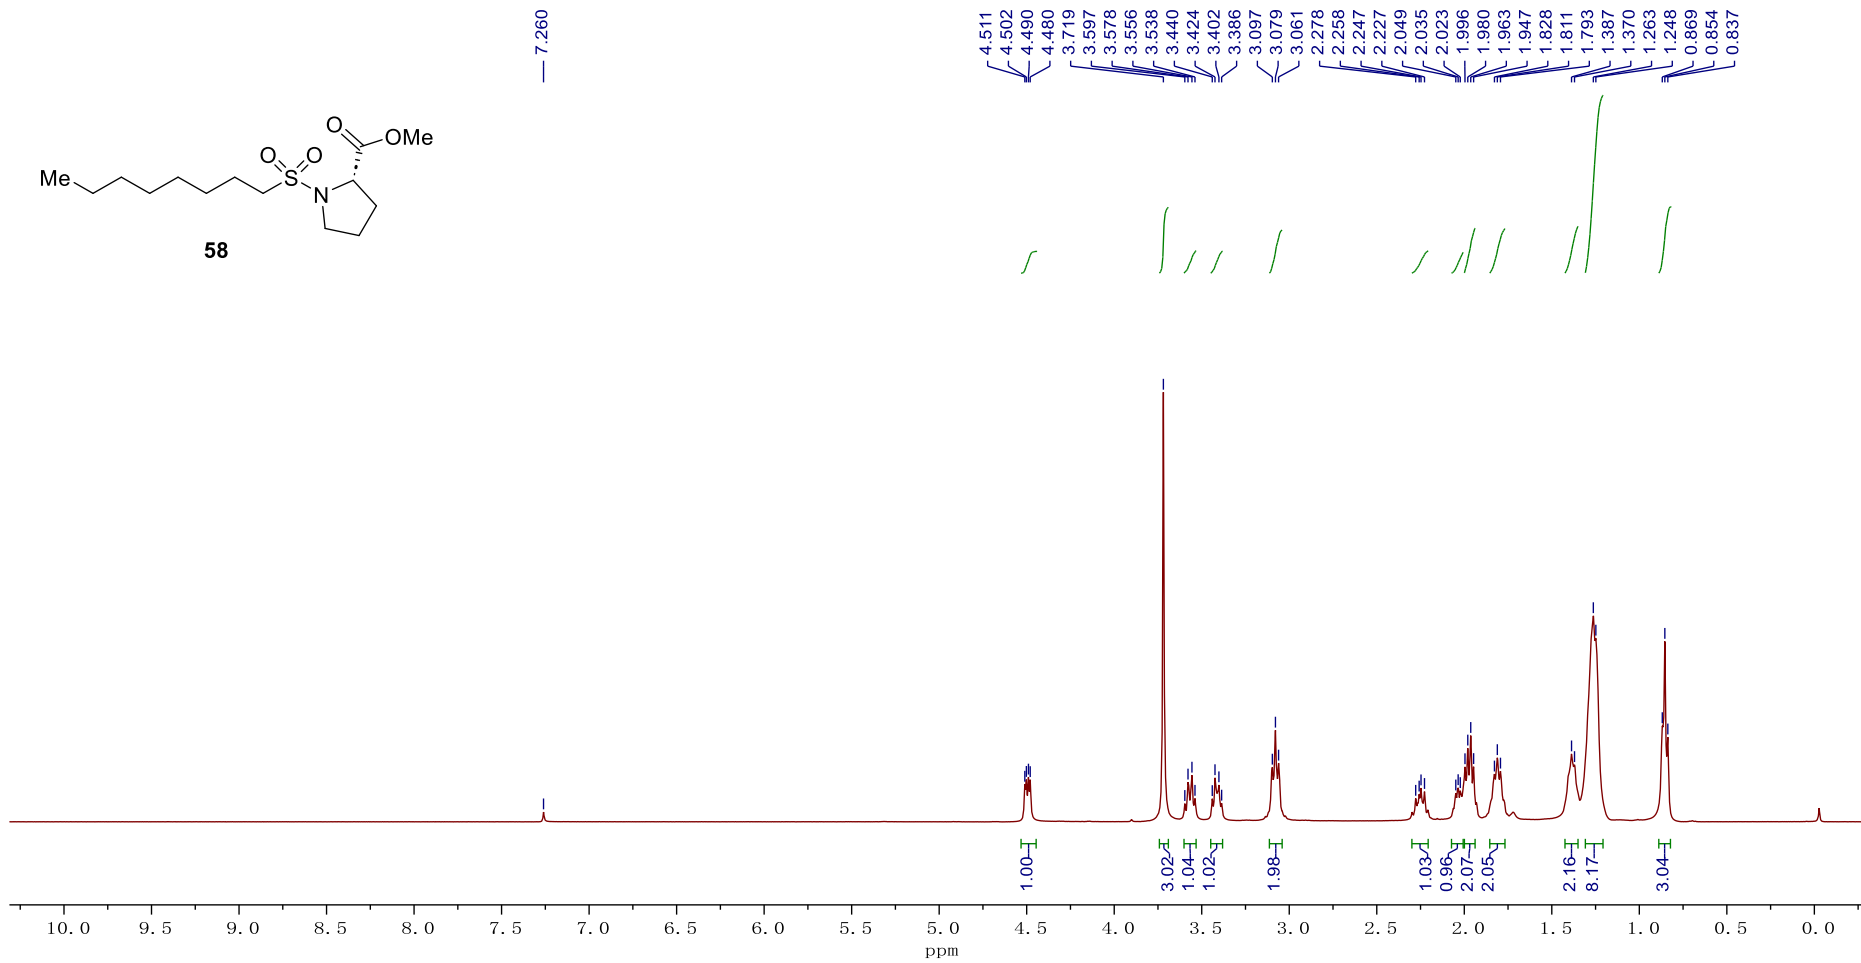

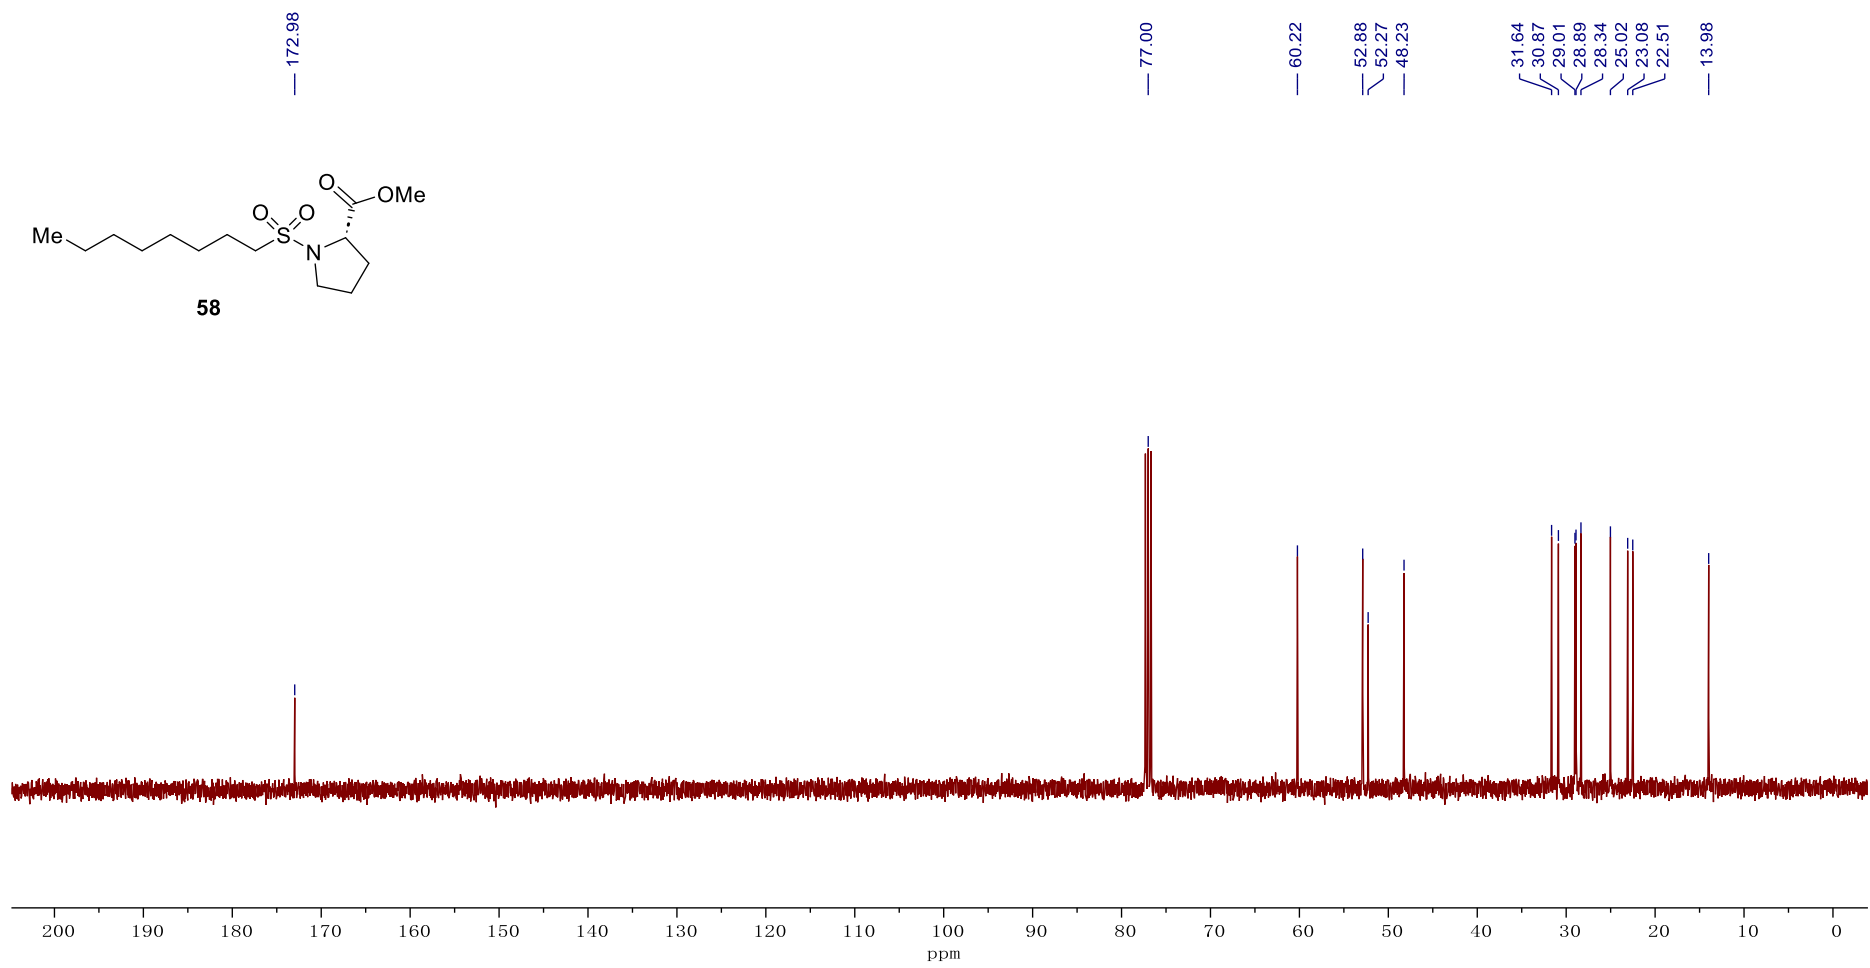

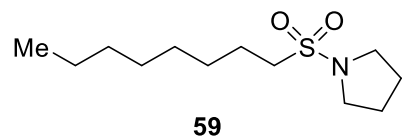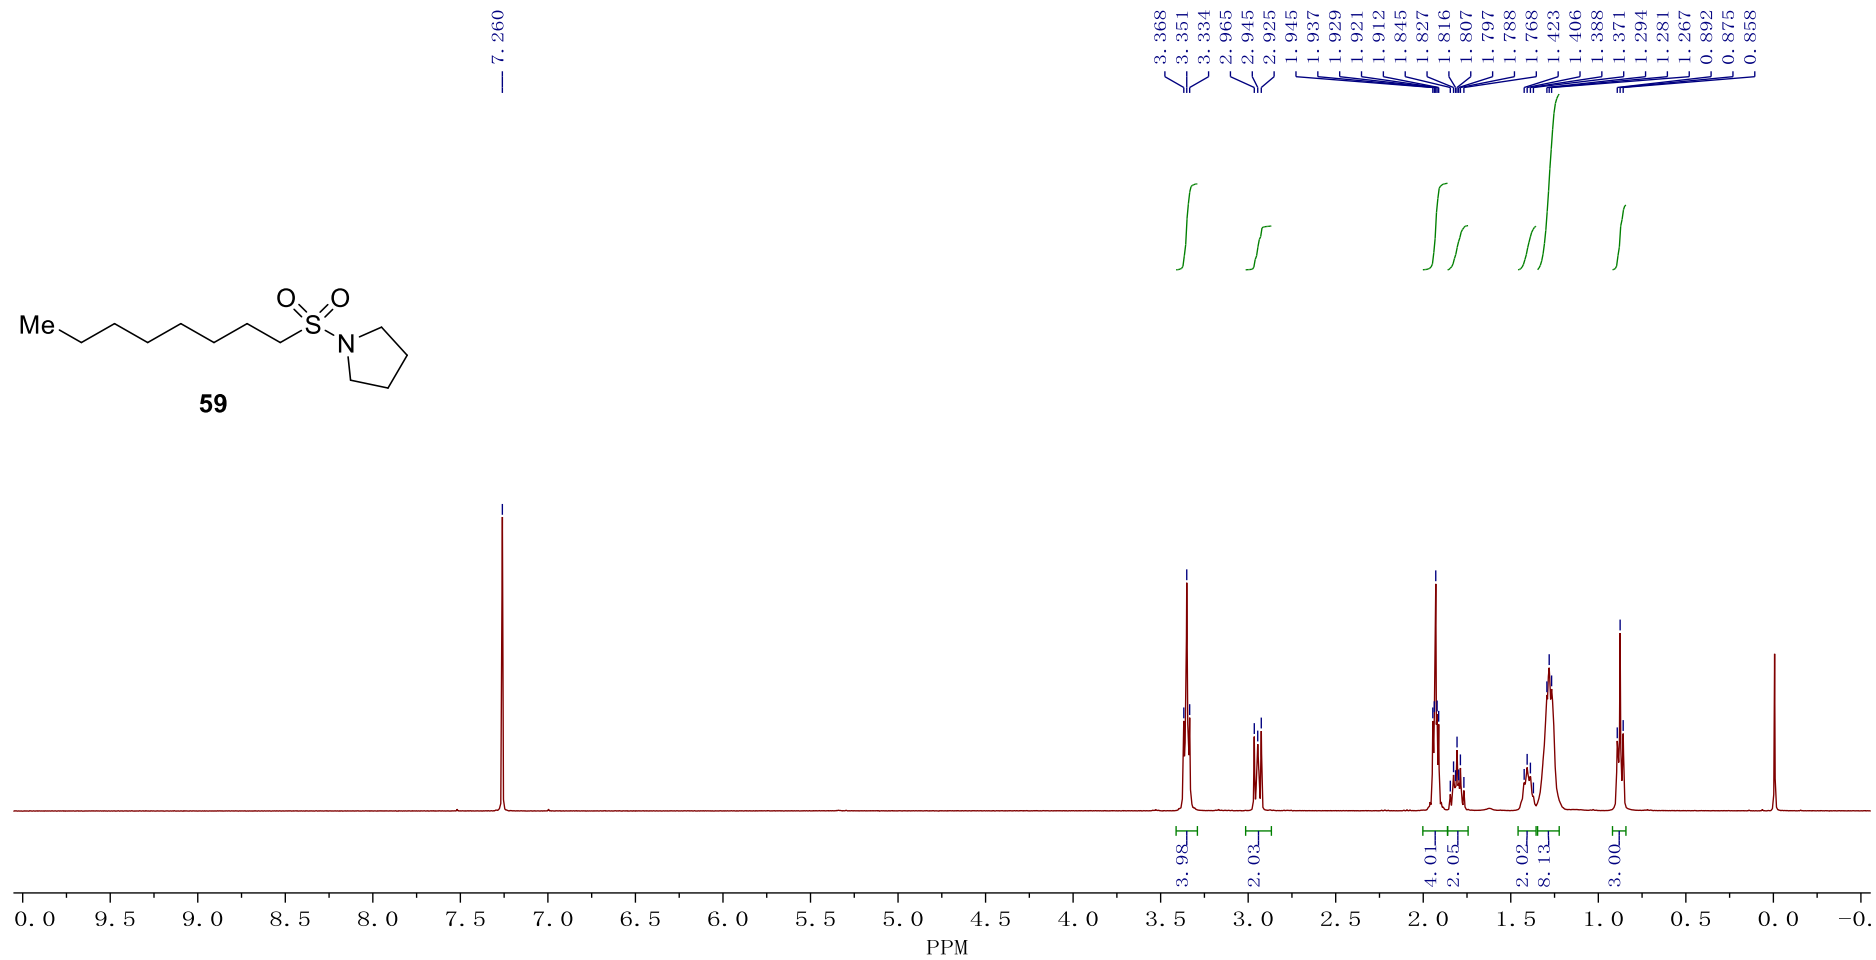

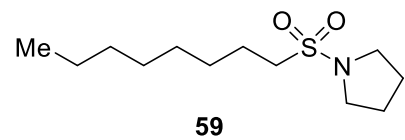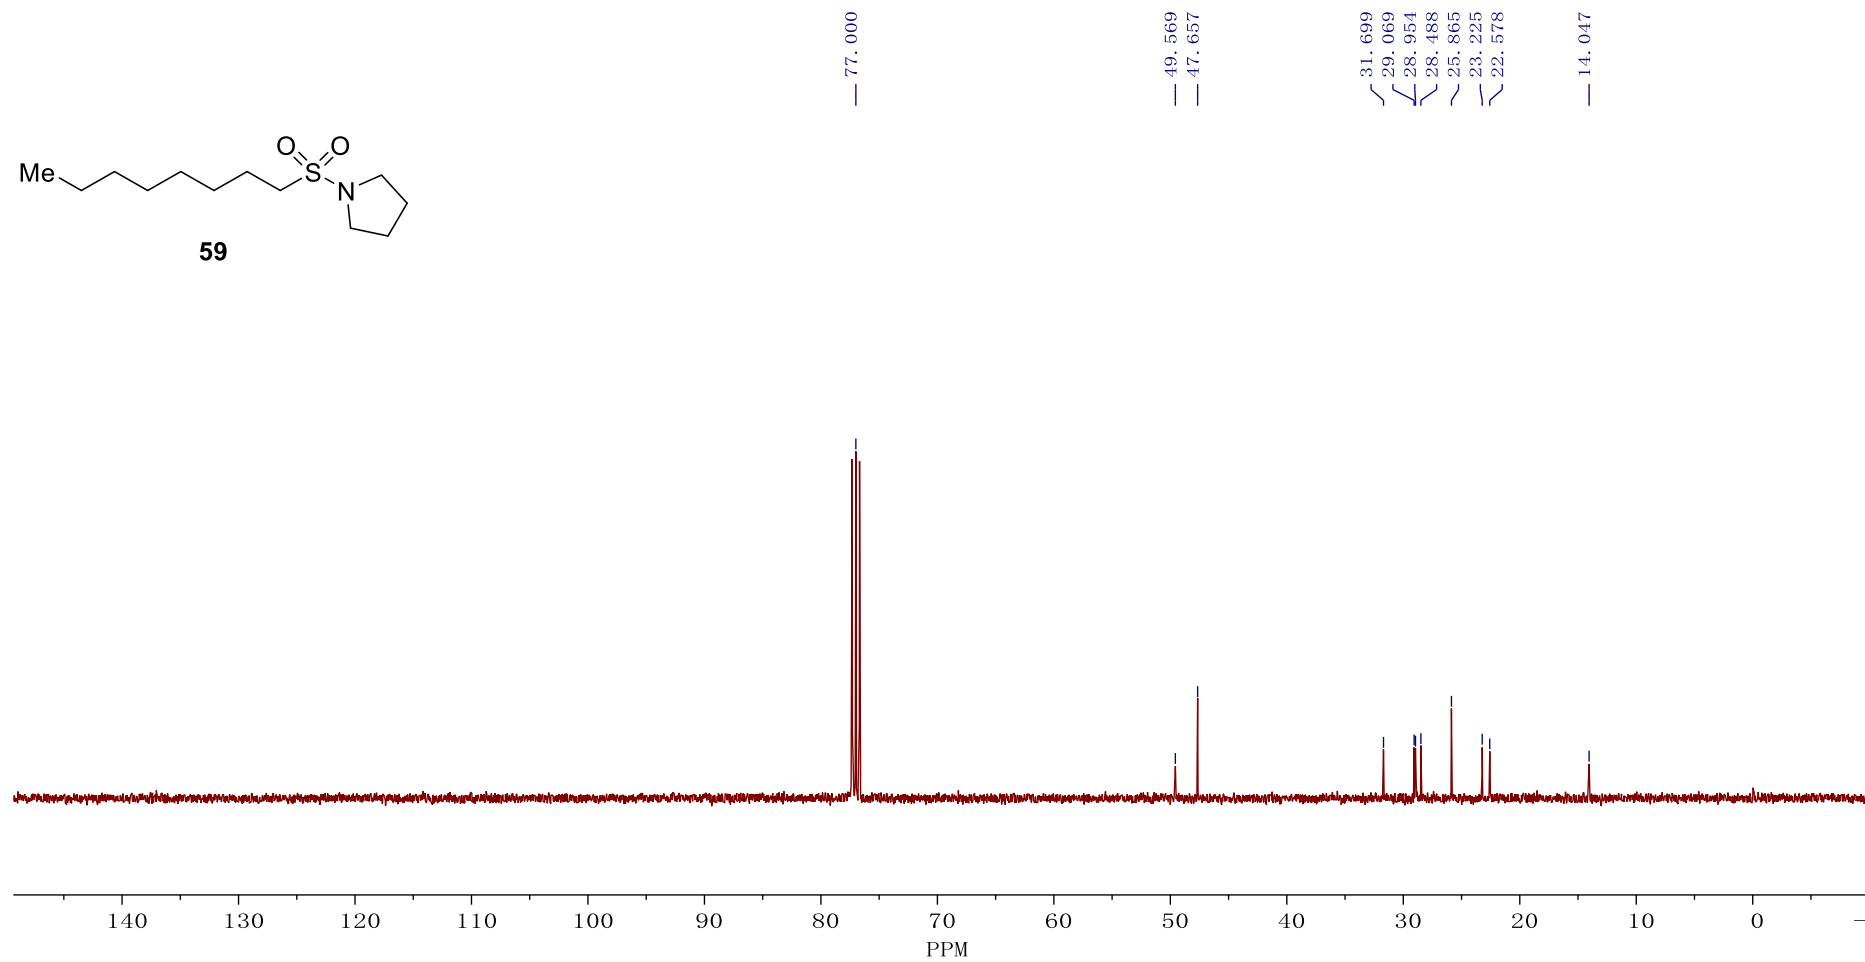



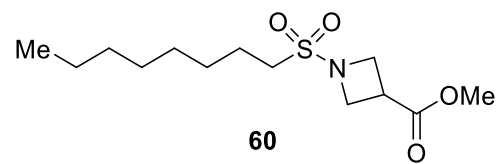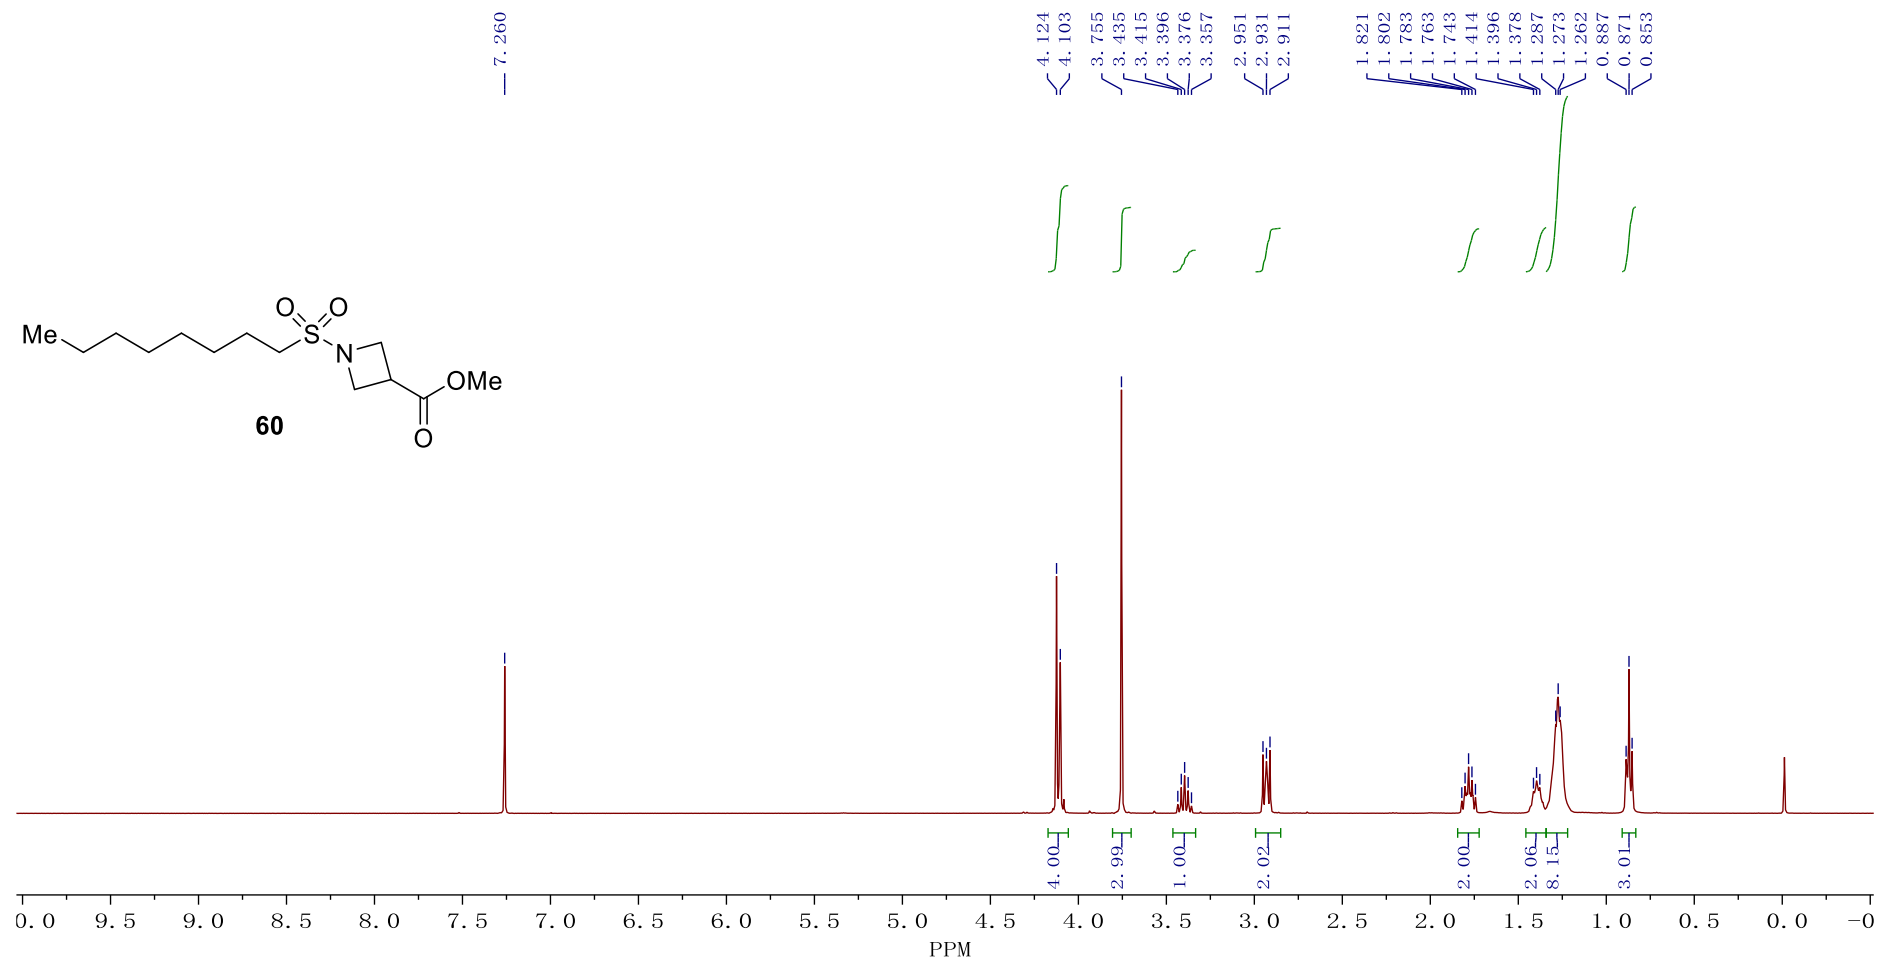

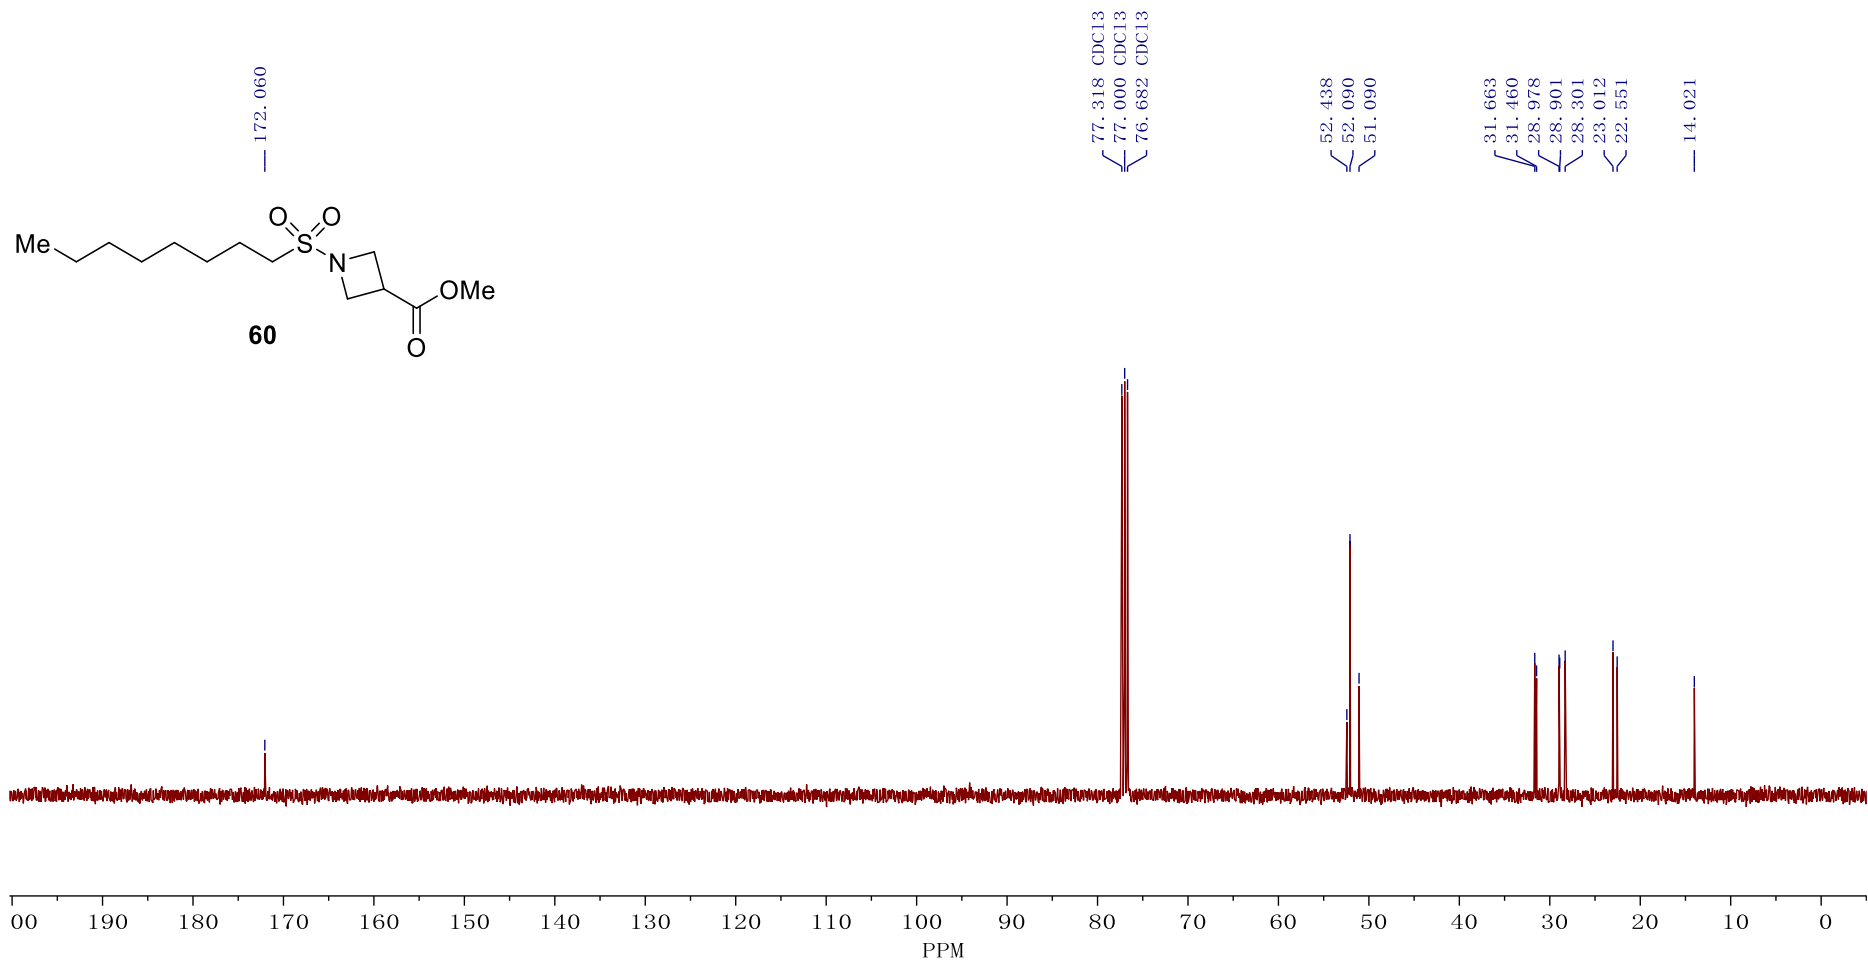

S170

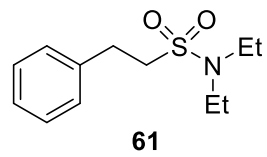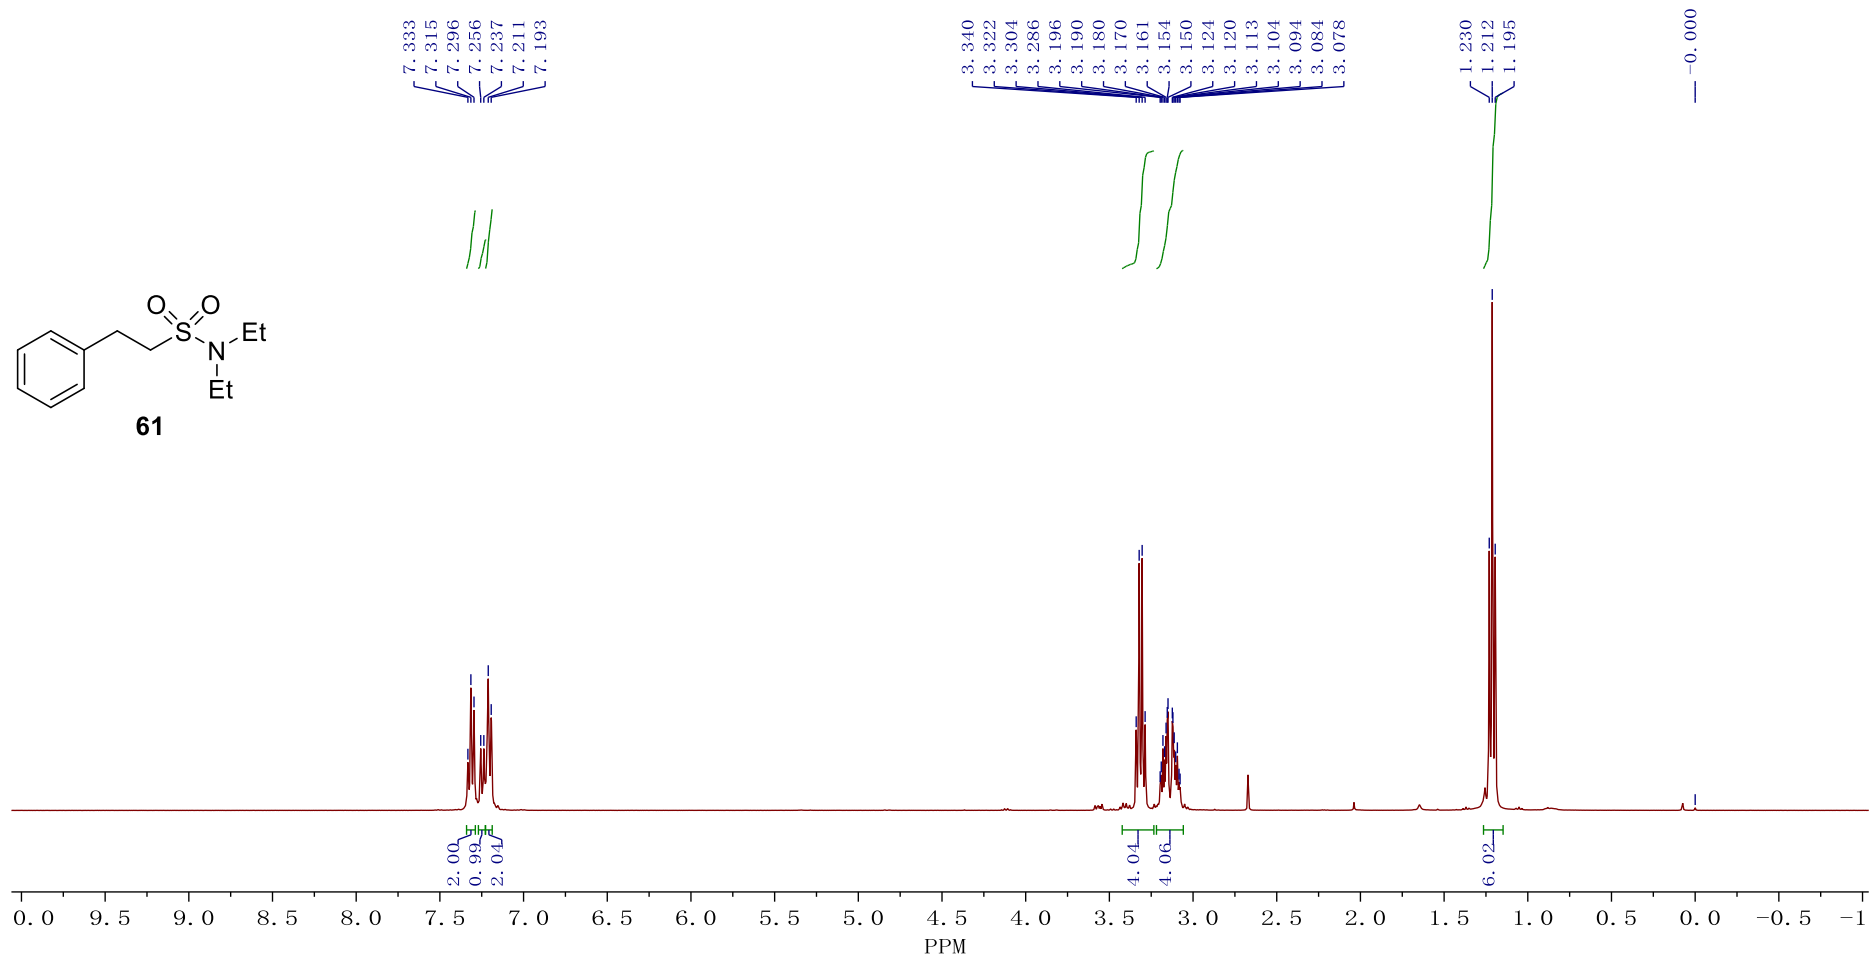

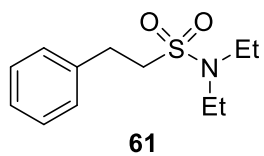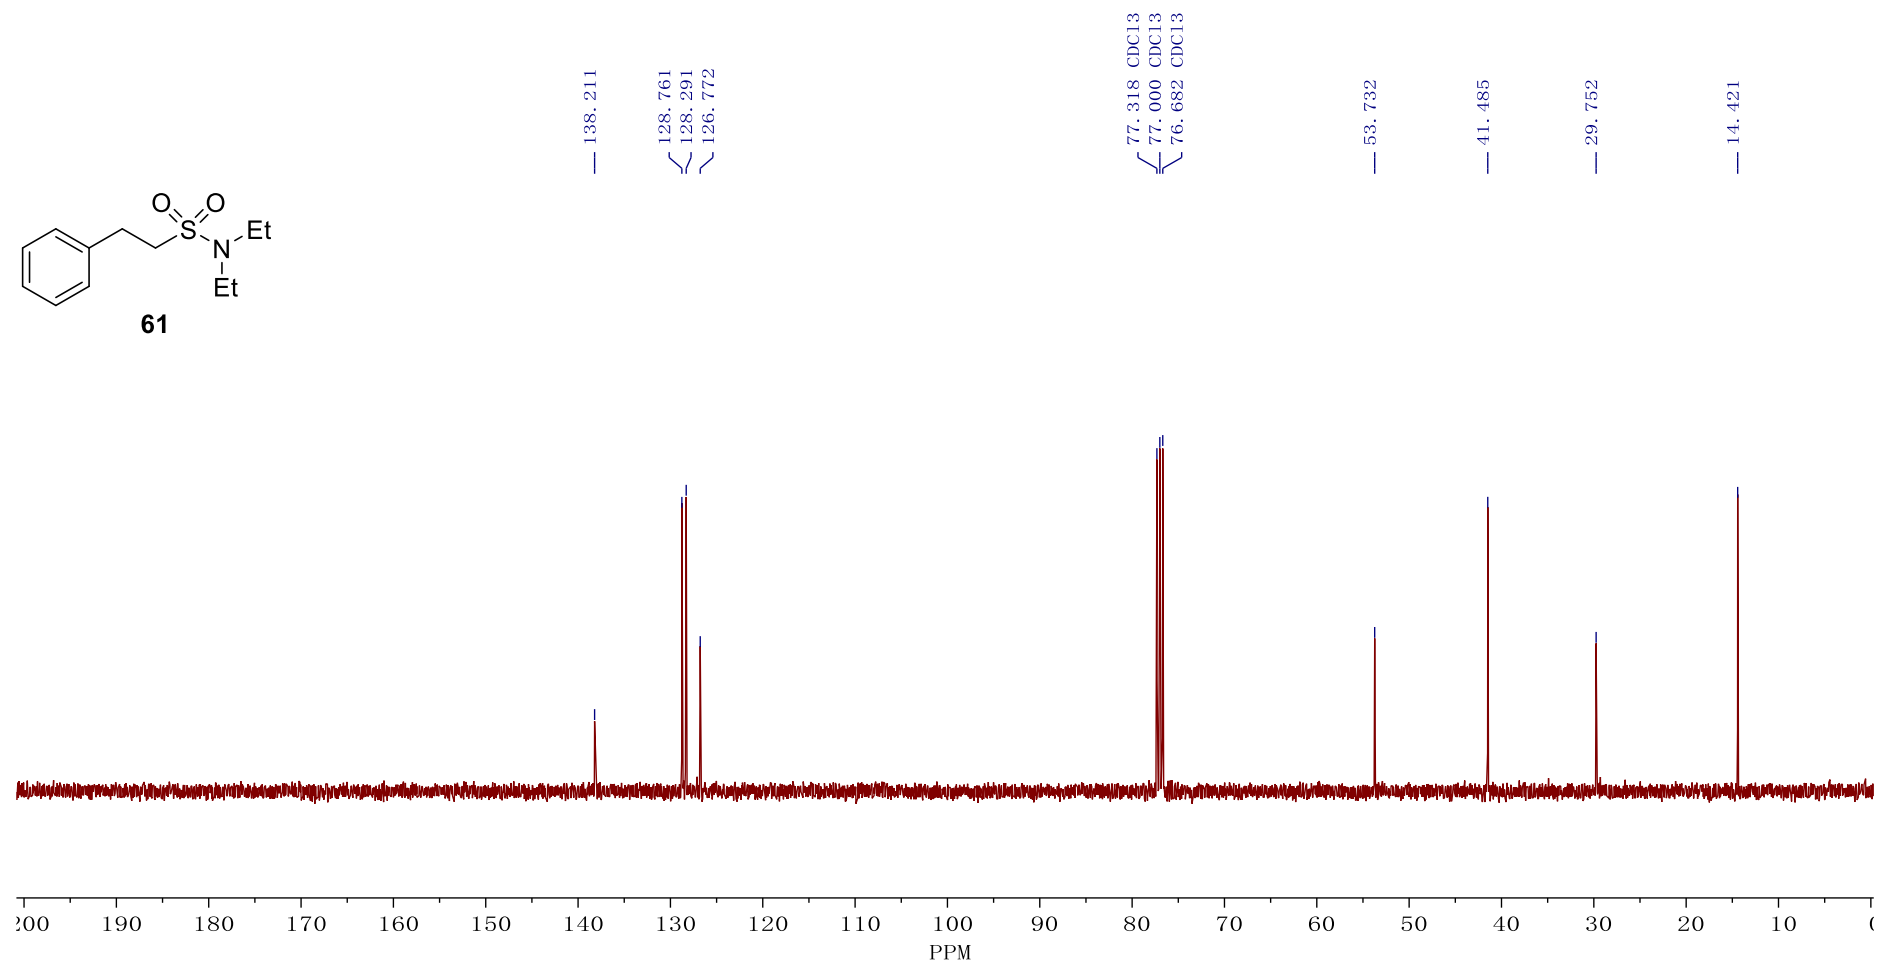

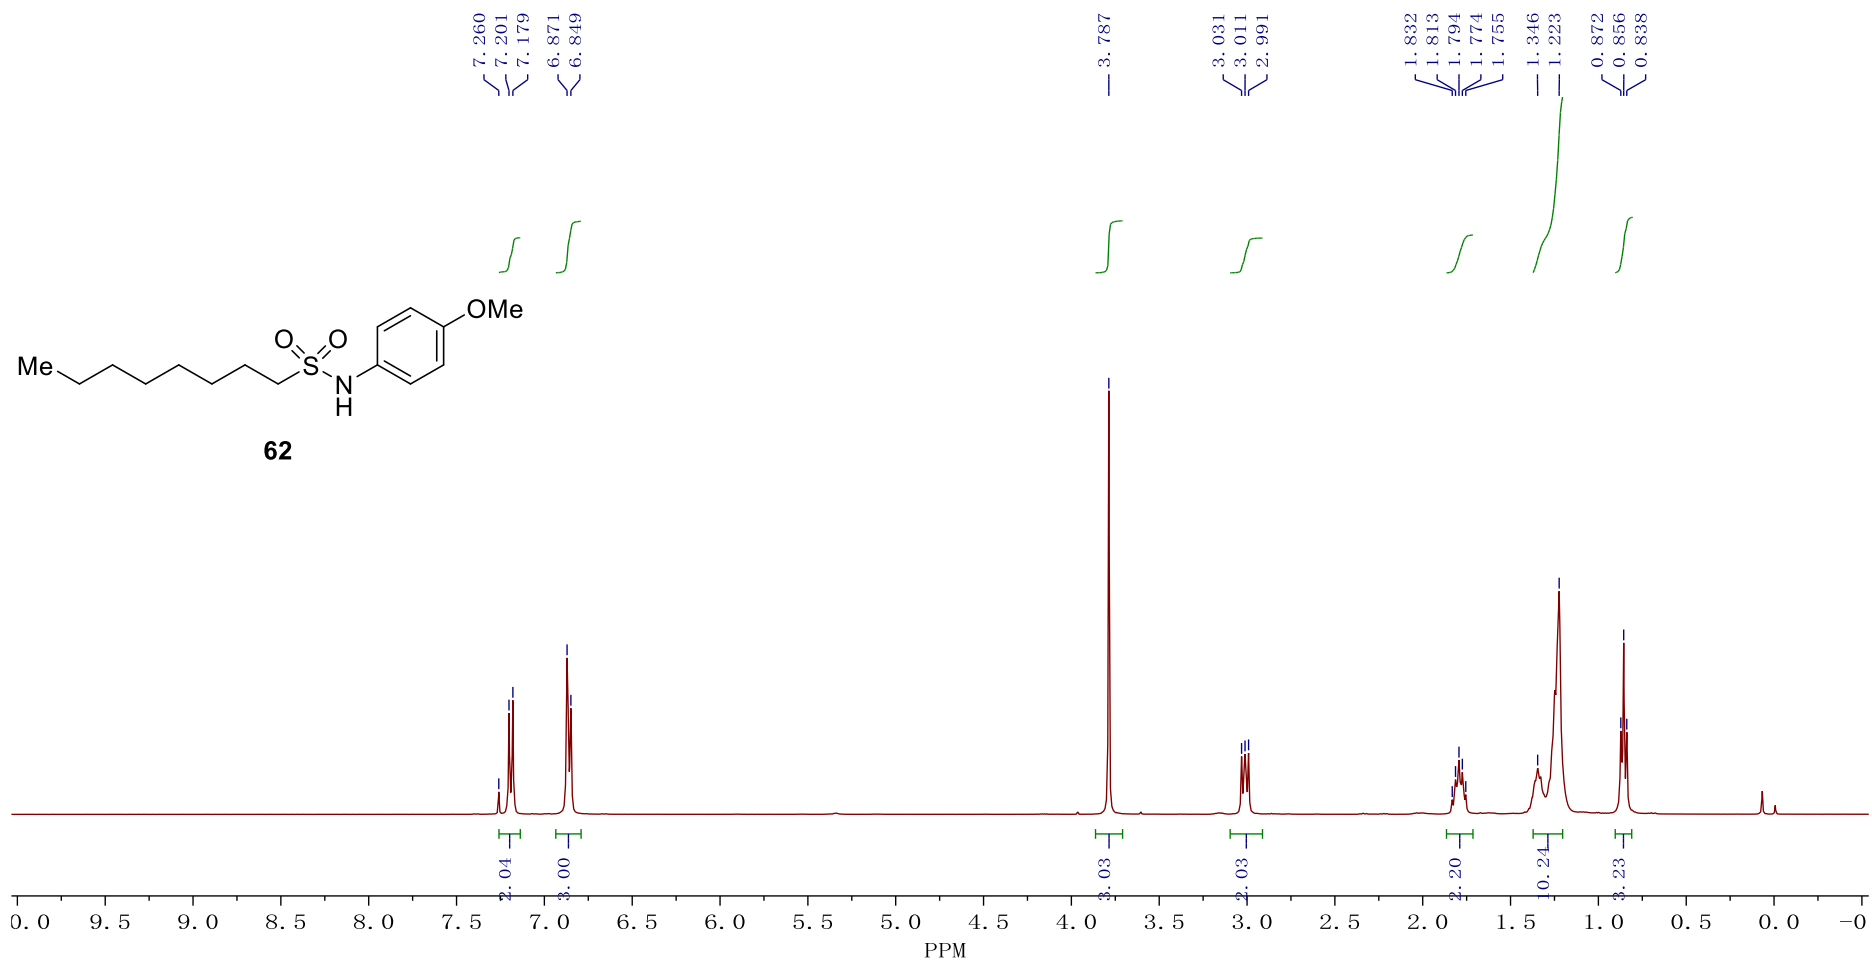

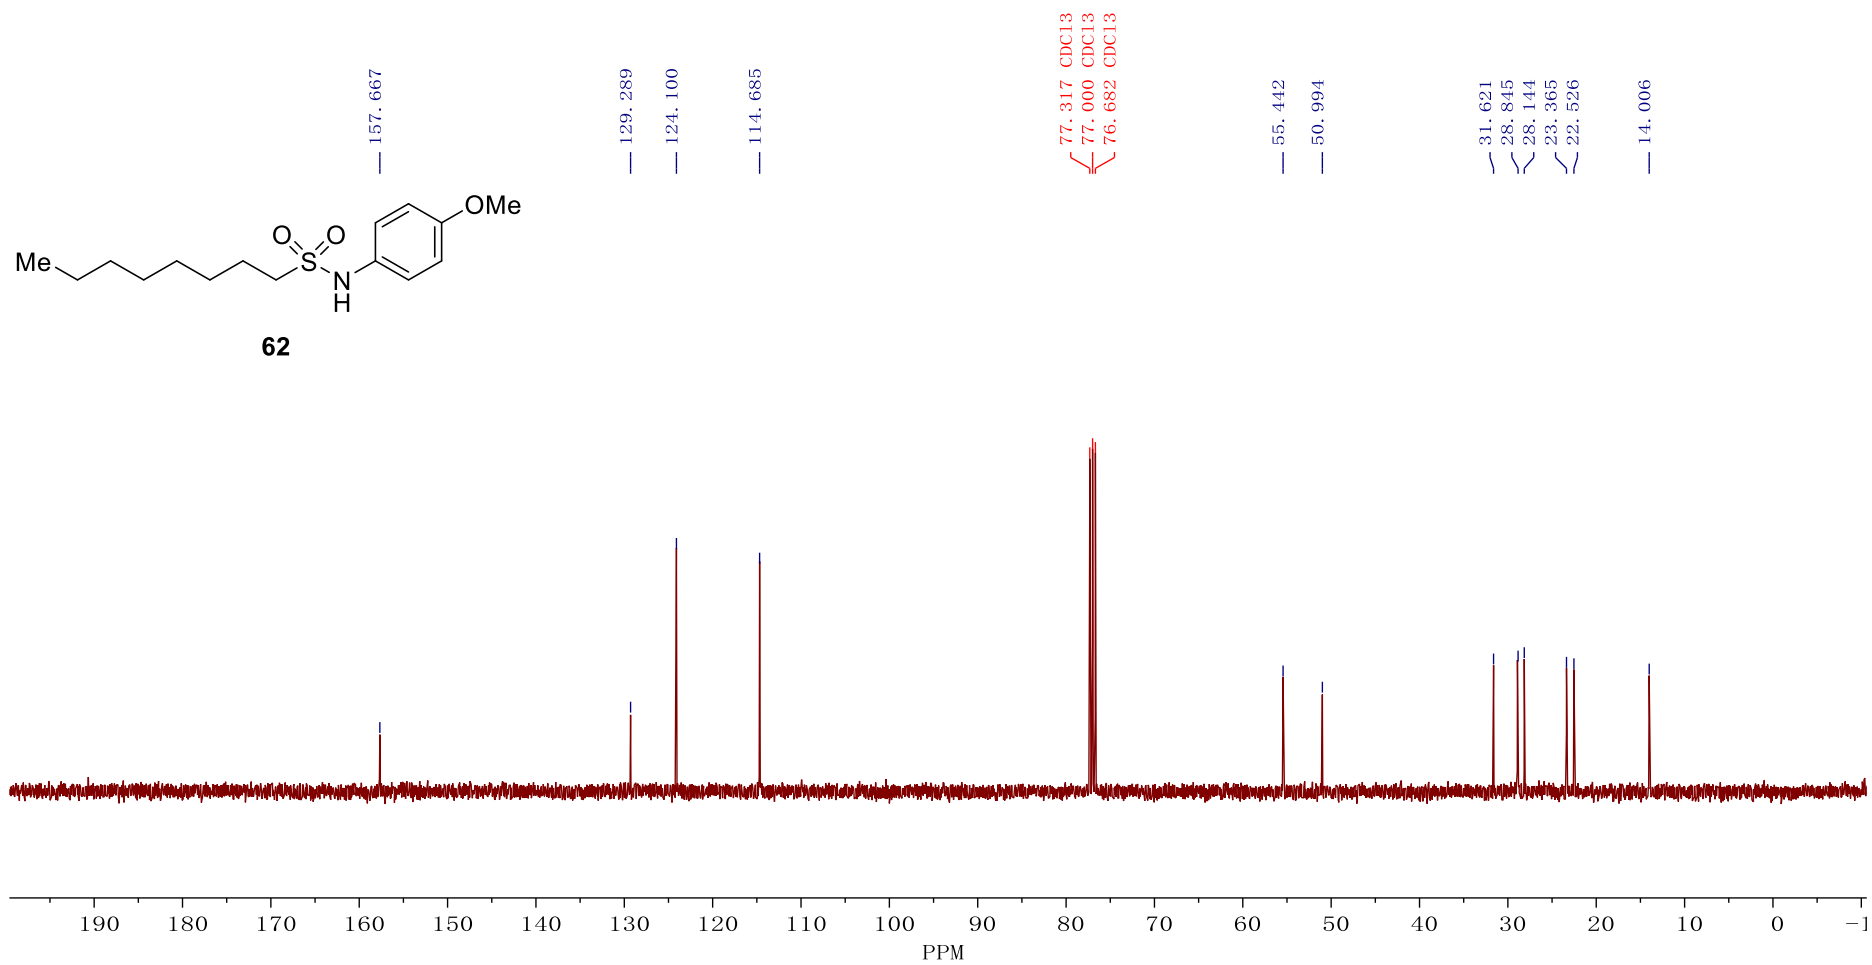

S174

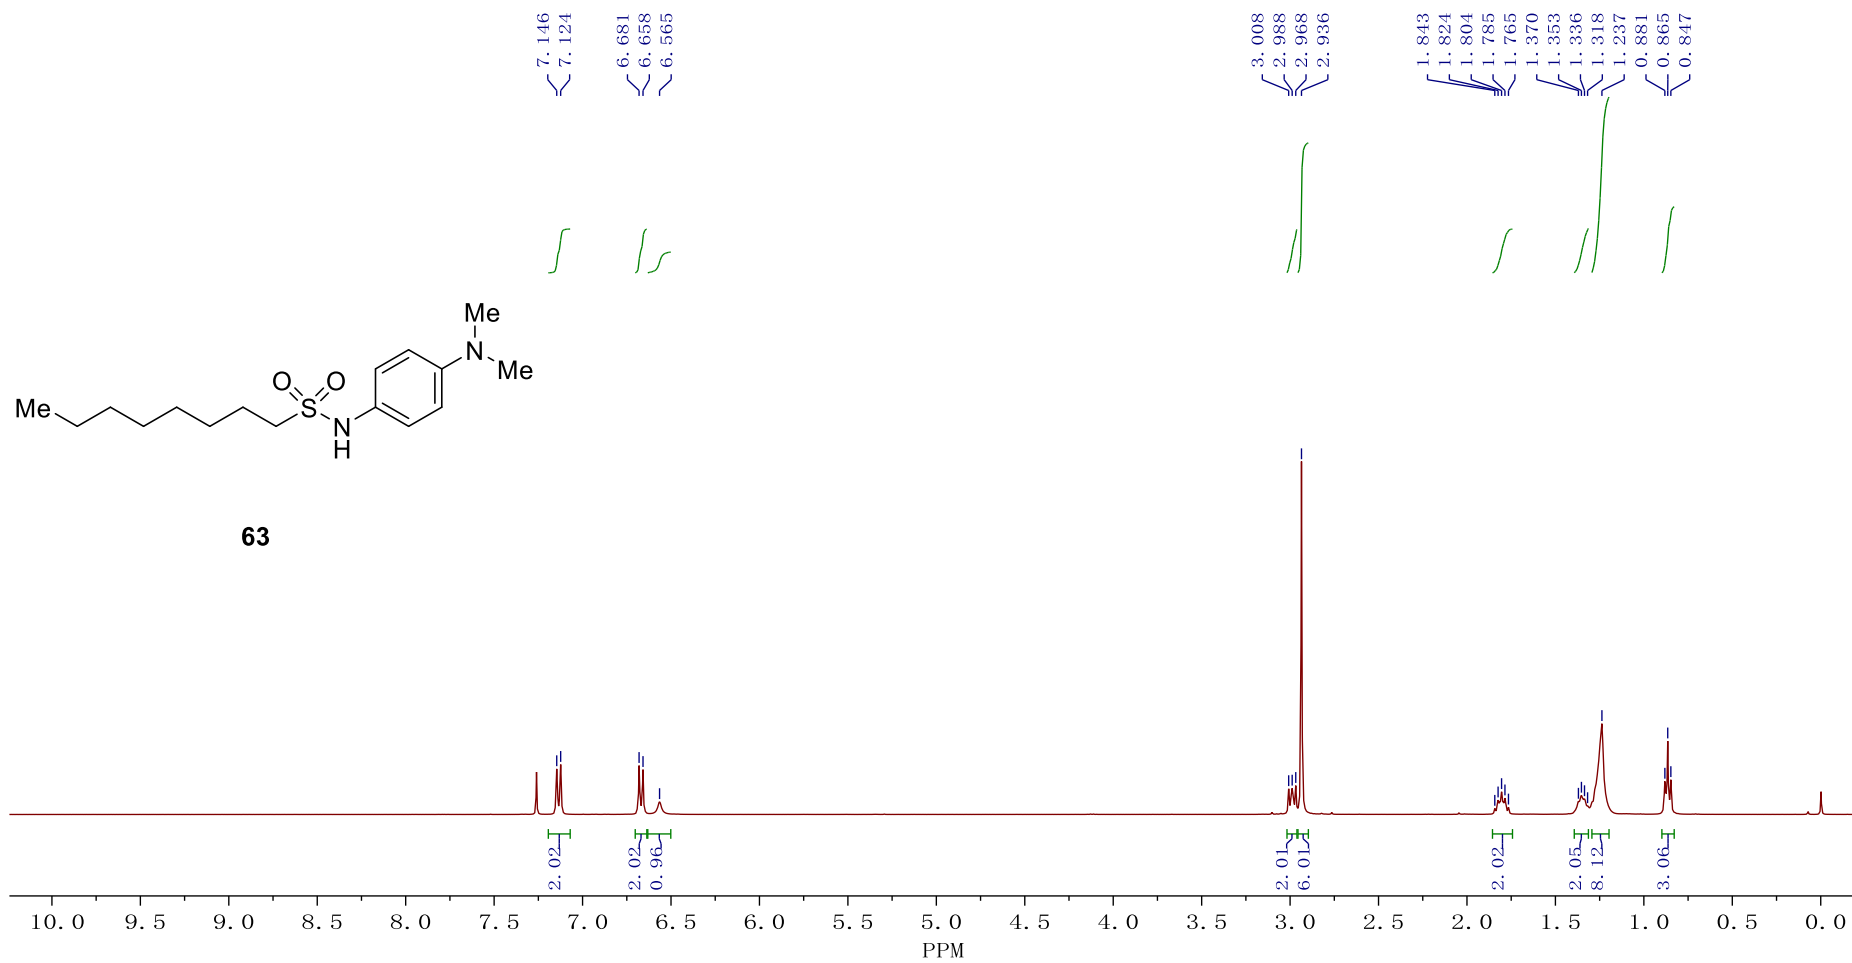

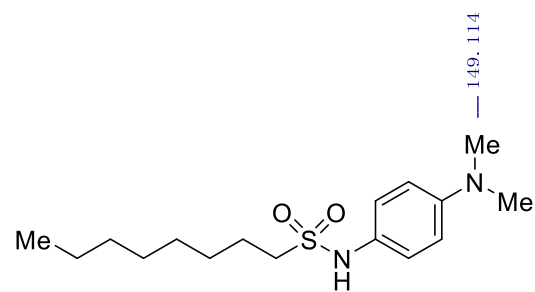

63

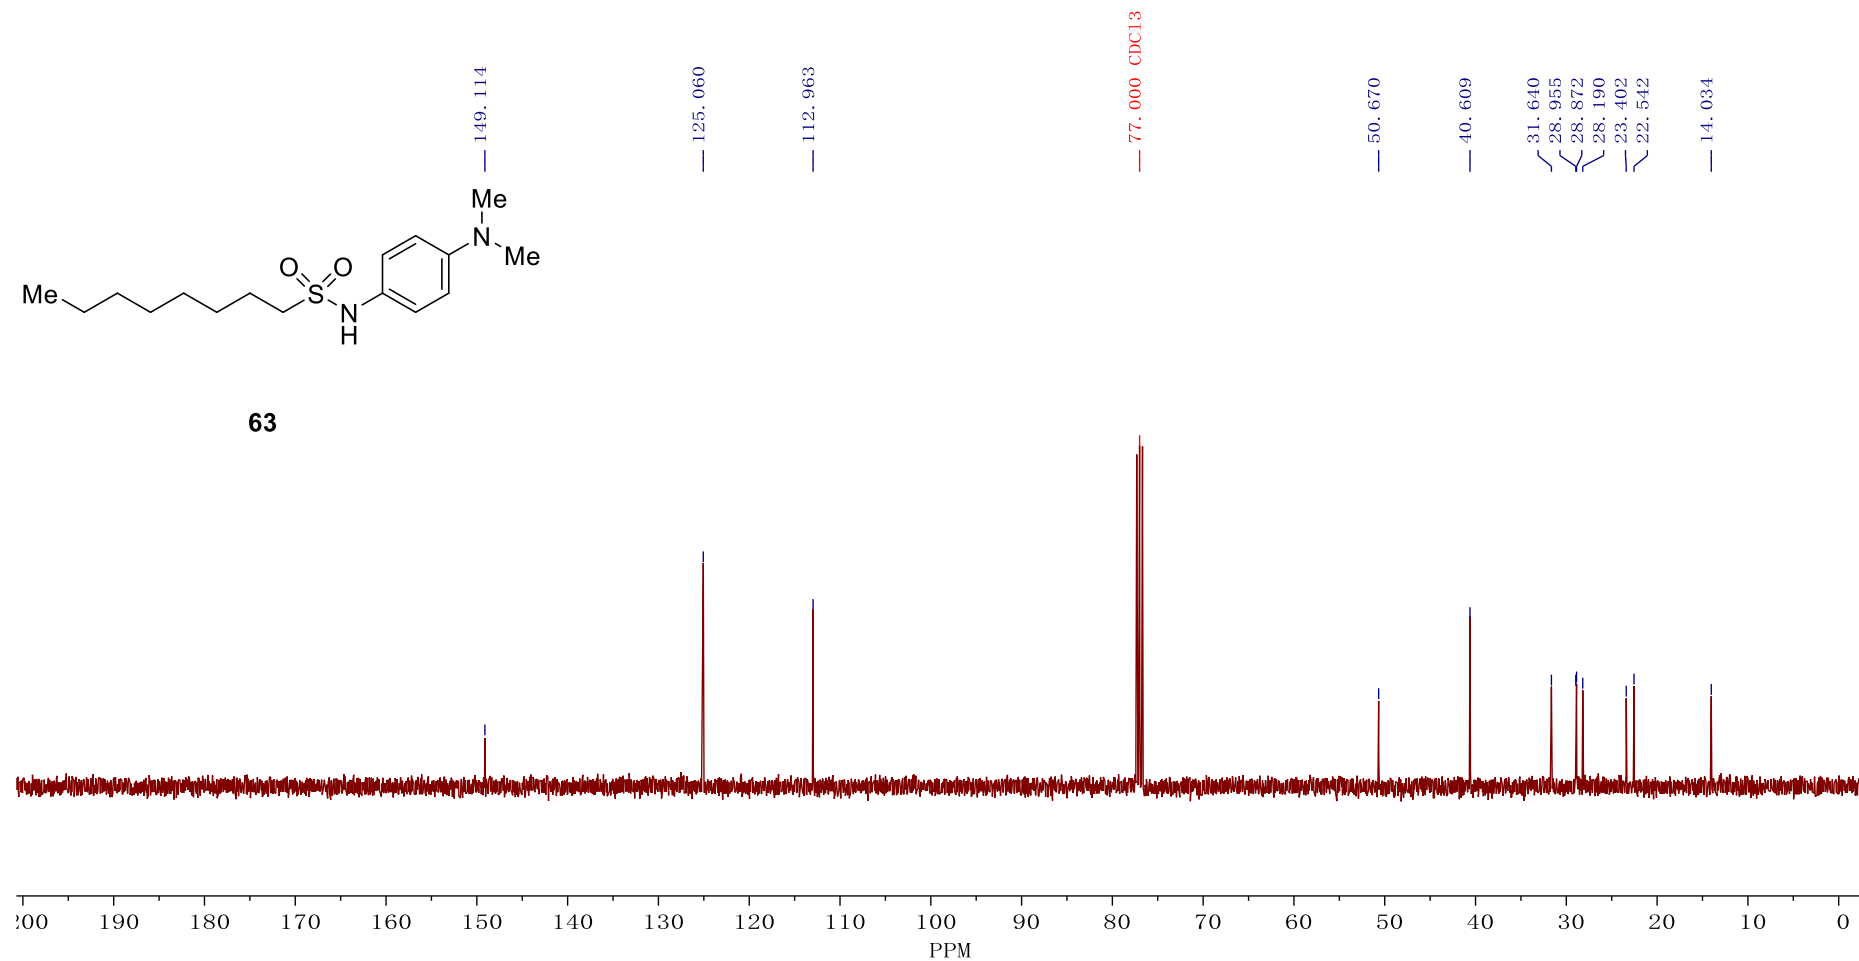

S176



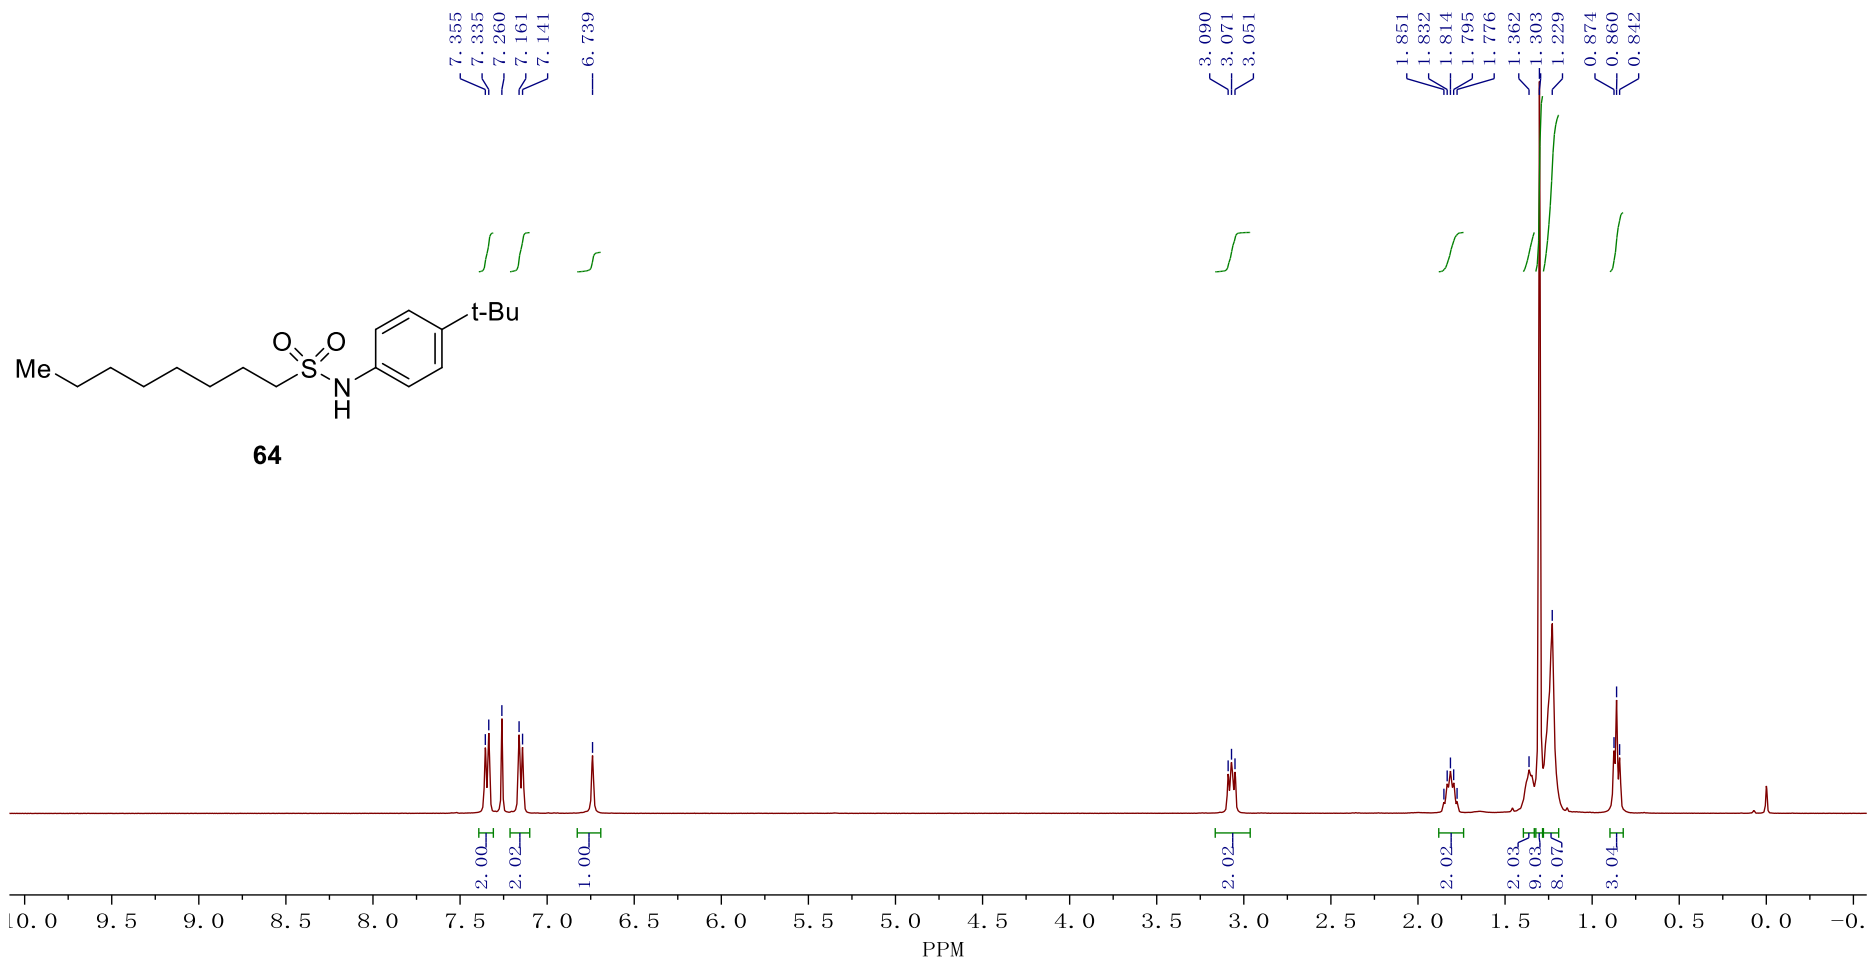

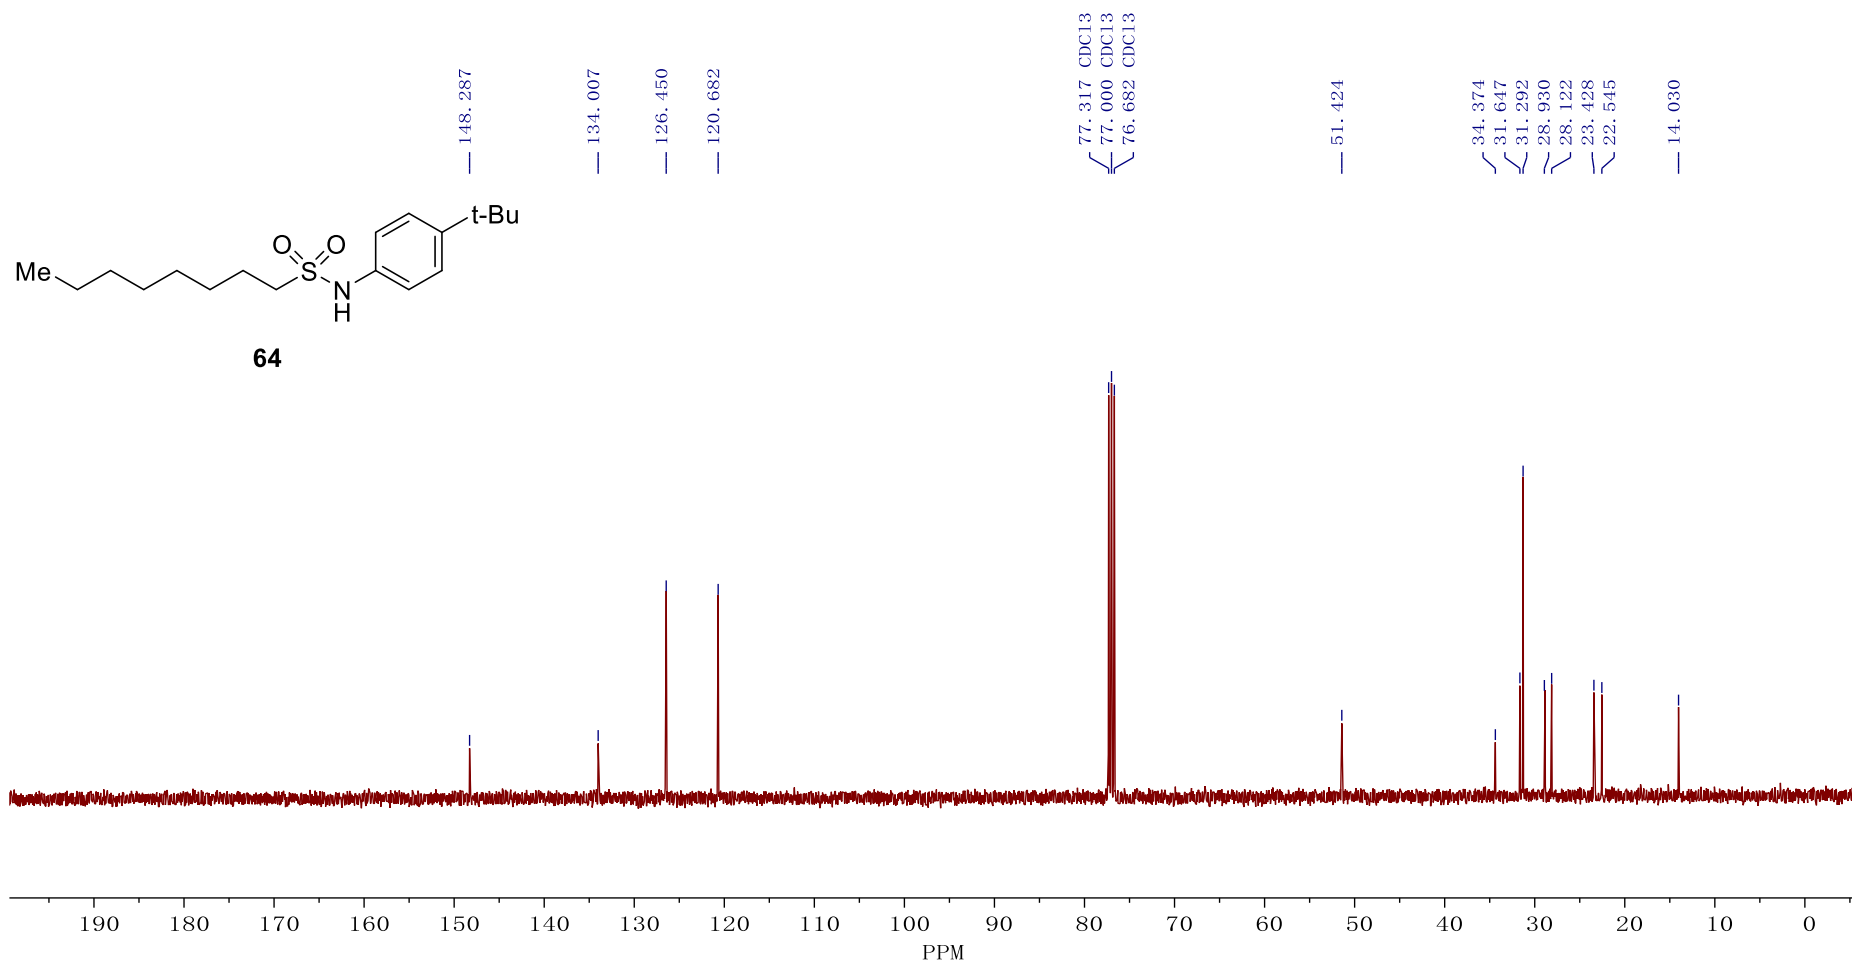

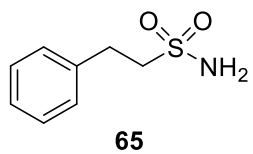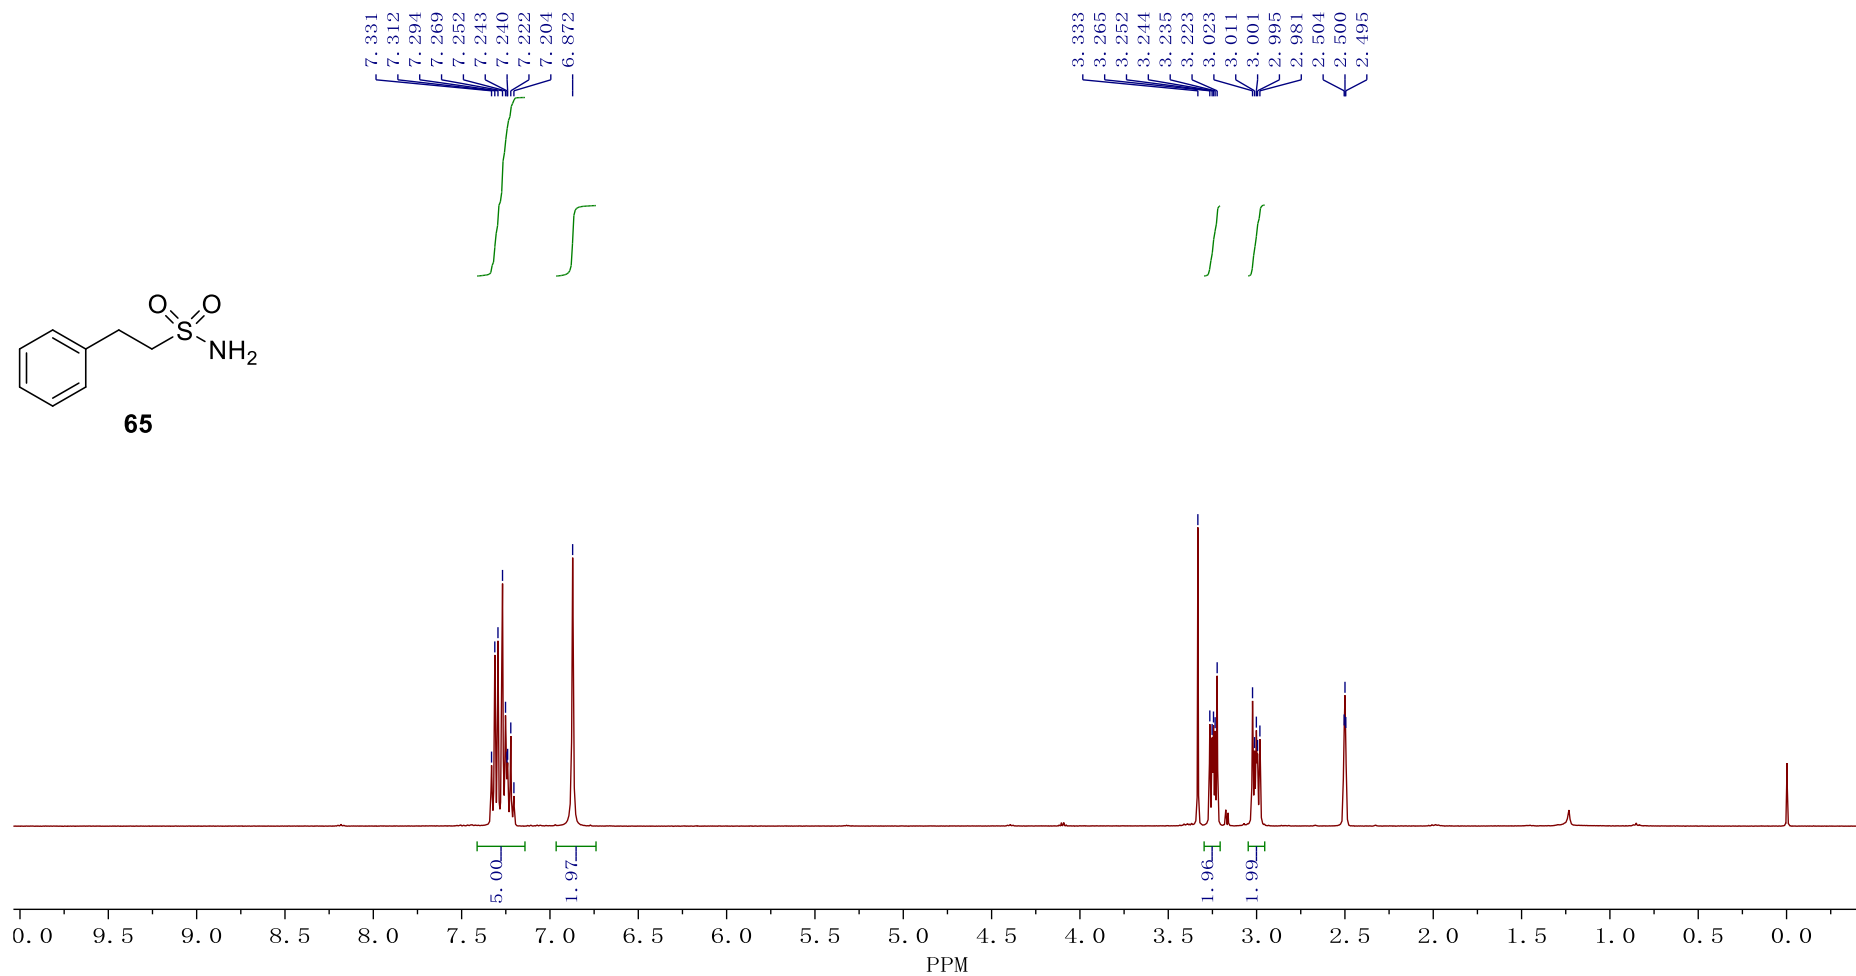

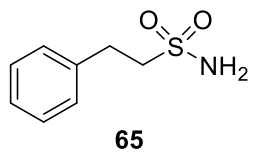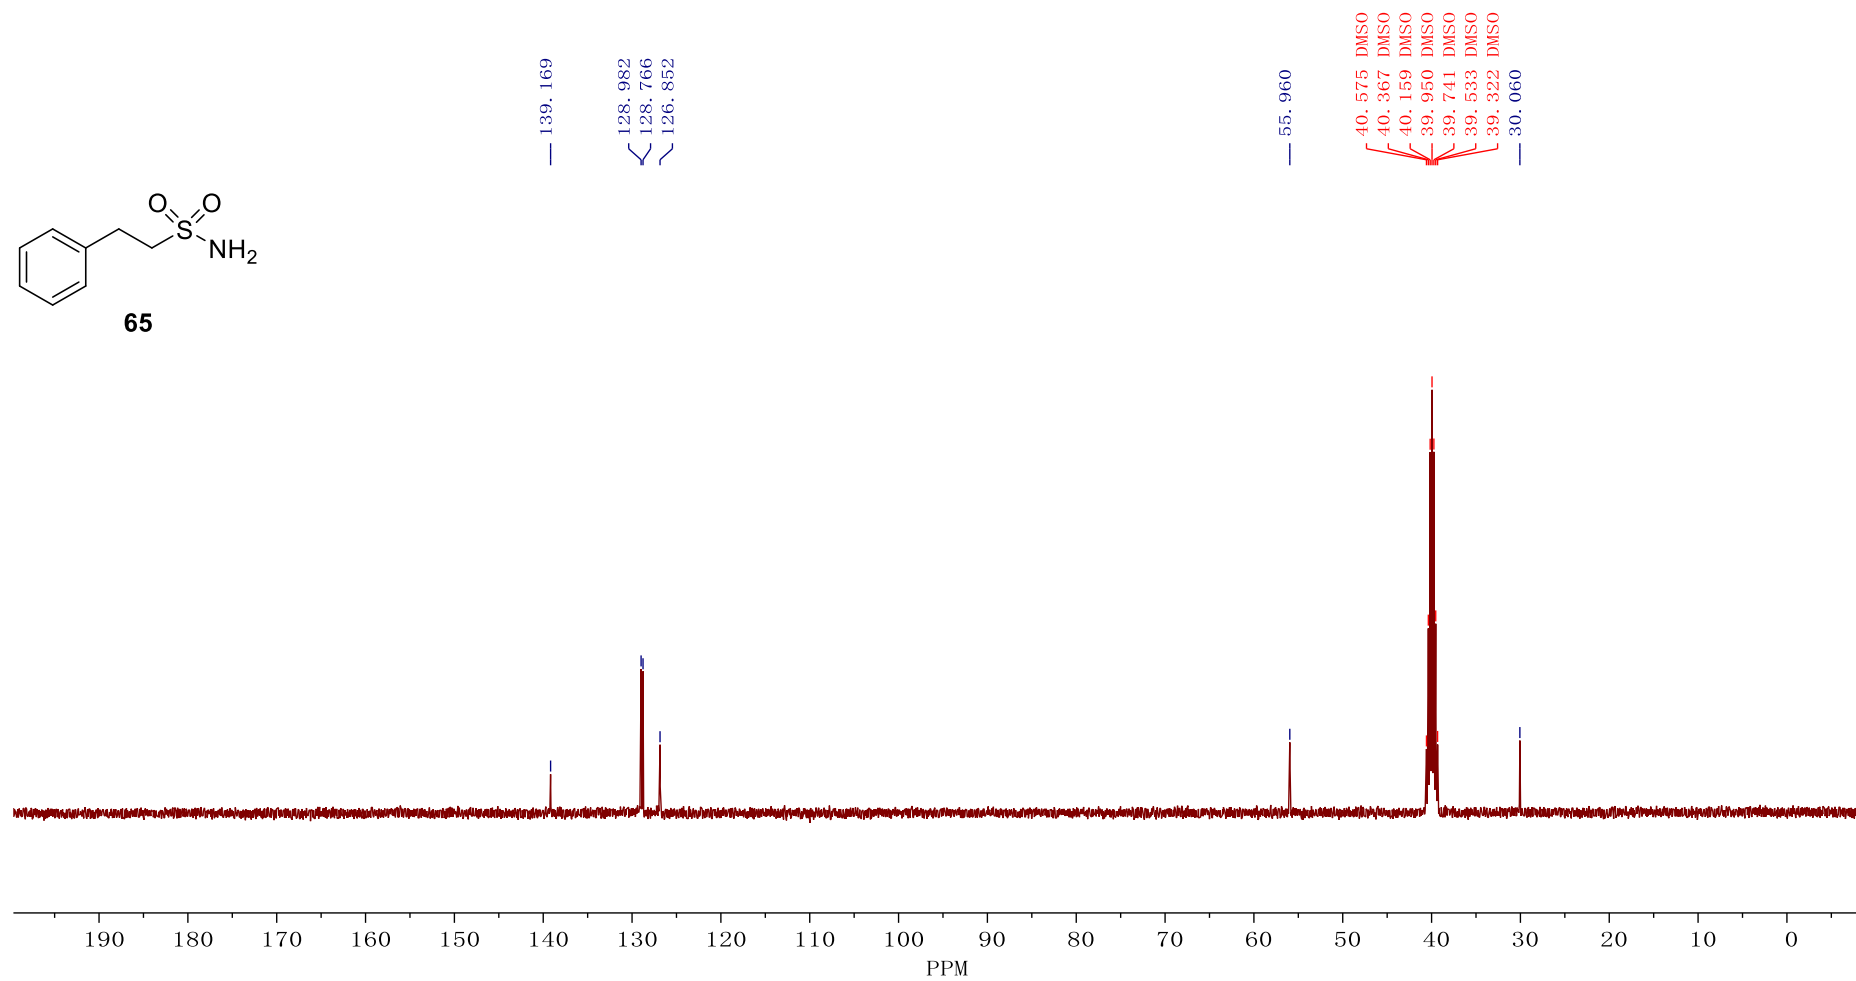

S180

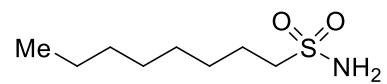

66

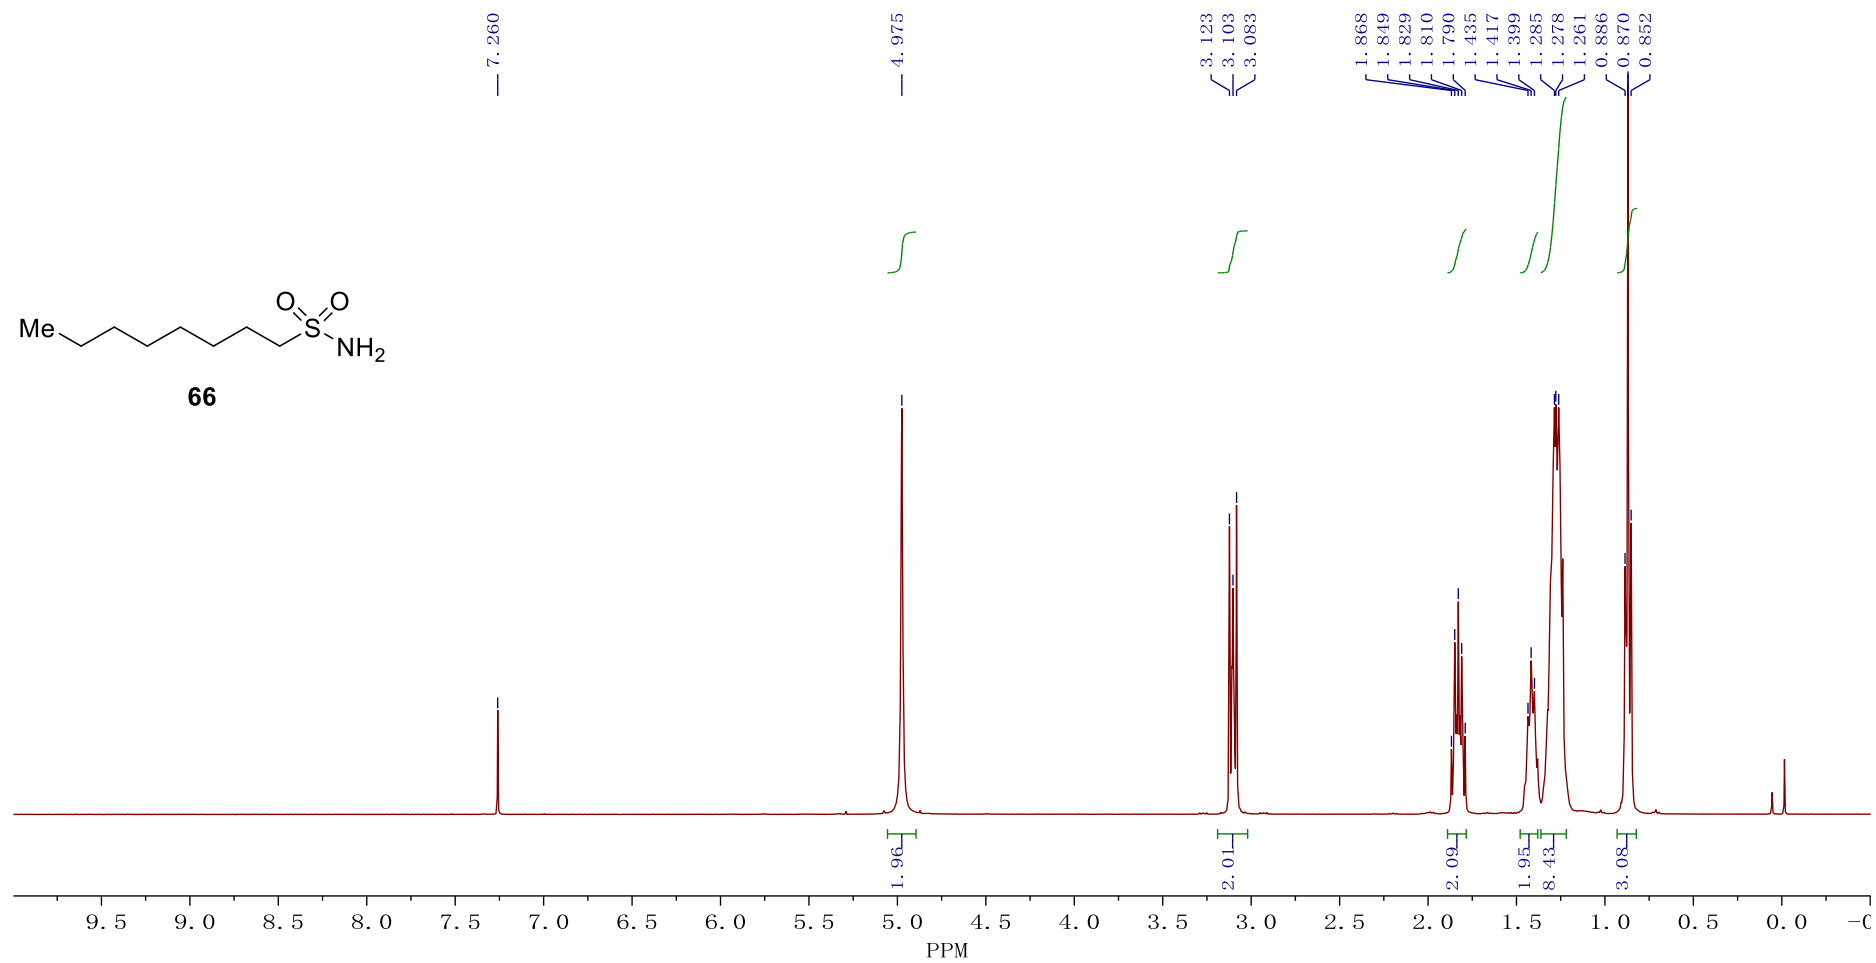

S181

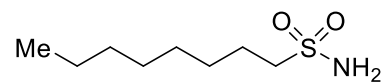

66

77.318 CDC13  
77.000 CDC13  
76.683 CDC13

55.244

31.665  
29.013  
28.926  
28.162  
23.850  
22.548

14.018

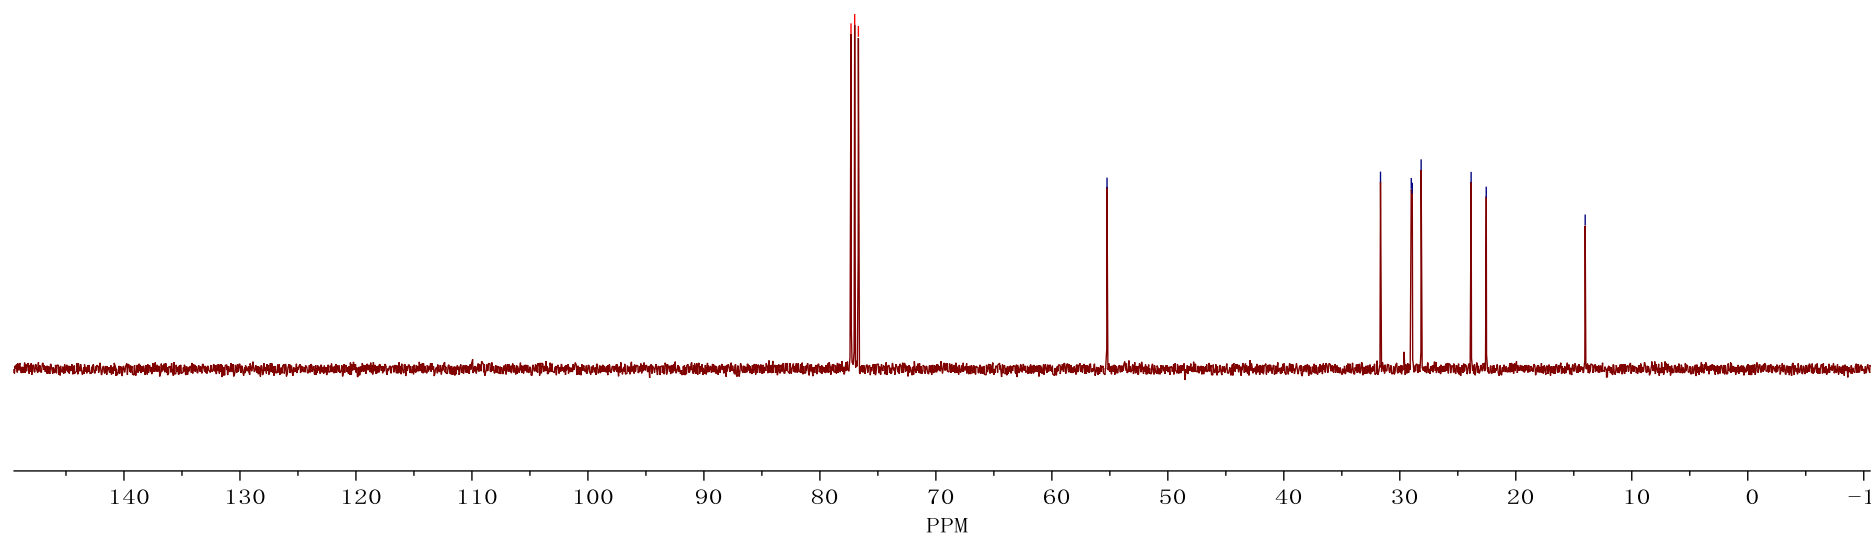

S182

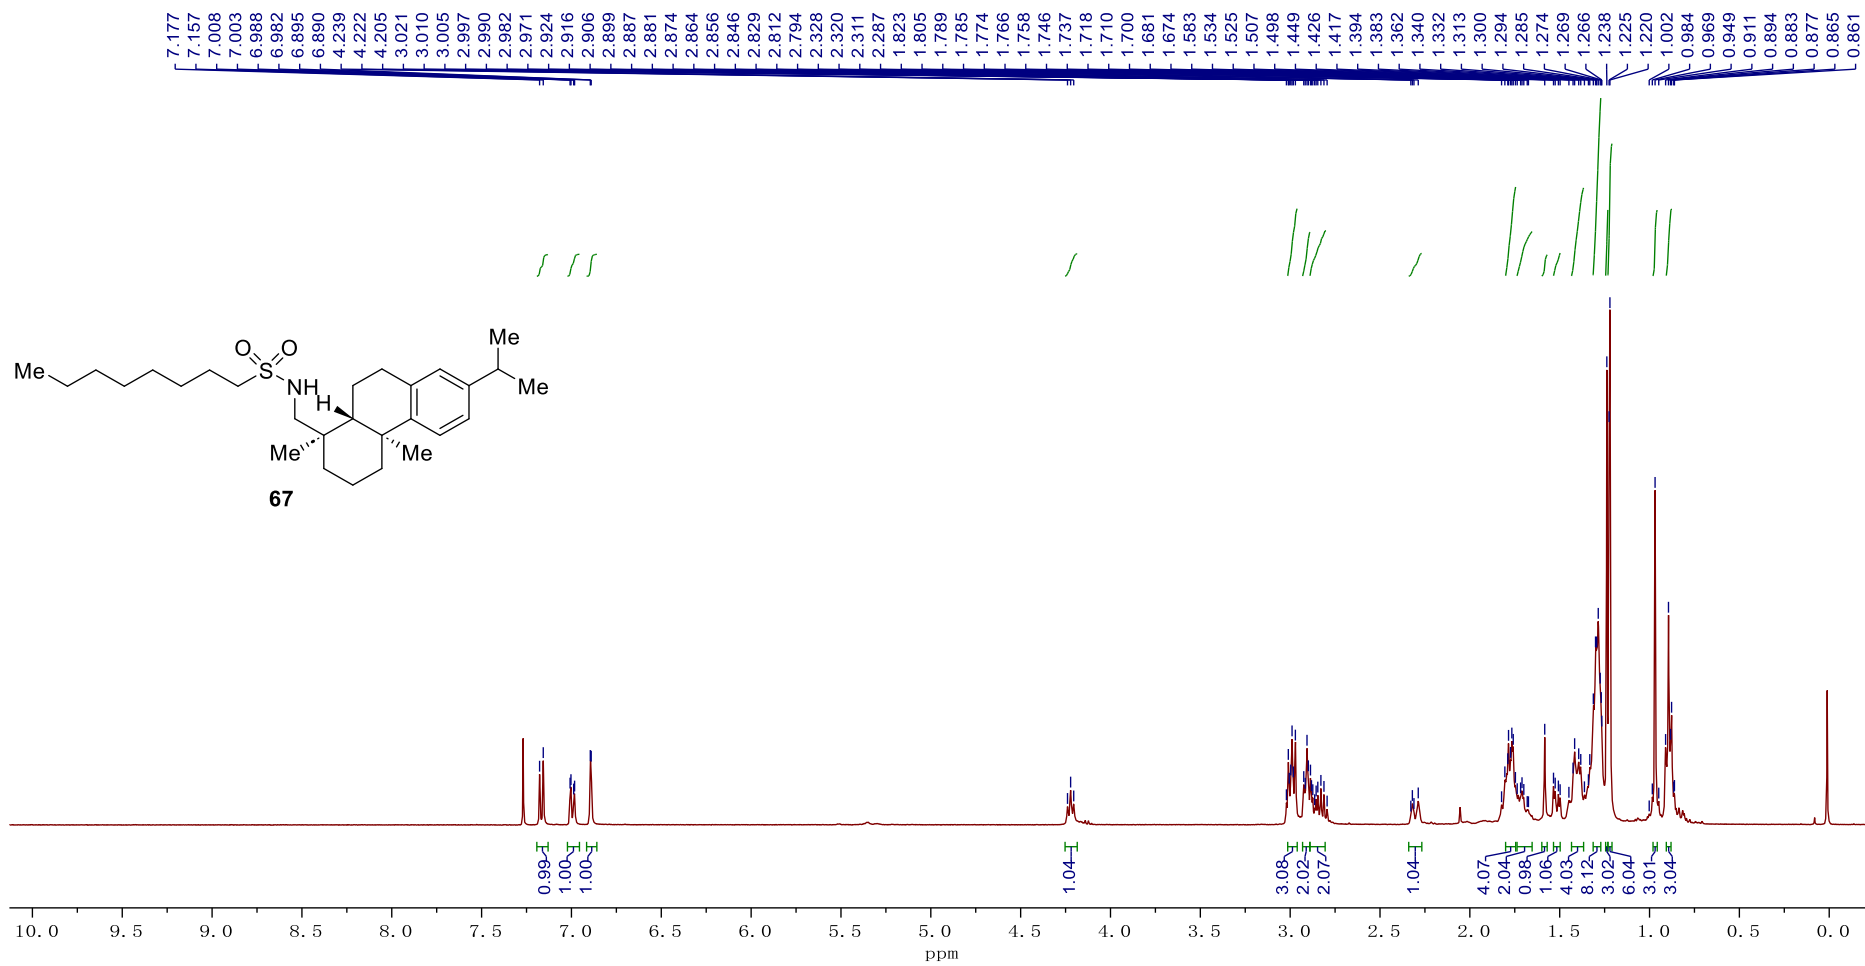

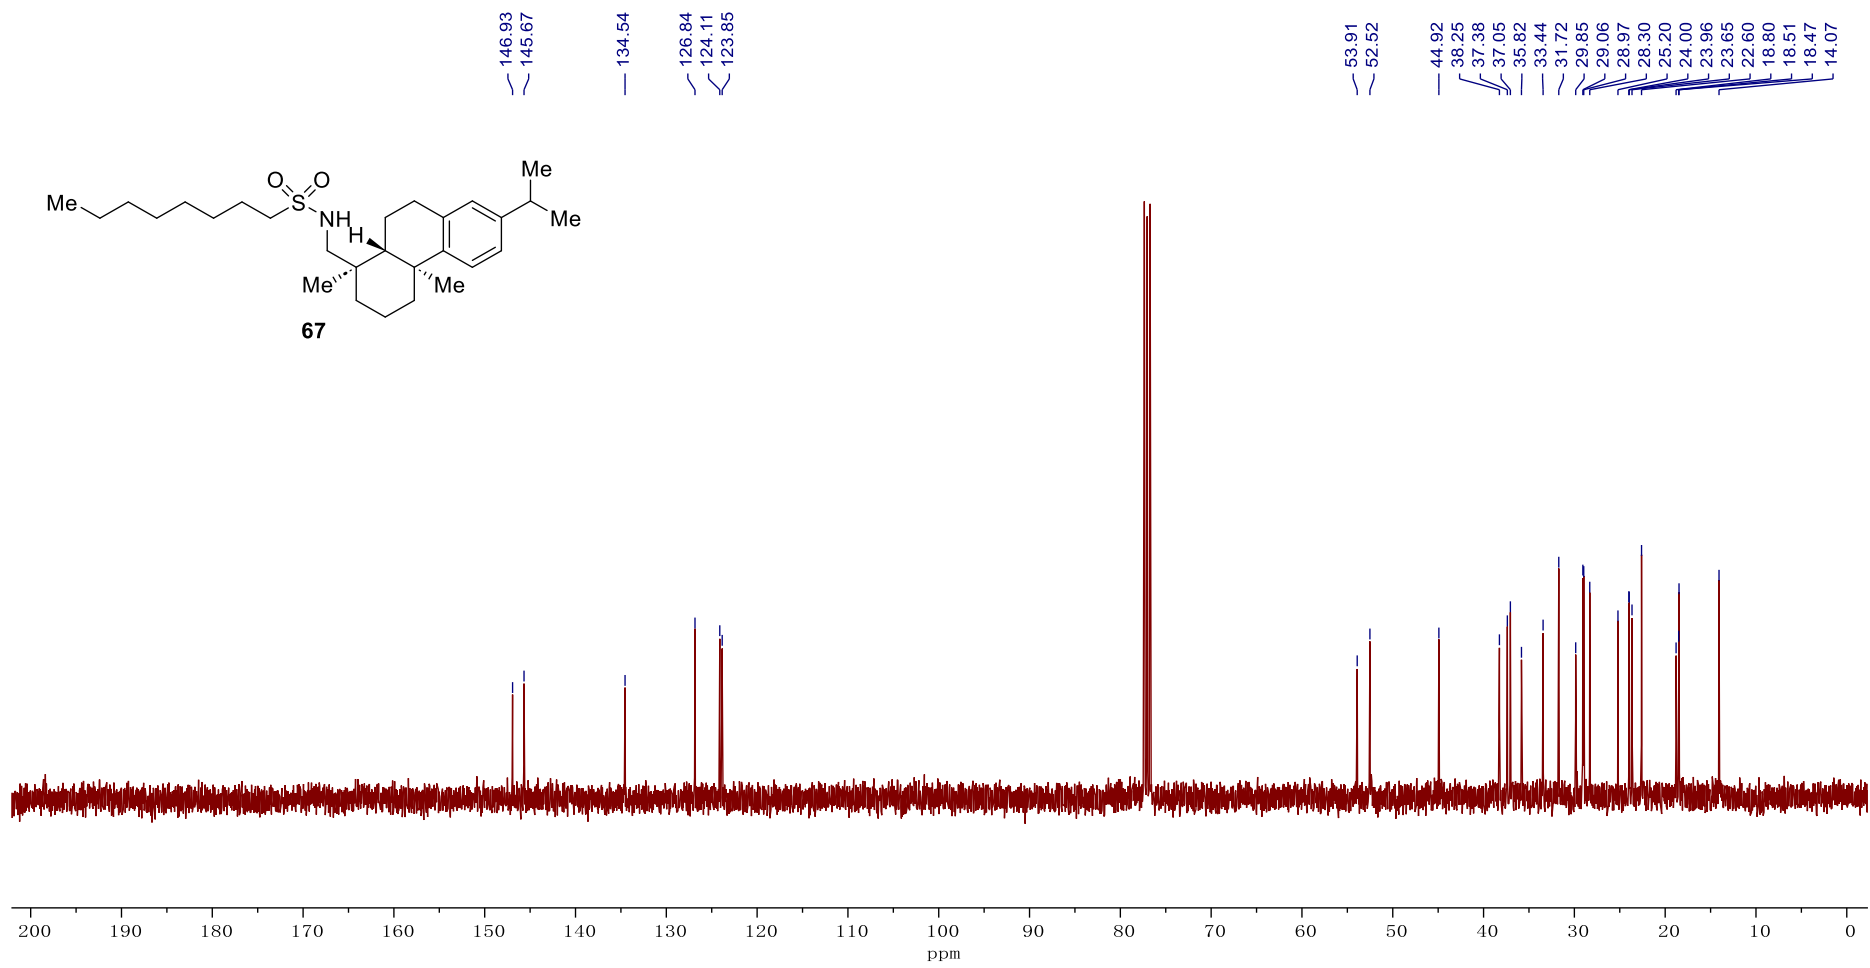



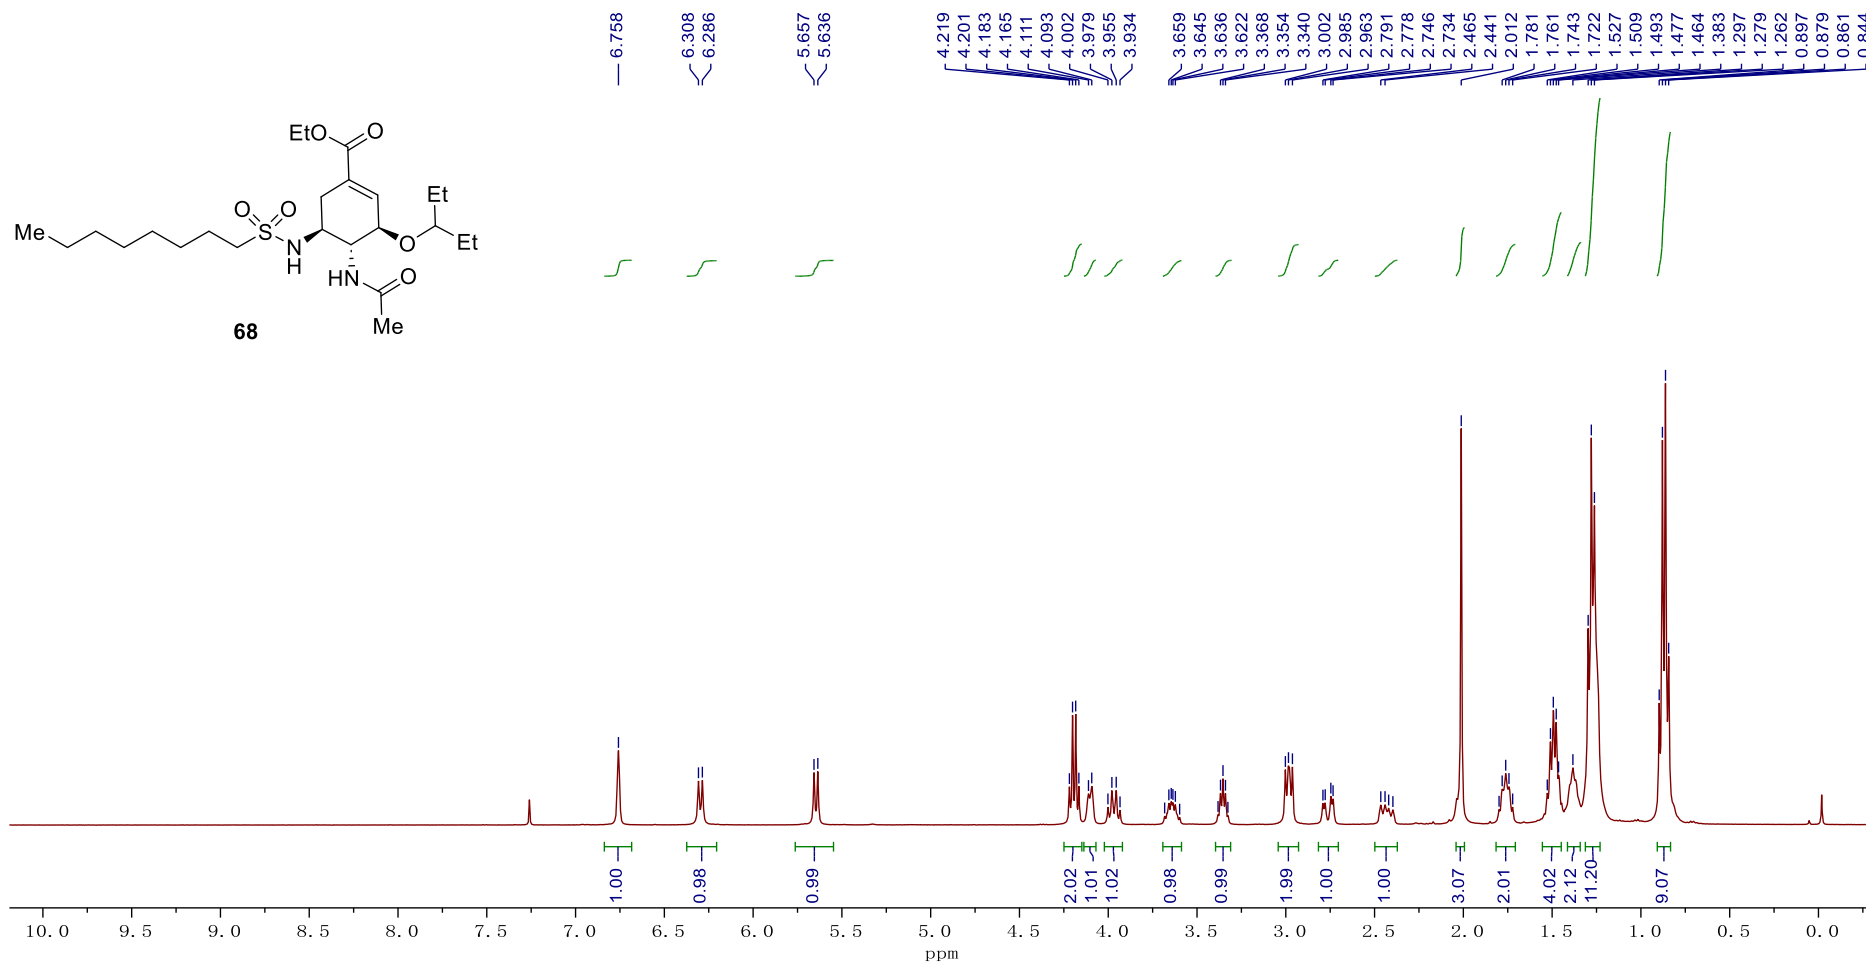

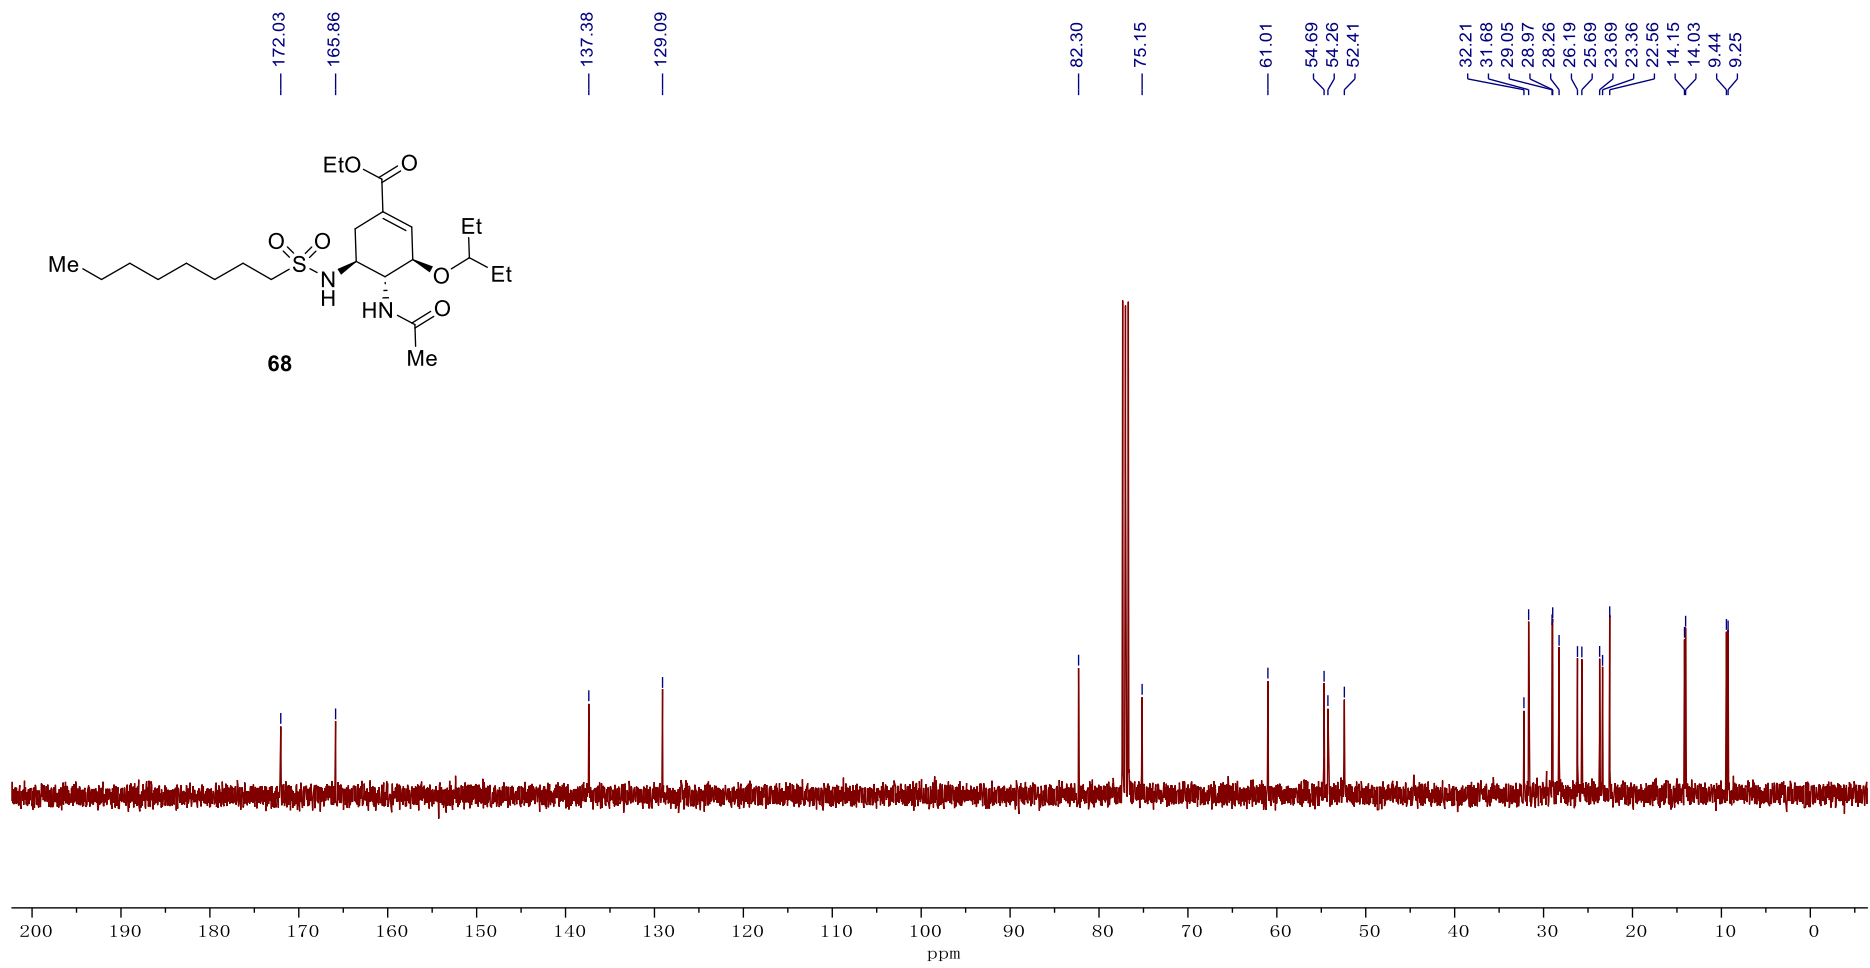

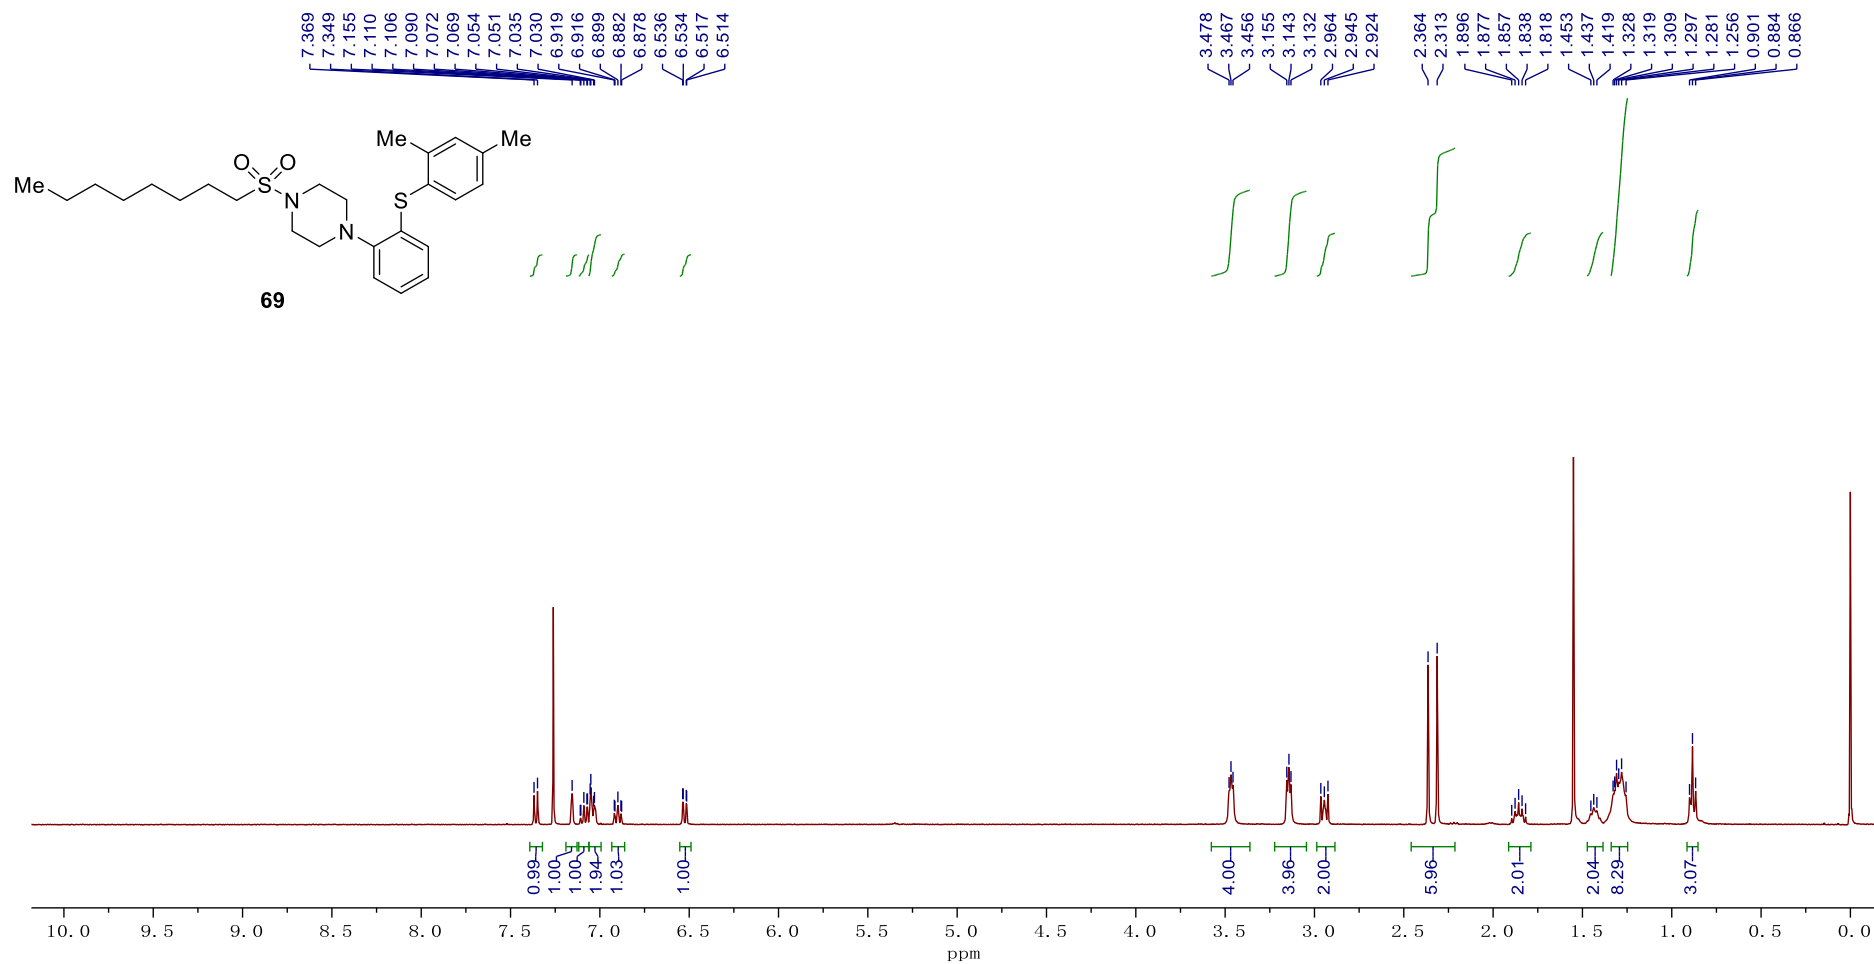

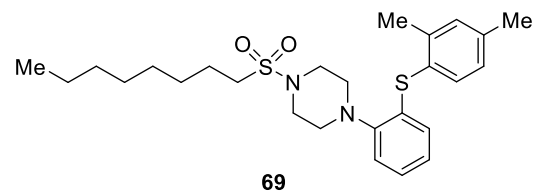

148.25  
142.19  
139.27  
136.01  
134.47  
131.66  
127.79  
127.46  
126.24  
125.57  
124.90  
120.05

77.32  
77.00  
76.68

51.39  
48.85  
46.23

31.64  
28.98  
28.89  
28.49  
22.92  
22.52  
21.10  
20.49  
14.00

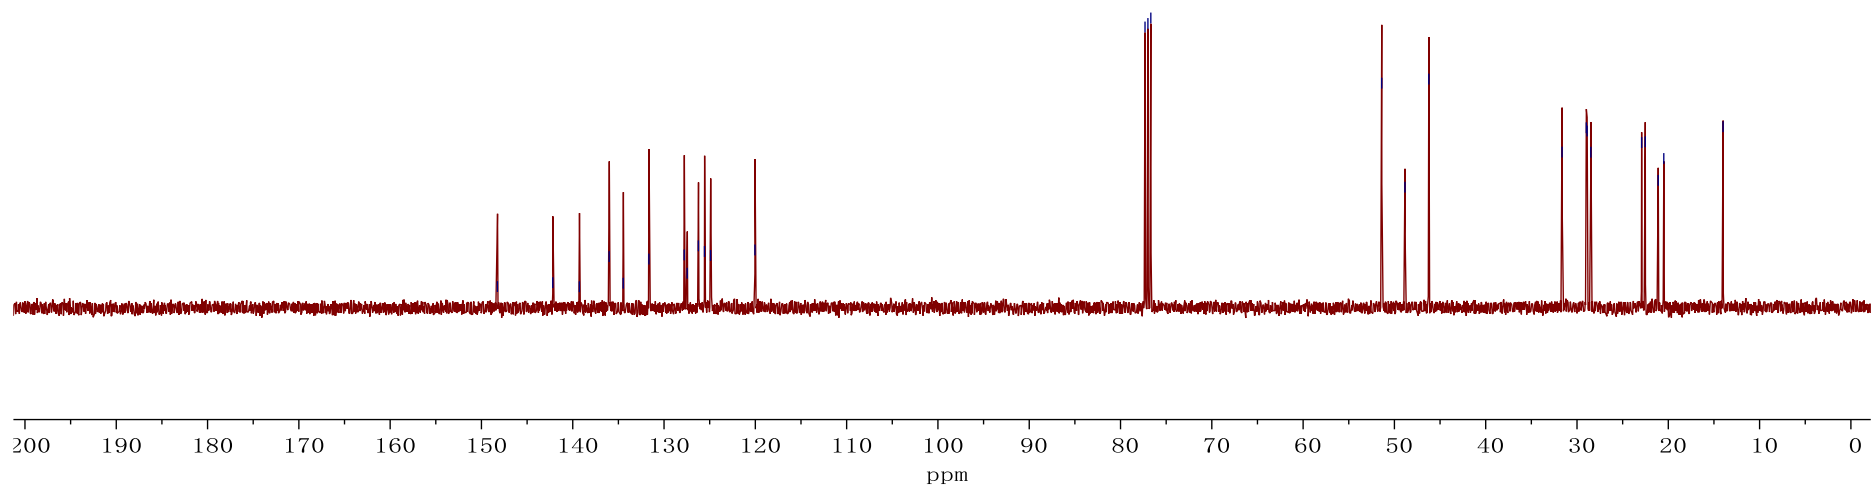

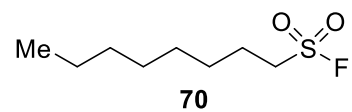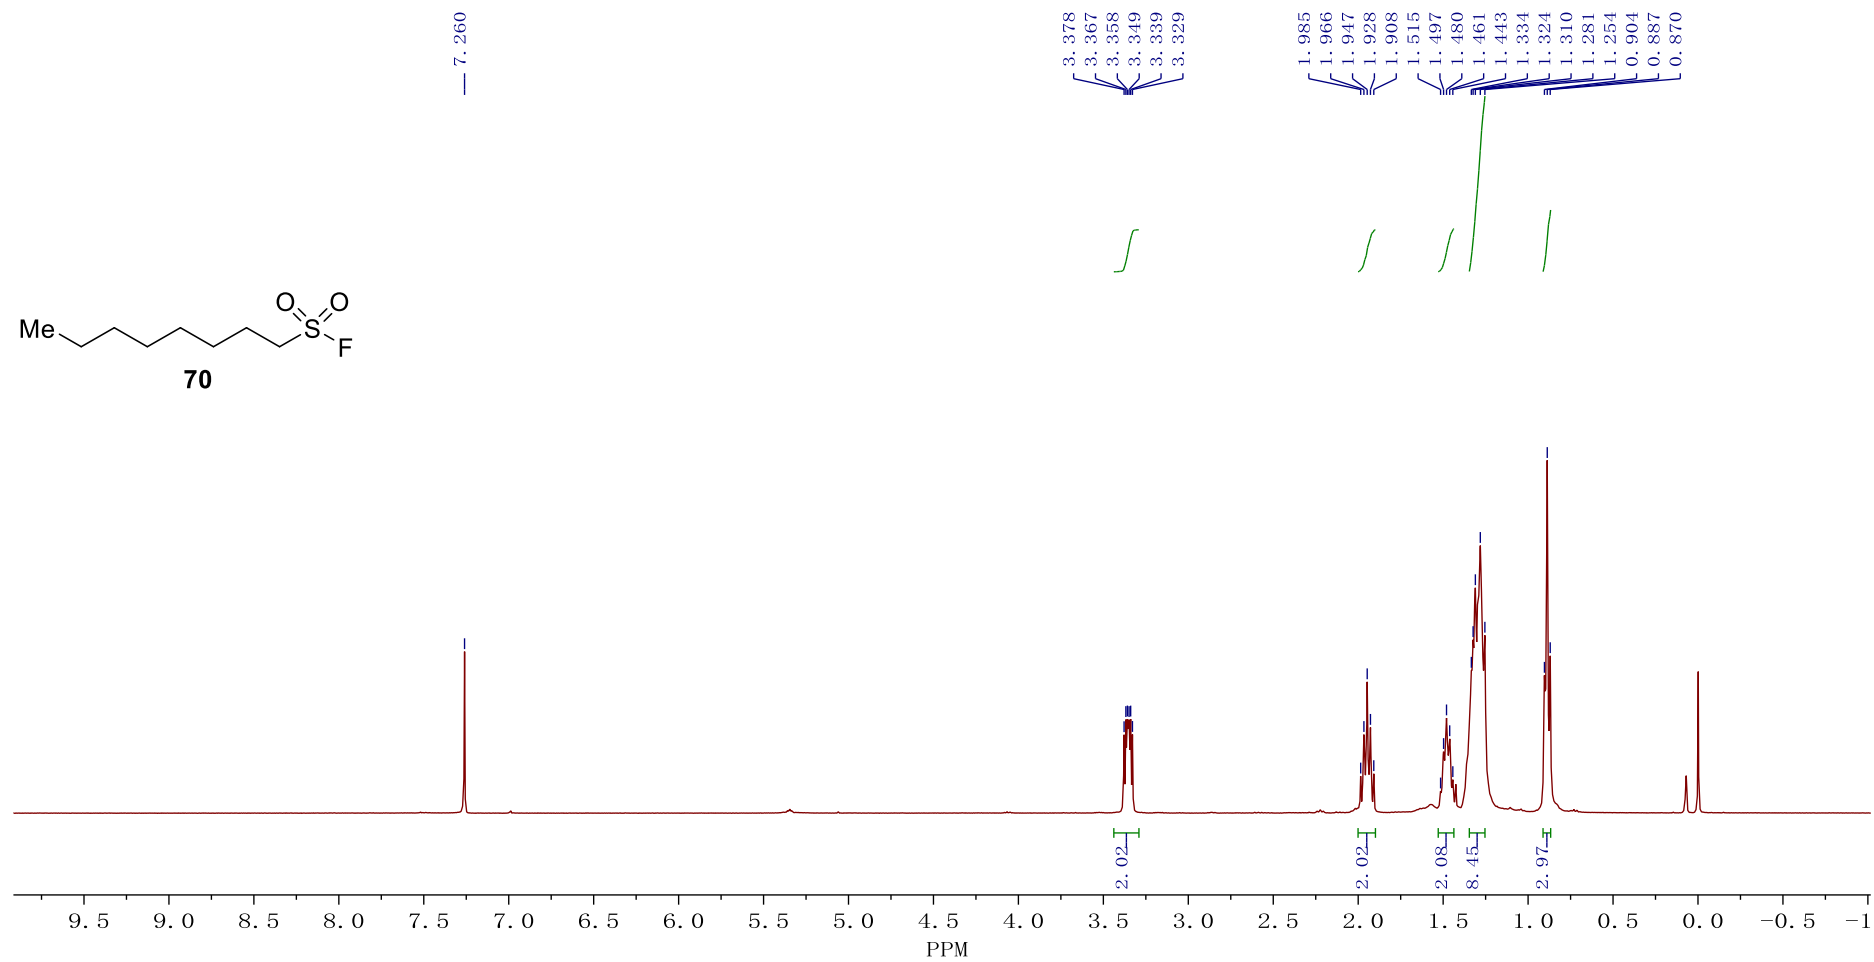

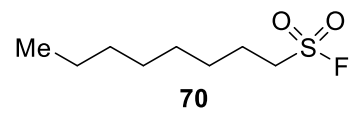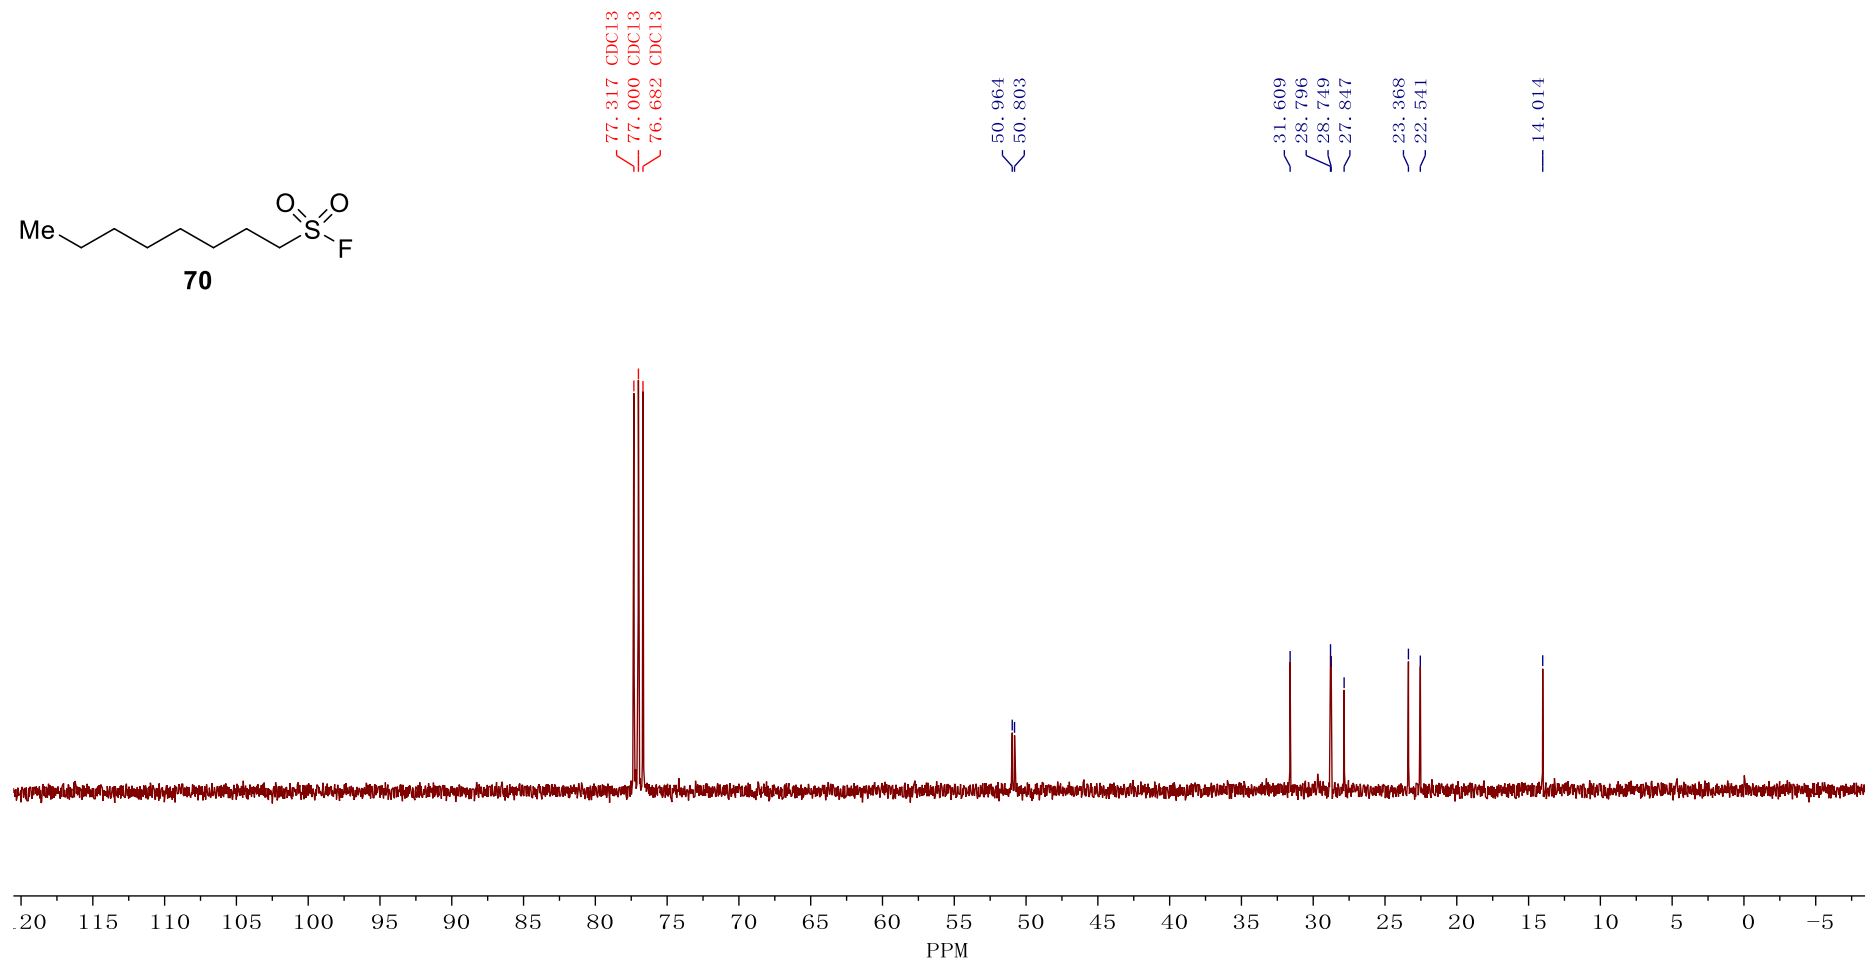

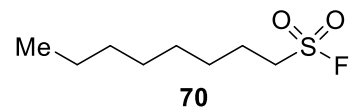

53.265

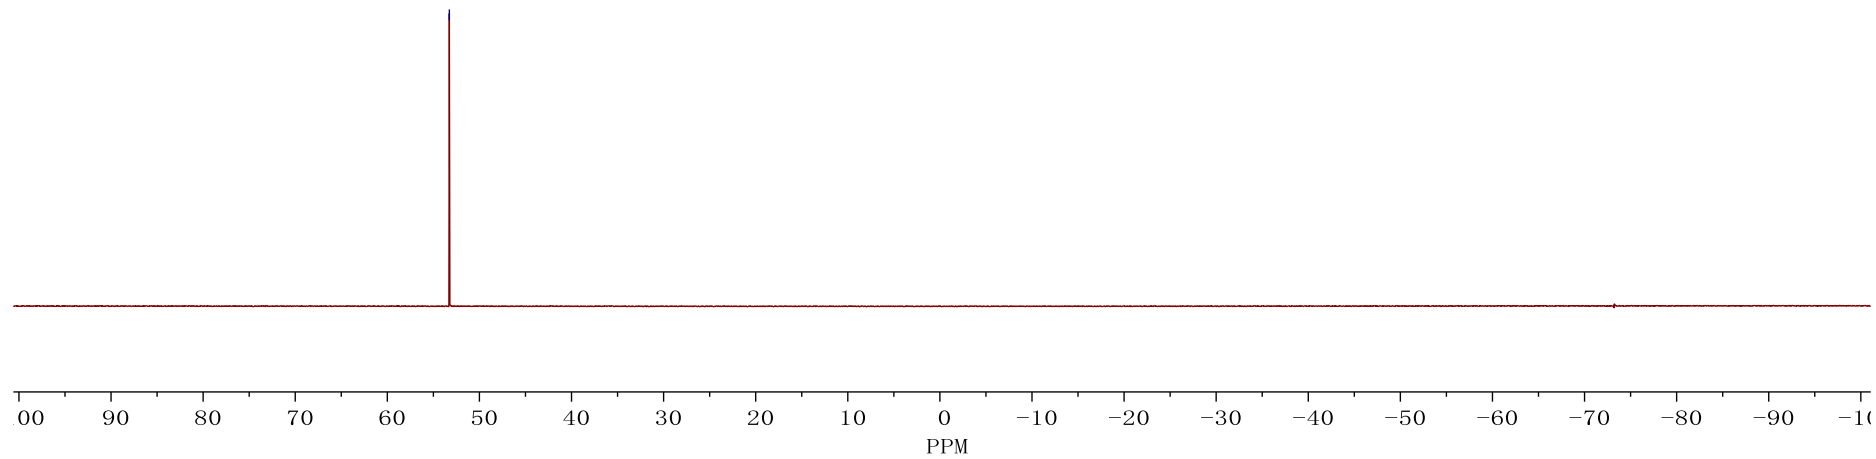

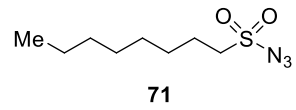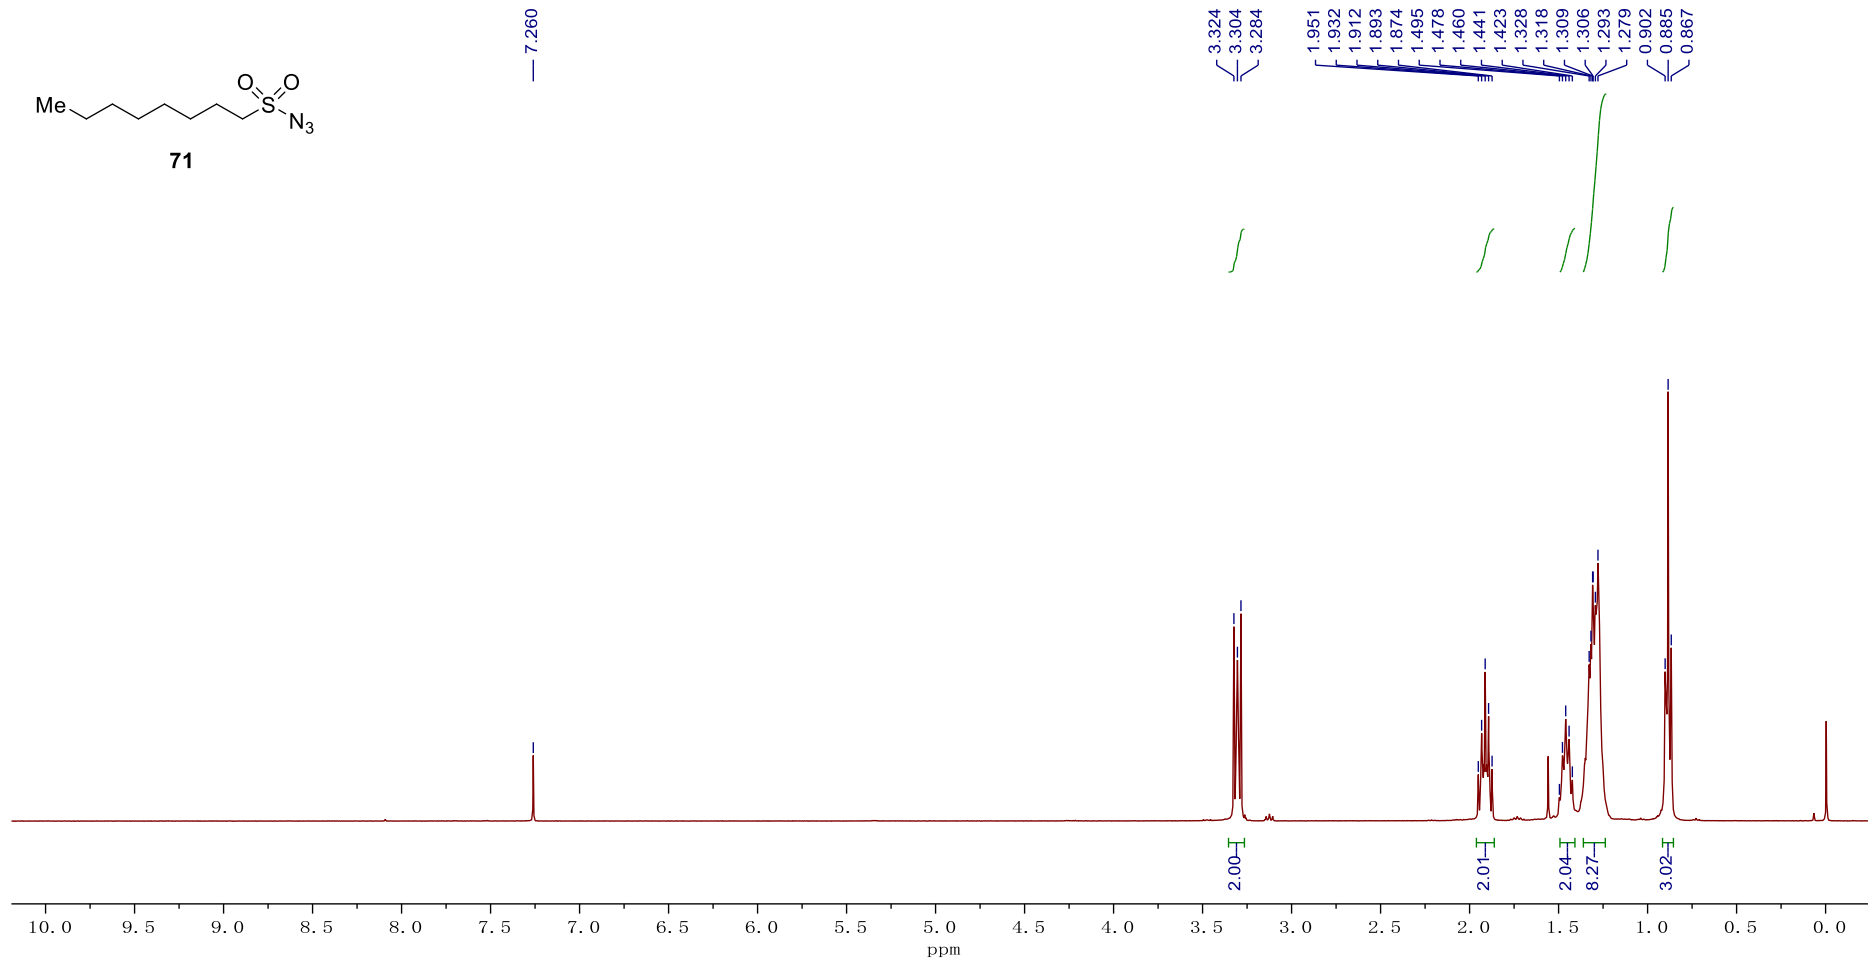



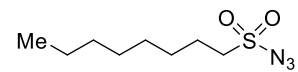

71

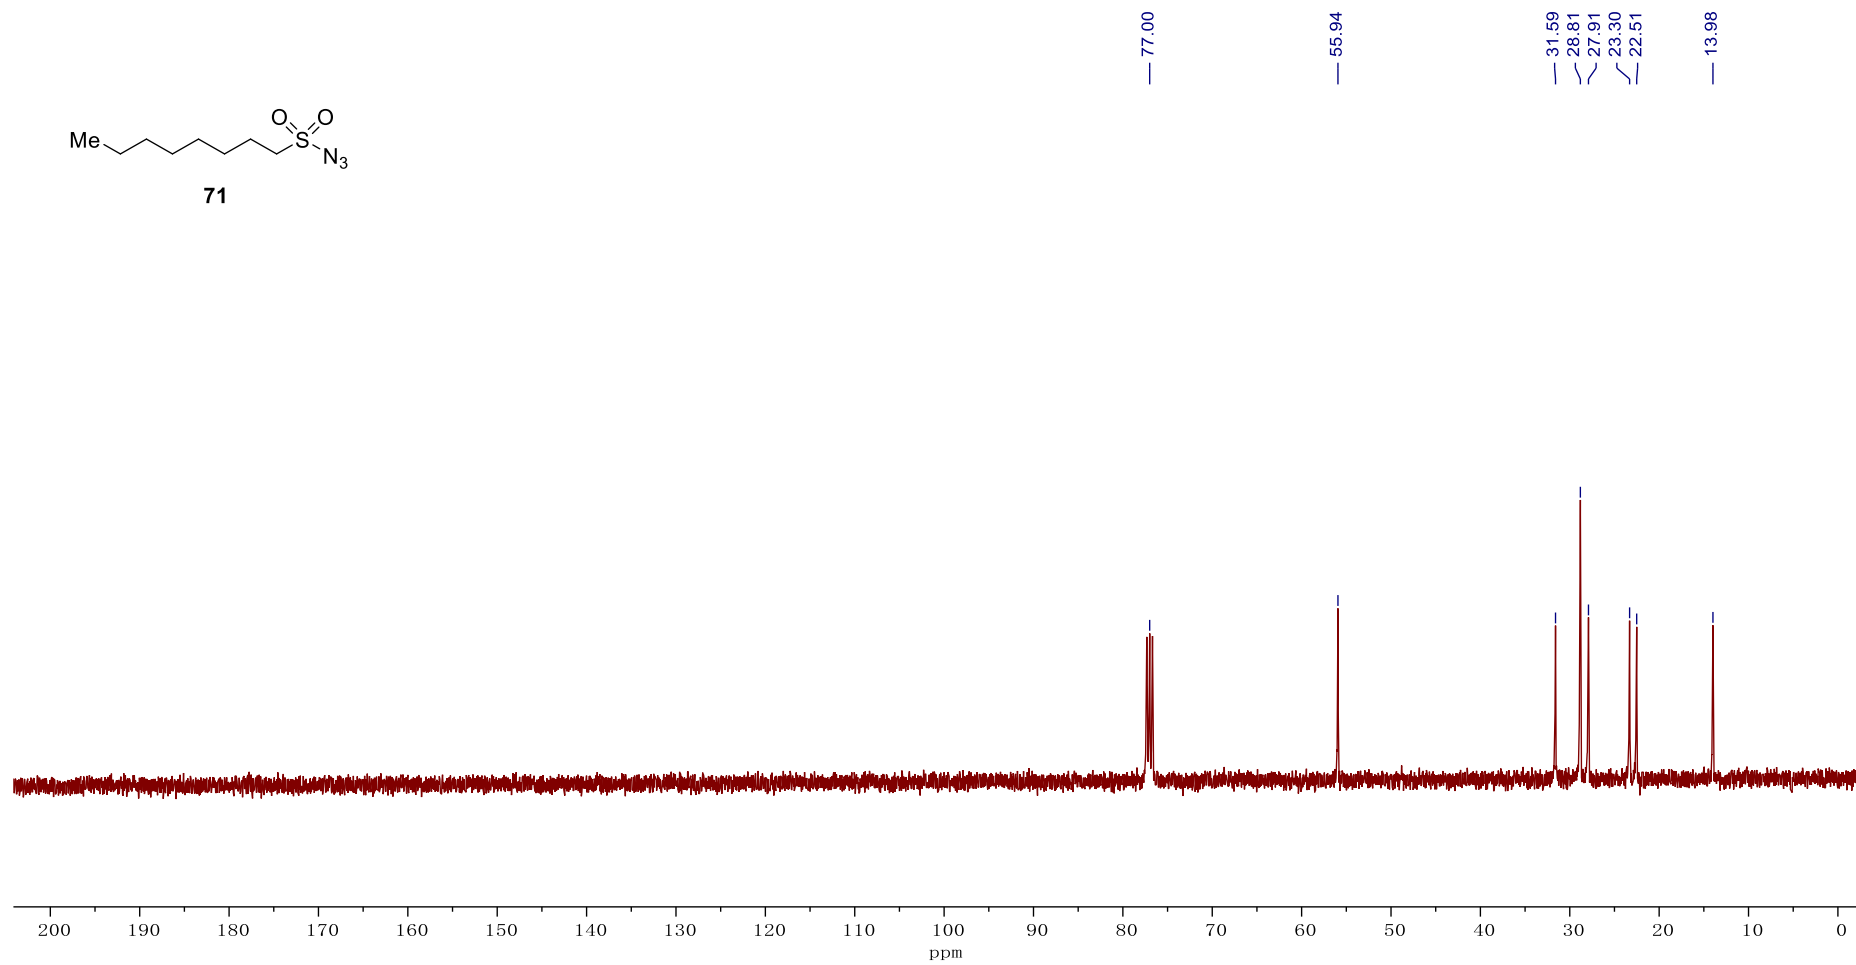

S193

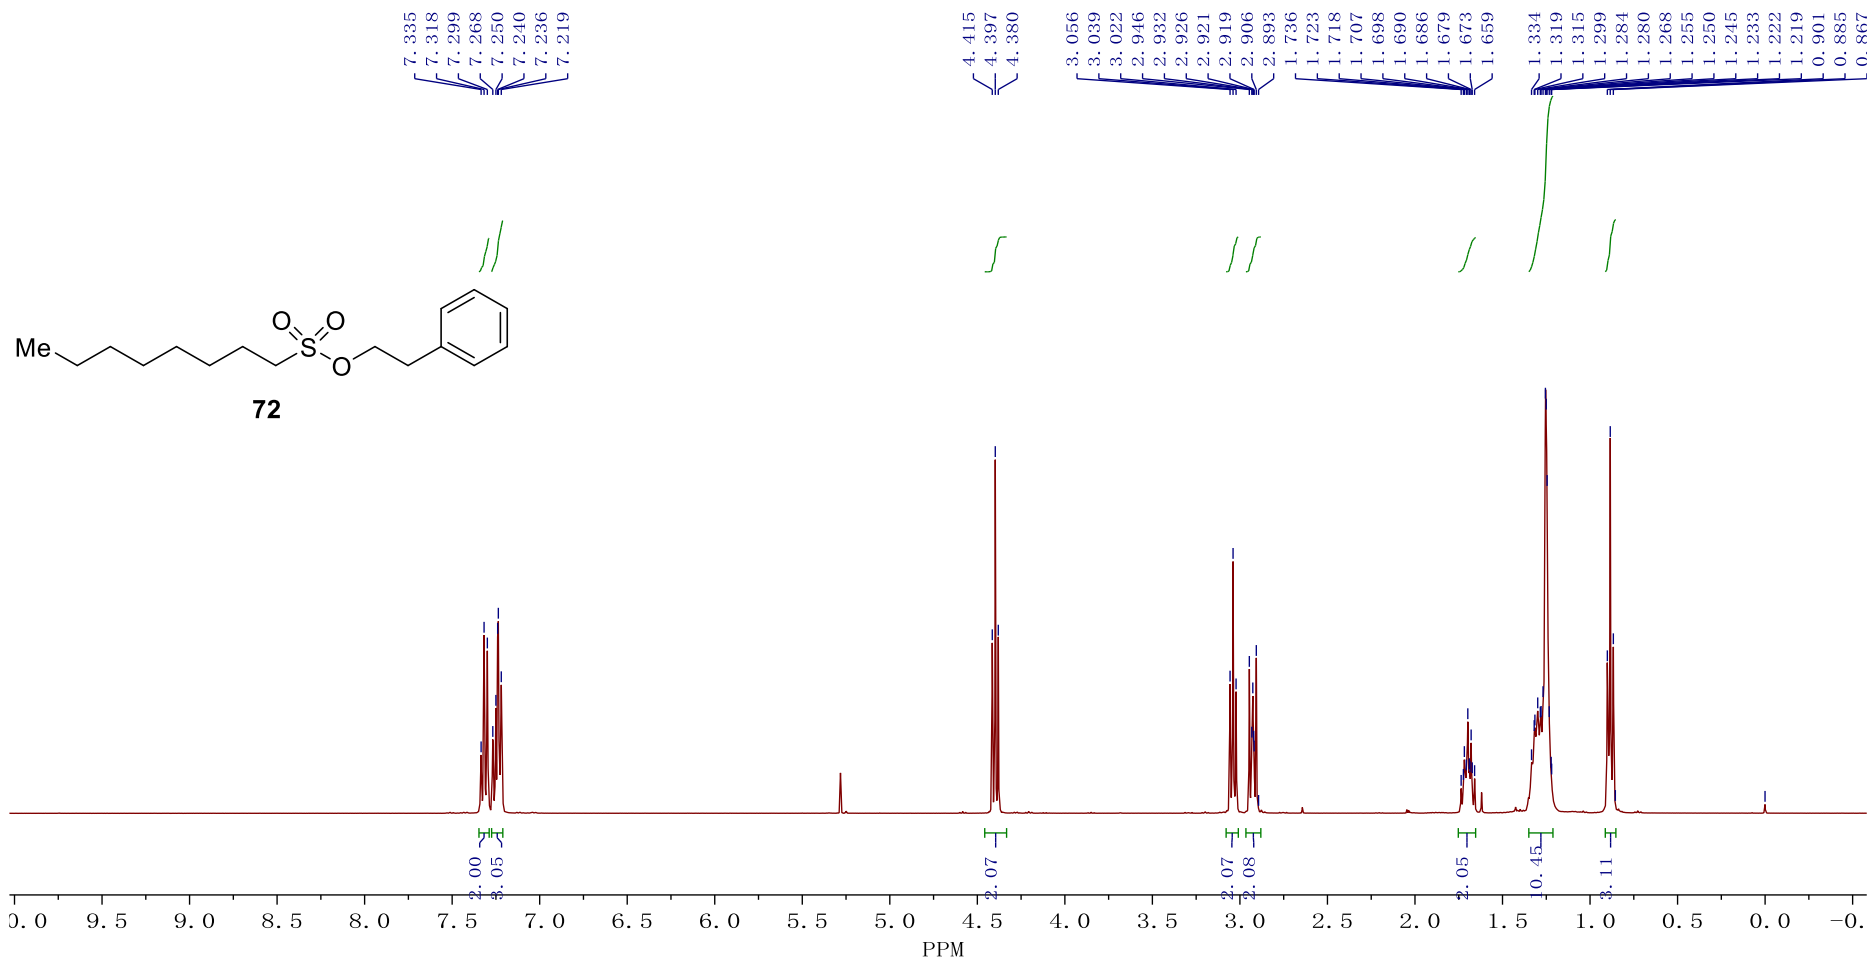

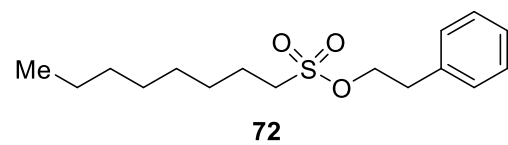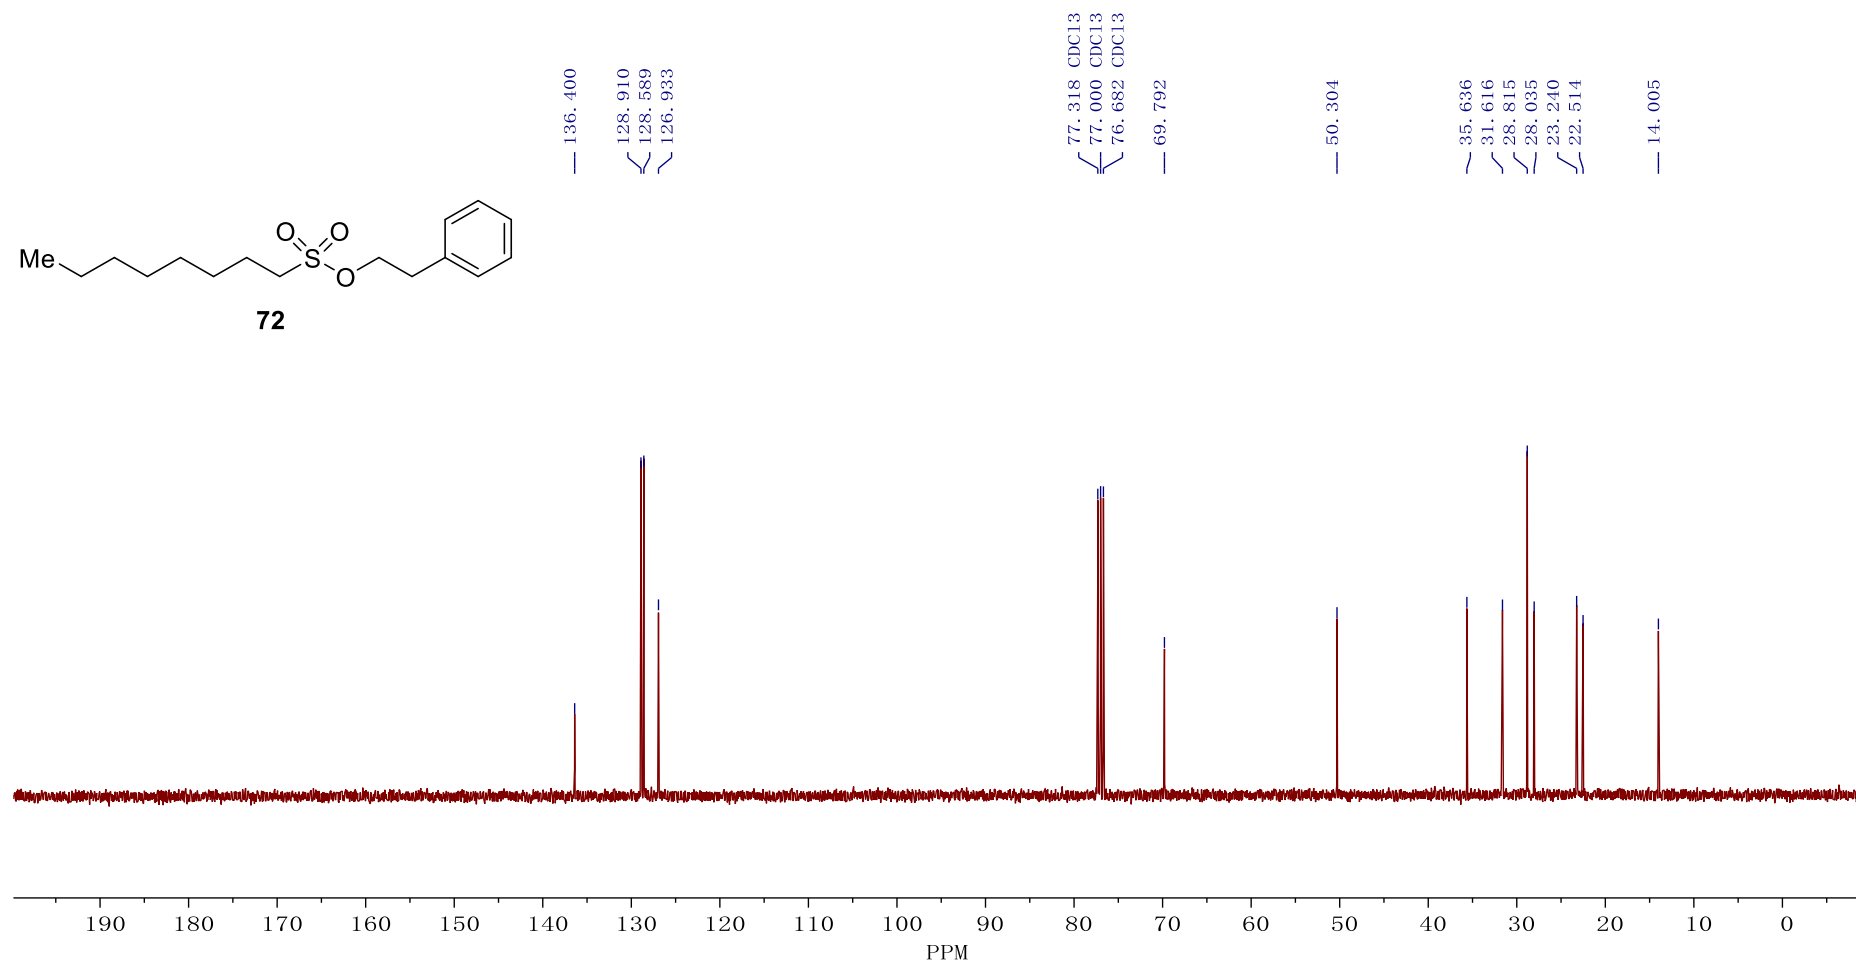

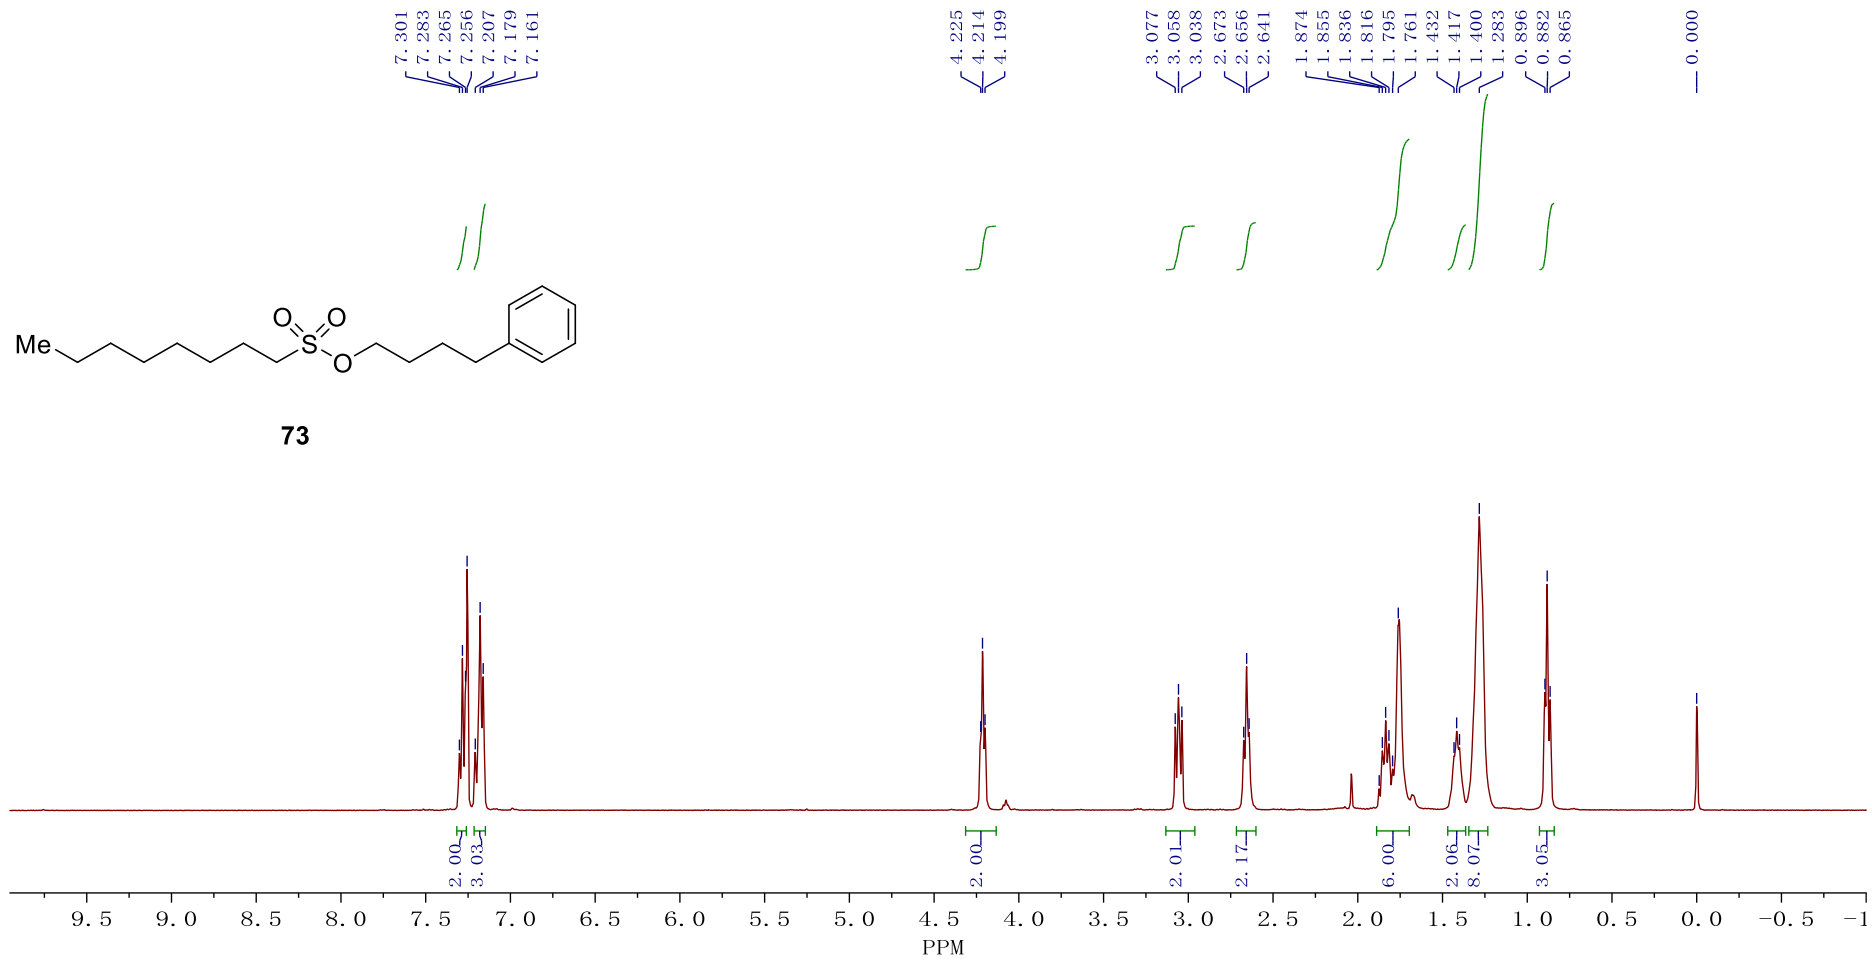

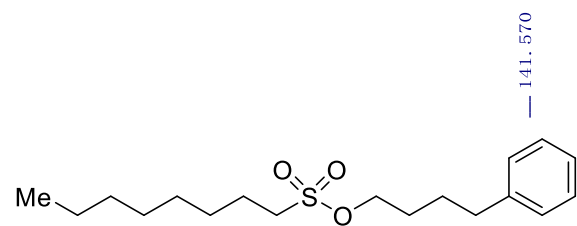

73

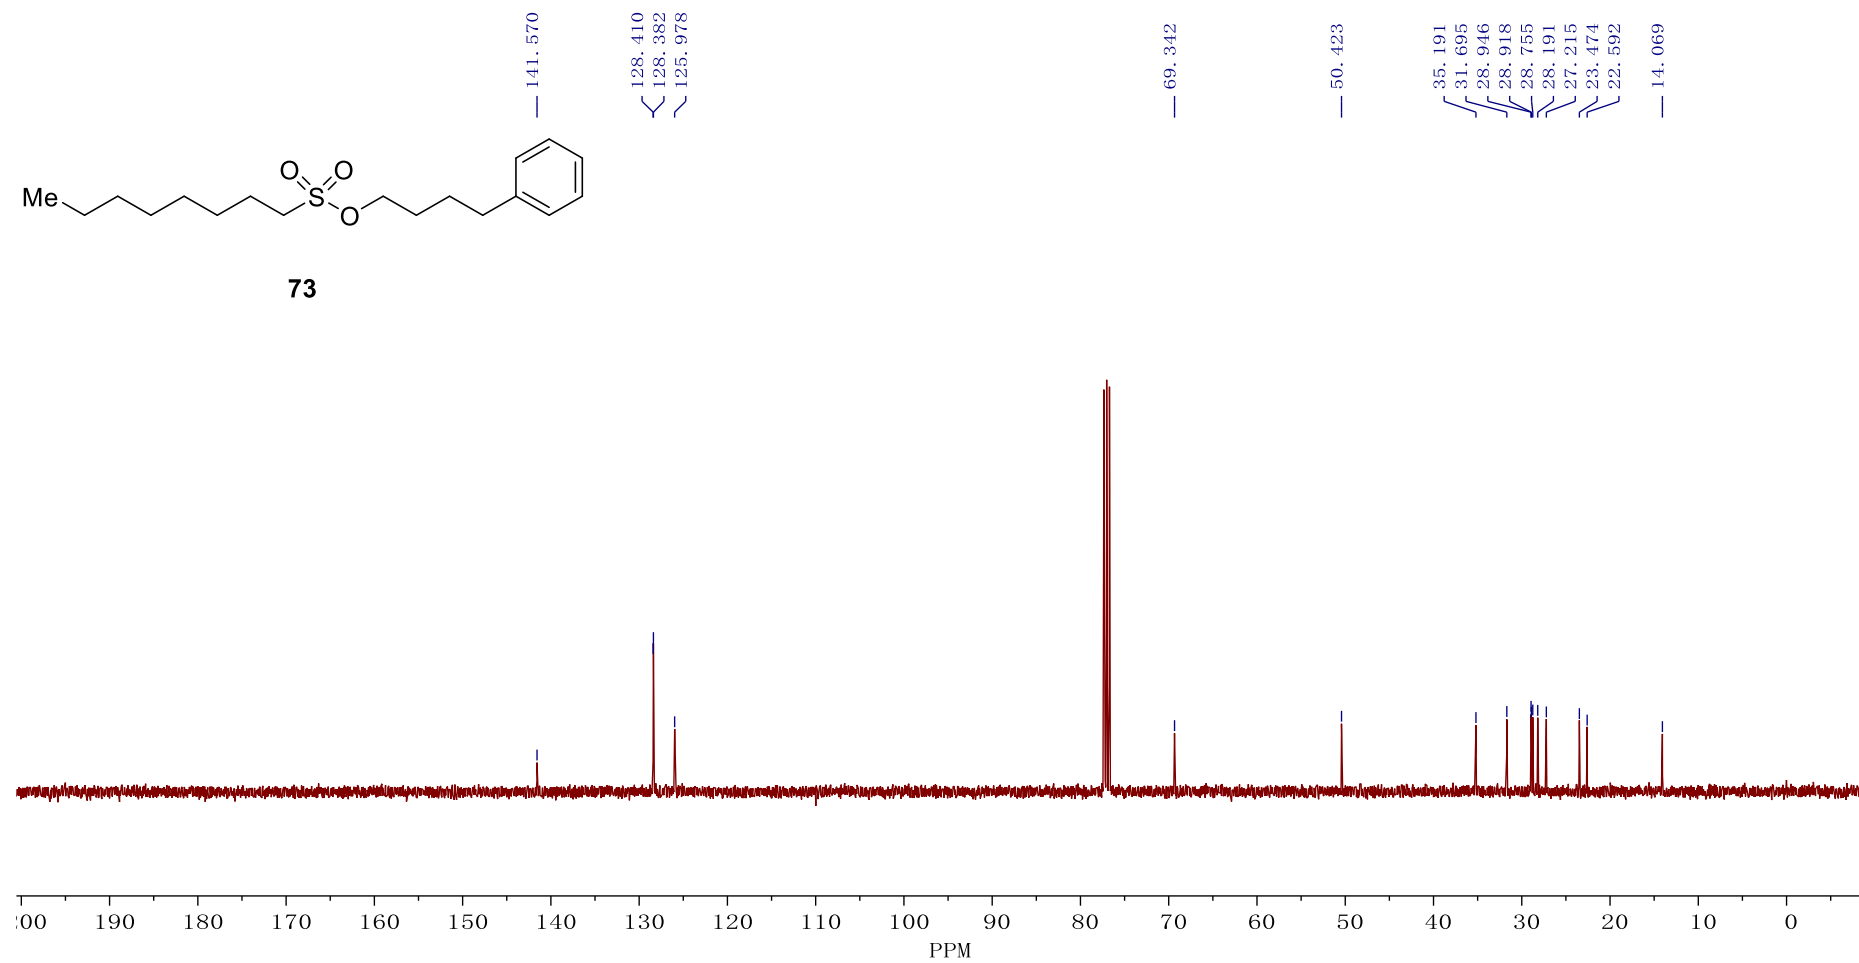

S197

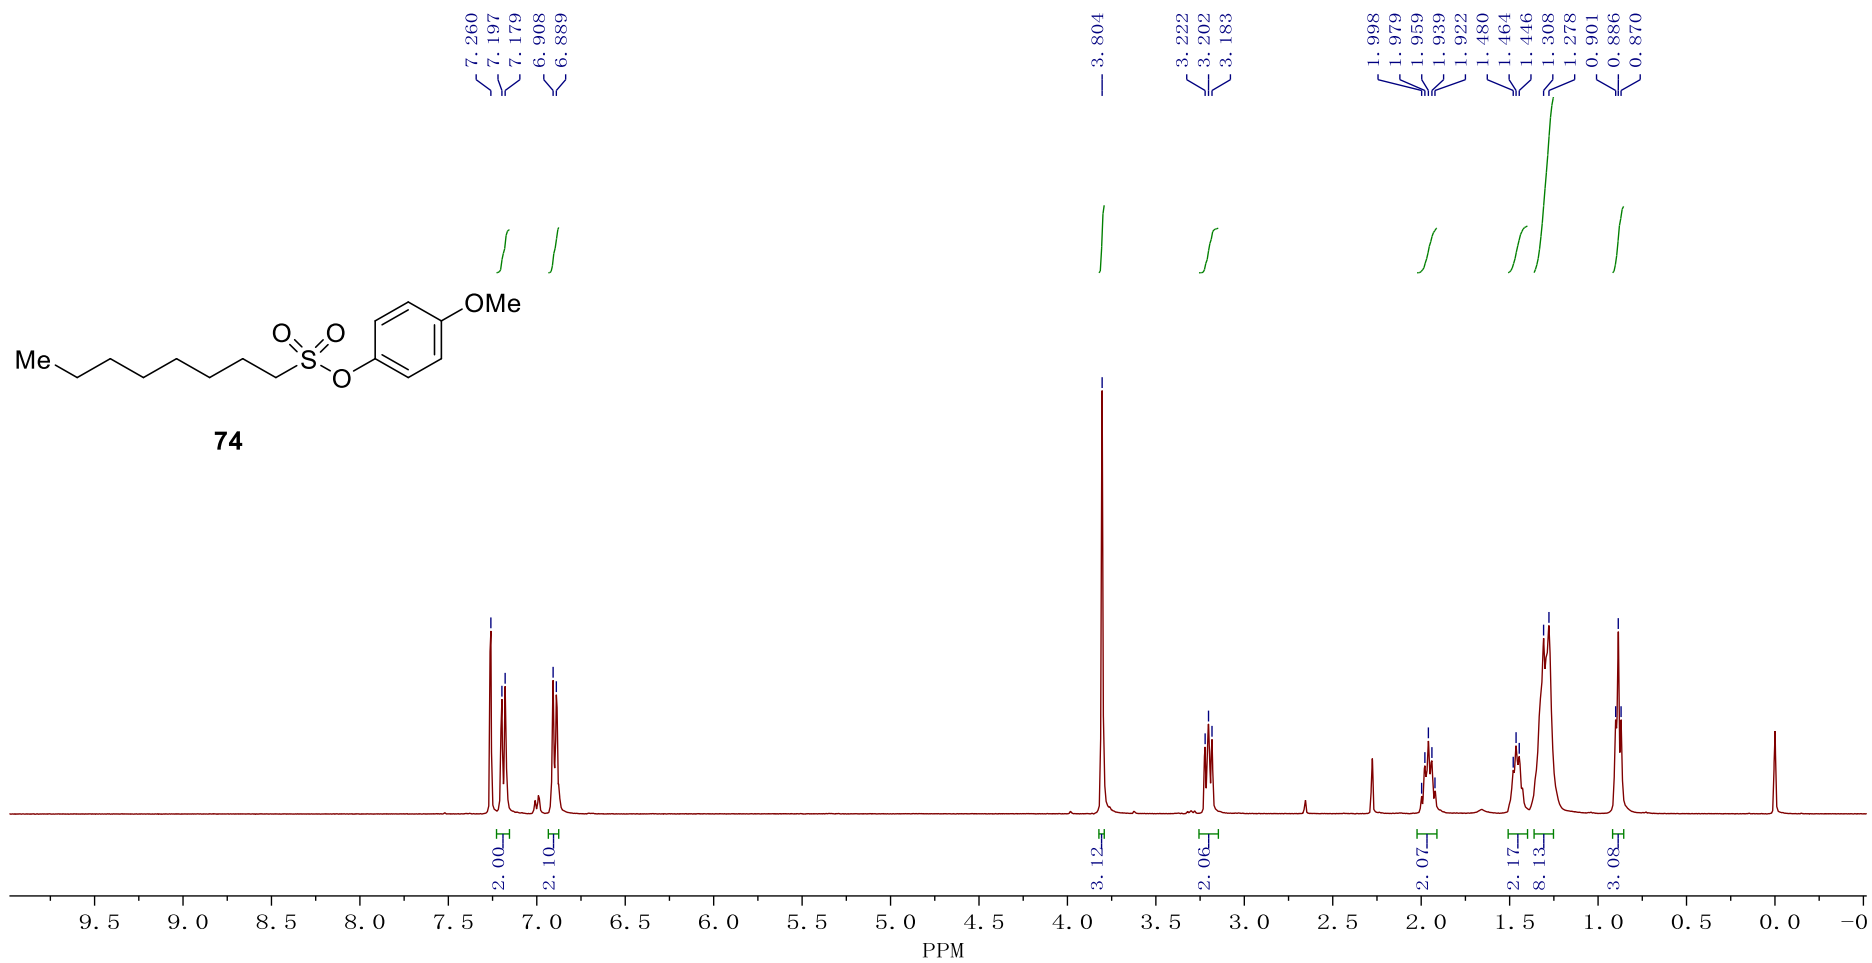

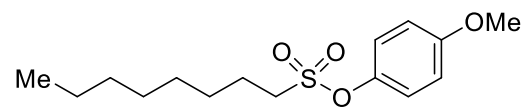

74

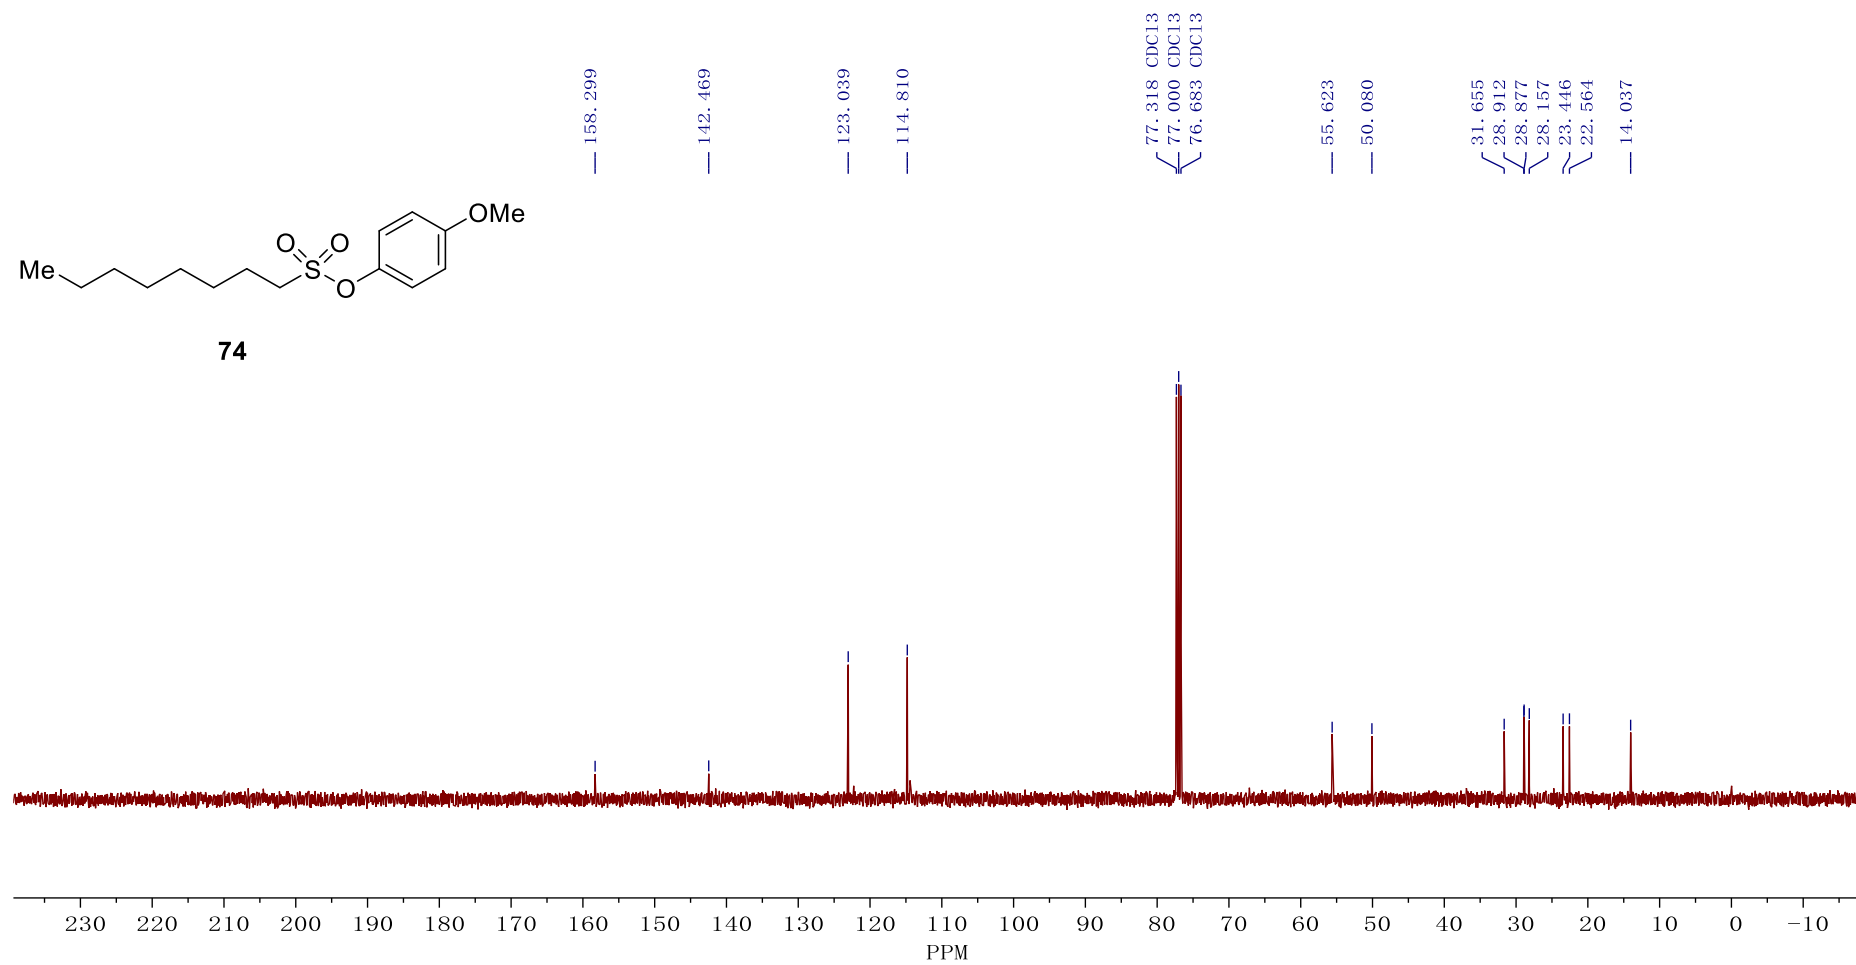

S199

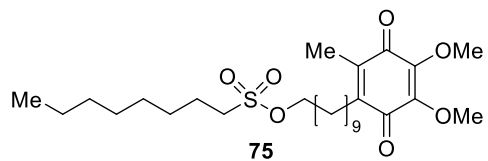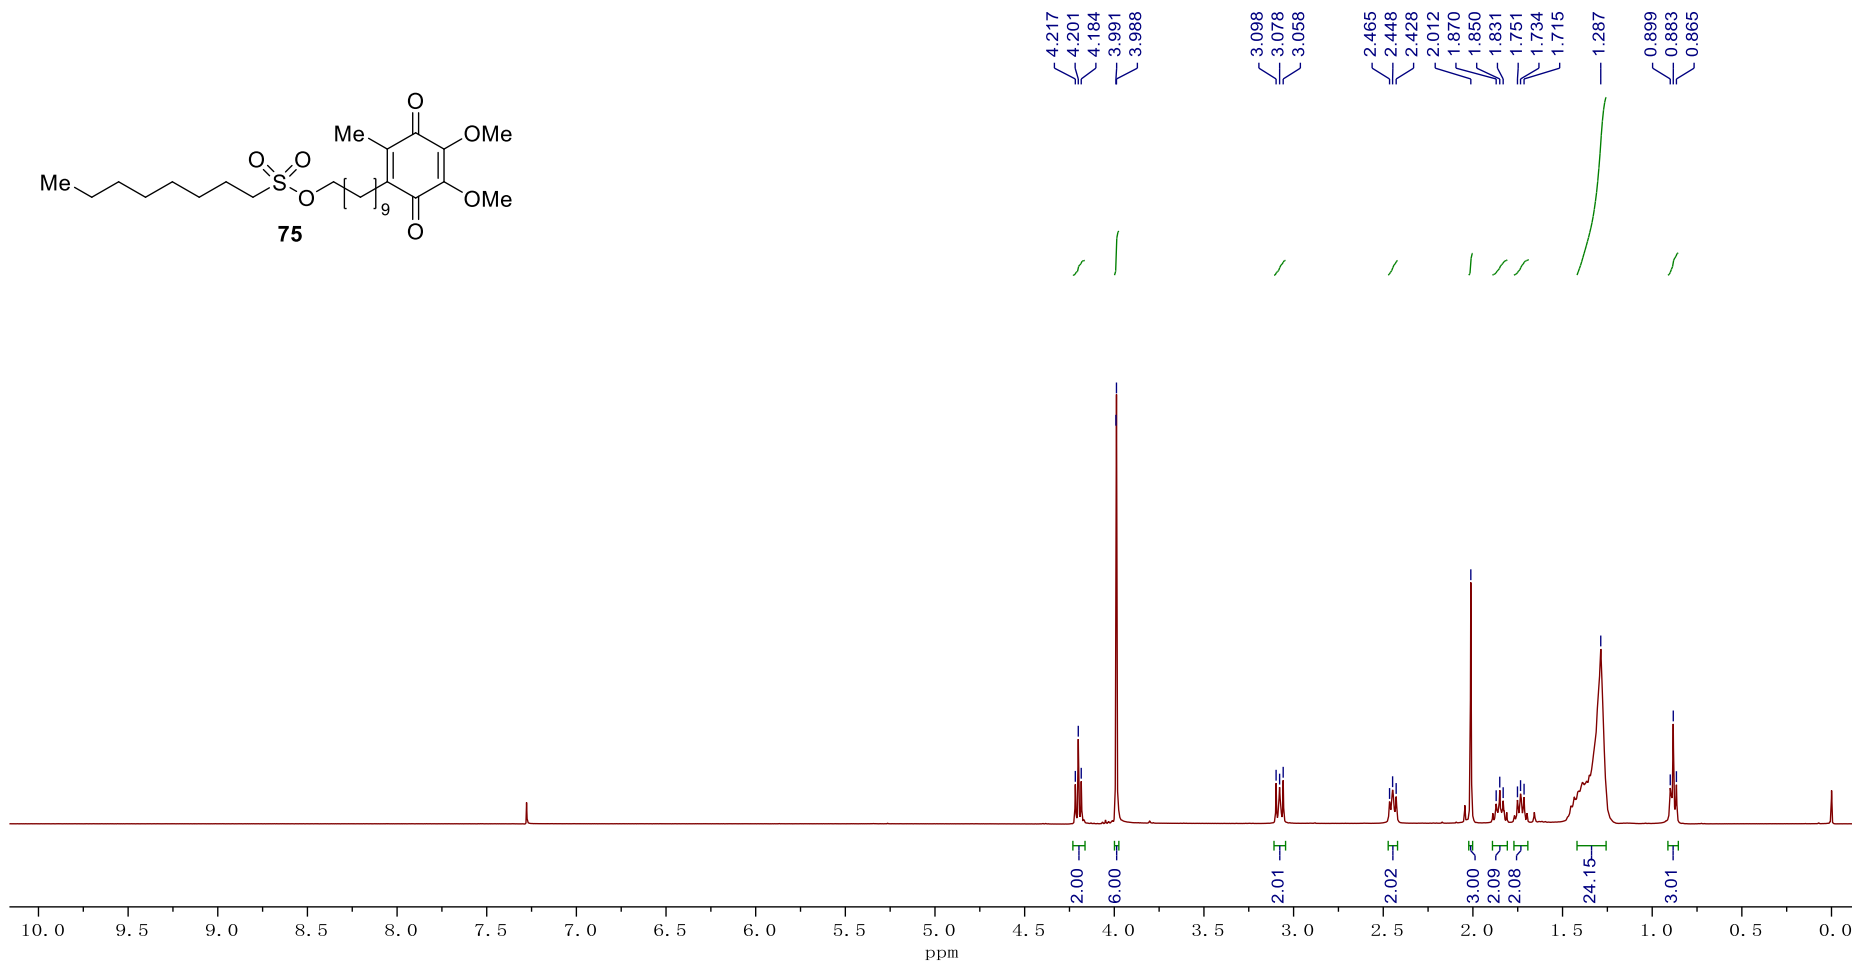

S200



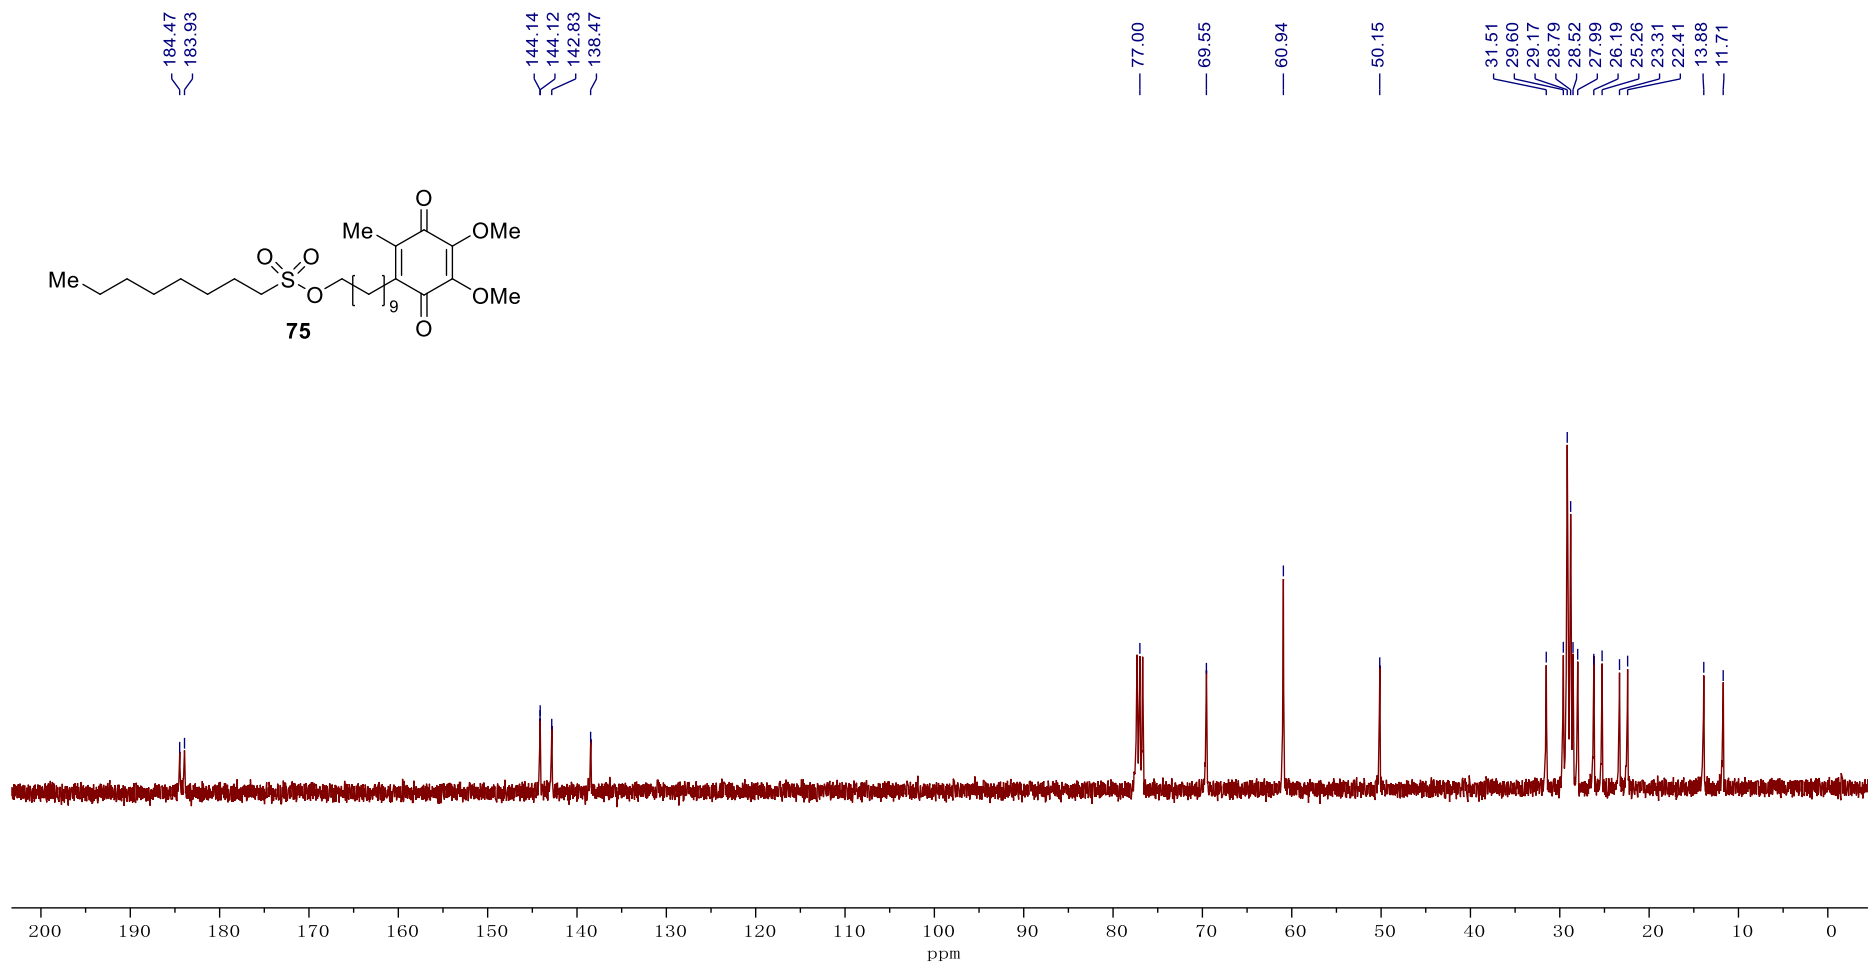

S201



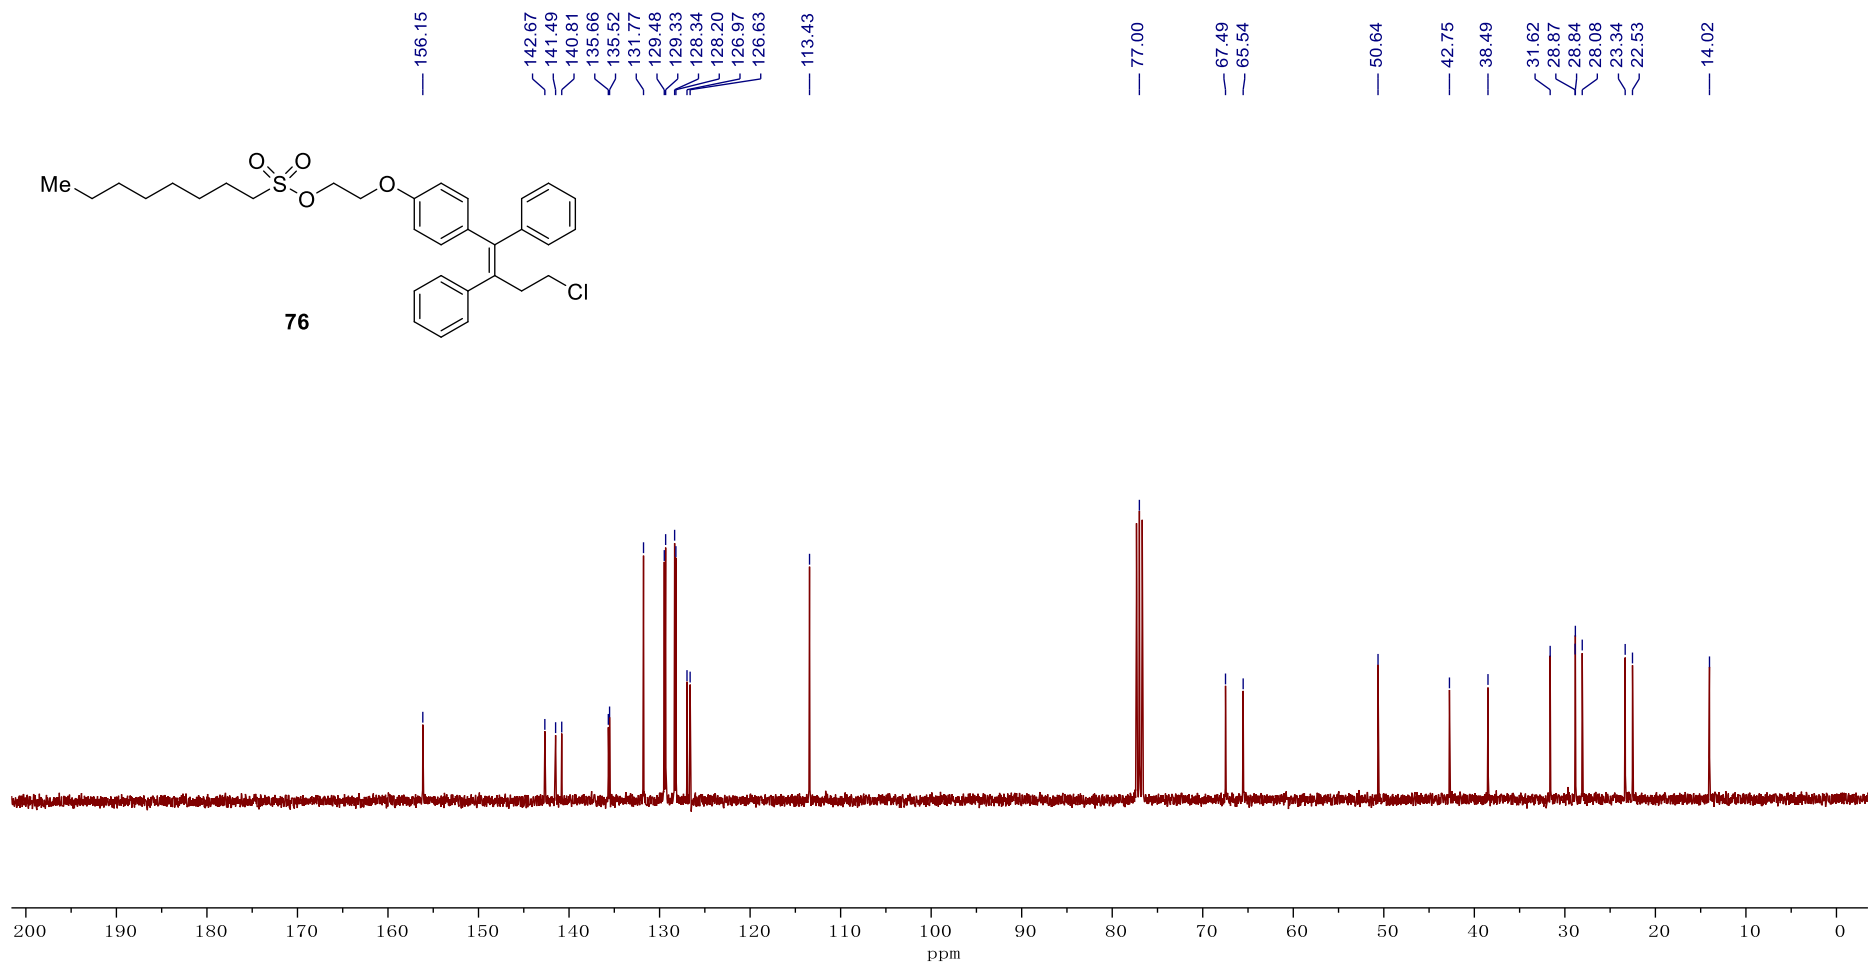

S203

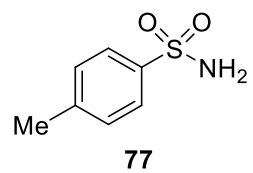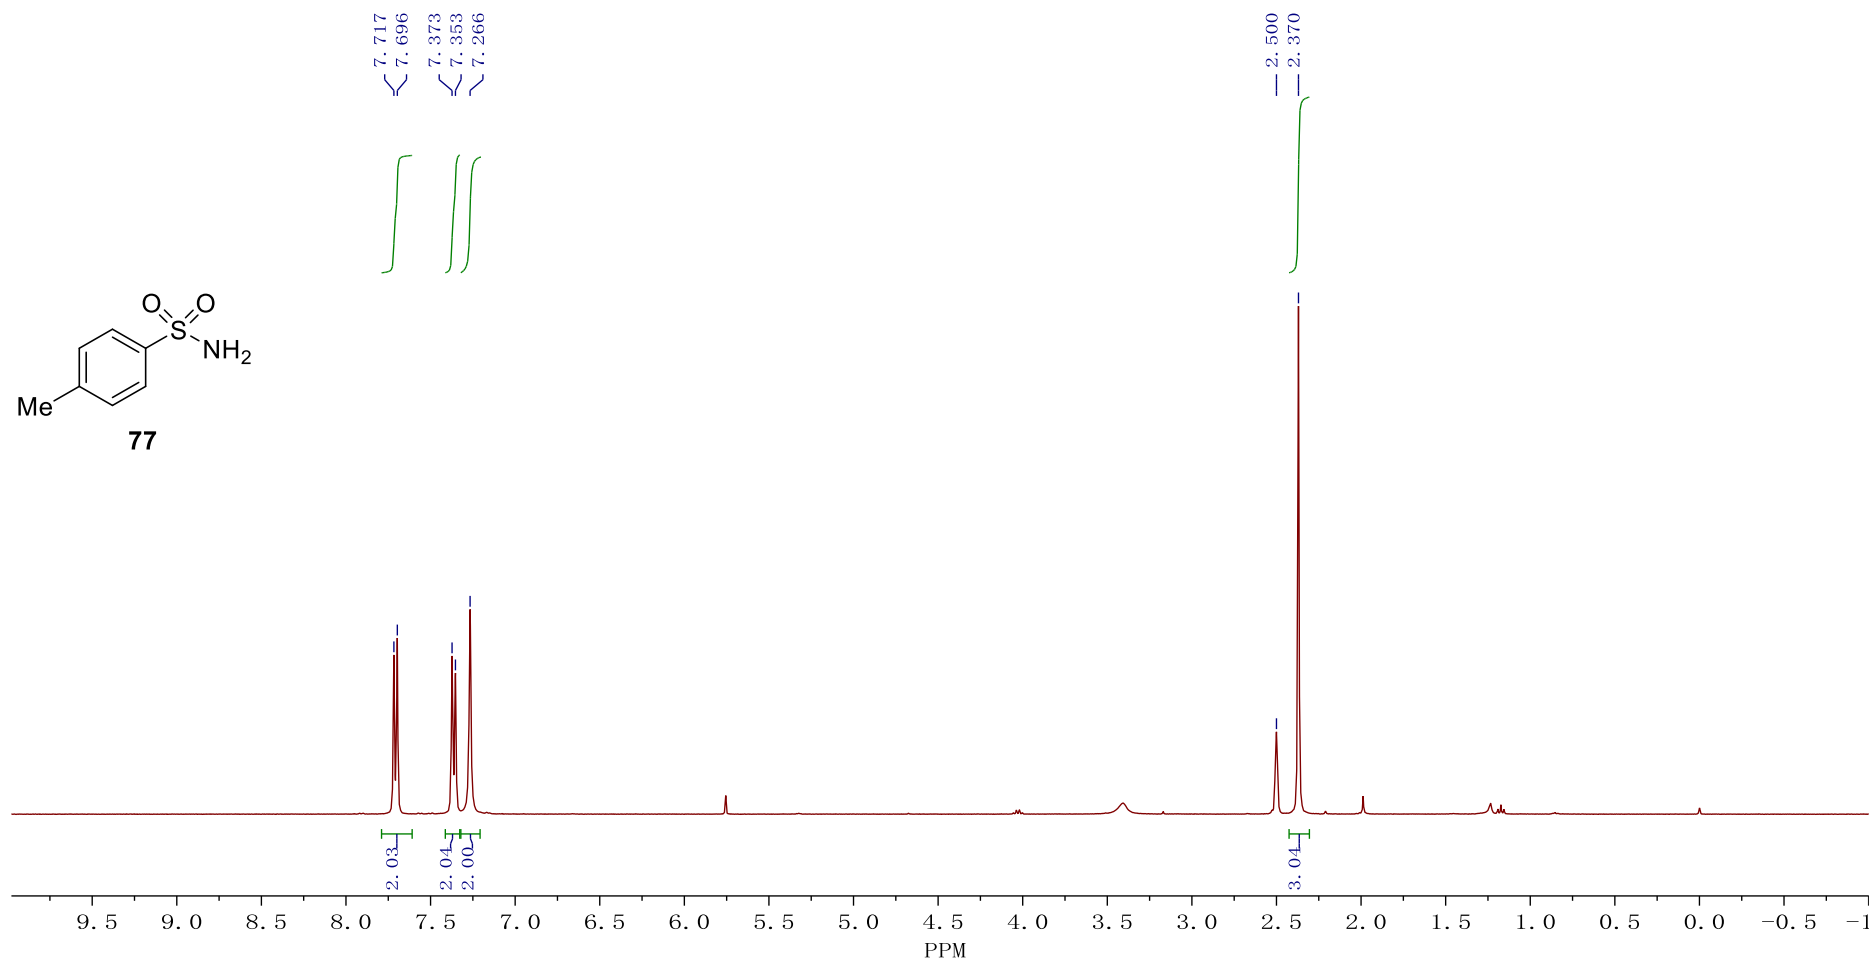

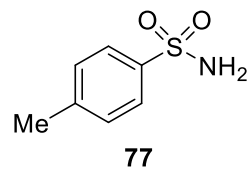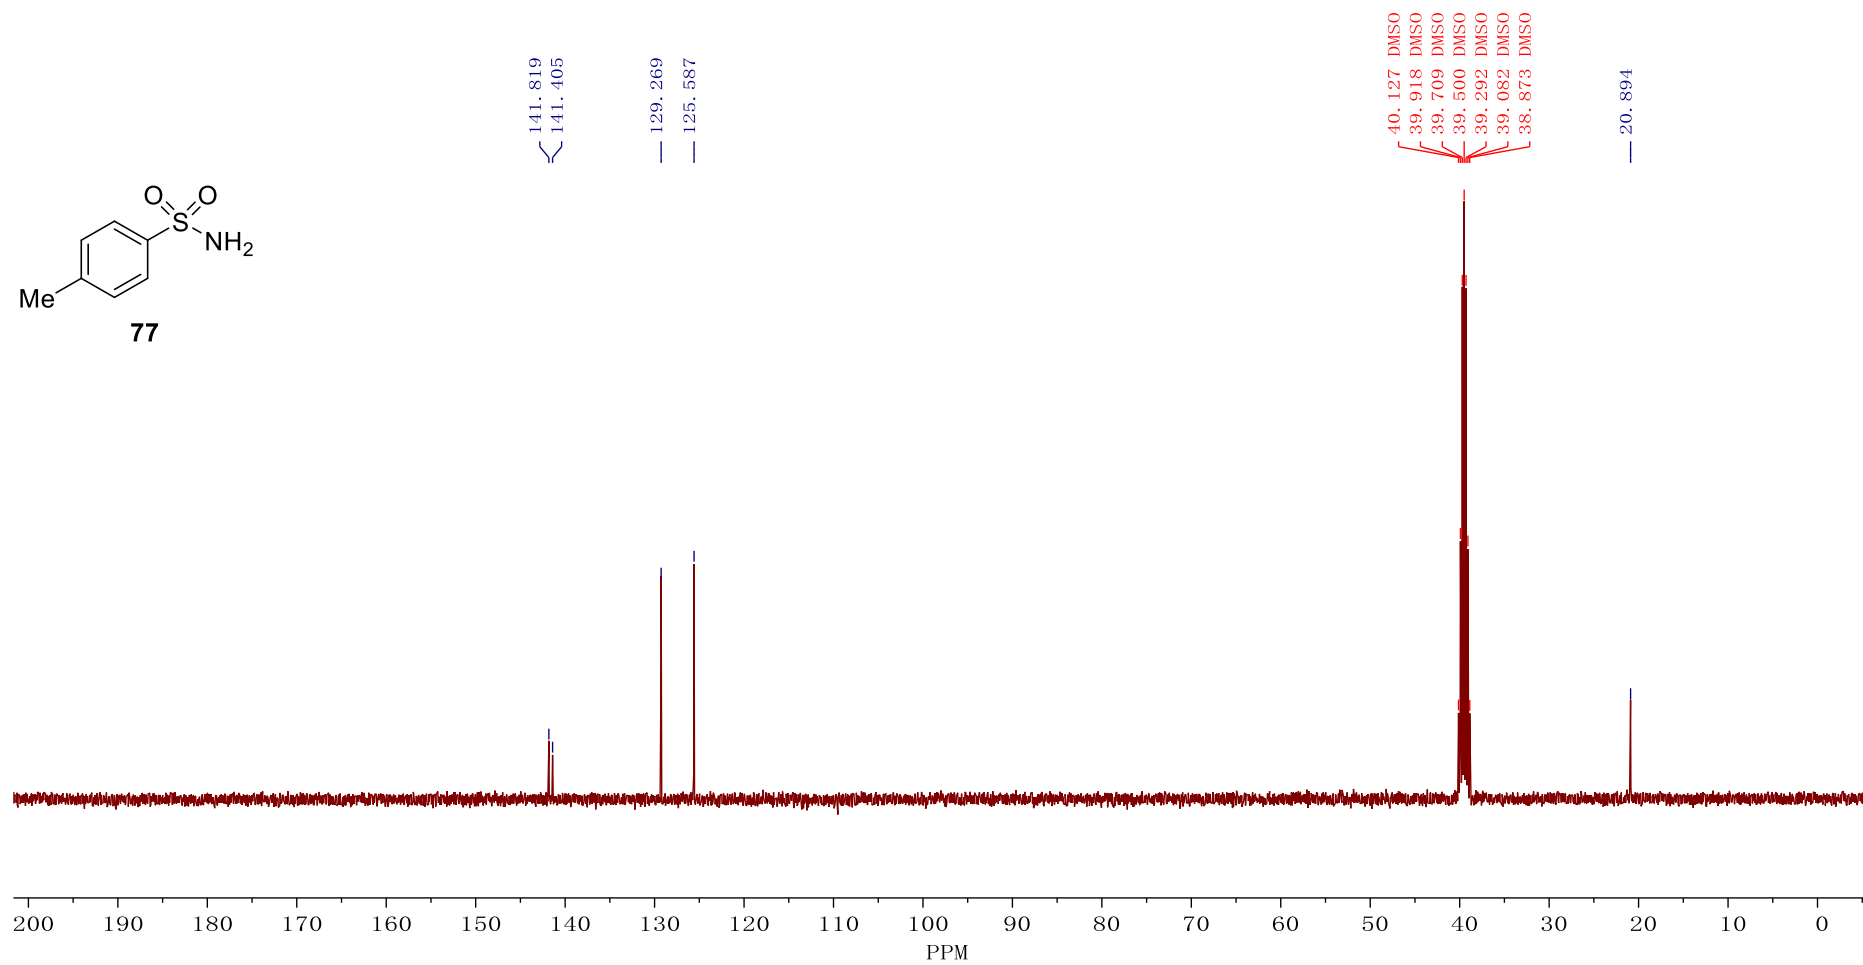

S205

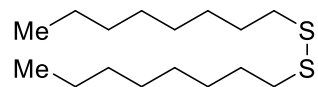

78

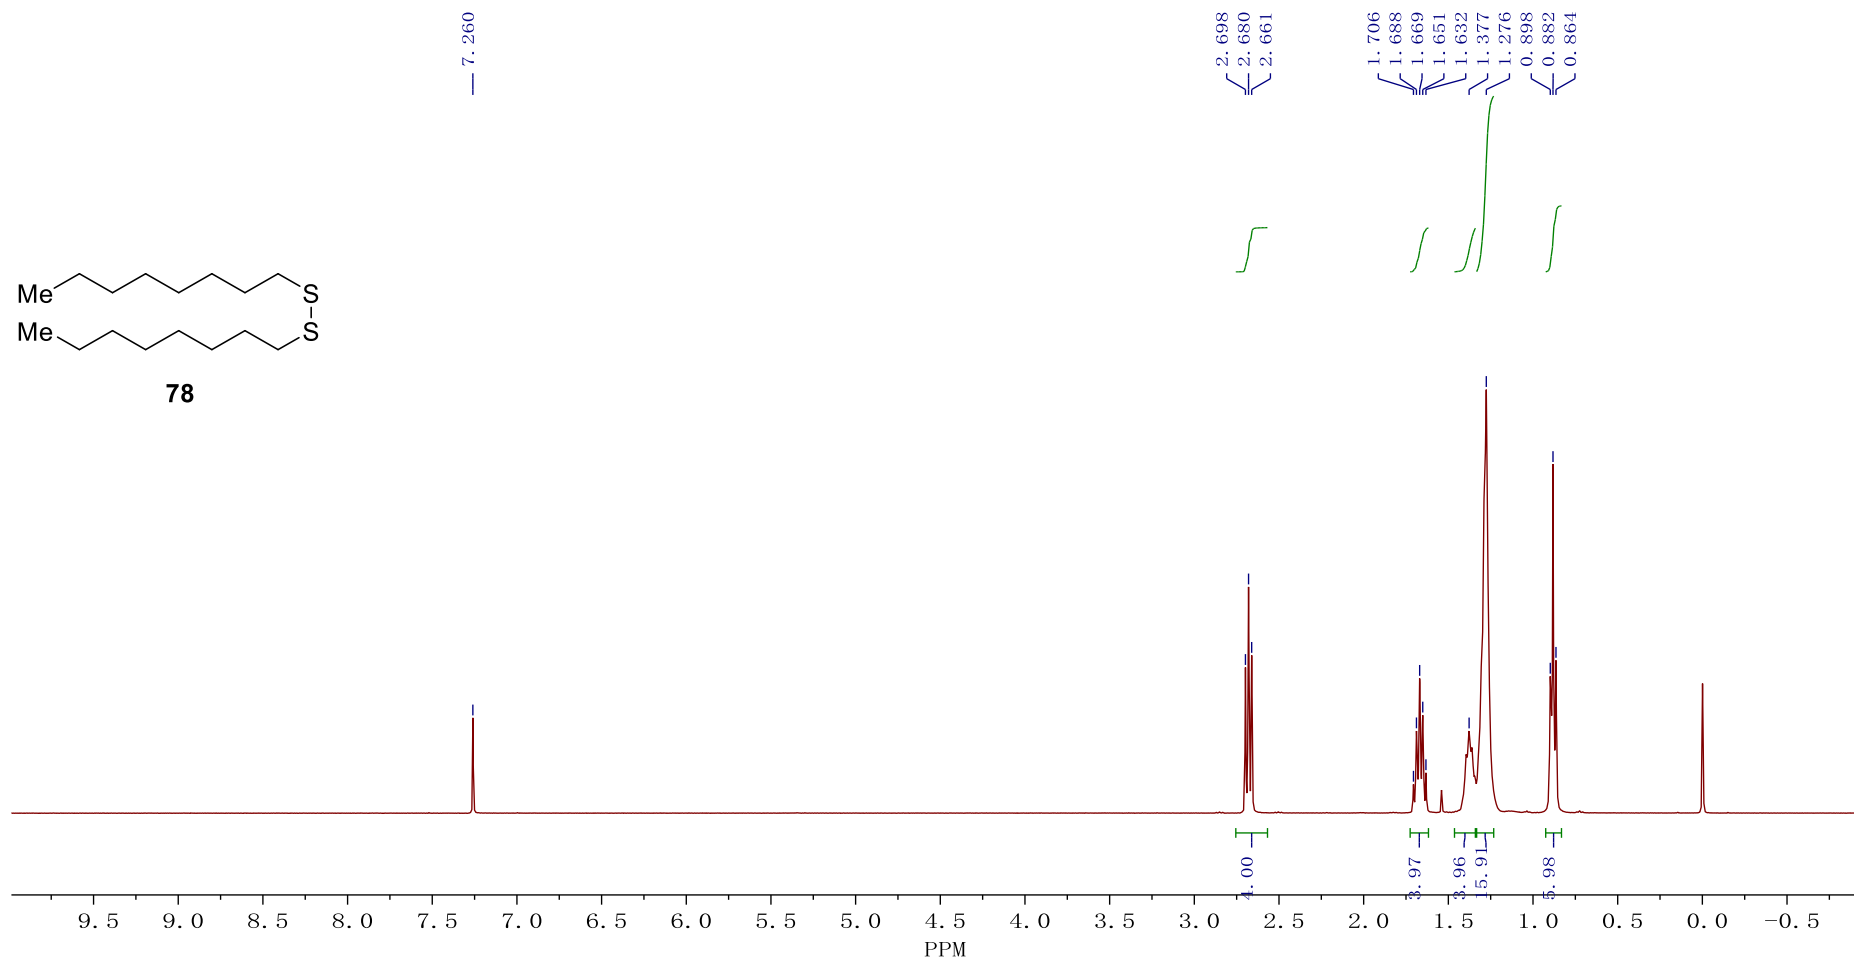

S206

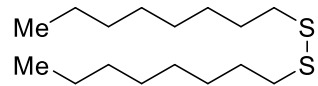

78

77.317 CDC13  
77.000 CDC13  
76.682 CDC13

39.213

31.808

29.226

29.201

29.176

28.536

22.645

14.093

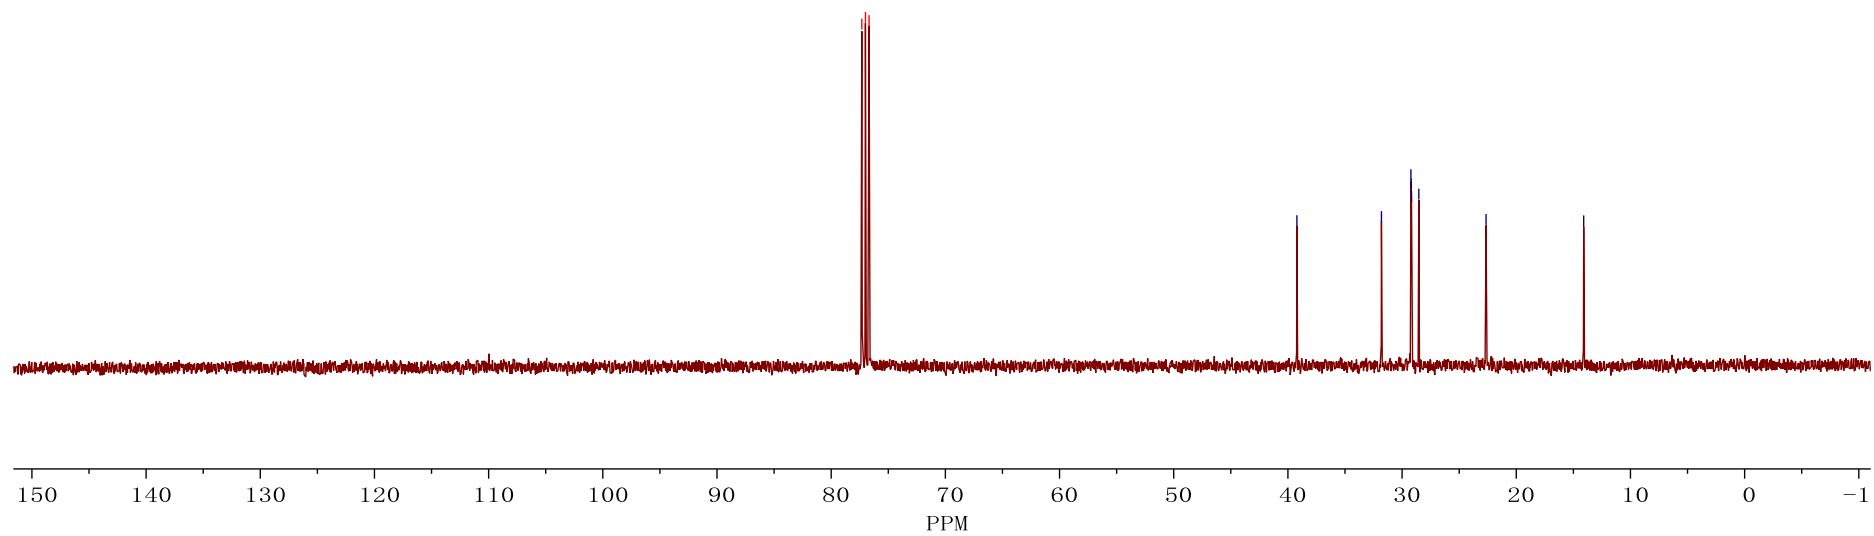

S207

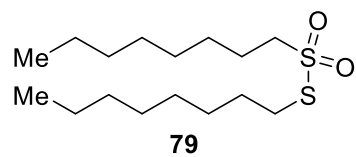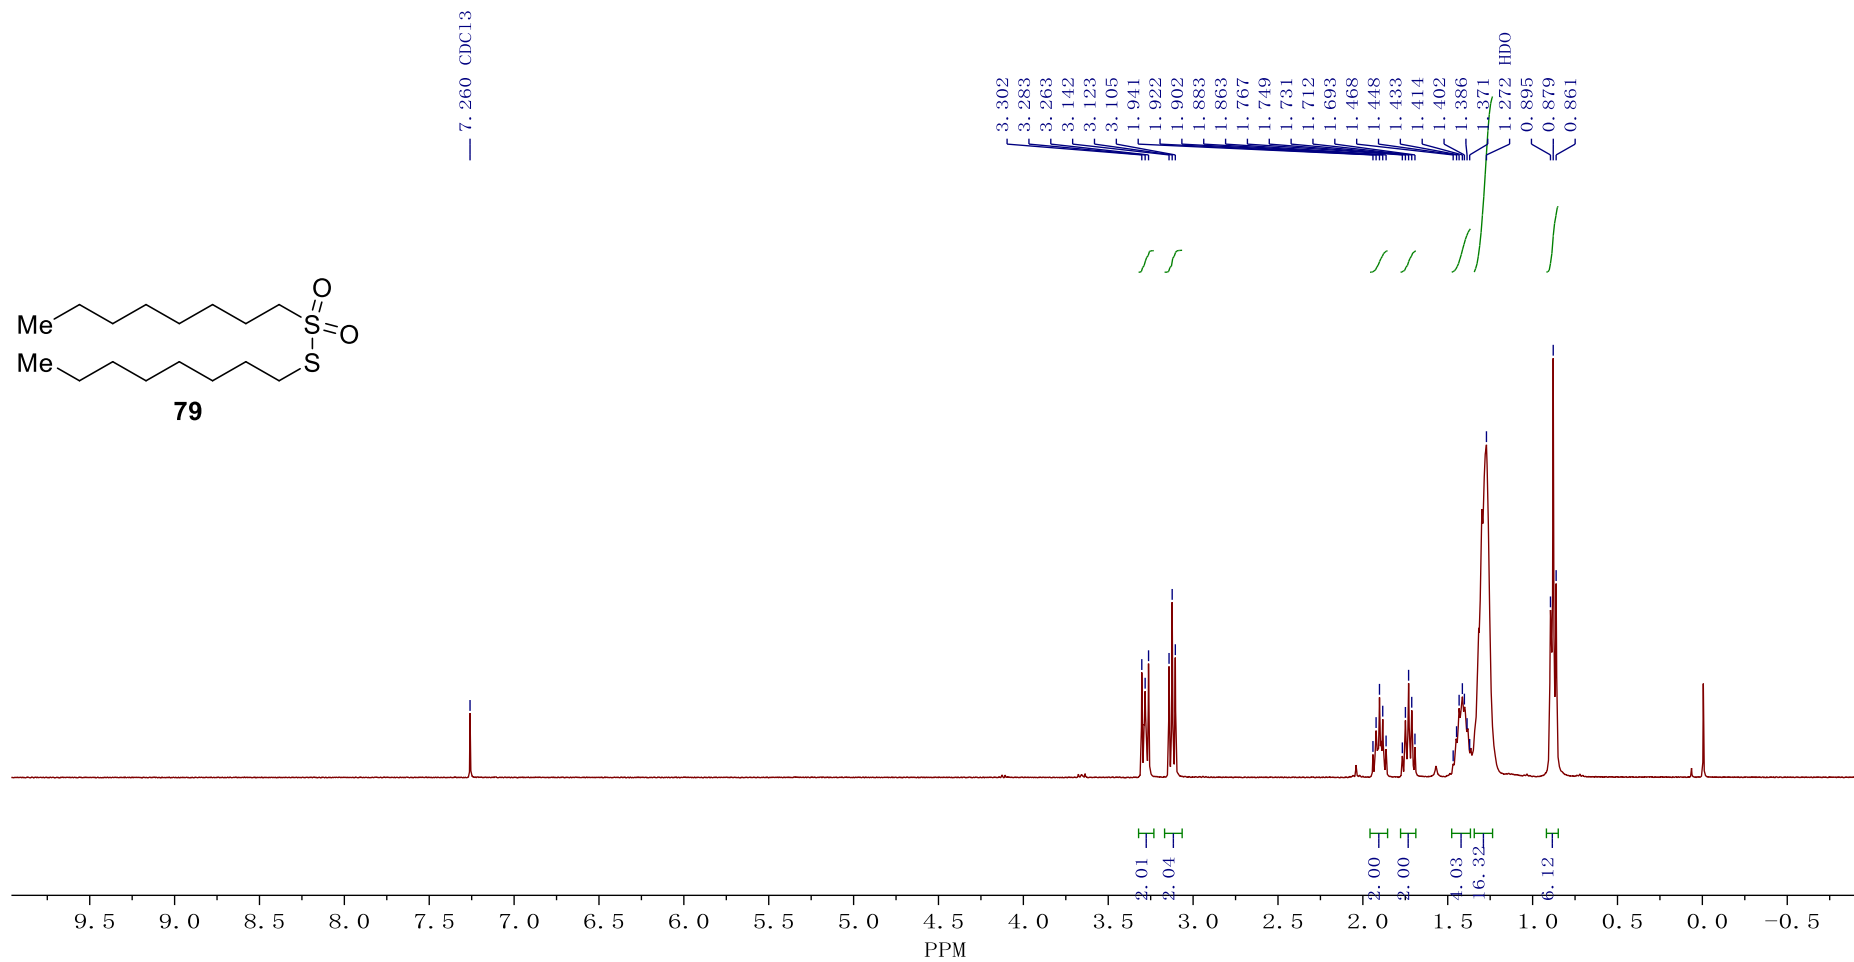



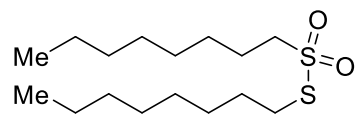

79

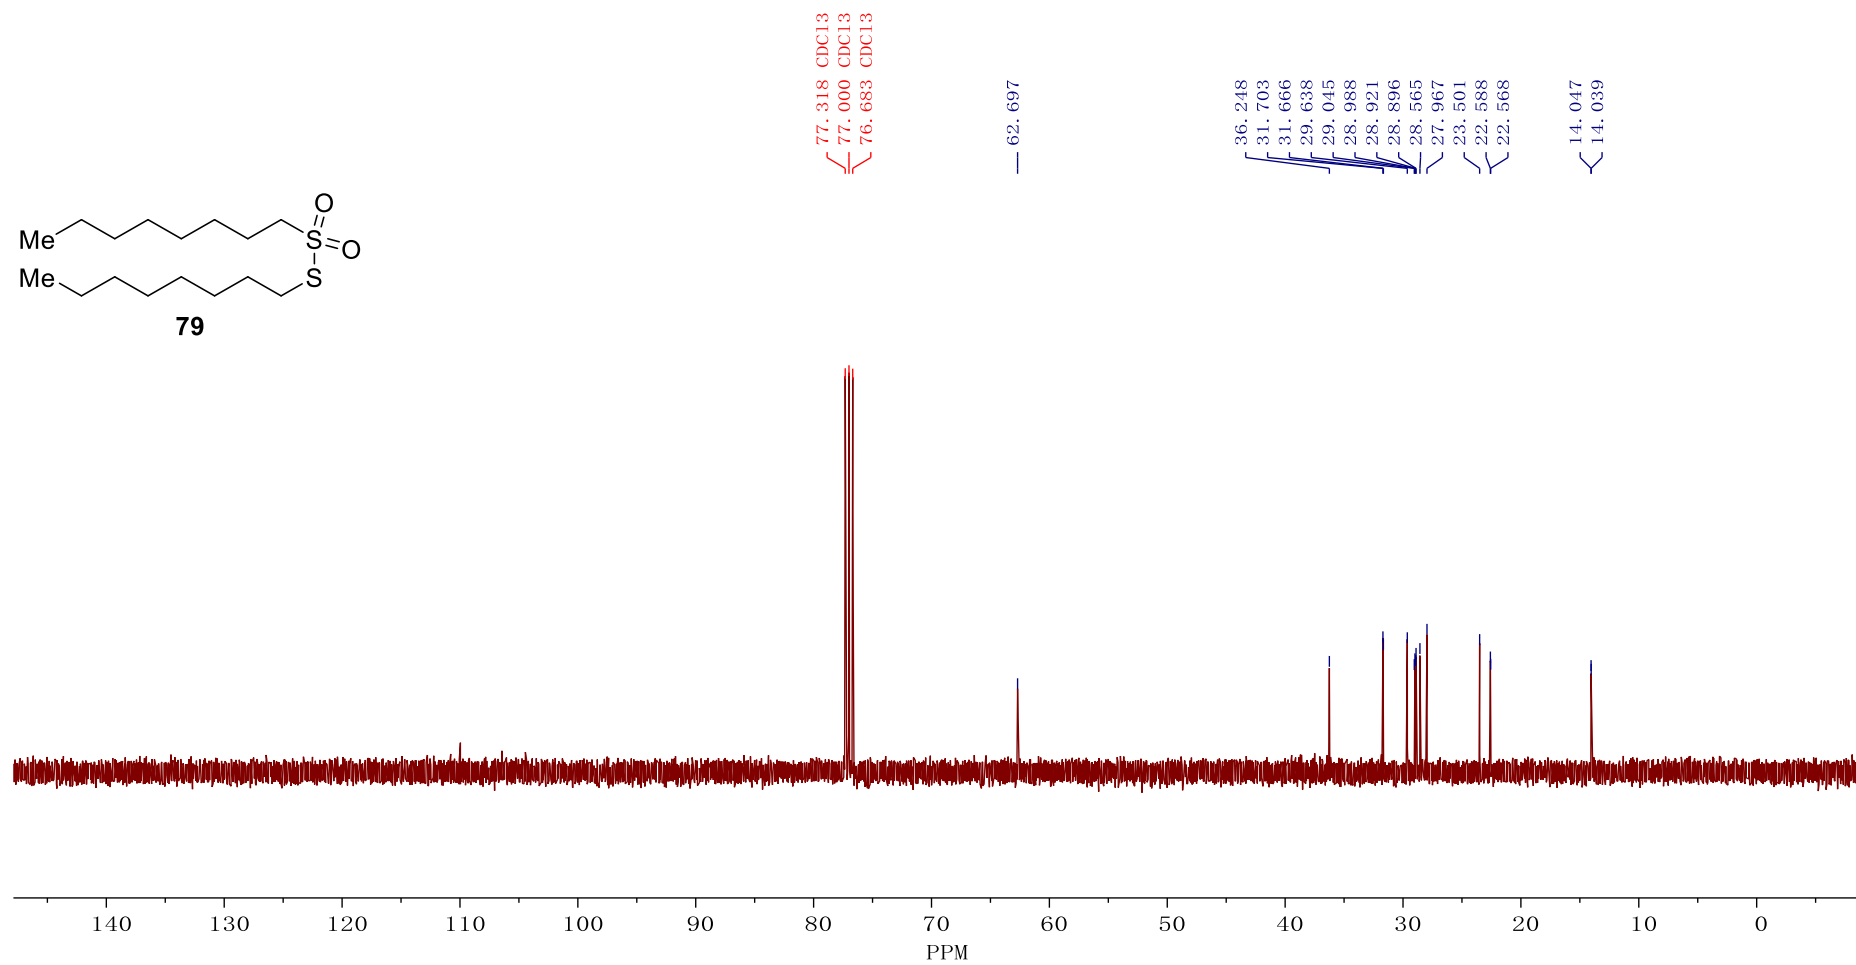

S209
